# Supplementary material for: Seasonality and alternative floral resources affect reproductive success of the alfalfa leafcutting bee, Megachile rotundata
Source: PeerJ. 2024 Aug 16;12:e17902. doi: 10.7717/peerj.17902 (PMC11332388; doi:10.7717/peerj.17902)
Supplement: Supplemental Information 14 [file peerj-12-17902-s014.xlsx]

## Sheet: alfalfa floral density
site	weeks after bee release	mean(open and new+old tripped flowers per plot)	sqrt(mean (open and new+old tripped flowers per plot))
1	2	2.80152e+06	1673.77
1	3	2.0837e+06	1443.5
1	4	1.29886e+06	1139.68
1	5	811641	900.911
1	6	129295	359.576
1	7	257013	506.965
1	8	219959	468.998
1	9	150581	388.048
2	2	1.66112e+06	1288.85
2	3	1.34932e+06	1161.6
2	4	478549	691.772
2	5	514420	717.231
2	6	650416	806.484
2	7	583798	764.067
2	8	187241	432.714
2	9	111162	333.41
3	2	1.00282e+06	1001.41
3	3	882595	939.465
3	4	259378	509.292
3	5	13402.5	115.769
3	6	42572.7	206.332
3	7	11825.8	108.746
3	8	0	0
3	9	0	0
4	2	1.53459e+06	1238.79
4	3	888508	942.607
4	4	216805	465.624
4	5	9066.41	95.2177
4	6	113527	336.938
4	7	65435.8	255.804
4	8	56369.4	237.422
4	9	0	0
5	2	2.82202e+06	1679.89
5	3	842388	917.817
5	4	812429	901.349
5	5	439130	662.669
5	6	413507	643.045
5	7	242822	492.77
5	8	254254	504.236
5	9	52427.5	228.971
6	2	2.29459e+06	1514.79
6	3	1.40687e+06	1186.12
6	4	636225	797.637
6	5	201826	449.251
6	6	107220	327.445
6	7	365022	604.17
6	8	115104	339.27
6	9	28381.8	168.469

## Sheet: wildflower floral density
site	weeks after bee release	sum(wildflowers)
2	2	0
2	3	0
2	4	8
2	5	445
2	6	4297
2	7	4270
2	8	5563
2	9	10768
4	2	0
4	3	0
4	4	0
4	5	107
4	6	1865
4	7	3474
4	8	4871
4	9	9606
6	2	0
6	3	0
6	4	1
6	5	711
6	6	2511
6	7	2279
6	8	4202
6	9	8364

## Sheet: pollen load composition
site	treatment	weeks after bee release	bee no.	total alfalfa pollen	total non-alfalfa pollen	total unidentifiable pollen	total identifiable pollen counted	% alfalfa pollen	% non-alfalfa pollen
1	no flower strip	2	301	100	0	0	100	100	0
1	no flower strip	2	302	82	18	0	100	82	18
1	no flower strip	2	303	2	98	0	100	2	98
1	no flower strip	2	304	1	93	6	94	1.06383	98.9362
1	no flower strip	2	305	96	3	1	99	96.9697	3.0303
1	no flower strip	2	306	70	30	0	100	70	30
1	no flower strip	2	307	85	14	1	99	85.8586	14.1414
1	no flower strip	2	308	98	1	1	99	98.9899	1.0101
1	no flower strip	2	309	100	0	0	100	100	0
1	no flower strip	2	310	99	0	1	99	100	0
2	flower strip	2	311	100	0	0	100	100	0
2	flower strip	2	312	100	0	0	100	100	0
2	flower strip	2	313	0	94	4	94	0	100
2	flower strip	2	314	1	99	0	100	1	99
2	flower strip	2	315	0	92	8	92	0	100
2	flower strip	2	316	99	1	0	100	99	1
2	flower strip	2	317	7	88	5	95	7.36842	92.6316
2	flower strip	2	318	61	38	1	99	61.6162	38.3838
2	flower strip	2	319	100	0	0	100	100	0
2	flower strip	2	320	90	10	0	100	90	10
3	no flower strip	2	321	98	1	1	99	98.9899	1.0101
3	no flower strip	2	322	99	1	0	100	99	1
3	no flower strip	2	323	37	62	1	99	37.3737	62.6263
3	no flower strip	2	324	97	3	0	100	97	3
3	no flower strip	2	325	98	2	0	100	98	2
3	no flower strip	2	326	100	0	0	100	100	0
3	no flower strip	2	327	99	1	0	100	99	1
3	no flower strip	2	328	46	54	0	100	46	54
3	no flower strip	2	329	82	18	0	100	82	18
3	no flower strip	2	330	33	65	2	98	33.6735	66.3265
4	flower strip	2	331	11	89	0	100	11	89
4	flower strip	2	332	99	1	0	100	99	1
4	flower strip	2	333	92	8	0	100	92	8
4	flower strip	2	334	99	1	0	100	99	1
4	flower strip	2	335	100	0	0	100	100	0
4	flower strip	2	336	14	86	0	100	14	86
4	flower strip	2	337	99	0	1	99	100	0
4	flower strip	2	338	99	0	1	99	100	0
4	flower strip	2	339	100	0	0	100	100	0
4	flower strip	2	340	99	0	1	99	100	0
5	no flower strip	2	341	78	22	0	100	78	22
5	no flower strip	2	342	97	2	1	99	97.9798	2.0202
5	no flower strip	2	343	99	0	1	99	100	0
5	no flower strip	2	344	100	0	0	100	100	0
5	no flower strip	2	345	99	0	1	99	100	0
5	no flower strip	2	346	93	6	1	99	93.9394	6.06061
5	no flower strip	2	347	0	93	8	93	0	100
5	no flower strip	2	348	99	0	1	99	100	0
5	no flower strip	2	349	97	2	1	99	97.9798	2.0202
5	no flower strip	2	350	31	63	6	94	32.9787	67.0213
6	flower strip	2	351	98	1	1	99	98.9899	1.0101
6	flower strip	2	352	6	93	1	99	6.06061	93.9394
6	flower strip	2	353	97	3	0	100	97	3
6	flower strip	2	354	0	100	0	100	0	100
6	flower strip	2	355	2	98	0	100	2	98
6	flower strip	2	356	99	0	1	99	100	0
6	flower strip	2	357	97	2	1	99	97.9798	2.0202
6	flower strip	2	358	96	3	1	99	96.9697	3.0303
6	flower strip	2	359	0	98	2	98	0	100
6	flower strip	2	360	18	82	0	100	18	82
1	no flower strip	3	361	100	0	0	100	100	0
1	no flower strip	3	362	97	2	1	99	97.9798	2.0202
1	no flower strip	3	363	95	2	3	97	97.9381	2.06186
1	no flower strip	3	364	100	0	0	100	100	0
1	no flower strip	3	365	100	0	0	100	100	0
1	no flower strip	3	366	100	0	0	100	100	0
1	no flower strip	3	367	99	1	0	100	99	1
1	no flower strip	3	368	99	1	0	100	99	1
1	no flower strip	3	369	100	0	0	100	100	0
1	no flower strip	3	370	97	1	2	98	98.9796	1.02041
2	flower strip	3	371	100	0	0	100	100	0
2	flower strip	3	372	100	0	0	100	100	0
2	flower strip	3	373	2	98	0	100	2	98
2	flower strip	3	374	7	93	0	100	7	93
2	flower strip	3	375	100	0	0	100	100	0
2	flower strip	3	376	87	11	2	98	88.7755	11.2245
2	flower strip	3	377	18	76	6	94	19.1489	80.8511
2	flower strip	3	378	94	4	2	98	95.9184	4.08163
2	flower strip	3	379	100	0	0	100	100	0
2	flower strip	3	380	99	0	1	99	100	0
3	no flower strip	3	381	87	10	3	97	89.6907	10.3093
3	no flower strip	3	382	99	1	0	100	99	1
3	no flower strip	3	383	98	0	2	98	100	0
3	no flower strip	3	384	99	0	1	99	100	0
3	no flower strip	3	385	99	0	1	99	100	0
3	no flower strip	3	386	98	1	1	99	98.9899	1.0101
3	no flower strip	3	387	100	0	0	100	100	0
3	no flower strip	3	388	99	1	0	100	99	1
3	no flower strip	3	389	99	0	1	99	100	0
3	no flower strip	3	390	97	1	2	98	98.9796	1.02041
4	flower strip	3	391	48	43	9	91	52.7473	47.2527
4	flower strip	3	392	98	0	2	98	100	0
4	flower strip	3	393	1	97	2	98	1.02041	98.9796
4	flower strip	3	394	96	3	1	99	96.9697	3.0303
4	flower strip	3	395	98	0	2	98	100	0
4	flower strip	3	396	99	1	0	100	99	1
4	flower strip	3	397	99	1	0	100	99	1
4	flower strip	3	398	95	2	3	97	97.9381	2.06186
4	flower strip	3	399	89	10	1	99	89.899	10.101
4	flower strip	3	400	42	58	0	100	42	58
5	no flower strip	3	401	0	100	0	100	0	100
5	no flower strip	3	402	50	47	3	97	51.5464	48.4536
5	no flower strip	3	403	18	76	6	94	19.1489	80.8511
5	no flower strip	3	404	0	98	2	98	0	100
5	no flower strip	3	405	4	90	6	94	4.25532	95.7447
5	no flower strip	3	406	20	80	0	100	20	80
5	no flower strip	3	407	0	96	4	96	0	100
5	no flower strip	3	408	100	0	0	100	100	0
5	no flower strip	3	409	99	1	0	100	99	1
5	no flower strip	3	410	2	93	5	95	2.10526	97.8947
6	flower strip	3	411	2	98	0	100	2	98
6	flower strip	3	412	0	100	4	100	0	100
6	flower strip	3	413	27	59	4	86	31.3953	68.6047
6	flower strip	3	414	90	9	1	99	90.9091	9.09091
6	flower strip	3	415	98	2	0	100	98	2
6	flower strip	3	416	92	3	5	95	96.8421	3.15789
6	flower strip	3	417	1	96	3	97	1.03093	98.9691
6	flower strip	3	418	98	1	1	99	98.9899	1.0101
6	flower strip	3	419	100	0	0	100	100	0
6	flower strip	3	420	99	0	1	99	100	0
1	no flower strip	4	421	97	2	1	99	97.9798	2.0202
1	no flower strip	4	422	98	2	0	100	98	2
1	no flower strip	4	423	97	2	1	99	97.9798	2.0202
1	no flower strip	4	424	98	2	0	100	98	2
1	no flower strip	4	425	98	1	1	99	98.9899	1.0101
1	no flower strip	4	426	99	0	1	99	100	0
1	no flower strip	4	427	100	0	0	100	100	0
1	no flower strip	4	428	6	94	0	100	6	94
1	no flower strip	4	429	36	62	2	98	36.7347	63.2653
1	no flower strip	4	430	99	0	1	99	100	0
2	flower strip	4	431	95	3	2	98	96.9388	3.06122
2	flower strip	4	432	100	0	0	100	100	0
2	flower strip	4	433	97	2	1	99	97.9798	2.0202
2	flower strip	4	434	85	15	0	100	85	15
2	flower strip	4	435	98	1	1	99	98.9899	1.0101
2	flower strip	4	436	8	92	0	100	8	92
2	flower strip	4	437	100	0	0	100	100	0
2	flower strip	4	438	96	4	0	100	96	4
2	flower strip	4	439	45	54	1	99	45.4545	54.5455
2	flower strip	4	440	99	0	1	99	100	0
3	no flower strip	4	441	97	3	0	100	97	3
3	no flower strip	4	442	98	1	1	99	98.9899	1.0101
3	no flower strip	4	443	97	1	2	98	98.9796	1.02041
3	no flower strip	4	444	86	12	2	98	87.7551	12.2449
3	no flower strip	4	445	99	1	0	100	99	1
3	no flower strip	4	446	94	4	2	98	95.9184	4.08163
3	no flower strip	4	447	95	2	3	97	97.9381	2.06186
3	no flower strip	4	448	95	2	3	97	97.9381	2.06186
3	no flower strip	4	449	100	0	0	100	100	0
3	no flower strip	4	450	100	0	0	100	100	0
4	flower strip	4	451	99	0	1	99	100	0
4	flower strip	4	452	76	19	5	95	80	20
4	flower strip	4	453	99	1	0	100	99	1
4	flower strip	4	454	100	0	0	100	100	0
4	flower strip	4	455	100	0	0	100	100	0
4	flower strip	4	456	97	3	0	100	97	3
4	flower strip	4	457	100	0	0	100	100	0
4	flower strip	4	458	98	2	0	100	98	2
4	flower strip	4	459	98	1	1	99	98.9899	1.0101
4	flower strip	4	460	18	80	2	98	18.3673	81.6327
5	no flower strip	4	461	100	0	0	100	100	0
5	no flower strip	4	462	99	0	1	99	100	0
5	no flower strip	4	463	99	0	1	99	100	0
5	no flower strip	4	464	35	63	2	98	35.7143	64.2857
5	no flower strip	4	465	99	1	0	100	99	1
5	no flower strip	4	466	100	0	0	100	100	0
5	no flower strip	4	467	45	54	1	99	45.4545	54.5455
5	no flower strip	4	468	99	0	1	99	100	0
5	no flower strip	4	469	96	4	0	100	96	4
5	no flower strip	4	470	97	1	2	98	98.9796	1.02041
6	flower strip	4	471	95	2	3	97	97.9381	2.06186
6	flower strip	4	472	68	32	0	100	68	32
6	flower strip	4	473	91	9	0	100	91	9
6	flower strip	4	474	99	1	0	100	99	1
6	flower strip	4	475	15	81	4	96	15.625	84.375
6	flower strip	4	476	84	16	0	100	84	16
6	flower strip	4	477	51	44	5	95	53.6842	46.3158
6	flower strip	4	478	59	39	2	98	60.2041	39.7959
6	flower strip	4	479	97	3	0	100	97	3
6	flower strip	4	480	94	5	1	99	94.9495	5.05051
1	no flower strip	5	481	100	0	0	100	100	0
1	no flower strip	5	482	98	0	2	98	100	0
1	no flower strip	5	483	98	2	0	100	98	2
1	no flower strip	5	484	96	0	4	96	100	0
1	no flower strip	5	485	98	1	1	99	98.9899	1.0101
1	no flower strip	5	486	97	1	2	98	98.9796	1.02041
1	no flower strip	5	487	93	2	5	95	97.8947	2.10526
1	no flower strip	5	488	98	2	0	100	98	2
1	no flower strip	5	489	95	2	3	97	97.9381	2.06186
1	no flower strip	5	490	100	0	0	100	100	0
2	flower strip	5	491	98	1	1	99	98.9899	1.0101
2	flower strip	5	492	96	3	1	99	96.9697	3.0303
2	flower strip	5	493	96	2	2	98	97.9592	2.04082
2	flower strip	5	494	98	1	1	99	98.9899	1.0101
2	flower strip	5	495	97	3	0	100	97	3
2	flower strip	5	496	100	0	0	100	100	0
2	flower strip	5	497	67	33	0	100	67	33
2	flower strip	5	498	99	0	1	99	100	0
2	flower strip	5	499	99	1	0	100	99	1
2	flower strip	5	500	99	1	0	100	99	1
3	no flower strip	5	501	96	3	1	99	96.9697	3.0303
3	no flower strip	5	502	98	2	0	100	98	2
3	no flower strip	5	503	92	7	1	99	92.9293	7.07071
3	no flower strip	5	504	98	0	2	98	100	0
3	no flower strip	5	505	97	3	0	100	97	3
3	no flower strip	5	506	71	29	0	100	71	29
3	no flower strip	5	507	93	6	1	99	93.9394	6.06061
3	no flower strip	5	508	70	28	2	98	71.4286	28.5714
3	no flower strip	5	509	36	61	3	97	37.1134	62.8866
3	no flower strip	5	510	95	2	3	97	97.9381	2.06186
4	flower strip	5	511	98	1	1	99	98.9899	1.0101
4	flower strip	5	512	100	0	0	100	100	0
4	flower strip	5	513	99	0	1	99	100	0
4	flower strip	5	514	99	0	1	99	100	0
4	flower strip	5	515	99	1	0	100	99	1
4	flower strip	5	516	100	0	0	100	100	0
4	flower strip	5	517	98	0	2	98	100	0
4	flower strip	5	518	99	0	1	99	100	0
4	flower strip	5	519	94	2	4	96	97.9167	2.08333
4	flower strip	5	520	99	1	0	100	99	1
5	no flower strip	5	521	57	43	0	100	57	43
5	no flower strip	5	522	98	1	1	99	98.9899	1.0101
5	no flower strip	5	523	6	94	0	100	6	94
5	no flower strip	5	524	98	1	1	99	98.9899	1.0101
5	no flower strip	5	525	37	58	5	95	38.9474	61.0526
5	no flower strip	5	526	94	3	3	97	96.9072	3.09278
5	no flower strip	5	527	98	1	1	99	98.9899	1.0101
5	no flower strip	5	528	98	0	2	98	100	0
5	no flower strip	5	529	2	96	2	98	2.04082	97.9592
5	no flower strip	5	530	93	5	2	98	94.898	5.10204
6	flower strip	5	531	99	1	0	100	99	1
6	flower strip	5	532	99	1	0	100	99	1
6	flower strip	5	533	99	0	1	99	100	0
6	flower strip	5	534	100	0	0	100	100	0
6	flower strip	5	535	98	1	1	99	98.9899	1.0101
6	flower strip	5	536	100	0	0	100	100	0
6	flower strip	5	537	9	79	12	88	10.2273	89.7727
6	flower strip	5	538	11	86	3	97	11.3402	88.6598
6	flower strip	5	539	97	1	2	98	98.9796	1.02041
6	flower strip	5	540	90	8	2	98	91.8367	8.16327
1	no flower strip	6	541	97	2	1	99	97.9798	2.0202
1	no flower strip	6	542	92	3	5	95	96.8421	3.15789
1	no flower strip	6	543	96	4	0	100	96	4
1	no flower strip	6	544	93	6	1	99	93.9394	6.06061
1	no flower strip	6	545	98	1	1	99	98.9899	1.0101
1	no flower strip	6	546	3	89	8	92	3.26087	96.7391
1	no flower strip	6	547	46	53	1	99	46.4646	53.5354
1	no flower strip	6	548	94	3	3	97	96.9072	3.09278
1	no flower strip	6	549	99	1	0	100	99	1
1	no flower strip	6	550	99	1	0	100	99	1
2	flower strip	6	551	98	1	1	99	98.9899	1.0101
2	flower strip	6	552	98	1	1	99	98.9899	1.0101
2	flower strip	6	553	94	2	4	96	97.9167	2.08333
2	flower strip	6	554	43	55	2	98	43.8776	56.1224
2	flower strip	6	555	16	80	4	96	16.6667	83.3333
2	flower strip	6	556	94	4	2	98	95.9184	4.08163
2	flower strip	6	557	40	56	4	96	41.6667	58.3333
2	flower strip	6	558	98	1	1	99	98.9899	1.0101
2	flower strip	6	559	97	0	3	97	100	0
2	flower strip	6	560	8	87	5	95	8.42105	91.5789
3	no flower strip	6	561	99	1	0	100	99	1
3	no flower strip	6	562	98	0	2	98	100	0
3	no flower strip	6	563	98	0	2	98	100	0
3	no flower strip	6	564	83	15	2	98	84.6939	15.3061
3	no flower strip	6	565	98	2	0	100	98	2
3	no flower strip	6	566	96	1	3	97	98.9691	1.03093
3	no flower strip	6	567	97	3	0	100	97	3
3	no flower strip	6	568	96	1	3	97	98.9691	1.03093
3	no flower strip	6	569	99	1	0	100	99	1
3	no flower strip	6	570	97	3	0	100	97	3
4	flower strip	6	571	100	0	0	100	100	0
4	flower strip	6	572	72	26	2	98	73.4694	26.5306
4	flower strip	6	573	100	0	0	100	100	0
4	flower strip	6	574	96	1	3	97	98.9691	1.03093
4	flower strip	6	575	98	1	1	99	98.9899	1.0101
4	flower strip	6	576	91	5	4	96	94.7917	5.20833
4	flower strip	6	577	97	2	1	99	97.9798	2.0202
4	flower strip	6	578	98	2	0	100	98	2
4	flower strip	6	579	99	0	1	99	100	0
4	flower strip	6	580	97	1	2	98	98.9796	1.02041
5	no flower strip	6	581	98	1	1	99	98.9899	1.0101
5	no flower strip	6	582	94	2	4	96	97.9167	2.08333
5	no flower strip	6	583	8	87	5	95	8.42105	91.5789
5	no flower strip	6	584	97	2	1	99	97.9798	2.0202
5	no flower strip	6	585	99	0	1	99	100	0
5	no flower strip	6	586	74	25	1	99	74.7475	25.2525
5	no flower strip	6	587	97	2	1	99	97.9798	2.0202
5	no flower strip	6	588	44	55	1	99	44.4444	55.5556
5	no flower strip	6	589	98	1	1	99	98.9899	1.0101
5	no flower strip	6	590	98	1	1	99	98.9899	1.0101
6	flower strip	6	591	29	69	2	98	29.5918	70.4082
6	flower strip	6	592	68	26	6	94	72.3404	27.6596
6	flower strip	6	593	97	3	0	100	97	3
6	flower strip	6	594	99	0	1	99	100	0
6	flower strip	6	595	86	11	3	97	88.6598	11.3402
6	flower strip	6	596	99	0	1	99	100	0
6	flower strip	6	597	98	0	2	98	100	0
6	flower strip	6	598	99	1	0	100	99	1
6	flower strip	6	599	64	33	3	97	65.9794	34.0206
6	flower strip	6	600	16	69	15	85	18.8235	81.1765
1	no flower strip	7	601	99	0	1	99	100	0
1	no flower strip	7	602	97	0	3	97	100	0
1	no flower strip	7	603	90	10	0	100	90	10
1	no flower strip	7	604	99	0	1	99	100	0
2	flower strip	7	605	79	19	2	98	80.6122	19.3878
2	flower strip	7	606	100	0	0	100	100	0
2	flower strip	7	607	95	4	1	99	95.9596	4.0404
3	no flower strip	7	608	95	2	3	97	97.9381	2.06186
3	no flower strip	7	609	44	55	1	99	44.4444	55.5556
3	no flower strip	7	610	12	74	14	86	13.9535	86.0465
3	no flower strip	7	611	97	2	1	99	97.9798	2.0202
4	flower strip	7	612	3	94	3	97	3.09278	96.9072
4	flower strip	7	613	94	4	2	98	95.9184	4.08163
5	no flower strip	7	614	92	7	1	99	92.9293	7.07071
5	no flower strip	7	615	15	78	7	93	16.129	83.871
5	no flower strip	7	616	97	2	1	99	97.9798	2.0202
5	no flower strip	7	617	98	0	2	98	100	0
5	no flower strip	7	618	99	0	1	99	100	0
5	no flower strip	7	619	100	0	0	100	100	0
6	flower strip	7	620	93	5	2	98	94.898	5.10204
1	no flower strip	8	621	99	1	0	100	99	1
1	no flower strip	8	622	91	7	2	98	92.8571	7.14286
1	no flower strip	8	623	100	0	0	100	100	0
1	no flower strip	8	624	99	1	0	100	99	1
1	no flower strip	8	625	98	1	1	99	98.9899	1.0101
2	flower strip	8	626	85	14	1	99	85.8586	14.1414
2	flower strip	8	627	16	78	6	94	17.0213	82.9787
2	flower strip	8	628	95	3	2	98	96.9388	3.06122
2	flower strip	8	629	95	0	5	95	100	0
2	flower strip	8	630	98	1	1	99	98.9899	1.0101
3	no flower strip	8	631	100	0	0	100	100	0
3	no flower strip	8	632	99	0	1	99	100	0
3	no flower strip	8	633	95	3	2	98	96.9388	3.06122
3	no flower strip	8	634	100	0	0	100	100	0
3	no flower strip	8	635	86	13	1	99	86.8687	13.1313
3	no flower strip	8	636	8	92	0	100	8	92
4	flower strip	8	637	100	0	0	100	100	0
5	no flower strip	8	638	97	3	0	100	97	3
5	no flower strip	8	639	97	0	3	97	100	0
5	no flower strip	8	640	21	69	10	90	23.3333	76.6667
5	no flower strip	8	641	99	0	1	99	100	0
5	no flower strip	8	642	90	7	3	97	92.7835	7.21649
6	flower strip	8	643	91	8	1	99	91.9192	8.08081
6	flower strip	8	644	32	64	4	96	33.3333	66.6667
6	flower strip	8	645	86	12	2	98	87.7551	12.2449
6	flower strip	8	646	98	1	1	99	98.9899	1.0101
6	flower strip	8	647	96	4	0	100	96	4
6	flower strip	8	648	94	4	2	98	95.9184	4.08163
6	flower strip	8	649	98	2	0	100	98	2
1	no flower strip	9	650	99	0	1	99	100	0
1	no flower strip	9	651	93	5	2	98	94.898	5.10204
1	no flower strip	9	652	99	1	0	100	99	1
1	no flower strip	9	653	97	1	2	98	98.9796	1.02041
1	no flower strip	9	654	99	1	0	100	99	1
1	no flower strip	9	655	99	1	0	100	99	1
2	flower strip	9	656	96	3	1	99	96.9697	3.0303
2	flower strip	9	657	100	0	0	100	100	0
2	flower strip	9	658	76	24	3	100	76	24
2	flower strip	9	659	0	100	0	100	0	100
2	flower strip	9	660	98	0	2	98	100	0
3	no flower strip	9	661	99	0	1	99	100	0
3	no flower strip	9	662	80	19	1	99	80.8081	19.1919
5	no flower strip	9	663	27	73	0	100	27	73
5	no flower strip	9	664	81	14	5	95	85.2632	14.7368
5	no flower strip	9	665	100	0	0	100	100	0
5	no flower strip	9	666	90	9	1	99	90.9091	9.09091
6	flower strip	9	667	62	37	1	99	62.6263	37.3737

## Sheet: offspring production-bee cells
site	treatment	weeks after bee release	number nests	sqrt(number nests)	weight all bee cells (g)	number bee cells	sqrt(number bee cells)	mean(open and new+old tripped flowers per plot)	sqrt(mean (open and new+old tripped flowers per plot))	shelter orientation (degrees)
1	no flower strip	2	355	18.8414	310.56	3956.18	62.8982	2.80152e+06	1673.77	35
1	no flower strip	3	631	25.1197	500.29	6373.12	79.8318	2.0837e+06	1443.5	35
1	no flower strip	4	460	21.4476	315.67	4021.27	63.4135	1.29886e+06	1139.68	35
1	no flower strip	5	452	21.2603	274.45	3496.18	59.1285	811641	900.911	35
1	no flower strip	6	201	14.1774	89.28	1137.32	33.7242	129295	359.576	35
1	no flower strip	7	98	9.89949	35.49	452.102	21.2627	257013	506.965	35
1	no flower strip	8	30	5.47723	10.78	137.325	11.7186	219959	468.998	35
1	no flower strip	9	51	7.14143	30.93	394.013	19.8498	150581	388.048	35
2	flower strip	2	507	22.5167	389.72	4964.59	70.4598	1.66112e+06	1288.85	100
2	flower strip	3	659	25.671	467	5949.04	77.13	1.34932e+06	1161.6	100
2	flower strip	4	488	22.0907	300.38	3826.5	61.8587	478549	691.772	100
2	flower strip	5	388	19.6977	216.81	2761.91	52.5539	514420	717.231	100
2	flower strip	6	153	12.3693	67.01	853.631	29.217	650416	806.484	100
2	flower strip	7	101	10.0499	42.15	536.943	23.172	583798	764.067	100
2	flower strip	8	17	4.12311	7.83	99.7452	9.98725	187241	432.714	100
2	flower strip	9	47	6.85565	30.56	389.299	19.7307	111162	333.41	100
3	no flower strip	2	360	18.9737	316.33	4029.68	63.4798	1.00282e+06	1001.41	10
3	no flower strip	3	633	25.1595	527.39	6718.34	81.9655	882595	939.465	10
3	no flower strip	4	518	22.7596	371.15	4728.03	68.7606	259378	509.292	10
3	no flower strip	5	433	20.8087	249.06	3172.74	56.3271	13402.5	115.769	10
3	no flower strip	6	235	15.3297	94.69	1206.24	34.731	42572.7	206.332	10
3	no flower strip	7	87	9.32738	31.47	400.892	20.0223	11825.8	108.746	10
3	no flower strip	8	34	5.83095	11.67	148.662	12.1927	0	0	10
3	no flower strip	9	14	3.74166	5.68	72.3567	8.50627	0	0	10
4	flower strip	2	170	13.0384	136.19	1734.9	41.6522	1.53459e+06	1238.79	320
4	flower strip	3	559	23.6432	426.01	5426.88	73.6674	888508	942.607	320
4	flower strip	4	405	20.1246	261.1	3326.11	57.6725	216805	465.624	320
4	flower strip	5	398	19.9499	229.32	2921.27	54.0488	9066.41	95.2177	320
4	flower strip	6	250	15.8114	117	1490.45	38.6063	113527	336.938	320
4	flower strip	7	74	8.60233	28.36	361.274	19.0072	65435.8	255.804	320
4	flower strip	8	13	3.60555	5.37	68.4076	8.27089	56369.4	237.422	320
4	flower strip	9	5	2.23607	3.25	41.4013	6.43438	0	0	320
5	no flower strip	2	353	18.7883	263.7	3359.24	57.9589	2.82202e+06	1679.89	330
5	no flower strip	3	480	21.9089	326.65	4161.15	64.5069	842388	917.817	330
5	no flower strip	4	391	19.7737	222.2	2830.57	53.2031	812429	901.349	330
5	no flower strip	5	275	16.5831	139.85	1781.53	42.2082	439130	662.669	330
5	no flower strip	6	147	12.1244	63.4	807.643	28.4191	413507	643.045	330
5	no flower strip	7	58	7.61577	20.47	260.764	16.1482	242822	492.77	330
5	no flower strip	8	20	4.47214	8.55	108.917	10.4363	254254	504.236	330
5	no flower strip	9	39	6.245	20.21	257.452	16.0453	52427.5	228.971	330
6	flower strip	2	380	19.4936	312.99	3987.13	63.1438	2.29459e+06	1514.79	10
6	flower strip	3	577	24.0208	428.85	5463.06	73.9125	1.40687e+06	1186.12	10
6	flower strip	4	454	21.3073	260.42	3317.45	57.5973	636225	797.637	10
6	flower strip	5	300	17.3205	132.66	1689.94	41.1088	201826	449.251	10
6	flower strip	6	76	8.7178	28.03	357.07	18.8963	107220	327.445	10
6	flower strip	7	51	7.14143	17.32	220.637	14.8539	365022	604.17	10
6	flower strip	8	12	3.4641	5.87	74.7771	8.64737	115104	339.27	10
6	flower strip	9	34	5.83095	19.87	253.121	15.9098	28381.8	168.469	10

## Sheet: offspring emergence success
site	treatment	weeks after bee release	no. females	no. males	total adults	total bee cells reared	cells with offspring	% emergence success (cells with offspring)	prop emergence success (cells with offspring)	arcsine(prop emergence sucess (cells with offspring))	mean(open and new+old tripped flowers per plot)	sqrt(mean (open and new+old tripped flowers per plot))	shelter orientation (degrees)
1	no flower strip	2	131	111	242	250	249	97.1888	0.971888	1.33312	2.80152e+06	1673.77	35
1	no flower strip	3	174	72	246	251	251	98.008	0.98008	1.37086	2.0837e+06	1443.5	35
1	no flower strip	4	146	87	233	246	245	95.102	0.95102	1.25652	1.29886e+06	1139.68	35
1	no flower strip	5	126	109	235	249	247	95.1417	0.951417	1.25781	811641	900.911	35
1	no flower strip	6	131	104	235	250	246	95.5285	0.955285	1.27062	129295	359.576	35
1	no flower strip	7	45	31	76	82	81	93.8272	0.938272	1.2176	257013	506.965	35
1	no flower strip	8	38	35	73	79	79	92.4051	0.924051	1.17854	219959	468.998	35
1	no flower strip	9	44	18	62	80	79	78.481	0.78481	0.90239	150581	388.048	35
2	flower strip	2	143	107	250	253	253	98.8142	0.988142	1.41665	1.66112e+06	1288.85	100
2	flower strip	3	118	126	244	251	251	97.2112	0.972112	1.33407	1.34932e+06	1161.6	100
2	flower strip	4	122	120	242	250	248	97.5806	0.975806	1.35038	478549	691.772	100
2	flower strip	5	116	127	243	251	251	96.8127	0.968127	1.31764	514420	717.231	100
2	flower strip	6	104	121	225	248	248	90.7258	0.907258	1.13672	650416	806.484	100
2	flower strip	7	50	30	80	83	83	96.3855	0.963855	1.30111	583798	764.067	100
2	flower strip	8	27	41	68	81	81	83.9506	0.839506	0.996374	187241	432.714	100
2	flower strip	9	35	25	60	81	80	75	0.75	0.848062	111162	333.41	100
3	no flower strip	2	154	87	241	251	251	96.0159	0.960159	1.28757	1.00282e+06	1001.41	10
3	no flower strip	3	138	96	234	248	245	95.5102	0.955102	1.27	882595	939.465	10
3	no flower strip	4	143	93	236	251	251	94.0239	0.940239	1.22333	259378	509.292	10
3	no flower strip	5	130	104	234	246	246	95.122	0.95122	1.25716	13402.5	115.769	10
3	no flower strip	6	143	136	279	299	298	93.6242	0.936242	1.21178	42572.7	206.332	10
3	no flower strip	7	34	42	76	81	80	95	0.95	1.25324	11825.8	108.746	10
3	no flower strip	8	31	46	77	82	82	93.9024	0.939024	1.21978	0	0	10
3	no flower strip	9	25	18	43	61	60	71.6667	0.716667	0.799011	0	0	10
4	flower strip	2	130	122	252	260	259	97.2973	0.972973	1.33777	1.53459e+06	1238.79	320
4	flower strip	3	132	111	243	256	254	95.6693	0.956693	1.27542	888508	942.607	320
4	flower strip	4	130	115	245	260	258	94.9612	0.949612	1.252	216805	465.624	320
4	flower strip	5	129	100	229	249	247	92.7126	0.927126	1.18667	9066.41	95.2177	320
4	flower strip	6	119	108	227	250	249	91.1647	0.911647	1.14727	113527	336.938	320
4	flower strip	7	40	35	75	83	83	90.3614	0.903614	1.12813	65435.8	255.804	320
4	flower strip	8	25	30	55	63	63	87.3016	0.873016	1.06135	56369.4	237.422	320
4	flower strip	9	10	8	18	29	29	62.069	0.62069	0.669622	0	0	320
5	no flower strip	2	114	127	241	247	246	97.9675	0.979675	1.36883	2.82202e+06	1679.89	330
5	no flower strip	3	132	110	242	252	249	97.1888	0.971888	1.33312	842388	917.817	330
5	no flower strip	4	119	117	236	250	247	95.5466	0.955466	1.27123	812429	901.349	330
5	no flower strip	5	117	121	238	250	249	95.5823	0.955823	1.27245	439130	662.669	330
5	no flower strip	6	126	117	243	249	249	97.5904	0.975904	1.35082	413507	643.045	330
5	no flower strip	7	32	46	78	81	81	96.2963	0.962963	1.29778	242822	492.77	330
5	no flower strip	8	43	35	78	81	81	96.2963	0.962963	1.29778	254254	504.236	330
5	no flower strip	9	42	25	67	80	79	84.8101	0.848101	1.01239	52427.5	228.971	330
6	flower strip	2	134	96	230	240	239	96.2343	0.962343	1.29549	2.29459e+06	1514.79	10
6	flower strip	3	192	94	286	301	298	95.9732	0.959732	1.28605	1.40687e+06	1186.12	10
6	flower strip	4	156	75	231	241	238	97.0588	0.970588	1.32766	636225	797.637	10
6	flower strip	5	149	99	248	255	254	97.6378	0.976378	1.35301	201826	449.251	10
6	flower strip	6	106	130	236	252	251	94.0239	0.940239	1.22333	107220	327.445	10
6	flower strip	7	42	35	77	80	79	97.4684	0.974684	1.3453	365022	604.17	10
6	flower strip	8	27	29	56	67	66	84.8485	0.848485	1.01312	115104	339.27	10
6	flower strip	9	42	18	60	82	82	73.1707	0.731707	0.820823	28381.8	168.469	10

## Sheet: offspring mortality
site	treatment	weeks after bee release	total bee cells reared	cells with offspring	cells with dead offspring	egg	larva	prepupa	pupa	unemerged-F	unemerged-M	unemerged adults	chalkbrood	parasitoids	prop egg	prop larva	prop prepupa	prop pupa	prop unemerged adults	mean(open and new+old tripped flowers per plot)	sqrt(mean (open and new+old tripped flowers per plot))	shelter orientation (degrees)
1	no flower strip	2	250	249	7	1	1	1	0	0	0	0	3	1	0.142857	0.142857	0.142857	0	0	2.80152e+06	1673.77	35
1	no flower strip	3	251	251	5	0	1	0	1	0	0	0	2	1	0	0.2	0	0.2	0	2.0837e+06	1443.5	35
1	no flower strip	4	246	245	12	1	2	0	0	0	0	0	9	0	0.0833333	0.166667	0	0	0	1.29886e+06	1139.68	35
1	no flower strip	5	249	247	12	0	2	0	0	0	0	0	10	0	0	0.166667	0	0	0	811641	900.911	35
1	no flower strip	6	250	246	11	1	2	2	3	0	0	0	3	0	0.0909091	0.181818	0.181818	0.272727	0	129295	359.576	35
1	no flower strip	7	82	81	5	0	2	1	0	0	0	0	2	0	0	0.4	0.2	0	0	257013	506.965	35
1	no flower strip	8	79	79	6	0	5	0	0	0	0	0	1	0	0	0.833333	0	0	0	219959	468.998	35
1	no flower strip	9	80	79	17	0	14	1	2	0	0	0	0	0	0	0.823529	0.0588235	0.117647	0	150581	388.048	35
2	flower strip	2	253	253	3	0	1	0	0	0	0	0	2	0	0	0.333333	0	0	0	1.66112e+06	1288.85	100
2	flower strip	3	251	251	7	0	1	1	2	0	0	0	3	0	0	0.142857	0.142857	0.285714	0	1.34932e+06	1161.6	100
2	flower strip	4	250	248	6	0	1	1	0	0	0	0	4	0	0	0.166667	0.166667	0	0	478549	691.772	100
2	flower strip	5	251	251	8	0	0	4	2	0	0	0	2	0	0	0	0.5	0.25	0	514420	717.231	100
2	flower strip	6	248	248	23	0	1	2	10	1	1	2	8	0	0	0.0434783	0.0869565	0.434783	0.0869565	650416	806.484	100
2	flower strip	7	83	83	3	0	0	1	1	0	0	0	1	0	0	0	0.333333	0.333333	0	583798	764.067	100
2	flower strip	8	81	81	13	0	5	4	1	0	0	0	3	0	0	0.384615	0.307692	0.0769231	0	187241	432.714	100
2	flower strip	9	81	80	20	0	16	4	0	0	0	0	0	0	0	0.8	0.2	0	0	111162	333.41	100
3	no flower strip	2	251	251	10	1	4	1	0	0	1	1	3	0	0.1	0.4	0.1	0	0.1	1.00282e+06	1001.41	10
3	no flower strip	3	248	245	11	0	0	3	1	0	1	1	6	0	0	0	0.272727	0.0909091	0.0909091	882595	939.465	10
3	no flower strip	4	251	251	15	1	0	1	3	0	0	0	10	0	0.0666667	0	0.0666667	0.2	0	259378	509.292	10
3	no flower strip	5	246	246	12	1	1	3	0	0	1	1	6	0	0.0833333	0.0833333	0.25	0	0.0833333	13402.5	115.769	10
3	no flower strip	6	299	298	19	0	4	3	0	0	1	1	11	0	0	0.210526	0.157895	0	0.0526316	42572.7	206.332	10
3	no flower strip	7	81	80	4	0	2	0	1	0	0	0	1	0	0	0.5	0	0.25	0	11825.8	108.746	10
3	no flower strip	8	82	82	5	0	2	1	0	0	0	0	2	0	0	0.4	0.2	0	0	0	0	10
3	no flower strip	9	61	60	17	3	13	0	0	0	0	0	1	0	0.176471	0.764706	0	0	0	0	0	10
4	flower strip	2	260	259	7	0	4	1	0	0	0	0	1	1	0	0.571429	0.142857	0	0	1.53459e+06	1238.79	320
4	flower strip	3	256	254	11	0	3	1	1	0	0	0	5	1	0	0.272727	0.0909091	0.0909091	0	888508	942.607	320
4	flower strip	4	260	258	13	0	1	4	1	0	1	1	5	1	0	0.0769231	0.307692	0.0769231	0.0769231	216805	465.624	320
4	flower strip	5	249	247	18	0	5	3	3	0	0	0	3	4	0	0.277778	0.166667	0.166667	0	9066.41	95.2177	320
4	flower strip	6	250	249	22	1	3	5	1	0	0	0	4	8	0.0454545	0.136364	0.227273	0.0454545	0	113527	336.938	320
4	flower strip	7	83	83	8	0	0	3	1	0	0	0	1	3	0	0	0.375	0.125	0	65435.8	255.804	320
4	flower strip	8	63	63	8	0	3	1	0	0	1	1	0	3	0	0.375	0.125	0	0.125	56369.4	237.422	320
4	flower strip	9	29	29	11	0	8	1	0	0	0	0	1	1	0	0.727273	0.0909091	0	0	0	0	320
5	no flower strip	2	247	246	5	0	2	0	2	0	1	1	0	0	0	0.4	0	0.4	0.2	2.82202e+06	1679.89	330
5	no flower strip	3	252	249	7	1	2	0	2	0	0	0	2	0	0.142857	0.285714	0	0.285714	0	842388	917.817	330
5	no flower strip	4	250	247	11	0	3	2	5	0	0	0	1	0	0	0.272727	0.181818	0.454545	0	812429	901.349	330
5	no flower strip	5	250	249	11	0	2	1	6	1	0	1	1	0	0	0.181818	0.0909091	0.545455	0.0909091	439130	662.669	330
5	no flower strip	6	249	249	6	0	0	1	4	0	0	0	1	0	0	0	0.166667	0.666667	0	413507	643.045	330
5	no flower strip	7	81	81	3	0	2	1	0	0	0	0	0	0	0	0.666667	0.333333	0	0	242822	492.77	330
5	no flower strip	8	81	81	3	0	1	2	0	0	0	0	0	0	0	0.333333	0.666667	0	0	254254	504.236	330
5	no flower strip	9	80	79	12	1	9	1	1	0	0	0	0	0	0.0833333	0.75	0.0833333	0.0833333	0	52427.5	228.971	330
6	flower strip	2	240	239	9	0	4	0	4	0	0	0	1	0	0	0.444444	0	0.444444	0	2.29459e+06	1514.79	10
6	flower strip	3	301	298	12	0	7	2	2	0	1	1	0	0	0	0.583333	0.166667	0.166667	0.0833333	1.40687e+06	1186.12	10
6	flower strip	4	241	238	7	0	4	0	2	0	0	0	1	0	0	0.571429	0	0.285714	0	636225	797.637	10
6	flower strip	5	255	254	6	0	0	2	1	0	1	1	2	0	0	0	0.333333	0.166667	0.166667	201826	449.251	10
6	flower strip	6	252	251	15	0	5	4	3	0	0	0	2	1	0	0.333333	0.266667	0.2	0	107220	327.445	10
6	flower strip	7	80	79	2	0	1	1	0	0	0	0	0	0	0	0.5	0.5	0	0	365022	604.17	10
6	flower strip	8	67	66	10	1	6	1	2	0	0	0	0	0	0.1	0.6	0.1	0.2	0	115104	339.27	10
6	flower strip	9	82	82	22	0	15	4	3	0	0	0	0	0	0	0.681818	0.181818	0.136364	0	28381.8	168.469	10

## Sheet: offspring condition
vial no.	site	treatment	weeks after bee release	sex	initial body weight	final body weight	lipid mass (mg)	lipid mass (ug)	percent body lipids	proportion body lipids	head width (mm)	sqrt(head width-mm)	mean(open and new+old tripped flowers per plot)	sqrt(mean (open and new+old tripped flowers per plot))	shelter orientation (degrees)
1	1	no flower strip	2	F	0.0141	0.0128	0.0013	13	9.21986	0.0921986	3.28	1.81108	2.80152e+06	1673.77	35
2	1	no flower strip	2	F	0.0133	0.0114	0.0019	19	14.2857	0.142857	3.12	1.76635	2.80152e+06	1673.77	35
3	1	no flower strip	2	F	0.0135	0.0112	0.0023	23	17.037	0.17037	3.12	1.76635	2.80152e+06	1673.77	35
4	1	no flower strip	2	F	0.0138	0.0114	0.0024	24	17.3913	0.173913	3.2	1.78885	2.80152e+06	1673.77	35
5	1	no flower strip	2	F	0.0162	0.0136	0.0026	26	16.0494	0.160494	3.32	1.82209	2.80152e+06	1673.77	35
6	1	no flower strip	2	F	0.0159	0.0137	0.0022	22	13.8365	0.138365	3.36	1.83303	2.80152e+06	1673.77	35
7	1	no flower strip	2	F	0.0154	0.0135	0.0019	19	12.3377	0.123377	3.32	1.82209	2.80152e+06	1673.77	35
8	1	no flower strip	2	F	0.0146	0.0129	0.0017	17	11.6438	0.116438	3.28	1.81108	2.80152e+06	1673.77	35
9	1	no flower strip	3	F	0.0174	0.0139	0.0035	35	20.1149	0.201149	3.36	1.83303	2.0837e+06	1443.5	35
10	1	no flower strip	3	F	0.0161	0.0132	0.0029	29	18.0124	0.180124	3.32	1.82209	2.0837e+06	1443.5	35
11	1	no flower strip	3	F	0.0141	0.0124	0.0017	17	12.0567	0.120567	3.2	1.78885	2.0837e+06	1443.5	35
12	1	no flower strip	3	F	0.0158	0.0133	0.0025	25	15.8228	0.158228	3.32	1.82209	2.0837e+06	1443.5	35
13	1	no flower strip	3	F	0.0155	0.0124	0.0031	31	20	0.2	3.24	1.8	2.0837e+06	1443.5	35
14	1	no flower strip	3	F	0.0122	0.0102	0.002	20	16.3934	0.163934	3.08	1.75499	2.0837e+06	1443.5	35
15	1	no flower strip	3	F	0.0145	0.0124	0.0021	21	14.4828	0.144828	3.24	1.8	2.0837e+06	1443.5	35
16	1	no flower strip	3	F	0.0112	0.0098	0.0014	14	12.5	0.125	3	1.73205	2.0837e+06	1443.5	35
17	1	no flower strip	4	F	0.0102	0.0087	0.0015	15	14.7059	0.147059	2.96	1.72047	1.29886e+06	1139.68	35
18	1	no flower strip	4	F	0.0128	0.0119	0.0009	9	7.03125	0.0703125	3.2	1.78885	1.29886e+06	1139.68	35
19	1	no flower strip	4	F	0.0135	0.0119	0.0016	16	11.8519	0.118519	3.2	1.78885	1.29886e+06	1139.68	35
20	1	no flower strip	4	F	0.0132	0.0109	0.0023	23	17.4242	0.174242	3.12	1.76635	1.29886e+06	1139.68	35
21	1	no flower strip	4	F	0.0131	0.0119	0.0012	12	9.16031	0.0916031	3.16	1.77764	1.29886e+06	1139.68	35
22	1	no flower strip	4	F	0.014	0.0125	0.0015	15	10.7143	0.107143	3.16	1.77764	1.29886e+06	1139.68	35
23	1	no flower strip	4	F	0.0138	0.013	0.0008	8	5.7971	0.057971	3.24	1.8	1.29886e+06	1139.68	35
24	1	no flower strip	4	F	0.0132	0.0115	0.0017	17	12.8788	0.128788	3.2	1.78885	1.29886e+06	1139.68	35
25	1	no flower strip	5	F	0.017	0.0138	0.0032	32	18.8235	0.188235	3.32	1.82209	811641	900.911	35
26	1	no flower strip	5	F	0.015	0.0131	0.0019	19	12.6667	0.126667	3.28	1.81108	811641	900.911	35
27	1	no flower strip	5	F	0.0147	0.0123	0.0024	24	16.3265	0.163265	3.24	1.8	811641	900.911	35
28	1	no flower strip	5	F	0.0146	0.0129	0.0017	17	11.6438	0.116438	3.24	1.8	811641	900.911	35
29	1	no flower strip	5	F	0.0125	0.0107	0.0018	18	14.4	0.144	3.12	1.76635	811641	900.911	35
30	1	no flower strip	5	F	0.0159	0.013	0.0029	29	18.239	0.18239	3.24	1.8	811641	900.911	35
31	1	no flower strip	5	F	0.0139	0.012	0.0019	19	13.6691	0.136691	3.2	1.78885	811641	900.911	35
32	1	no flower strip	5	F	0.0151	0.0128	0.0023	23	15.2318	0.152318	3.24	1.8	811641	900.911	35
33	1	no flower strip	6	F	0.0122	0.0106	0.0016	16	13.1148	0.131148	3.12	1.76635	129295	359.576	35
34	1	no flower strip	6	F	0.0133	0.011	0.0023	23	17.2932	0.172932	3.12	1.76635	129295	359.576	35
35	1	no flower strip	6	F	0.0134	0.0114	0.002	20	14.9254	0.149254	3.12	1.76635	129295	359.576	35
36	1	no flower strip	6	F	0.0113	0.0103	0.001	10	8.84956	0.0884956	3.08	1.75499	129295	359.576	35
37	1	no flower strip	6	F	0.0162	0.0133	0.0029	29	17.9012	0.179012	3.2	1.78885	129295	359.576	35
38	1	no flower strip	6	F	0.0114	0.0099	0.0015	15	13.1579	0.131579	3	1.73205	129295	359.576	35
39	1	no flower strip	6	F	0.0113	0.0103	0.001	10	8.84956	0.0884956	3	1.73205	129295	359.576	35
40	1	no flower strip	6	F	0.0121	0.0105	0.0016	16	13.2231	0.132231	3.08	1.75499	129295	359.576	35
41	1	no flower strip	7	F	0.0156	0.0135	0.0021	21	13.4615	0.134615	3.32	1.82209	257013	506.965	35
42	1	no flower strip	7	F	0.0125	0.0107	0.0018	18	14.4	0.144	3.08	1.75499	257013	506.965	35
43	1	no flower strip	7	F	0.0135	0.0123	0.0012	12	8.88889	0.0888889	3.2	1.78885	257013	506.965	35
44	1	no flower strip	7	F	0.0145	0.0119	0.0026	26	17.931	0.17931	3.12	1.76635	257013	506.965	35
45	1	no flower strip	7	F	0.015	0.0125	0.0025	25	16.6667	0.166667	3.16	1.77764	257013	506.965	35
46	1	no flower strip	7	F	0.0121	0.0099	0.0022	22	18.1818	0.181818	3.12	1.76635	257013	506.965	35
47	1	no flower strip	7	F	0.0135	0.0117	0.0018	18	13.3333	0.133333	3.2	1.78885	257013	506.965	35
48	1	no flower strip	7	F	0.0131	0.0107	0.0024	24	18.3206	0.183206	3.12	1.76635	257013	506.965	35
49	1	no flower strip	8	F	0.0131	0.0111	0.002	20	15.2672	0.152672	3.08	1.75499	219959	468.998	35
50	1	no flower strip	8	F	0.0118	0.0102	0.0016	16	13.5593	0.135593	3	1.73205	219959	468.998	35
51	1	no flower strip	8	F	0.0139	0.0115	0.0024	24	17.2662	0.172662	3.12	1.76635	219959	468.998	35
52	1	no flower strip	8	F	0.0131	0.0104	0.0027	27	20.6107	0.206107	3.08	1.75499	219959	468.998	35
53	1	no flower strip	8	F	0.0121	0.0103	0.0018	18	14.876	0.14876	3	1.73205	219959	468.998	35
54	1	no flower strip	8	F	0.013	0.0111	0.0019	19	14.6154	0.146154	3.08	1.75499	219959	468.998	35
55	1	no flower strip	8	F	0.0089	0.008	0.0009	9	10.1124	0.101124	2.84	1.68523	219959	468.998	35
56	1	no flower strip	8	F	0.0106	0.0092	0.0014	14	13.2075	0.132075	3	1.73205	219959	468.998	35
57	1	no flower strip	9	F	0.0142	0.0126	0.0016	16	11.2676	0.112676	3.2	1.78885	150581	388.048	35
58	1	no flower strip	9	F	0.0095	0.0078	0.0017	17	17.8947	0.178947	2.8	1.67332	150581	388.048	35
59	1	no flower strip	9	F	0.0156	0.0131	0.0025	25	16.0256	0.160256	3.28	1.81108	150581	388.048	35
60	1	no flower strip	9	F	0.0125	0.01	0.0025	25	20	0.2	3.04	1.74356	150581	388.048	35
61	1	no flower strip	9	F	0.0086	0.0077	0.0009	9	10.4651	0.104651	2.8	1.67332	150581	388.048	35
62	1	no flower strip	9	F	0.009	0.0078	0.0012	12	13.3333	0.133333	2.84	1.68523	150581	388.048	35
63	1	no flower strip	9	F	0.0096	0.0079	0.0017	17	17.7083	0.177083	2.76	1.66132	150581	388.048	35
64	1	no flower strip	9	F	0.0098	0.0086	0.0012	12	12.2449	0.122449	2.84	1.68523	150581	388.048	35
65	2	flower strip	2	F	0.0128	0.0104	0.0024	24	18.75	0.1875	3.12	1.76635	1.66112e+06	1288.85	100
66	2	flower strip	2	F	0.0147	0.0129	0.0018	18	12.2449	0.122449	3.2	1.78885	1.66112e+06	1288.85	100
67	2	flower strip	2	F	0.0142	0.0123	0.0019	19	13.3803	0.133803	3.16	1.77764	1.66112e+06	1288.85	100
68	2	flower strip	2	F	0.0138	0.0111	0.0027	27	19.5652	0.195652	3.16	1.77764	1.66112e+06	1288.85	100
69	2	flower strip	2	F	0.0113	0.0099	0.0014	14	12.3894	0.123894	3.08	1.75499	1.66112e+06	1288.85	100
70	2	flower strip	2	F	0.0146	0.0121	0.0025	25	17.1233	0.171233	3.2	1.78885	1.66112e+06	1288.85	100
71	2	flower strip	2	F	0.0118	0.0103	0.0015	15	12.7119	0.127119	3.04	1.74356	1.66112e+06	1288.85	100
72	2	flower strip	2	F	0.0158	0.0126	0.0032	32	20.2532	0.202532	3.16	1.77764	1.66112e+06	1288.85	100
73	2	flower strip	3	F	0.013	0.012	0.001	10	7.69231	0.0769231	3.16	1.77764	1.34932e+06	1161.6	100
74	2	flower strip	3	F	0.0123	0.0115	0.0008	8	6.50407	0.0650407	3.2	1.78885	1.34932e+06	1161.6	100
75	2	flower strip	3	F	0.0135	0.0109	0.0026	26	19.2593	0.192593	3.08	1.75499	1.34932e+06	1161.6	100
76	2	flower strip	3	F	0.0136	0.0111	0.0025	25	18.3824	0.183824	3.16	1.77764	1.34932e+06	1161.6	100
77	2	flower strip	3	F	0.0175	0.0152	0.0023	23	13.1429	0.131429	3.36	1.83303	1.34932e+06	1161.6	100
78	2	flower strip	3	F	0.013	0.0119	0.0011	11	8.46154	0.0846154	3.12	1.76635	1.34932e+06	1161.6	100
79	2	flower strip	3	F	0.0136	0.0115	0.0021	21	15.4412	0.154412	3.16	1.77764	1.34932e+06	1161.6	100
80	2	flower strip	3	F	0.0126	0.0108	0.0018	18	14.2857	0.142857	3.08	1.75499	1.34932e+06	1161.6	100
81	2	flower strip	4	F	0.0138	0.012	0.0018	18	13.0435	0.130435	3.2	1.78885	478549	691.772	100
82	2	flower strip	4	F	0.0123	0.0108	0.0015	15	12.1951	0.121951	3.12	1.76635	478549	691.772	100
83	2	flower strip	4	F	0.0119	0.0104	0.0015	15	12.605	0.12605	3.08	1.75499	478549	691.772	100
84	2	flower strip	4	F	0.016	0.0138	0.0022	22	13.75	0.1375	3.32	1.82209	478549	691.772	100
85	2	flower strip	4	F	0.0141	0.012	0.0021	21	14.8936	0.148936	3.2	1.78885	478549	691.772	100
86	2	flower strip	4	F	0.013	0.0111	0.0019	19	14.6154	0.146154	3.08	1.75499	478549	691.772	100
87	2	flower strip	4	F	0.0135	0.0116	0.0019	19	14.0741	0.140741	3.16	1.77764	478549	691.772	100
88	2	flower strip	4	F	0.0142	0.0119	0.0023	23	16.1972	0.161972	3.24	1.8	478549	691.772	100
89	2	flower strip	5	F	0.0126	0.0107	0.0019	19	15.0794	0.150794	3.12	1.76635	514420	717.231	100
90	2	flower strip	5	F	0.016	0.0136	0.0024	24	15	0.15	3.32	1.82209	514420	717.231	100
91	2	flower strip	5	F	0.0124	0.0107	0.0017	17	13.7097	0.137097	3.04	1.74356	514420	717.231	100
92	2	flower strip	5	F	0.0121	0.0105	0.0016	16	13.2231	0.132231	3.08	1.75499	514420	717.231	100
93	2	flower strip	5	F	0.0126	0.0109	0.0017	17	13.4921	0.134921	3.08	1.75499	514420	717.231	100
94	2	flower strip	5	F	0.0093	0.0084	0.0009	9	9.67742	0.0967742	2.84	1.68523	514420	717.231	100
95	2	flower strip	5	F	0.0154	0.0125	0.0029	29	18.8312	0.188312	3.24	1.8	514420	717.231	100
96	2	flower strip	5	F	0.013	0.0118	0.0012	12	9.23077	0.0923077	3.12	1.76635	514420	717.231	100
97	2	flower strip	6	F	0.0136	0.011	0.0026	26	19.1176	0.191176	3.08	1.75499	650416	806.484	100
98	2	flower strip	6	F	0.0149	0.012	0.0029	29	19.4631	0.194631	3.12	1.76635	650416	806.484	100
99	2	flower strip	6	F	0.0138	0.0116	0.0022	22	15.942	0.15942	3.16	1.77764	650416	806.484	100
100	2	flower strip	6	F	0.016	0.0135	0.0025	25	15.625	0.15625	3.24	1.8	650416	806.484	100
101	2	flower strip	6	F	0.0103	0.009	0.0013	13	12.6214	0.126214	2.92	1.7088	650416	806.484	100
102	2	flower strip	6	F	0.012	0.0099	0.0021	21	17.5	0.175	3	1.73205	650416	806.484	100
103	2	flower strip	6	F	0.0105	0.0088	0.0017	17	16.1905	0.161905	2.88	1.69706	650416	806.484	100
104	2	flower strip	6	F	0.008	0.0064	0.0016	16	20	0.2	2.76	1.66132	650416	806.484	100
105	2	flower strip	7	F	0.0107	0.0099	0.0008	8	7.47664	0.0747664	3	1.73205	583798	764.067	100
106	2	flower strip	7	F	0.012	0.0107	0.0013	13	10.8333	0.108333	3.16	1.77764	583798	764.067	100
107	2	flower strip	7	F	0.01	0.0094	0.0006	6	6	0.06	3.04	1.74356	583798	764.067	100
108	2	flower strip	7	F	0.0124	0.0113	0.0011	11	8.87097	0.0887097	3.16	1.77764	583798	764.067	100
109	2	flower strip	7	F	0.0115	0.0102	0.0013	13	11.3043	0.113043	3.04	1.74356	583798	764.067	100
110	2	flower strip	7	F	0.0138	0.0116	0.0022	22	15.942	0.15942	3.16	1.77764	583798	764.067	100
111	2	flower strip	7	F	0.0119	0.0108	0.0011	11	9.2437	0.092437	3.08	1.75499	583798	764.067	100
112	2	flower strip	7	F	0.0123	0.0116	0.0007	7	5.69106	0.0569106	3.16	1.77764	583798	764.067	100
113	2	flower strip	8	F	0.0124	0.0111	0.0013	13	10.4839	0.104839	3.12	1.76635	187241	432.714	100
114	2	flower strip	8	F	0.0158	0.0129	0.0029	29	18.3544	0.183544	3.2	1.78885	187241	432.714	100
115	2	flower strip	8	F	0.0112	0.01	0.0012	12	10.7143	0.107143	3.08	1.75499	187241	432.714	100
116	2	flower strip	8	F	0.0116	0.0104	0.0012	12	10.3448	0.103448	3	1.73205	187241	432.714	100
117	2	flower strip	8	F	0.0066	0.0051	0.0015	15	22.7273	0.227273	2.6	1.61245	187241	432.714	100
118	2	flower strip	8	F	0.0109	0.0088	0.0021	21	19.2661	0.192661	2.92	1.7088	187241	432.714	100
119	2	flower strip	8	F	0.0135	0.0114	0.0021	21	15.5556	0.155556	3.08	1.75499	187241	432.714	100
120	2	flower strip	8	F	0.0137	0.0116	0.0021	21	15.3285	0.153285	3.08	1.75499	187241	432.714	100
121	2	flower strip	9	F	0.0113	0.0101	0.0012	12	10.6195	0.106195	3.08	1.75499	111162	333.41	100
122	2	flower strip	9	F	0.0145	0.013	0.0015	15	10.3448	0.103448	3.32	1.82209	111162	333.41	100
123	2	flower strip	9	F	0.0103	0.0082	0.0021	21	20.3883	0.203883	2.84	1.68523	111162	333.41	100
124	2	flower strip	9	F	0.0102	0.0095	0.0007	7	6.86275	0.0686275	3.04	1.74356	111162	333.41	100
125	2	flower strip	9	F	0.0102	0.0097	0.0005	5	4.90196	0.0490196	3.04	1.74356	111162	333.41	100
126	2	flower strip	9	F	0.0097	0.0089	0.0008	8	8.24742	0.0824742	2.92	1.7088	111162	333.41	100
127	2	flower strip	9	F	0.0094	0.0085	0.0009	9	9.57447	0.0957447	2.96	1.72047	111162	333.41	100
128	2	flower strip	9	F	0.01	0.0088	0.0012	12	12	0.12	2.96	1.72047	111162	333.41	100
129	3	no flower strip	2	F	0.015	0.0119	0.0031	31	20.6667	0.206667	3.2	1.78885	1.00282e+06	1001.41	10
130	3	no flower strip	2	F	0.0154	0.012	0.0034	34	22.0779	0.220779	3.24	1.8	1.00282e+06	1001.41	10
131	3	no flower strip	2	F	0.0138	0.0115	0.0023	23	16.6667	0.166667	3.2	1.78885	1.00282e+06	1001.41	10
132	3	no flower strip	2	F	0.0137	0.0117	0.002	20	14.5985	0.145985	3.24	1.8	1.00282e+06	1001.41	10
133	3	no flower strip	2	F	0.0151	0.0126	0.0025	25	16.5563	0.165563	3.24	1.8	1.00282e+06	1001.41	10
134	3	no flower strip	2	F	0.0149	0.0124	0.0025	25	16.7785	0.167785	3.28	1.81108	1.00282e+06	1001.41	10
135	3	no flower strip	2	F	0.0146	0.0125	0.0021	21	14.3836	0.143836	3.28	1.81108	1.00282e+06	1001.41	10
136	3	no flower strip	2	F	0.0132	0.0114	0.0018	18	13.6364	0.136364	3.12	1.76635	1.00282e+06	1001.41	10
137	3	no flower strip	3	F	0.0161	0.0127	0.0034	34	21.118	0.21118	3.24	1.8	882595	939.465	10
138	3	no flower strip	3	F	0.0128	0.0102	0.0026	26	20.3125	0.203125	3.04	1.74356	882595	939.465	10
139	3	no flower strip	3	F	0.0136	0.0112	0.0024	24	17.6471	0.176471	3.12	1.76635	882595	939.465	10
140	3	no flower strip	3	F	0.0135	0.0114	0.0021	21	15.5556	0.155556	3.2	1.78885	882595	939.465	10
141	3	no flower strip	3	F	0.0118	0.0098	0.002	20	16.9492	0.169492	3.04	1.74356	882595	939.465	10
142	3	no flower strip	3	F	0.0138	0.0114	0.0024	24	17.3913	0.173913	3.16	1.77764	882595	939.465	10
143	3	no flower strip	3	F	0.0124	0.0107	0.0017	17	13.7097	0.137097	3.16	1.77764	882595	939.465	10
144	3	no flower strip	3	F	0.0115	0.0093	0.0022	22	19.1304	0.191304	3	1.73205	882595	939.465	10
145	3	no flower strip	4	F	0.0172	0.0139	0.0033	33	19.186	0.19186	3.32	1.82209	259378	509.292	10
146	3	no flower strip	4	F	0.0136	0.0124	0.0012	12	8.82353	0.0882353	3.2	1.78885	259378	509.292	10
147	3	no flower strip	4	F	0.0128	0.0108	0.002	20	15.625	0.15625	3.12	1.76635	259378	509.292	10
148	3	no flower strip	4	F	0.0124	0.0104	0.002	20	16.129	0.16129	3.04	1.74356	259378	509.292	10
149	3	no flower strip	4	F	0.0127	0.0103	0.0024	24	18.8976	0.188976	3.08	1.75499	259378	509.292	10
150	3	no flower strip	4	F	0.0143	0.0123	0.002	20	13.986	0.13986	3.2	1.78885	259378	509.292	10
151	3	no flower strip	4	F	0.0117	0.0099	0.0018	18	15.3846	0.153846	3.04	1.74356	259378	509.292	10
152	3	no flower strip	4	F	0.0152	0.0123	0.0029	29	19.0789	0.190789	3.24	1.8	259378	509.292	10
153	3	no flower strip	5	F	0.0128	0.0108	0.002	20	15.625	0.15625	3.16	1.77764	13402.5	115.769	10
154	3	no flower strip	5	F	0.0109	0.0097	0.0012	12	11.0092	0.110092	3	1.73205	13402.5	115.769	10
155	3	no flower strip	5	F	0.0134	0.0108	0.0026	26	19.403	0.19403	3.12	1.76635	13402.5	115.769	10
156	3	no flower strip	5	F	0.0125	0.0107	0.0018	18	14.4	0.144	3.08	1.75499	13402.5	115.769	10
157	3	no flower strip	5	F	0.0155	0.0119	0.0036	36	23.2258	0.232258	3.24	1.8	13402.5	115.769	10
158	3	no flower strip	5	F	0.0117	0.0096	0.0021	21	17.9487	0.179487	3	1.73205	13402.5	115.769	10
159	3	no flower strip	5	F	0.014	0.0117	0.0023	23	16.4286	0.164286	3.12	1.76635	13402.5	115.769	10
160	3	no flower strip	5	F	0.0114	0.01	0.0014	14	12.2807	0.122807	3.08	1.75499	13402.5	115.769	10
161	3	no flower strip	6	F	0.0133	0.0111	0.0022	22	16.5414	0.165414	3.2	1.78885	42572.7	206.332	10
162	3	no flower strip	6	F	0.0157	0.0128	0.0029	29	18.4713	0.184713	3.24	1.8	42572.7	206.332	10
163	3	no flower strip	6	F	0.0143	0.0124	0.0019	19	13.2867	0.132867	3.16	1.77764	42572.7	206.332	10
164	3	no flower strip	6	F	0.0137	0.0121	0.0016	16	11.6788	0.116788	3.24	1.8	42572.7	206.332	10
165	3	no flower strip	6	F	0.0143	0.0117	0.0026	26	18.1818	0.181818	3.2	1.78885	42572.7	206.332	10
166	3	no flower strip	6	F	0.0106	0.0097	0.0009	9	8.49057	0.0849057	3.04	1.74356	42572.7	206.332	10
167	3	no flower strip	6	F	0.0137	0.0115	0.0022	22	16.0584	0.160584	3.12	1.76635	42572.7	206.332	10
168	3	no flower strip	6	F	0.0088	0.0077	0.0011	11	12.5	0.125	2.88	1.69706	42572.7	206.332	10
169	3	no flower strip	7	F	0.0156	0.013	0.0026	26	16.6667	0.166667	3.24	1.8	11825.8	108.746	10
170	3	no flower strip	7	F	0.0131	0.0115	0.0016	16	12.2137	0.122137	3.2	1.78885	11825.8	108.746	10
171	3	no flower strip	7	F	0.0065	0.006	0.0005	5	7.69231	0.0769231	2.68	1.63707	11825.8	108.746	10
172	3	no flower strip	7	F	0.0107	0.0094	0.0013	13	12.1495	0.121495	3	1.73205	11825.8	108.746	10
173	3	no flower strip	7	F	0.0119	0.0113	0.0006	6	5.04202	0.0504202	3.2	1.78885	11825.8	108.746	10
174	3	no flower strip	7	F	0.0168	0.0148	0.002	20	11.9048	0.119048	3.24	1.8	11825.8	108.746	10
175	3	no flower strip	7	F	0.0105	0.0094	0.0011	11	10.4762	0.104762	2.92	1.7088	11825.8	108.746	10
176	3	no flower strip	7	F	0.0096	0.0095	0.0001	1	1.04167	0.0104167	2.96	1.72047	11825.8	108.746	10
177	3	no flower strip	8	F	0.015	0.0125	0.0025	25	16.6667	0.166667	3.2	1.78885	0	0	10
178	3	no flower strip	8	F	0.0172	0.0138	0.0034	34	19.7674	0.197674	3.32	1.82209	0	0	10
179	3	no flower strip	8	F	0.0095	0.0078	0.0017	17	17.8947	0.178947	2.84	1.68523	0	0	10
180	3	no flower strip	8	F	0.0144	0.0114	0.003	30	20.8333	0.208333	3.08	1.75499	0	0	10
181	3	no flower strip	8	F	0.0124	0.0108	0.0016	16	12.9032	0.129032	3.12	1.76635	0	0	10
182	3	no flower strip	8	F	0.0064	0.0058	0.0006	6	9.375	0.09375	2.6	1.61245	0	0	10
183	3	no flower strip	8	F	0.0159	0.0131	0.0028	28	17.6101	0.176101	3.2	1.78885	0	0	10
184	3	no flower strip	8	F	0.007	0.0068	0.0002	2	2.85714	0.0285714	2.64	1.62481	0	0	10
185	3	no flower strip	9	F	0.0102	0.009	0.0012	12	11.7647	0.117647	2.96	1.72047	0	0	10
186	3	no flower strip	9	F	0.011	0.0095	0.0015	15	13.6364	0.136364	2.96	1.72047	0	0	10
187	3	no flower strip	9	F	0.0115	0.0103	0.0012	12	10.4348	0.104348	3.08	1.75499	0	0	10
188	3	no flower strip	9	F	0.0121	0.0101	0.002	20	16.5289	0.165289	3.04	1.74356	0	0	10
189	3	no flower strip	9	F	0.0077	0.0068	0.0009	9	11.6883	0.116883	2.72	1.64924	0	0	10
190	3	no flower strip	9	F	0.0084	0.0071	0.0013	13	15.4762	0.154762	2.68	1.63707	0	0	10
191	3	no flower strip	9	F	0.009	0.0085	0.0005	5	5.55556	0.0555556	2.8	1.67332	0	0	10
192	3	no flower strip	9	F	0.0084	0.0079	0.0005	5	5.95238	0.0595238	2.8	1.67332	0	0	10
193	4	flower strip	2	F	0.0176	0.015	0.0026	26	14.7727	0.147727	3.36	1.83303	1.53459e+06	1238.79	320
194	4	flower strip	2	F	0.0143	0.012	0.0023	23	16.0839	0.160839	3.12	1.76635	1.53459e+06	1238.79	320
195	4	flower strip	2	F	0.0145	0.0118	0.0027	27	18.6207	0.186207	3.2	1.78885	1.53459e+06	1238.79	320
196	4	flower strip	2	F	0.0168	0.0138	0.003	30	17.8571	0.178571	3.32	1.82209	1.53459e+06	1238.79	320
197	4	flower strip	2	F	0.0161	0.0142	0.0019	19	11.8012	0.118012	3.32	1.82209	1.53459e+06	1238.79	320
198	4	flower strip	2	F	0.0172	0.0138	0.0034	34	19.7674	0.197674	3.32	1.82209	1.53459e+06	1238.79	320
199	4	flower strip	2	F	0.0158	0.0129	0.0029	29	18.3544	0.183544	3.28	1.81108	1.53459e+06	1238.79	320
200	4	flower strip	2	F	0.0143	0.0113	0.003	30	20.979	0.20979	3.12	1.76635	1.53459e+06	1238.79	320
201	4	flower strip	3	F	0.0158	0.0136	0.0022	22	13.9241	0.139241	3.28	1.81108	888508	942.607	320
202	4	flower strip	3	F	0.015	0.0125	0.0025	25	16.6667	0.166667	3.2	1.78885	888508	942.607	320
203	4	flower strip	3	F	0.0076	0.0067	0.0009	9	11.8421	0.118421	2.68	1.63707	888508	942.607	320
204	4	flower strip	3	F	0.014	0.0117	0.0023	23	16.4286	0.164286	3.12	1.76635	888508	942.607	320
205	4	flower strip	3	F	0.012	0.0101	0.0019	19	15.8333	0.158333	2.92	1.7088	888508	942.607	320
206	4	flower strip	3	F	0.0144	0.0121	0.0023	23	15.9722	0.159722	3.2	1.78885	888508	942.607	320
207	4	flower strip	3	F	0.0151	0.0123	0.0028	28	18.543	0.18543	3.16	1.77764	888508	942.607	320
208	4	flower strip	3	F	0.0063	0.0057	0.0006	6	9.52381	0.0952381	2.64	1.62481	888508	942.607	320
209	4	flower strip	4	F	0.0151	0.0121	0.003	30	19.8675	0.198675	3.12	1.76635	216805	465.624	320
210	4	flower strip	4	F	0.016	0.0133	0.0027	27	16.875	0.16875	3.28	1.81108	216805	465.624	320
211	4	flower strip	4	F	0.0138	0.0116	0.0022	22	15.942	0.15942	3.2	1.78885	216805	465.624	320
212	4	flower strip	4	F	0.0151	0.013	0.0021	21	13.9073	0.139073	3.24	1.8	216805	465.624	320
213	4	flower strip	4	F	0.0156	0.0129	0.0027	27	17.3077	0.173077	3.24	1.8	216805	465.624	320
214	4	flower strip	4	F	0.009	0.0076	0.0014	14	15.5556	0.155556	2.92	1.7088	216805	465.624	320
215	4	flower strip	4	F	0.0132	0.0112	0.002	20	15.1515	0.151515	3.08	1.75499	216805	465.624	320
216	4	flower strip	4	F	0.0152	0.013	0.0022	22	14.4737	0.144737	3.2	1.78885	216805	465.624	320
217	4	flower strip	5	F	0.0167	0.0136	0.0031	31	18.5629	0.185629	3.28	1.81108	9066.41	95.2177	320
218	4	flower strip	5	F	0.0118	0.0102	0.0016	16	13.5593	0.135593	3	1.73205	9066.41	95.2177	320
219	4	flower strip	5	F	0.0119	0.0103	0.0016	16	13.4454	0.134454	3	1.73205	9066.41	95.2177	320
220	4	flower strip	5	F	0.0122	0.0105	0.0017	17	13.9344	0.139344	3.04	1.74356	9066.41	95.2177	320
221	4	flower strip	5	F	0.017	0.0132	0.0038	38	22.3529	0.223529	3.28	1.81108	9066.41	95.2177	320
222	4	flower strip	5	F	0.0156	0.0124	0.0032	32	20.5128	0.205128	3.2	1.78885	9066.41	95.2177	320
223	4	flower strip	5	F	0.0114	0.0094	0.002	20	17.5439	0.175439	2.96	1.72047	9066.41	95.2177	320
224	4	flower strip	5	F	0.0154	0.0127	0.0027	27	17.5325	0.175325	3.2	1.78885	9066.41	95.2177	320
225	4	flower strip	6	F	0.0132	0.0117	0.0015	15	11.3636	0.113636	3.16	1.77764	113527	336.938	320
226	4	flower strip	6	F	0.0152	0.0132	0.002	20	13.1579	0.131579	3.28	1.81108	113527	336.938	320
227	4	flower strip	6	F	0.0116	0.01	0.0016	16	13.7931	0.137931	3.08	1.75499	113527	336.938	320
228	4	flower strip	6	F	0.0122	0.0104	0.0018	18	14.7541	0.147541	3	1.73205	113527	336.938	320
229	4	flower strip	6	F	0.0128	0.0105	0.0023	23	17.9688	0.179688	3	1.73205	113527	336.938	320
230	4	flower strip	6	F	0.0132	0.0109	0.0023	23	17.4242	0.174242	3	1.73205	113527	336.938	320
231	4	flower strip	6	F	0.0137	0.0119	0.0018	18	13.1387	0.131387	3.16	1.77764	113527	336.938	320
232	4	flower strip	6	F	0.0138	0.0113	0.0025	25	18.1159	0.181159	3.16	1.77764	113527	336.938	320
233	4	flower strip	7	F	0.0133	0.0107	0.0026	26	19.5489	0.195489	3.08	1.75499	65435.8	255.804	320
234	4	flower strip	7	F	0.011	0.0099	0.0011	11	10	0.1	3	1.73205	65435.8	255.804	320
235	4	flower strip	7	F	0.0145	0.0126	0.0019	19	13.1034	0.131034	3.16	1.77764	65435.8	255.804	320
236	4	flower strip	7	F	0.0114	0.0101	0.0013	13	11.4035	0.114035	3.08	1.75499	65435.8	255.804	320
237	4	flower strip	7	F	0.0123	0.0101	0.0022	22	17.8862	0.178862	3	1.73205	65435.8	255.804	320
238	4	flower strip	7	F	0.0119	0.0099	0.002	20	16.8067	0.168067	2.96	1.72047	65435.8	255.804	320
239	4	flower strip	7	F	0.0147	0.013	0.0017	17	11.5646	0.115646	3.24	1.8	65435.8	255.804	320
240	4	flower strip	7	F	0.0096	0.0083	0.0013	13	13.5417	0.135417	2.8	1.67332	65435.8	255.804	320
241	4	flower strip	8	F	0.0125	0.0112	0.0013	13	10.4	0.104	3.16	1.77764	56369.4	237.422	320
242	4	flower strip	8	F	0.0112	0.0102	0.001	10	8.92857	0.0892857	3	1.73205	56369.4	237.422	320
243	4	flower strip	8	F	0.0124	0.0103	0.0021	21	16.9355	0.169355	3.04	1.74356	56369.4	237.422	320
244	4	flower strip	8	F	0.0146	0.0122	0.0024	24	16.4384	0.164384	3.12	1.76635	56369.4	237.422	320
245	4	flower strip	8	F	0.0133	0.0112	0.0021	21	15.7895	0.157895	3.04	1.74356	56369.4	237.422	320
246	4	flower strip	8	F	0.0119	0.011	0.0009	9	7.56303	0.0756303	3.04	1.74356	56369.4	237.422	320
247	4	flower strip	8	F	0.0114	0.0099	0.0015	15	13.1579	0.131579	3.04	1.74356	56369.4	237.422	320
248	4	flower strip	8	F	0.0127	0.0107	0.002	20	15.748	0.15748	3.04	1.74356	56369.4	237.422	320
249	4	flower strip	9	F	0.0125	0.0102	0.0023	23	18.4	0.184	3	1.73205	0	0	320
250	4	flower strip	9	F	0.0133	0.0112	0.0021	21	15.7895	0.157895	3.12	1.76635	0	0	320
251	4	flower strip	9	F	0.0108	0.0091	0.0017	17	15.7407	0.157407	2.88	1.69706	0	0	320
252	4	flower strip	9	F	0.0131	0.011	0.0021	21	16.0305	0.160305	3.08	1.75499	0	0	320
253	4	flower strip	9	F	0.0145	0.0115	0.003	30	20.6897	0.206897	3.12	1.76635	0	0	320
254	4	flower strip	9	F	0.0128	0.0116	0.0012	12	9.375	0.09375	3.16	1.77764	0	0	320
255	4	flower strip	9	F	0.0134	0.0117	0.0017	17	12.6866	0.126866	3.2	1.78885	0	0	320
256	4	flower strip	9	F	0.0116	0.0099	0.0017	17	14.6552	0.146552	3	1.73205	0	0	320
257	5	no flower strip	2	F	0.0149	0.0127	0.0022	22	14.7651	0.147651	3.2	1.78885	2.82202e+06	1679.89	330
258	5	no flower strip	2	F	0.014	0.0121	0.0019	19	13.5714	0.135714	3.16	1.77764	2.82202e+06	1679.89	330
259	5	no flower strip	2	F	0.0152	0.0129	0.0023	23	15.1316	0.151316	3.2	1.78885	2.82202e+06	1679.89	330
260	5	no flower strip	2	F	0.0168	0.0149	0.0019	19	11.3095	0.113095	3.32	1.82209	2.82202e+06	1679.89	330
261	5	no flower strip	2	F	0.014	0.0115	0.0025	25	17.8571	0.178571	3.16	1.77764	2.82202e+06	1679.89	330
262	5	no flower strip	2	F	0.0137	0.0115	0.0022	22	16.0584	0.160584	3.16	1.77764	2.82202e+06	1679.89	330
263	5	no flower strip	2	F	0.016	0.014	0.002	20	12.5	0.125	3.24	1.8	2.82202e+06	1679.89	330
264	5	no flower strip	2	F	0.0161	0.0133	0.0028	28	17.3913	0.173913	3.2	1.78885	2.82202e+06	1679.89	330
265	5	no flower strip	3	F	0.0133	0.0121	0.0012	12	9.02256	0.0902256	3.12	1.76635	842388	917.817	330
266	5	no flower strip	3	F	0.0124	0.0108	0.0016	16	12.9032	0.129032	3.04	1.74356	842388	917.817	330
267	5	no flower strip	3	F	0.0148	0.0121	0.0027	27	18.2432	0.182432	3.16	1.77764	842388	917.817	330
268	5	no flower strip	3	F	0.0112	0.0097	0.0015	15	13.3929	0.133929	2.96	1.72047	842388	917.817	330
269	5	no flower strip	3	F	0.0112	0.0097	0.0015	15	13.3929	0.133929	2.92	1.7088	842388	917.817	330
270	5	no flower strip	3	F	0.0166	0.0134	0.0032	32	19.2771	0.192771	3.24	1.8	842388	917.817	330
271	5	no flower strip	3	F	0.0132	0.0112	0.002	20	15.1515	0.151515	3.08	1.75499	842388	917.817	330
272	5	no flower strip	3	F	0.0137	0.0117	0.002	20	14.5985	0.145985	3.12	1.76635	842388	917.817	330
273	5	no flower strip	4	F	0.015	0.0129	0.0021	21	14	0.14	3.2	1.78885	812429	901.349	330
274	5	no flower strip	4	F	0.0123	0.0105	0.0018	18	14.6341	0.146341	3	1.73205	812429	901.349	330
275	5	no flower strip	4	F	0.0133	0.0108	0.0025	25	18.797	0.18797	3.04	1.74356	812429	901.349	330
276	5	no flower strip	4	F	0.014	0.0122	0.0018	18	12.8571	0.128571	3.12	1.76635	812429	901.349	330
277	5	no flower strip	4	F	0.017	0.0139	0.0031	31	18.2353	0.182353	3.24	1.8	812429	901.349	330
278	5	no flower strip	4	F	0.0114	0.0101	0.0013	13	11.4035	0.114035	2.96	1.72047	812429	901.349	330
279	5	no flower strip	4	F	0.0147	0.0123	0.0024	24	16.3265	0.163265	3.16	1.77764	812429	901.349	330
280	5	no flower strip	4	F	0.0126	0.0115	0.0011	11	8.73016	0.0873016	3.04	1.74356	812429	901.349	330
281	5	no flower strip	5	F	0.0102	0.0093	0.0009	9	8.82353	0.0882353	2.88	1.69706	439130	662.669	330
282	5	no flower strip	5	F	0.0131	0.0113	0.0018	18	13.7405	0.137405	3.12	1.76635	439130	662.669	330
283	5	no flower strip	5	F	0.0136	0.0118	0.0018	18	13.2353	0.132353	3.16	1.77764	439130	662.669	330
284	5	no flower strip	5	F	0.0143	0.0125	0.0018	18	12.5874	0.125874	3.16	1.77764	439130	662.669	330
285	5	no flower strip	5	F	0.0127	0.0124	0.0003	3	2.3622	0.023622	3.2	1.78885	439130	662.669	330
286	5	no flower strip	5	F	0.0131	0.0118	0.0013	13	9.92366	0.0992366	3.12	1.76635	439130	662.669	330
287	5	no flower strip	5	F	0.012	0.0106	0.0014	14	11.6667	0.116667	3.04	1.74356	439130	662.669	330
288	5	no flower strip	5	F	0.0122	0.0113	0.0009	9	7.37705	0.0737705	3.12	1.76635	439130	662.669	330
289	5	no flower strip	6	F	0.0174	0.0145	0.0029	29	16.6667	0.166667	3.32	1.82209	413507	643.045	330
290	5	no flower strip	6	F	0.011	0.01	0.001	10	9.09091	0.0909091	3	1.73205	413507	643.045	330
291	5	no flower strip	6	F	0.0113	0.0096	0.0017	17	15.0442	0.150442	3.04	1.74356	413507	643.045	330
292	5	no flower strip	6	F	0.0201	0.0163	0.0038	38	18.9055	0.189055	3.44	1.85472	413507	643.045	330
293	5	no flower strip	6	F	0.0142	0.0123	0.0019	19	13.3803	0.133803	3.12	1.76635	413507	643.045	330
294	5	no flower strip	6	F	0.0114	0.0095	0.0019	19	16.6667	0.166667	2.96	1.72047	413507	643.045	330
295	5	no flower strip	6	F	0.0126	0.0107	0.0019	19	15.0794	0.150794	3	1.73205	413507	643.045	330
296	5	no flower strip	6	F	0.0124	0.0104	0.002	20	16.129	0.16129	3.04	1.74356	413507	643.045	330
297	5	no flower strip	7	F	0.0128	0.0112	0.0016	16	12.5	0.125	3.12	1.76635	242822	492.77	330
298	5	no flower strip	7	F	0.0102	0.0093	0.0009	9	8.82353	0.0882353	2.96	1.72047	242822	492.77	330
299	5	no flower strip	7	F	0.012	0.0112	0.0008	8	6.66667	0.0666667	3.12	1.76635	242822	492.77	330
300	5	no flower strip	7	F	0.0126	0.0111	0.0015	15	11.9048	0.119048	3.08	1.75499	242822	492.77	330
301	5	no flower strip	7	F	0.0099	0.0089	0.001	10	10.101	0.10101	3	1.73205	242822	492.77	330
302	5	no flower strip	7	F	0.0108	0.0098	0.001	10	9.25926	0.0925926	3	1.73205	242822	492.77	330
303	5	no flower strip	7	F	0.0092	0.0085	0.0007	7	7.6087	0.076087	2.92	1.7088	242822	492.77	330
304	5	no flower strip	7	F	0.011	0.0098	0.0012	12	10.9091	0.109091	3	1.73205	242822	492.77	330
305	5	no flower strip	8	F	0.0102	0.0086	0.0016	16	15.6863	0.156863	2.8	1.67332	254254	504.236	330
306	5	no flower strip	8	F	0.0107	0.0095	0.0012	12	11.215	0.11215	2.92	1.7088	254254	504.236	330
307	5	no flower strip	8	F	0.0131	0.0112	0.0019	19	14.5038	0.145038	3.12	1.76635	254254	504.236	330
308	5	no flower strip	8	F	0.0112	0.0103	0.0009	9	8.03571	0.0803571	3.04	1.74356	254254	504.236	330
309	5	no flower strip	8	F	0.0085	0.0076	0.0009	9	10.5882	0.105882	2.72	1.64924	254254	504.236	330
310	5	no flower strip	8	F	0.0123	0.0108	0.0015	15	12.1951	0.121951	2.96	1.72047	254254	504.236	330
311	5	no flower strip	8	F	0.0122	0.0102	0.002	20	16.3934	0.163934	3	1.73205	254254	504.236	330
312	5	no flower strip	8	F	0.0107	0.009	0.0017	17	15.8879	0.158879	2.88	1.69706	254254	504.236	330
313	5	no flower strip	9	F	0.0137	0.0117	0.002	20	14.5985	0.145985	3.16	1.77764	52427.5	228.971	330
314	5	no flower strip	9	F	0.012	0.0112	0.0008	8	6.66667	0.0666667	3.08	1.75499	52427.5	228.971	330
315	5	no flower strip	9	F	0.0145	0.0122	0.0023	23	15.8621	0.158621	3.2	1.78885	52427.5	228.971	330
316	5	no flower strip	9	F	0.0142	0.0122	0.002	20	14.0845	0.140845	3.16	1.77764	52427.5	228.971	330
317	5	no flower strip	9	F	0.0135	0.0117	0.0018	18	13.3333	0.133333	3.16	1.77764	52427.5	228.971	330
318	5	no flower strip	9	F	0.0147	0.0127	0.002	20	13.6054	0.136054	3.16	1.77764	52427.5	228.971	330
319	5	no flower strip	9	F	0.0112	0.0093	0.0019	19	16.9643	0.169643	2.92	1.7088	52427.5	228.971	330
320	5	no flower strip	9	F	0.0114	0.0095	0.0019	19	16.6667	0.166667	2.96	1.72047	52427.5	228.971	330
321	6	flower strip	2	F	0.0158	0.0128	0.003	30	18.9873	0.189873	3.24	1.8	2.29459e+06	1514.79	10
322	6	flower strip	2	F	0.0145	0.0129	0.0016	16	11.0345	0.110345	3.24	1.8	2.29459e+06	1514.79	10
323	6	flower strip	2	F	0.0163	0.0135	0.0028	28	17.1779	0.171779	3.32	1.82209	2.29459e+06	1514.79	10
324	6	flower strip	2	F	0.0166	0.0136	0.003	30	18.0723	0.180723	3.28	1.81108	2.29459e+06	1514.79	10
325	6	flower strip	2	F	0.0128	0.012	0.0008	8	6.25	0.0625	3.16	1.77764	2.29459e+06	1514.79	10
326	6	flower strip	2	F	0.0124	0.0116	0.0008	8	6.45161	0.0645161	3.12	1.76635	2.29459e+06	1514.79	10
327	6	flower strip	2	F	0.0134	0.0112	0.0022	22	16.4179	0.164179	3.08	1.75499	2.29459e+06	1514.79	10
328	6	flower strip	2	F	0.0151	0.0127	0.0024	24	15.894	0.15894	3.24	1.8	2.29459e+06	1514.79	10
329	6	flower strip	3	F	0.0158	0.0128	0.003	30	18.9873	0.189873	3.24	1.8	1.40687e+06	1186.12	10
330	6	flower strip	3	F	0.0131	0.0116	0.0015	15	11.4504	0.114504	3.04	1.74356	1.40687e+06	1186.12	10
331	6	flower strip	3	F	0.0151	0.0129	0.0022	22	14.5695	0.145695	3.2	1.78885	1.40687e+06	1186.12	10
332	6	flower strip	3	F	0.0145	0.0128	0.0017	17	11.7241	0.117241	3.16	1.77764	1.40687e+06	1186.12	10
333	6	flower strip	3	F	0.014	0.013	0.001	10	7.14286	0.0714286	3.24	1.8	1.40687e+06	1186.12	10
334	6	flower strip	3	F	0.0123	0.0108	0.0015	15	12.1951	0.121951	3.08	1.75499	1.40687e+06	1186.12	10
335	6	flower strip	3	F	0.0143	0.0119	0.0024	24	16.7832	0.167832	3.2	1.78885	1.40687e+06	1186.12	10
336	6	flower strip	3	F	0.0103	0.0089	0.0014	14	13.5922	0.135922	2.84	1.68523	1.40687e+06	1186.12	10
337	6	flower strip	4	F	0.0153	0.0144	0.0009	9	5.88235	0.0588235	3.28	1.81108	636225	797.637	10
338	6	flower strip	4	F	0.0161	0.0139	0.0022	22	13.6646	0.136646	3.24	1.8	636225	797.637	10
339	6	flower strip	4	F	0.0135	0.0122	0.0013	13	9.62963	0.0962963	3.2	1.78885	636225	797.637	10
340	6	flower strip	4	F	0.0152	0.0131	0.0021	21	13.8158	0.138158	3.2	1.78885	636225	797.637	10
341	6	flower strip	4	F	0.0162	0.0141	0.0021	21	12.963	0.12963	3.24	1.8	636225	797.637	10
342	6	flower strip	4	F	0.0145	0.0121	0.0024	24	16.5517	0.165517	3.08	1.75499	636225	797.637	10
343	6	flower strip	4	F	0.0148	0.0125	0.0023	23	15.5405	0.155405	3.2	1.78885	636225	797.637	10
344	6	flower strip	4	F	0.0109	0.0098	0.0011	11	10.0917	0.100917	2.96	1.72047	636225	797.637	10
345	6	flower strip	5	F	0.0139	0.012	0.0019	19	13.6691	0.136691	3.16	1.77764	201826	449.251	10
346	6	flower strip	5	F	0.0126	0.0104	0.0022	22	17.4603	0.174603	3.04	1.74356	201826	449.251	10
347	6	flower strip	5	F	0.0138	0.0121	0.0017	17	12.3188	0.123188	3.2	1.78885	201826	449.251	10
348	6	flower strip	5	F	0.0117	0.0103	0.0014	14	11.9658	0.119658	3.04	1.74356	201826	449.251	10
349	6	flower strip	5	F	0.0116	0.0102	0.0014	14	12.069	0.12069	3	1.73205	201826	449.251	10
350	6	flower strip	5	F	0.015	0.0129	0.0021	21	14	0.14	3.24	1.8	201826	449.251	10
351	6	flower strip	5	F	0.0072	0.0058	0.0014	14	19.4444	0.194444	2.6	1.61245	201826	449.251	10
352	6	flower strip	5	F	0.0128	0.0112	0.0016	16	12.5	0.125	3.08	1.75499	201826	449.251	10
353	6	flower strip	6	F	0.011	0.0093	0.0017	17	15.4545	0.154545	2.92	1.7088	107220	327.445	10
354	6	flower strip	6	F	0.0116	0.009	0.0026	26	22.4138	0.224138	3	1.73205	107220	327.445	10
355	6	flower strip	6	F	0.0143	0.0119	0.0024	24	16.7832	0.167832	3.16	1.77764	107220	327.445	10
356	6	flower strip	6	F	0.0119	0.0103	0.0016	16	13.4454	0.134454	3.08	1.75499	107220	327.445	10
357	6	flower strip	6	F	0.0129	0.0112	0.0017	17	13.1783	0.131783	3.04	1.74356	107220	327.445	10
358	6	flower strip	6	F	0.0098	0.0087	0.0011	11	11.2245	0.112245	2.84	1.68523	107220	327.445	10
359	6	flower strip	6	F	0.0129	0.0111	0.0018	18	13.9535	0.139535	3.04	1.74356	107220	327.445	10
360	6	flower strip	6	F	0.0137	0.012	0.0017	17	12.4088	0.124088	3.16	1.77764	107220	327.445	10
361	6	flower strip	7	F	0.0122	0.0118	0.0004	4	3.27869	0.0327869	3.16	1.77764	365022	604.17	10
362	6	flower strip	7	F	0.0134	0.0116	0.0018	18	13.4328	0.134328	3.12	1.76635	365022	604.17	10
363	6	flower strip	7	F	0.011	0.0094	0.0016	16	14.5455	0.145455	3	1.73205	365022	604.17	10
364	6	flower strip	7	F	0.013	0.0116	0.0014	14	10.7692	0.107692	3.16	1.77764	365022	604.17	10
365	6	flower strip	7	F	0.0138	0.0111	0.0027	27	19.5652	0.195652	3.12	1.76635	365022	604.17	10
366	6	flower strip	7	F	0.013	0.011	0.002	20	15.3846	0.153846	3.08	1.75499	365022	604.17	10
367	6	flower strip	7	F	0.0105	0.0094	0.0011	11	10.4762	0.104762	3	1.73205	365022	604.17	10
368	6	flower strip	7	F	0.0106	0.0101	0.0005	5	4.71698	0.0471698	3.04	1.74356	365022	604.17	10
369	6	flower strip	8	F	0.012	0.011	0.001	10	8.33333	0.0833333	3.08	1.75499	115104	339.27	10
370	6	flower strip	8	F	0.0117	0.0106	0.0011	11	9.40171	0.0940171	3.12	1.76635	115104	339.27	10
371	6	flower strip	8	F	0.0132	0.0118	0.0014	14	10.6061	0.106061	3.16	1.77764	115104	339.27	10
372	6	flower strip	8	F	0.0142	0.012	0.0022	22	15.493	0.15493	3.2	1.78885	115104	339.27	10
373	6	flower strip	8	F	0.0128	0.011	0.0018	18	14.0625	0.140625	3.04	1.74356	115104	339.27	10
374	6	flower strip	8	F	0.0134	0.0118	0.0016	16	11.9403	0.119403	3.12	1.76635	115104	339.27	10
375	6	flower strip	8	F	0.0131	0.0113	0.0018	18	13.7405	0.137405	3.08	1.75499	115104	339.27	10
376	6	flower strip	8	F	0.0118	0.01	0.0018	18	15.2542	0.152542	2.96	1.72047	115104	339.27	10
377	6	flower strip	9	F	0.0151	0.0136	0.0015	15	9.93377	0.0993377	3.28	1.81108	28381.8	168.469	10
378	6	flower strip	9	F	0.0129	0.0127	0.0002	2	1.55039	0.0155039	3.2	1.78885	28381.8	168.469	10
379	6	flower strip	9	F	0.0132	0.0122	0.001	10	7.57576	0.0757576	3.16	1.77764	28381.8	168.469	10
380	6	flower strip	9	F	0.0146	0.0125	0.0021	21	14.3836	0.143836	3.2	1.78885	28381.8	168.469	10
381	6	flower strip	9	F	0.0115	0.0095	0.002	20	17.3913	0.173913	3.04	1.74356	28381.8	168.469	10
382	6	flower strip	9	F	0.0099	0.0089	0.001	10	10.101	0.10101	2.92	1.7088	28381.8	168.469	10
383	6	flower strip	9	F	0.0107	0.0095	0.0012	12	11.215	0.11215	3	1.73205	28381.8	168.469	10
384	6	flower strip	9	F	0.0112	0.0098	0.0014	14	12.5	0.125	3	1.73205	28381.8	168.469	10
385	1	no flower strip	2	F	0.0149	0.0133	0.0016	16	10.7383	0.107383	3.32	1.82209	2.80152e+06	1673.77	35
386	1	no flower strip	2	F	0.0163	0.014	0.0023	23	14.1104	0.141104	3.36	1.83303	2.80152e+06	1673.77	35
387	1	no flower strip	2	F	0.02	0.016	0.004	40	20	0.2	3.44	1.85472	2.80152e+06	1673.77	35
388	1	no flower strip	2	F	0.0144	0.0125	0.0019	19	13.1944	0.131944	3.24	1.8	2.80152e+06	1673.77	35
389	1	no flower strip	2	F	0.0164	0.0139	0.0025	25	15.2439	0.152439	3.32	1.82209	2.80152e+06	1673.77	35
390	1	no flower strip	2	F	0.0136	0.012	0.0016	16	11.7647	0.117647	3.24	1.8	2.80152e+06	1673.77	35
391	1	no flower strip	2	F	0.0147	0.013	0.0017	17	11.5646	0.115646	3.2	1.78885	2.80152e+06	1673.77	35
392	1	no flower strip	2	F	0.0122	0.0114	0.0008	8	6.55738	0.0655738	3.2	1.78885	2.80152e+06	1673.77	35
393	1	no flower strip	3	F	0.013	0.0113	0.0017	17	13.0769	0.130769	3.12	1.76635	2.0837e+06	1443.5	35
394	1	no flower strip	3	F	0.0142	0.0121	0.0021	21	14.7887	0.147887	3.2	1.78885	2.0837e+06	1443.5	35
395	1	no flower strip	3	F	0.0137	0.011	0.0027	27	19.708	0.19708	3.16	1.77764	2.0837e+06	1443.5	35
396	1	no flower strip	3	F	0.0154	0.0127	0.0027	27	17.5325	0.175325	3.2	1.78885	2.0837e+06	1443.5	35
397	1	no flower strip	3	F	0.0152	0.012	0.0032	32	21.0526	0.210526	3.28	1.81108	2.0837e+06	1443.5	35
398	1	no flower strip	3	F	0.0134	0.011	0.0024	24	17.9104	0.179104	3.12	1.76635	2.0837e+06	1443.5	35
399	1	no flower strip	3	F	0.0131	0.0116	0.0015	15	11.4504	0.114504	3.24	1.8	2.0837e+06	1443.5	35
400	1	no flower strip	3	F	0.0128	0.0111	0.0017	17	13.2812	0.132812	3.12	1.76635	2.0837e+06	1443.5	35
401	1	no flower strip	4	F	0.0149	0.0131	0.0018	18	12.0805	0.120805	3.28	1.81108	1.29886e+06	1139.68	35
402	1	no flower strip	4	F	0.0137	0.011	0.0027	27	19.708	0.19708	3.16	1.77764	1.29886e+06	1139.68	35
403	1	no flower strip	4	F	0.0137	0.012	0.0017	17	12.4088	0.124088	3.24	1.8	1.29886e+06	1139.68	35
404	1	no flower strip	4	F	0.0129	0.0112	0.0017	17	13.1783	0.131783	3.24	1.8	1.29886e+06	1139.68	35
405	1	no flower strip	4	F	0.0134	0.0112	0.0022	22	16.4179	0.164179	3.2	1.78885	1.29886e+06	1139.68	35
406	1	no flower strip	4	F	0.0127	0.0112	0.0015	15	11.811	0.11811	3.16	1.77764	1.29886e+06	1139.68	35
407	1	no flower strip	4	F	0.0141	0.0128	0.0013	13	9.21986	0.0921986	3.28	1.81108	1.29886e+06	1139.68	35
408	1	no flower strip	4	F	0.0123	0.0101	0.0022	22	17.8862	0.178862	3.04	1.74356	1.29886e+06	1139.68	35
409	1	no flower strip	5	F	0.0136	0.0116	0.002	20	14.7059	0.147059	3.16	1.77764	811641	900.911	35
410	1	no flower strip	5	F	0.015	0.0125	0.0025	25	16.6667	0.166667	3.24	1.8	811641	900.911	35
411	1	no flower strip	5	F	0.013	0.0116	0.0014	14	10.7692	0.107692	3.2	1.78885	811641	900.911	35
412	1	no flower strip	5	F	0.0126	0.0106	0.002	20	15.873	0.15873	3.08	1.75499	811641	900.911	35
413	1	no flower strip	5	F	0.012	0.0103	0.0017	17	14.1667	0.141667	3.08	1.75499	811641	900.911	35
414	1	no flower strip	5	F	0.0112	0.0095	0.0017	17	15.1786	0.151786	3	1.73205	811641	900.911	35
415	1	no flower strip	5	F	0.0099	0.0084	0.0015	15	15.1515	0.151515	2.92	1.7088	811641	900.911	35
416	1	no flower strip	5	F	0.0125	0.0105	0.002	20	16	0.16	3.12	1.76635	811641	900.911	35
417	1	no flower strip	6	F	0.0142	0.0119	0.0023	23	16.1972	0.161972	3.2	1.78885	129295	359.576	35
418	1	no flower strip	6	F	0.0135	0.0115	0.002	20	14.8148	0.148148	3.16	1.77764	129295	359.576	35
419	1	no flower strip	6	F	0.0099	0.0088	0.0011	11	11.1111	0.111111	2.92	1.7088	129295	359.576	35
420	1	no flower strip	6	F	0.0142	0.0117	0.0025	25	17.6056	0.176056	3.16	1.77764	129295	359.576	35
421	1	no flower strip	6	F	0.0141	0.0111	0.003	30	21.2766	0.212766	3.2	1.78885	129295	359.576	35
422	1	no flower strip	6	F	0.0128	0.0109	0.0019	19	14.8438	0.148438	3.08	1.75499	129295	359.576	35
423	1	no flower strip	6	F	0.0113	0.0098	0.0015	15	13.2743	0.132743	3.04	1.74356	129295	359.576	35
424	1	no flower strip	6	F	0.0066	0.0059	0.0007	7	10.6061	0.106061	2.64	1.62481	129295	359.576	35
425	1	no flower strip	7	F	0.0136	0.0121	0.0015	15	11.0294	0.110294	3.16	1.77764	257013	506.965	35
426	1	no flower strip	7	F	0.0145	0.0121	0.0024	24	16.5517	0.165517	3.2	1.78885	257013	506.965	35
427	1	no flower strip	7	F	0.0152	0.0132	0.002	20	13.1579	0.131579	3.28	1.81108	257013	506.965	35
428	1	no flower strip	7	F	0.0165	0.0145	0.002	20	12.1212	0.121212	3.36	1.83303	257013	506.965	35
429	1	no flower strip	7	F	0.0079	0.0066	0.0013	13	16.4557	0.164557	2.76	1.66132	257013	506.965	35
430	1	no flower strip	7	F	0.0082	0.0073	0.0009	9	10.9756	0.109756	2.8	1.67332	257013	506.965	35
431	1	no flower strip	7	F	0.0099	0.0087	0.0012	12	12.1212	0.121212	2.84	1.68523	257013	506.965	35
432	1	no flower strip	7	F	0.0119	0.0102	0.0017	17	14.2857	0.142857	3.04	1.74356	257013	506.965	35
433	1	no flower strip	8	F	0.0125	0.0109	0.0016	16	12.8	0.128	3.08	1.75499	219959	468.998	35
434	1	no flower strip	8	F	0.0118	0.0096	0.0022	22	18.6441	0.186441	3.04	1.74356	219959	468.998	35
435	1	no flower strip	8	F	0.0134	0.011	0.0024	24	17.9104	0.179104	3.08	1.75499	219959	468.998	35
436	1	no flower strip	8	F	0.0118	0.0102	0.0016	16	13.5593	0.135593	3.04	1.74356	219959	468.998	35
437	1	no flower strip	8	F	0.0128	0.0106	0.0022	22	17.1875	0.171875	3.04	1.74356	219959	468.998	35
438	1	no flower strip	8	F	0.0117	0.01	0.0017	17	14.5299	0.145299	3.04	1.74356	219959	468.998	35
439	1	no flower strip	8	F	0.0122	0.0106	0.0016	16	13.1148	0.131148	3.08	1.75499	219959	468.998	35
440	1	no flower strip	8	F	0.0093	0.0081	0.0012	12	12.9032	0.129032	2.92	1.7088	219959	468.998	35
441	1	no flower strip	9	F	0.0142	0.0121	0.0021	21	14.7887	0.147887	3.2	1.78885	150581	388.048	35
442	1	no flower strip	9	F	0.0132	0.011	0.0022	22	16.6667	0.166667	3.08	1.75499	150581	388.048	35
443	1	no flower strip	9	F	0.0105	0.0098	0.0007	7	6.66667	0.0666667	3	1.73205	150581	388.048	35
444	1	no flower strip	9	F	0.0093	0.008	0.0013	13	13.9785	0.139785	2.8	1.67332	150581	388.048	35
445	1	no flower strip	9	F	0.0099	0.0081	0.0018	18	18.1818	0.181818	2.88	1.69706	150581	388.048	35
446	1	no flower strip	9	F	0.0098	0.0083	0.0015	15	15.3061	0.153061	2.88	1.69706	150581	388.048	35
447	1	no flower strip	9	F	0.0111	0.0095	0.0016	16	14.4144	0.144144	3	1.73205	150581	388.048	35
448	1	no flower strip	9	F	0.01	0.0086	0.0014	14	14	0.14	2.88	1.69706	150581	388.048	35
449	2	flower strip	2	F	0.0148	0.0132	0.0016	16	10.8108	0.108108	3.32	1.82209	1.66112e+06	1288.85	100
450	2	flower strip	2	F	0.0148	0.0121	0.0027	27	18.2432	0.182432	3.2	1.78885	1.66112e+06	1288.85	100
451	2	flower strip	2	F	0.0145	0.012	0.0025	25	17.2414	0.172414	3.2	1.78885	1.66112e+06	1288.85	100
452	2	flower strip	2	F	0.0144	0.0121	0.0023	23	15.9722	0.159722	3.2	1.78885	1.66112e+06	1288.85	100
453	2	flower strip	2	F	0.0139	0.0115	0.0024	24	17.2662	0.172662	3.16	1.77764	1.66112e+06	1288.85	100
454	2	flower strip	2	F	0.0138	0.0123	0.0015	15	10.8696	0.108696	3.2	1.78885	1.66112e+06	1288.85	100
455	2	flower strip	2	F	0.0142	0.0118	0.0024	24	16.9014	0.169014	3.16	1.77764	1.66112e+06	1288.85	100
456	2	flower strip	2	F	0.0133	0.0114	0.0019	19	14.2857	0.142857	3.16	1.77764	1.66112e+06	1288.85	100
457	2	flower strip	3	F	0.0144	0.0119	0.0025	25	17.3611	0.173611	3.2	1.78885	1.34932e+06	1161.6	100
458	2	flower strip	3	F	0.0128	0.0114	0.0014	14	10.9375	0.109375	3.16	1.77764	1.34932e+06	1161.6	100
459	2	flower strip	3	F	0.0144	0.012	0.0024	24	16.6667	0.166667	3.2	1.78885	1.34932e+06	1161.6	100
460	2	flower strip	3	F	0.0152	0.0126	0.0026	26	17.1053	0.171053	3.28	1.81108	1.34932e+06	1161.6	100
461	2	flower strip	3	F	0.0164	0.0129	0.0035	35	21.3415	0.213415	3.24	1.8	1.34932e+06	1161.6	100
462	2	flower strip	3	F	0.015	0.0132	0.0018	18	12	0.12	3.24	1.8	1.34932e+06	1161.6	100
463	2	flower strip	3	F	0.0125	0.0111	0.0014	14	11.2	0.112	3.12	1.76635	1.34932e+06	1161.6	100
464	2	flower strip	3	F	0.011	0.0096	0.0014	14	12.7273	0.127273	2.96	1.72047	1.34932e+06	1161.6	100
465	2	flower strip	4	F	0.0127	0.0106	0.0021	21	16.5354	0.165354	3.04	1.74356	478549	691.772	100
466	2	flower strip	4	F	0.0144	0.0118	0.0026	26	18.0556	0.180556	3.16	1.77764	478549	691.772	100
467	2	flower strip	4	F	0.0156	0.0132	0.0024	24	15.3846	0.153846	3.24	1.8	478549	691.772	100
468	2	flower strip	4	F	0.014	0.0118	0.0022	22	15.7143	0.157143	3.12	1.76635	478549	691.772	100
469	2	flower strip	4	F	0.0141	0.0122	0.0019	19	13.4752	0.134752	3.24	1.8	478549	691.772	100
470	2	flower strip	4	F	0.0145	0.0118	0.0027	27	18.6207	0.186207	3.12	1.76635	478549	691.772	100
471	2	flower strip	4	F	0.0136	0.0118	0.0018	18	13.2353	0.132353	3.2	1.78885	478549	691.772	100
472	2	flower strip	4	F	0.0142	0.0123	0.0019	19	13.3803	0.133803	3.16	1.77764	478549	691.772	100
473	2	flower strip	5	F	0.0134	0.0113	0.0021	21	15.6716	0.156716	3.12	1.76635	514420	717.231	100
474	2	flower strip	5	F	0.0132	0.0119	0.0013	13	9.84848	0.0984848	3.24	1.8	514420	717.231	100
475	2	flower strip	5	F	0.0166	0.0134	0.0032	32	19.2771	0.192771	3.28	1.81108	514420	717.231	100
476	2	flower strip	5	F	0.0145	0.0133	0.0012	12	8.27586	0.0827586	3.32	1.82209	514420	717.231	100
477	2	flower strip	5	F	0.0119	0.0101	0.0018	18	15.1261	0.151261	3.08	1.75499	514420	717.231	100
478	2	flower strip	5	F	0.0121	0.0108	0.0013	13	10.7438	0.107438	3.12	1.76635	514420	717.231	100
479	2	flower strip	5	F	0.014	0.0121	0.0019	19	13.5714	0.135714	3.16	1.77764	514420	717.231	100
480	2	flower strip	5	F	0.0107	0.0093	0.0014	14	13.0841	0.130841	2.92	1.7088	514420	717.231	100
481	2	flower strip	6	F	0.0108	0.0091	0.0017	17	15.7407	0.157407	2.96	1.72047	650416	806.484	100
482	2	flower strip	6	F	0.0153	0.0125	0.0028	28	18.3007	0.183007	3.2	1.78885	650416	806.484	100
483	2	flower strip	6	F	0.0111	0.0104	0.0007	7	6.30631	0.0630631	3.04	1.74356	650416	806.484	100
484	2	flower strip	6	F	0.0141	0.0123	0.0018	18	12.766	0.12766	3.16	1.77764	650416	806.484	100
485	2	flower strip	6	F	0.0143	0.0119	0.0024	24	16.7832	0.167832	3.16	1.77764	650416	806.484	100
486	2	flower strip	6	F	0.0122	0.0108	0.0014	14	11.4754	0.114754	3.04	1.74356	650416	806.484	100
487	2	flower strip	6	F	0.0153	0.012	0.0033	33	21.5686	0.215686	3.16	1.77764	650416	806.484	100
488	2	flower strip	6	F	0.0132	0.0108	0.0024	24	18.1818	0.181818	3.08	1.75499	650416	806.484	100
489	2	flower strip	7	F	0.0107	0.0097	0.001	10	9.34579	0.0934579	3.04	1.74356	583798	764.067	100
490	2	flower strip	7	F	0.0115	0.0112	0.0003	3	2.6087	0.026087	3.16	1.77764	583798	764.067	100
491	2	flower strip	7	F	0.014	0.0122	0.0018	18	12.8571	0.128571	3.28	1.81108	583798	764.067	100
492	2	flower strip	7	F	0.0124	0.0113	0.0011	11	8.87097	0.0887097	3.16	1.77764	583798	764.067	100
493	2	flower strip	7	F	0.0119	0.0108	0.0011	11	9.2437	0.092437	3.12	1.76635	583798	764.067	100
494	2	flower strip	7	F	0.0116	0.0093	0.0023	23	19.8276	0.198276	2.96	1.72047	583798	764.067	100
495	2	flower strip	7	F	0.013	0.0113	0.0017	17	13.0769	0.130769	3.16	1.77764	583798	764.067	100
496	2	flower strip	7	F	0.0089	0.0081	0.0008	8	8.98876	0.0898876	2.88	1.69706	583798	764.067	100
497	2	flower strip	8	F	0.0135	0.0115	0.002	20	14.8148	0.148148	3.16	1.77764	187241	432.714	100
498	2	flower strip	8	F	0.0098	0.009	0.0008	8	8.16327	0.0816327	2.96	1.72047	187241	432.714	100
499	2	flower strip	8	F	0.0077	0.0069	0.0008	8	10.3896	0.103896	2.68	1.63707	187241	432.714	100
500	2	flower strip	8	F	0.0109	0.0095	0.0014	14	12.844	0.12844	3.04	1.74356	187241	432.714	100
501	2	flower strip	8	F	0.0144	0.0118	0.0026	26	18.0556	0.180556	3.2	1.78885	187241	432.714	100
502	2	flower strip	8	F	0.0107	0.0101	0.0006	6	5.60748	0.0560748	3.04	1.74356	187241	432.714	100
503	2	flower strip	8	F	0.0124	0.0101	0.0023	23	18.5484	0.185484	3.04	1.74356	187241	432.714	100
504	2	flower strip	8	F	0.0107	0.0097	0.001	10	9.34579	0.0934579	3	1.73205	187241	432.714	100
505	2	flower strip	9	F	0.0091	0.0086	0.0005	5	5.49451	0.0549451	2.92	1.7088	111162	333.41	100
506	2	flower strip	9	F	0.0111	0.0092	0.0019	19	17.1171	0.171171	3	1.73205	111162	333.41	100
507	2	flower strip	9	F	0.0122	0.0097	0.0025	25	20.4918	0.204918	3.08	1.75499	111162	333.41	100
508	2	flower strip	9	F	0.0123	0.0101	0.0022	22	17.8862	0.178862	3.08	1.75499	111162	333.41	100
509	2	flower strip	9	F	0.0149	0.0121	0.0028	28	18.7919	0.187919	3.2	1.78885	111162	333.41	100
510	2	flower strip	9	F	0.0104	0.0089	0.0015	15	14.4231	0.144231	2.96	1.72047	111162	333.41	100
511	2	flower strip	9	F	0.0102	0.0088	0.0014	14	13.7255	0.137255	2.96	1.72047	111162	333.41	100
512	2	flower strip	9	F	0.0063	0.0056	0.0007	7	11.1111	0.111111	2.56	1.6	111162	333.41	100
513	3	no flower strip	2	F	0.0152	0.0126	0.0026	26	17.1053	0.171053	3.28	1.81108	1.00282e+06	1001.41	10
514	3	no flower strip	2	F	0.0138	0.0123	0.0015	15	10.8696	0.108696	3.2	1.78885	1.00282e+06	1001.41	10
515	3	no flower strip	2	F	0.0138	0.0109	0.0029	29	21.0145	0.210145	3.24	1.8	1.00282e+06	1001.41	10
516	3	no flower strip	2	F	0.0156	0.013	0.0026	26	16.6667	0.166667	3.2	1.78885	1.00282e+06	1001.41	10
517	3	no flower strip	2	F	0.0144	0.0122	0.0022	22	15.2778	0.152778	3.2	1.78885	1.00282e+06	1001.41	10
518	3	no flower strip	2	F	0.0143	0.0121	0.0022	22	15.3846	0.153846	3.2	1.78885	1.00282e+06	1001.41	10
519	3	no flower strip	2	F	0.0145	0.0124	0.0021	21	14.4828	0.144828	3.24	1.8	1.00282e+06	1001.41	10
520	3	no flower strip	2	F	0.0129	0.0108	0.0021	21	16.2791	0.162791	3.2	1.78885	1.00282e+06	1001.41	10
521	3	no flower strip	3	F	0.0133	0.011	0.0023	23	17.2932	0.172932	3.16	1.77764	882595	939.465	10
522	3	no flower strip	3	F	0.0145	0.0122	0.0023	23	15.8621	0.158621	3.24	1.8	882595	939.465	10
523	3	no flower strip	3	F	0.014	0.0117	0.0023	23	16.4286	0.164286	3.2	1.78885	882595	939.465	10
524	3	no flower strip	3	F	0.0142	0.0118	0.0024	24	16.9014	0.169014	3.2	1.78885	882595	939.465	10
525	3	no flower strip	3	F	0.0157	0.0125	0.0032	32	20.3822	0.203822	3.28	1.81108	882595	939.465	10
526	3	no flower strip	3	F	0.0153	0.0123	0.003	30	19.6078	0.196078	3.24	1.8	882595	939.465	10
527	3	no flower strip	3	F	0.0152	0.0132	0.002	20	13.1579	0.131579	3.32	1.82209	882595	939.465	10
528	3	no flower strip	3	F	0.0146	0.0121	0.0025	25	17.1233	0.171233	3.28	1.81108	882595	939.465	10
529	3	no flower strip	4	F	0.0145	0.012	0.0025	25	17.2414	0.172414	3.24	1.8	259378	509.292	10
530	3	no flower strip	4	F	0.0157	0.0134	0.0023	23	14.6497	0.146497	3.24	1.8	259378	509.292	10
531	3	no flower strip	4	F	0.0134	0.0108	0.0026	26	19.403	0.19403	3.12	1.76635	259378	509.292	10
532	3	no flower strip	4	F	0.0154	0.0125	0.0029	29	18.8312	0.188312	3.28	1.81108	259378	509.292	10
533	3	no flower strip	4	F	0.0123	0.0105	0.0018	18	14.6341	0.146341	3.04	1.74356	259378	509.292	10
534	3	no flower strip	4	F	0.0108	0.0092	0.0016	16	14.8148	0.148148	3	1.73205	259378	509.292	10
535	3	no flower strip	4	F	0.012	0.0111	0.0009	9	7.5	0.075	3.08	1.75499	259378	509.292	10
536	3	no flower strip	4	F	0.0097	0.0083	0.0014	14	14.433	0.14433	2.88	1.69706	259378	509.292	10
537	3	no flower strip	5	F	0.0154	0.0127	0.0027	27	17.5325	0.175325	3.24	1.8	13402.5	115.769	10
538	3	no flower strip	5	F	0.0156	0.013	0.0026	26	16.6667	0.166667	3.24	1.8	13402.5	115.769	10
539	3	no flower strip	5	F	0.0135	0.0116	0.0019	19	14.0741	0.140741	3.2	1.78885	13402.5	115.769	10
540	3	no flower strip	5	F	0.0135	0.011	0.0025	25	18.5185	0.185185	3.12	1.76635	13402.5	115.769	10
541	3	no flower strip	5	F	0.0133	0.0109	0.0024	24	18.0451	0.180451	3.12	1.76635	13402.5	115.769	10
542	3	no flower strip	5	F	0.0122	0.011	0.0012	12	9.83607	0.0983607	3.16	1.77764	13402.5	115.769	10
543	3	no flower strip	5	F	0.0125	0.0108	0.0017	17	13.6	0.136	3.12	1.76635	13402.5	115.769	10
544	3	no flower strip	5	F	0.0106	0.0096	0.001	10	9.43396	0.0943396	3	1.73205	13402.5	115.769	10
545	3	no flower strip	6	F	0.0118	0.0105	0.0013	13	11.0169	0.110169	3.08	1.75499	42572.7	206.332	10
546	3	no flower strip	6	F	0.012	0.0101	0.0019	19	15.8333	0.158333	3.08	1.75499	42572.7	206.332	10
547	3	no flower strip	6	F	0.0105	0.0099	0.0006	6	5.71429	0.0571429	3	1.73205	42572.7	206.332	10
548	3	no flower strip	6	F	0.0146	0.0124	0.0022	22	15.0685	0.150685	3.2	1.78885	42572.7	206.332	10
549	3	no flower strip	6	F	0.0103	0.0093	0.001	10	9.70874	0.0970874	3	1.73205	42572.7	206.332	10
550	3	no flower strip	6	F	0.0137	0.0115	0.0022	22	16.0584	0.160584	3.16	1.77764	42572.7	206.332	10
551	3	no flower strip	6	F	0.0122	0.0102	0.002	20	16.3934	0.163934	3.08	1.75499	42572.7	206.332	10
552	3	no flower strip	6	F	0.011	0.0094	0.0016	16	14.5455	0.145455	2.96	1.72047	42572.7	206.332	10
553	3	no flower strip	7	F	0.0145	0.0116	0.0029	29	20	0.2	3.16	1.77764	11825.8	108.746	10
554	3	no flower strip	7	F	0.0116	0.0101	0.0015	15	12.931	0.12931	3	1.73205	11825.8	108.746	10
555	3	no flower strip	7	F	0.0096	0.0086	0.001	10	10.4167	0.104167	2.96	1.72047	11825.8	108.746	10
556	3	no flower strip	7	F	0.0103	0.0092	0.0011	11	10.6796	0.106796	2.92	1.7088	11825.8	108.746	10
557	3	no flower strip	7	F	0.0139	0.0116	0.0023	23	16.5468	0.165468	3.12	1.76635	11825.8	108.746	10
558	3	no flower strip	7	F	0.0116	0.0101	0.0015	15	12.931	0.12931	3.08	1.75499	11825.8	108.746	10
559	3	no flower strip	7	F	0.0156	0.0127	0.0029	29	18.5897	0.185897	3.2	1.78885	11825.8	108.746	10
560	3	no flower strip	7	F	0.0132	0.0112	0.002	20	15.1515	0.151515	3.08	1.75499	11825.8	108.746	10
561	3	no flower strip	8	F	0.0125	0.0099	0.0026	26	20.8	0.208	3.04	1.74356	0	0	10
562	3	no flower strip	8	F	0.0087	0.0077	0.001	10	11.4943	0.114943	2.84	1.68523	0	0	10
563	3	no flower strip	8	F	0.0076	0.0064	0.0012	12	15.7895	0.157895	2.68	1.63707	0	0	10
564	3	no flower strip	8	F	0.0115	0.0104	0.0011	11	9.56522	0.0956522	3.08	1.75499	0	0	10
565	3	no flower strip	8	F	0.0126	0.011	0.0016	16	12.6984	0.126984	3.16	1.77764	0	0	10
566	3	no flower strip	8	F	0.0122	0.011	0.0012	12	9.83607	0.0983607	3.12	1.76635	0	0	10
567	3	no flower strip	8	F	0.0113	0.01	0.0013	13	11.5044	0.115044	3.04	1.74356	0	0	10
568	3	no flower strip	8	F	0.0079	0.0073	0.0006	6	7.59494	0.0759494	2.76	1.66132	0	0	10
569	3	no flower strip	9	F	0.0086	0.0073	0.0013	13	15.1163	0.151163	2.72	1.64924	0	0	10
570	3	no flower strip	9	F	0.0122	0.0105	0.0017	17	13.9344	0.139344	3.08	1.75499	0	0	10
571	3	no flower strip	9	F	0.0107	0.0093	0.0014	14	13.0841	0.130841	2.96	1.72047	0	0	10
572	3	no flower strip	9	F	0.0099	0.0082	0.0017	17	17.1717	0.171717	2.92	1.7088	0	0	10
573	3	no flower strip	9	F	0.0092	0.0087	0.0005	5	5.43478	0.0543478	2.84	1.68523	0	0	10
574	3	no flower strip	9	F	0.0118	0.0097	0.0021	21	17.7966	0.177966	3	1.73205	0	0	10
575	3	no flower strip	9	F	0.0089	0.0077	0.0012	12	13.4831	0.134831	2.8	1.67332	0	0	10
576	3	no flower strip	9	F	0.0086	0.0076	0.001	10	11.6279	0.116279	2.72	1.64924	0	0	10
577	4	flower strip	2	F	0.0153	0.0129	0.0024	24	15.6863	0.156863	3.24	1.8	1.53459e+06	1238.79	320
578	4	flower strip	2	F	0.0148	0.0117	0.0031	31	20.9459	0.209459	3.2	1.78885	1.53459e+06	1238.79	320
579	4	flower strip	2	F	0.0142	0.0121	0.0021	21	14.7887	0.147887	3.24	1.8	1.53459e+06	1238.79	320
580	4	flower strip	2	F	0.017	0.0138	0.0032	32	18.8235	0.188235	3.28	1.81108	1.53459e+06	1238.79	320
581	4	flower strip	2	F	0.0126	0.0114	0.0012	12	9.52381	0.0952381	3.08	1.75499	1.53459e+06	1238.79	320
582	4	flower strip	2	F	0.0145	0.0124	0.0021	21	14.4828	0.144828	3.24	1.8	1.53459e+06	1238.79	320
583	4	flower strip	2	F	0.0102	0.0078	0.0024	24	23.5294	0.235294	2.88	1.69706	1.53459e+06	1238.79	320
584	4	flower strip	2	F	0.0132	0.0112	0.002	20	15.1515	0.151515	3.12	1.76635	1.53459e+06	1238.79	320
585	4	flower strip	3	F	0.0157	0.0139	0.0018	18	11.465	0.11465	3.32	1.82209	888508	942.607	320
586	4	flower strip	3	F	0.0128	0.0111	0.0017	17	13.2812	0.132812	3.12	1.76635	888508	942.607	320
587	4	flower strip	3	F	0.0146	0.0122	0.0024	24	16.4384	0.164384	3.2	1.78885	888508	942.607	320
588	4	flower strip	3	F	0.016	0.0134	0.0026	26	16.25	0.1625	3.24	1.8	888508	942.607	320
589	4	flower strip	3	F	0.0167	0.0134	0.0033	33	19.7605	0.197605	3.28	1.81108	888508	942.607	320
590	4	flower strip	3	F	0.0136	0.0116	0.002	20	14.7059	0.147059	3.2	1.78885	888508	942.607	320
591	4	flower strip	3	F	0.0139	0.0109	0.003	30	21.5827	0.215827	3.16	1.77764	888508	942.607	320
592	4	flower strip	3	F	0.0075	0.0058	0.0017	17	22.6667	0.226667	2.64	1.62481	888508	942.607	320
593	4	flower strip	4	F	0.013	0.0107	0.0023	23	17.6923	0.176923	3.08	1.75499	216805	465.624	320
594	4	flower strip	4	F	0.0118	0.0101	0.0017	17	14.4068	0.144068	3.08	1.75499	216805	465.624	320
595	4	flower strip	4	F	0.0154	0.0133	0.0021	21	13.6364	0.136364	3.24	1.8	216805	465.624	320
596	4	flower strip	4	F	0.0141	0.0122	0.0019	19	13.4752	0.134752	3.2	1.78885	216805	465.624	320
597	4	flower strip	4	F	0.0127	0.011	0.0017	17	13.3858	0.133858	3.12	1.76635	216805	465.624	320
598	4	flower strip	4	F	0.0127	0.0111	0.0016	16	12.5984	0.125984	3.12	1.76635	216805	465.624	320
599	4	flower strip	4	F	0.0163	0.0133	0.003	30	18.4049	0.184049	3.28	1.81108	216805	465.624	320
600	4	flower strip	4	F	0.012	0.0103	0.0017	17	14.1667	0.141667	3.04	1.74356	216805	465.624	320
601	4	flower strip	5	F	0.0118	0.0105	0.0013	13	11.0169	0.110169	3.08	1.75499	9066.41	95.2177	320
602	4	flower strip	5	F	0.0136	0.011	0.0026	26	19.1176	0.191176	3.12	1.76635	9066.41	95.2177	320
603	4	flower strip	5	F	0.0148	0.0121	0.0027	27	18.2432	0.182432	3.16	1.77764	9066.41	95.2177	320
604	4	flower strip	5	F	0.017	0.014	0.003	30	17.6471	0.176471	3.32	1.82209	9066.41	95.2177	320
605	4	flower strip	5	F	0.0154	0.0125	0.0029	29	18.8312	0.188312	3.24	1.8	9066.41	95.2177	320
606	4	flower strip	5	F	0.0128	0.0109	0.0019	19	14.8438	0.148438	3.08	1.75499	9066.41	95.2177	320
607	4	flower strip	5	F	0.0136	0.0118	0.0018	18	13.2353	0.132353	3.16	1.77764	9066.41	95.2177	320
608	4	flower strip	5	F	0.0079	0.0057	0.0022	22	27.8481	0.278481	2.76	1.66132	9066.41	95.2177	320
609	4	flower strip	6	F	0.0148	0.0127	0.0021	21	14.1892	0.141892	3.2	1.78885	113527	336.938	320
610	4	flower strip	6	F	0.0137	0.0116	0.0021	21	15.3285	0.153285	3.24	1.8	113527	336.938	320
611	4	flower strip	6	F	0.0141	0.0123	0.0018	18	12.766	0.12766	3.2	1.78885	113527	336.938	320
612	4	flower strip	6	F	0.0126	0.011	0.0016	16	12.6984	0.126984	3.12	1.76635	113527	336.938	320
613	4	flower strip	6	F	0.0159	0.0127	0.0032	32	20.1258	0.201258	3.28	1.81108	113527	336.938	320
614	4	flower strip	6	F	0.0124	0.0108	0.0016	16	12.9032	0.129032	3.08	1.75499	113527	336.938	320
615	4	flower strip	6	F	0.014	0.0116	0.0024	24	17.1429	0.171429	3.16	1.77764	113527	336.938	320
616	4	flower strip	6	F	0.0097	0.0083	0.0014	14	14.433	0.14433	2.88	1.69706	113527	336.938	320
617	4	flower strip	7	F	0.0135	0.0118	0.0017	17	12.5926	0.125926	3.12	1.76635	65435.8	255.804	320
618	4	flower strip	7	F	0.0142	0.0112	0.003	30	21.1268	0.211268	3.12	1.76635	65435.8	255.804	320
619	4	flower strip	7	F	0.0132	0.0117	0.0015	15	11.3636	0.113636	3.2	1.78885	65435.8	255.804	320
620	4	flower strip	7	F	0.0133	0.0111	0.0022	22	16.5414	0.165414	3.08	1.75499	65435.8	255.804	320
621	4	flower strip	7	F	0.0165	0.0137	0.0028	28	16.9697	0.169697	3.28	1.81108	65435.8	255.804	320
622	4	flower strip	7	F	0.0109	0.0094	0.0015	15	13.7615	0.137615	2.96	1.72047	65435.8	255.804	320
623	4	flower strip	7	F	0.0146	0.0123	0.0023	23	15.7534	0.157534	3.2	1.78885	65435.8	255.804	320
624	4	flower strip	7	F	0.0087	0.0071	0.0016	16	18.3908	0.183908	2.72	1.64924	65435.8	255.804	320
625	4	flower strip	8	F	0.0137	0.011	0.0027	27	19.708	0.19708	3.08	1.75499	56369.4	237.422	320
626	4	flower strip	8	F	0.017	0.0139	0.0031	31	18.2353	0.182353	3.32	1.82209	56369.4	237.422	320
627	4	flower strip	8	F	0.0159	0.0126	0.0033	33	20.7547	0.207547	3.16	1.77764	56369.4	237.422	320
628	4	flower strip	8	F	0.0122	0.0108	0.0014	14	11.4754	0.114754	3.08	1.75499	56369.4	237.422	320
629	4	flower strip	8	F	0.0125	0.0102	0.0023	23	18.4	0.184	3.04	1.74356	56369.4	237.422	320
630	4	flower strip	8	F	0.013	0.0108	0.0022	22	16.9231	0.169231	3.08	1.75499	56369.4	237.422	320
631	4	flower strip	8	F	0.0145	0.0116	0.0029	29	20	0.2	3.16	1.77764	56369.4	237.422	320
632	4	flower strip	8	F	0.0094	0.0075	0.0019	19	20.2128	0.202128	2.88	1.69706	56369.4	237.422	320
633	4	flower strip	9	F	0.0123	0.01	0.0023	23	18.6992	0.186992	3.04	1.74356	0	0	320
634	4	flower strip	9	F	0.0123	0.0113	0.001	10	8.13008	0.0813008	3.2	1.78885	0	0	320
635	5	no flower strip	2	F	0.0162	0.0135	0.0027	27	16.6667	0.166667	3.24	1.8	2.82202e+06	1679.89	330
636	5	no flower strip	2	F	0.0162	0.0143	0.0019	19	11.7284	0.117284	3.32	1.82209	2.82202e+06	1679.89	330
637	5	no flower strip	2	F	0.0165	0.0139	0.0026	26	15.7576	0.157576	3.32	1.82209	2.82202e+06	1679.89	330
638	5	no flower strip	2	F	0.0165	0.0145	0.002	20	12.1212	0.121212	3.28	1.81108	2.82202e+06	1679.89	330
639	5	no flower strip	2	F	0.0125	0.0111	0.0014	14	11.2	0.112	3.12	1.76635	2.82202e+06	1679.89	330
640	5	no flower strip	2	F	0.0149	0.0133	0.0016	16	10.7383	0.107383	3.24	1.8	2.82202e+06	1679.89	330
641	5	no flower strip	2	F	0.017	0.0147	0.0023	23	13.5294	0.135294	3.4	1.84391	2.82202e+06	1679.89	330
642	5	no flower strip	2	F	0.012	0.0099	0.0021	21	17.5	0.175	2.92	1.7088	2.82202e+06	1679.89	330
643	5	no flower strip	3	F	0.0126	0.0109	0.0017	17	13.4921	0.134921	3.04	1.74356	842388	917.817	330
644	5	no flower strip	3	F	0.0133	0.0109	0.0024	24	18.0451	0.180451	3.12	1.76635	842388	917.817	330
645	5	no flower strip	3	F	0.0135	0.0116	0.0019	19	14.0741	0.140741	3.12	1.76635	842388	917.817	330
646	5	no flower strip	3	F	0.0155	0.0133	0.0022	22	14.1935	0.141935	3.24	1.8	842388	917.817	330
647	5	no flower strip	3	F	0.0124	0.0103	0.0021	21	16.9355	0.169355	3.04	1.74356	842388	917.817	330
648	5	no flower strip	3	F	0.0149	0.0126	0.0023	23	15.4362	0.154362	3.16	1.77764	842388	917.817	330
649	5	no flower strip	3	F	0.0106	0.0093	0.0013	13	12.2642	0.122642	2.92	1.7088	842388	917.817	330
650	5	no flower strip	3	F	0.0122	0.0103	0.0019	19	15.5738	0.155738	3.08	1.75499	842388	917.817	330
651	5	no flower strip	4	F	0.0135	0.0122	0.0013	13	9.62963	0.0962963	3.2	1.78885	812429	901.349	330
652	5	no flower strip	4	F	0.0116	0.0102	0.0014	14	12.069	0.12069	3.08	1.75499	812429	901.349	330
653	5	no flower strip	4	F	0.013	0.0109	0.0021	21	16.1538	0.161538	3.08	1.75499	812429	901.349	330
654	5	no flower strip	4	F	0.0152	0.013	0.0022	22	14.4737	0.144737	3.24	1.8	812429	901.349	330
655	5	no flower strip	4	F	0.014	0.0123	0.0017	17	12.1429	0.121429	3.2	1.78885	812429	901.349	330
656	5	no flower strip	4	F	0.0125	0.011	0.0015	15	12	0.12	3.08	1.75499	812429	901.349	330
657	5	no flower strip	4	F	0.0086	0.0074	0.0012	12	13.9535	0.139535	2.8	1.67332	812429	901.349	330
658	5	no flower strip	4	F	0.0102	0.0086	0.0016	16	15.6863	0.156863	2.92	1.7088	812429	901.349	330
659	5	no flower strip	5	F	0.0114	0.0095	0.0019	19	16.6667	0.166667	3.04	1.74356	439130	662.669	330
660	5	no flower strip	5	F	0.0128	0.0108	0.002	20	15.625	0.15625	3.04	1.74356	439130	662.669	330
661	5	no flower strip	5	F	0.0137	0.0114	0.0023	23	16.7883	0.167883	3.12	1.76635	439130	662.669	330
662	5	no flower strip	5	F	0.0156	0.0133	0.0023	23	14.7436	0.147436	3.24	1.8	439130	662.669	330
663	5	no flower strip	5	F	0.0134	0.0112	0.0022	22	16.4179	0.164179	3.12	1.76635	439130	662.669	330
664	5	no flower strip	5	F	0.0146	0.0124	0.0022	22	15.0685	0.150685	3.16	1.77764	439130	662.669	330
665	5	no flower strip	5	F	0.0098	0.0088	0.001	10	10.2041	0.102041	2.92	1.7088	439130	662.669	330
666	5	no flower strip	5	F	0.013	0.0113	0.0017	17	13.0769	0.130769	3.04	1.74356	439130	662.669	330
667	5	no flower strip	6	F	0.0132	0.0108	0.0024	24	18.1818	0.181818	3.08	1.75499	413507	643.045	330
668	5	no flower strip	6	F	0.0161	0.0127	0.0034	34	21.118	0.21118	3.24	1.8	413507	643.045	330
669	5	no flower strip	6	F	0.0126	0.0103	0.0023	23	18.254	0.18254	3.08	1.75499	413507	643.045	330
670	5	no flower strip	6	F	0.0111	0.0104	0.0007	7	6.30631	0.0630631	3.04	1.74356	413507	643.045	330
671	5	no flower strip	6	F	0.0154	0.0132	0.0022	22	14.2857	0.142857	3.24	1.8	413507	643.045	330
672	5	no flower strip	6	F	0.0141	0.0122	0.0019	19	13.4752	0.134752	3.2	1.78885	413507	643.045	330
673	5	no flower strip	6	F	0.0127	0.0106	0.0021	21	16.5354	0.165354	3.12	1.76635	413507	643.045	330
674	5	no flower strip	6	F	0.0134	0.0115	0.0019	19	14.1791	0.141791	3.12	1.76635	413507	643.045	330
675	5	no flower strip	7	F	0.0116	0.0099	0.0017	17	14.6552	0.146552	3.04	1.74356	242822	492.77	330
676	5	no flower strip	7	F	0.0111	0.0093	0.0018	18	16.2162	0.162162	2.92	1.7088	242822	492.77	330
677	5	no flower strip	7	F	0.012	0.0101	0.0019	19	15.8333	0.158333	3.08	1.75499	242822	492.77	330
678	5	no flower strip	7	F	0.0109	0.0087	0.0022	22	20.1835	0.201835	2.92	1.7088	242822	492.77	330
679	5	no flower strip	7	F	0.0121	0.0094	0.0027	27	22.314	0.22314	3	1.73205	242822	492.77	330
680	5	no flower strip	7	F	0.0101	0.0081	0.002	20	19.802	0.19802	2.88	1.69706	242822	492.77	330
681	5	no flower strip	7	F	0.0126	0.0108	0.0018	18	14.2857	0.142857	3.12	1.76635	242822	492.77	330
682	5	no flower strip	7	F	0.0092	0.0073	0.0019	19	20.6522	0.206522	2.76	1.66132	242822	492.77	330
683	5	no flower strip	8	F	0.0103	0.0085	0.0018	18	17.4757	0.174757	2.84	1.68523	254254	504.236	330
684	5	no flower strip	8	F	0.0089	0.0077	0.0012	12	13.4831	0.134831	2.84	1.68523	254254	504.236	330
685	5	no flower strip	8	F	0.0105	0.0094	0.0011	11	10.4762	0.104762	2.96	1.72047	254254	504.236	330
686	5	no flower strip	8	F	0.0126	0.0103	0.0023	23	18.254	0.18254	3.08	1.75499	254254	504.236	330
687	5	no flower strip	8	F	0.0118	0.0099	0.0019	19	16.1017	0.161017	3	1.73205	254254	504.236	330
688	5	no flower strip	8	F	0.0109	0.0094	0.0015	15	13.7615	0.137615	3	1.73205	254254	504.236	330
689	5	no flower strip	8	F	0.009	0.0071	0.0019	19	21.1111	0.211111	2.76	1.66132	254254	504.236	330
690	5	no flower strip	8	F	0.0106	0.0094	0.0012	12	11.3208	0.113208	3.04	1.74356	254254	504.236	330
691	5	no flower strip	9	F	0.0117	0.0098	0.0019	19	16.2393	0.162393	3	1.73205	52427.5	228.971	330
692	5	no flower strip	9	F	0.0127	0.0107	0.002	20	15.748	0.15748	3.04	1.74356	52427.5	228.971	330
693	5	no flower strip	9	F	0.0115	0.0094	0.0021	21	18.2609	0.182609	3	1.73205	52427.5	228.971	330
694	5	no flower strip	9	F	0.0096	0.0084	0.0012	12	12.5	0.125	2.92	1.7088	52427.5	228.971	330
695	5	no flower strip	9	F	0.0104	0.0082	0.0022	22	21.1538	0.211538	2.96	1.72047	52427.5	228.971	330
696	5	no flower strip	9	F	0.0126	0.0097	0.0029	29	23.0159	0.230159	3	1.73205	52427.5	228.971	330
697	5	no flower strip	9	F	0.0111	0.0105	0.0006	6	5.40541	0.0540541	3.04	1.74356	52427.5	228.971	330
698	5	no flower strip	9	F	0.0128	0.0107	0.0021	21	16.4062	0.164062	3.12	1.76635	52427.5	228.971	330
699	6	flower strip	2	F	0.0141	0.0127	0.0014	14	9.92908	0.0992908	3.24	1.8	2.29459e+06	1514.79	10
700	6	flower strip	2	F	0.0147	0.0127	0.002	20	13.6054	0.136054	3.28	1.81108	2.29459e+06	1514.79	10
701	6	flower strip	2	F	0.0138	0.012	0.0018	18	13.0435	0.130435	3.16	1.77764	2.29459e+06	1514.79	10
702	6	flower strip	2	F	0.0149	0.0132	0.0017	17	11.4094	0.114094	3.24	1.8	2.29459e+06	1514.79	10
703	6	flower strip	2	F	0.0143	0.012	0.0023	23	16.0839	0.160839	3.16	1.77764	2.29459e+06	1514.79	10
704	6	flower strip	2	F	0.0141	0.0116	0.0025	25	17.7305	0.177305	3.2	1.78885	2.29459e+06	1514.79	10
705	6	flower strip	2	F	0.0173	0.0135	0.0038	38	21.9653	0.219653	3.24	1.8	2.29459e+06	1514.79	10
706	6	flower strip	2	F	0.0138	0.0111	0.0027	27	19.5652	0.195652	3.16	1.77764	2.29459e+06	1514.79	10
707	6	flower strip	3	F	0.0126	0.0109	0.0017	17	13.4921	0.134921	3.12	1.76635	1.40687e+06	1186.12	10
708	6	flower strip	3	F	0.0133	0.0109	0.0024	24	18.0451	0.180451	3.08	1.75499	1.40687e+06	1186.12	10
709	6	flower strip	3	F	0.0167	0.014	0.0027	27	16.1677	0.161677	3.32	1.82209	1.40687e+06	1186.12	10
710	6	flower strip	3	F	0.0149	0.0131	0.0018	18	12.0805	0.120805	3.28	1.81108	1.40687e+06	1186.12	10
711	6	flower strip	3	F	0.0145	0.0126	0.0019	19	13.1034	0.131034	3.2	1.78885	1.40687e+06	1186.12	10
712	6	flower strip	3	F	0.0165	0.0135	0.003	30	18.1818	0.181818	3.24	1.8	1.40687e+06	1186.12	10
713	6	flower strip	3	F	0.0161	0.0138	0.0023	23	14.2857	0.142857	3.24	1.8	1.40687e+06	1186.12	10
714	6	flower strip	3	F	0.014	0.0115	0.0025	25	17.8571	0.178571	3.12	1.76635	1.40687e+06	1186.12	10
715	6	flower strip	4	F	0.0142	0.0117	0.0025	25	17.6056	0.176056	3.12	1.76635	636225	797.637	10
716	6	flower strip	4	F	0.0128	0.0116	0.0012	12	9.375	0.09375	3.12	1.76635	636225	797.637	10
717	6	flower strip	4	F	0.0142	0.0118	0.0024	24	16.9014	0.169014	3.12	1.76635	636225	797.637	10
718	6	flower strip	4	F	0.0122	0.0105	0.0017	17	13.9344	0.139344	3.04	1.74356	636225	797.637	10
719	6	flower strip	4	F	0.0132	0.0107	0.0025	25	18.9394	0.189394	3.08	1.75499	636225	797.637	10
720	6	flower strip	4	F	0.0141	0.0117	0.0024	24	17.0213	0.170213	3.16	1.77764	636225	797.637	10
721	6	flower strip	4	F	0.0131	0.0108	0.0023	23	17.5573	0.175573	3.12	1.76635	636225	797.637	10
722	6	flower strip	4	F	0.016	0.0128	0.0032	32	20	0.2	3.2	1.78885	636225	797.637	10
723	6	flower strip	5	F	0.0141	0.0116	0.0025	25	17.7305	0.177305	3.2	1.78885	201826	449.251	10
724	6	flower strip	5	F	0.0125	0.0106	0.0019	19	15.2	0.152	3.04	1.74356	201826	449.251	10
725	6	flower strip	5	F	0.0103	0.0087	0.0016	16	15.534	0.15534	2.96	1.72047	201826	449.251	10
726	6	flower strip	5	F	0.0127	0.0107	0.002	20	15.748	0.15748	3.12	1.76635	201826	449.251	10
727	6	flower strip	5	F	0.0097	0.0073	0.0024	24	24.7423	0.247423	2.84	1.68523	201826	449.251	10
728	6	flower strip	5	F	0.0049	0.004	0.0009	9	18.3673	0.183673	2.44	1.56205	201826	449.251	10
729	6	flower strip	5	F	0.0119	0.0096	0.0023	23	19.3277	0.193277	3	1.73205	201826	449.251	10
730	6	flower strip	5	F	0.0124	0.0103	0.0021	21	16.9355	0.169355	3.08	1.75499	201826	449.251	10
731	6	flower strip	6	F	0.013	0.0107	0.0023	23	17.6923	0.176923	3.16	1.77764	107220	327.445	10
732	6	flower strip	6	F	0.0147	0.0119	0.0028	28	19.0476	0.190476	3.16	1.77764	107220	327.445	10
733	6	flower strip	6	F	0.0119	0.0095	0.0024	24	20.1681	0.201681	3	1.73205	107220	327.445	10
734	6	flower strip	6	F	0.0123	0.0107	0.0016	16	13.0081	0.130081	3.12	1.76635	107220	327.445	10
735	6	flower strip	6	F	0.0117	0.0096	0.0021	21	17.9487	0.179487	3	1.73205	107220	327.445	10
736	6	flower strip	6	F	0.0145	0.0127	0.0018	18	12.4138	0.124138	3.28	1.81108	107220	327.445	10
737	6	flower strip	6	F	0.0146	0.0126	0.002	20	13.6986	0.136986	3.24	1.8	107220	327.445	10
738	6	flower strip	6	F	0.0147	0.012	0.0027	27	18.3673	0.183673	3.2	1.78885	107220	327.445	10
739	6	flower strip	7	F	0.0117	0.0102	0.0015	15	12.8205	0.128205	3.04	1.74356	365022	604.17	10
740	6	flower strip	7	F	0.0111	0.0096	0.0015	15	13.5135	0.135135	2.96	1.72047	365022	604.17	10
741	6	flower strip	7	F	0.013	0.0112	0.0018	18	13.8462	0.138462	3.16	1.77764	365022	604.17	10
742	6	flower strip	7	F	0.0119	0.01	0.0019	19	15.9664	0.159664	2.88	1.69706	365022	604.17	10
743	6	flower strip	7	F	0.0114	0.0102	0.0012	12	10.5263	0.105263	3.12	1.76635	365022	604.17	10
744	6	flower strip	7	F	0.0118	0.0098	0.002	20	16.9492	0.169492	3	1.73205	365022	604.17	10
745	6	flower strip	7	F	0.0149	0.0129	0.002	20	13.4228	0.134228	3.32	1.82209	365022	604.17	10
746	6	flower strip	7	F	0.0107	0.009	0.0017	17	15.8879	0.158879	2.96	1.72047	365022	604.17	10
747	6	flower strip	8	F	0.0148	0.013	0.0018	18	12.1622	0.121622	3.2	1.78885	115104	339.27	10
748	6	flower strip	8	F	0.0146	0.012	0.0026	26	17.8082	0.178082	3.16	1.77764	115104	339.27	10
749	6	flower strip	8	F	0.011	0.0098	0.0012	12	10.9091	0.109091	3	1.73205	115104	339.27	10
750	6	flower strip	8	F	0.0126	0.0111	0.0015	15	11.9048	0.119048	3.12	1.76635	115104	339.27	10
751	6	flower strip	8	F	0.0103	0.0088	0.0015	15	14.5631	0.145631	2.92	1.7088	115104	339.27	10
752	6	flower strip	8	F	0.0113	0.0099	0.0014	14	12.3894	0.123894	3	1.73205	115104	339.27	10
753	6	flower strip	8	F	0.0132	0.0112	0.002	20	15.1515	0.151515	3.08	1.75499	115104	339.27	10
754	6	flower strip	8	F	0.0126	0.0098	0.0028	28	22.2222	0.222222	3.08	1.75499	115104	339.27	10
755	6	flower strip	9	F	0.0117	0.01	0.0017	17	14.5299	0.145299	3	1.73205	28381.8	168.469	10
756	6	flower strip	9	F	0.011	0.0099	0.0011	11	10	0.1	3	1.73205	28381.8	168.469	10
757	6	flower strip	9	F	0.0127	0.0112	0.0015	15	11.811	0.11811	3.2	1.78885	28381.8	168.469	10
758	6	flower strip	9	F	0.0129	0.011	0.0019	19	14.7287	0.147287	3.12	1.76635	28381.8	168.469	10
759	6	flower strip	9	F	0.0066	0.0057	0.0009	9	13.6364	0.136364	2.64	1.62481	28381.8	168.469	10
760	6	flower strip	9	F	0.0115	0.0102	0.0013	13	11.3043	0.113043	3.08	1.75499	28381.8	168.469	10
761	6	flower strip	9	F	0.0121	0.0096	0.0025	25	20.6612	0.206612	2.96	1.72047	28381.8	168.469	10
762	6	flower strip	9	F	0.0131	0.0115	0.0016	16	12.2137	0.122137	3.16	1.77764	28381.8	168.469	10

## Sheet: alfalfa seed yields
site	treatment	row	plant number	position	unique code	seed weight (g)	ln(seed weight)	plant weight (g)	sqrt(plant weight)
6	flower strip	1	3	R	P6N(1-3R)	16.65	2.81241	292.89	17.114
1	no flower strip	15	15	R	P1(15-15R)	44.3	3.79098	549.52	23.4418
3	no flower strip	20	3	L	P3N(20-3L)	4.9	1.58924	97	9.84886
2	flower strip	20	2	L	P2(20-2L)	63.49	4.15088	896.4	29.9399
1	no flower strip	20	2	L	P1(20-2L)	64.33	4.16403	471.07	21.7041
1	no flower strip	21	13	R	P1E(21-13R)	36.22	3.58961	576.94	24.0196
1	no flower strip	20	22	L	P1N(20-22L)	31.46	3.44872	460.94	21.4695
6	flower strip	1	10	R	P6N(1-10R)	16.47	2.80154	360.05	18.975
3	no flower strip	15	14	L	P3SW(15-14L)	1.52	0.41871	213.19	14.601
3	no flower strip	2	8	R	P3SE(2-8R)	2.59	0.951658	167.72	12.9507
3	no flower strip	15	5	L	P3W(15-5L)	6.05	1.80006	177.69	13.33
2	flower strip	20	22	L	P2N(20-22L)	107.24	4.67507	542.78	23.2976
4	flower strip	19	21	L	P4NW(19-21L)	27.39	3.31018	186.42	13.6536
2	flower strip	2	21	R	P2NE(2-21R)	47.74	3.86577	230.34	15.177
4	flower strip	14	24	L	P4NW(14-24L)	29.49	3.38405	169.79	13.0303
5	no flower strip	15	23	L	P5(15-23L)	5.04	1.61741	78.35	8.85155
2	flower strip	1	2	R	P2(1-2R)	39.87	3.68562	242.76	15.5808
3	no flower strip	20	26	L	P3N(20-26L)	2.57	0.943906	317.53	17.8194
6	flower strip	19	22	L	P6NW(19-22L)	9.31	2.23109	216.69	14.7204
6	flower strip	14	24	L	P6NW(14-24L)	11.11	2.40785	240.22	15.499
3	no flower strip	1	3	R	P3N(1-3R)	4.3	1.45862	79.89	8.93812
4	flower strip	1	3	R	P4N(1-3R)	18.68	2.92745	185.5	13.6198
5	no flower strip	1	10	R	P5N(1-10R)	6.54	1.87794	37.18	6.09754
5	no flower strip	20	2	L	P5(20-2L)	1.43	0.357674	17.72	4.20951
2	flower strip	15	23	L	P2(15-23L)	12.61	2.53449	174.64	13.2151
2	flower strip	15	5	R	P2(15-5R)	28.53	3.35096	223.64	14.9546
6	flower strip	1	20	R	P6(1-20R)	5.97	1.78675	161.82	12.7208
2	flower strip	20	13	R	P2(20-13R)	59.81	4.09117	450.1	21.2156
3	no flower strip	15	22	L	P3S(15-22L)	2.59	0.951658	186.75	13.6657
4	flower strip	1	9	R	P4(1-9R)	20.26	3.00865	192.97	13.8914
6	flower strip	15	15	R	P6(15-15R)	7.48	2.01223	290.13	17.0332
2	flower strip	15	16	R	P2N(15-16R)	54.29	3.99434	397.62	19.9404
5	no flower strip	20	13	R	P5(20-13R)	8.55	2.14593	84.3	9.1815
5	no flower strip	1	20	R	P5(1-20R)	20.22	3.00667	138.06	11.7499
1	no flower strip	1	20	R	P1(1-20R)	20.93	3.04118	558.54	23.6335
5	no flower strip	20	21	L	P5(20-21L)	10.45	2.3466	128.12	11.319
5	no flower strip	15	15	R	P5(15-15R)	14.34	2.66305	223.8	14.9599
4	flower strip	1	20	R	P4(1-20R)	27.52	3.31491	170.02	13.0392
1	no flower strip	15	23	R	P1E(15-23R)	8.82	2.17702	389.62	19.7388
3	no flower strip	20	13	R	P3(20-13R)	2.92	1.07158	180.01	13.4168
1	no flower strip	1	9	R	P1(1-9R)	19.44	2.96733	496.57	22.2839
5	no flower strip	15	5	R	P5(15-5R)	21.95	3.08877	168.03	12.9626
4	flower strip	15	5	R	P4(15-5R)	27.99	3.33185	189.15	13.7532
4	flower strip	16	14	R	P4SE(16-14R)	20.89	3.03927	262.78	16.2105
6	flower strip	20	13	L	P6W(20-13L)	5.94	1.78171	356.84	18.8902
4	flower strip	20	2	L	P4(20-2L)	41.97	3.73696	227.15	15.0715
4	flower strip	20	12	R	P4S(20-12R)	14.27	2.65816	197.7	14.0606
1	no flower strip	1	1	R	P1S(1-1R)	47.24	3.85524	669.59	25.8764
1	no flower strip	15	5	R	P1(15-5R)	10.95	2.39334	313.62	17.7093
6	flower strip	20	2	L	P6(20-2L)	5.96	1.78507	274.44	16.5662
5	no flower strip	1	2	R	P5(1-2R)	1.96	0.672944	35.05	5.9203
6	flower strip	15	5	R	P6(15-5R)	9.96	2.29858	279.53	16.7192
3	no flower strip	1	20	R	P3(1-20R)	7.31	1.98924	434.61	20.8473
2	flower strip	1	10	R	P2N(1-10R)	26.97	3.29473	357.09	18.8968
