# Supplementary material for: Seasonality and alternative floral resources affect reproductive success of the alfalfa leafcutting bee, Megachile rotundata
Source: PeerJ. 2024 Aug 16;12:e17902. doi: 10.7717/peerj.17902 (PMC11332388; doi:10.7717/peerj.17902)
Supplement: Supplemental Information 15 [file peerj-12-17902-s015.xlsx]

## Sheet: offspring production+survival
capsule no.	cage no.	nest no.	treatment	emerged female	emerged male	emerged gynandromorph	emerged adult (no gyn.)	emerged second gen.	destroyed cocoon	egg	larva	prepupa	pupa	unemerged male	unemerged female	unemerged adult	parasitoid	mold	chalkbrood	dead offspring (includes gynandromorphs and second gen. bees)	bee cells with offspring
1	24	1	WF only	0	0	0	0	0	0	0	0	1	0	0	0	0	0	0	0	1	1
2	24	1	WF only	0	0	0	0	0	0	0	0	1	0	0	0	0	0	0	0	1	1
3	24	1	WF only	0	0	0	0	0	0	0	0	0	1	0	0	0	0	0	0	1	1
4	24	2	WF only	0	0	0	0	0	0	0	1	0	0	0	0	0	0	0	0	1	1
5	24	2	WF only	0	0	0	0	0	0	0	1	0	0	0	0	0	0	0	0	1	1
6	24	2	WF only	0	0	0	0	0	0	0	0	0	1	0	0	0	0	0	0	1	1
7	24	2	WF only	0	0	0	0	0	0	0	0	0	0	1	0	1	0	0	0	1	1
8	24	2	WF only	0	0	0	0	0	0	0	0	0	1	0	0	0	0	0	0	1	1
9	24	2	WF only	0	0	0	0	0	0	0	0	0	1	0	0	0	0	0	0	1	1
10	24	2	WF only	0	0	0	0	0	0	0	0	0	0	1	0	1	0	0	0	1	1
11	24	3	WF only	0	0	0	0	0	0	0	0	1	0	0	0	0	0	0	0	1	1
12	24	4	WF only	1	0	0	1	0	0	0	0	0	0	0	0	0	0	0	0	0	1
13	24	4	WF only	0	0	0	0	0	0	0	0	0	0	0	0	0	0	0	0	0	0
14	24	5	WF only	0	1	0	1	0	0	0	0	0	0	0	0	0	0	0	0	0	1
15	24	5	WF only	0	0	0	0	0	0	0	0	0	0	0	0	0	0	0	0	0	0
16	24	6	WF only	1	0	0	1	0	0	0	0	0	0	0	0	0	0	0	0	0	1
17	24	6	WF only	0	1	0	1	0	0	0	0	0	0	0	0	0	0	0	0	0	1
18	24	6	WF only	0	0	0	0	0	0	1	0	0	0	0	0	0	0	0	0	1	1
19	24	6	WF only	0	0	0	0	0	0	0	1	0	0	0	0	0	0	0	0	1	1
20	24	6	WF only	0	0	0	0	0	0	0	0	0	0	0	0	0	0	0	0	0	0
21	24	6	WF only	0	0	0	0	0	0	0	0	0	0	0	0	0	0	0	0	0	0
22	24	6	WF only	0	0	0	0	0	0	0	0	0	0	0	0	0	0	0	0	0	0
23	24	7	WF only	0	0	0	0	0	0	0	0	0	0	0	0	0	0	0	0	0	0
24	24	8	WF only	0	0	0	0	0	0	0	0	0	0	0	0	0	0	0	0	0	0
25	24	9	WF only	0	0	0	0	0	0	0	0	0	0	0	0	0	0	0	0	0	0
26	24	10	WF only	0	0	0	0	0	0	0	0	0	0	0	0	0	0	0	0	0	0
27	24	11	WF only	0	0	0	0	0	0	0	0	0	0	0	0	0	0	0	0	0	0
28	24	11	WF only	0	1	0	1	0	0	0	0	0	0	0	0	0	0	0	0	0	1
29	24	11	WF only	0	0	0	0	0	0	0	0	0	0	0	0	0	0	0	0	0	0
30	24	11	WF only	0	0	0	0	0	0	0	0	0	0	0	0	0	0	0	0	0	0
31	24	12	WF only	0	0	0	0	0	0	0	0	0	1	0	0	0	0	0	0	1	1
32	24	12	WF only	0	1	0	1	0	0	0	0	0	0	0	0	0	0	0	0	0	1
33	24	12	WF only	0	1	0	1	0	0	0	0	0	0	0	0	0	0	0	0	0	1
34	24	12	WF only	0	1	0	1	0	0	0	0	0	0	0	0	0	0	0	0	0	1
35	24	12	WF only	0	1	0	1	0	0	0	0	0	0	0	0	0	0	0	0	0	1
36	24	12	WF only	0	1	0	1	0	0	0	0	0	0	0	0	0	0	0	0	0	1
37	24	12	WF only	0	0	0	0	0	0	0	0	0	1	0	0	0	0	0	0	1	1
38	24	12	WF only	0	1	0	1	0	0	0	0	0	0	0	0	0	0	0	0	0	1
39	24	12	WF only	0	0	0	0	0	0	0	1	0	0	0	0	0	0	0	0	1	1
40	24	13	WF only	0	0	0	0	0	0	0	0	1	0	0	0	0	0	0	0	1	1
41	24	13	WF only	0	1	0	1	0	0	0	0	0	0	0	0	0	0	0	0	0	1
42	24	13	WF only	0	0	0	0	0	0	0	0	0	0	0	0	0	0	0	0	0	0
43	23	1	A only	0	0	0	0	0	0	0	0	0	0	0	0	0	0	0	0	0	0
44	23	1	A only	0	1	0	1	0	0	0	0	0	0	0	0	0	0	0	0	0	1
45	23	1	A only	0	0	0	0	0	0	0	0	1	0	0	0	0	0	0	0	1	1
46	23	1	A only	0	0	0	0	0	0	0	0	0	0	0	0	0	0	0	0	0	0
47	23	2	A only	0	0	0	0	0	0	0	0	0	0	0	0	0	0	0	0	0	0
48	23	3	A only	0	0	0	0	0	0	0	0	0	0	0	0	0	0	0	0	0	0
49	23	4	A only	0	1	0	1	0	0	0	0	0	0	0	0	0	0	0	0	0	1
50	23	4	A only	0	1	0	1	0	0	0	0	0	0	0	0	0	0	0	0	0	1
51	23	4	A only	0	1	0	1	0	0	0	0	0	0	0	0	0	0	0	0	0	1
52	23	4	A only	0	1	0	1	0	0	0	0	0	0	0	0	0	0	0	0	0	1
53	23	4	A only	0	1	0	1	0	0	0	0	0	0	0	0	0	0	0	0	0	1
54	23	4	A only	0	1	0	1	0	0	0	0	0	0	0	0	0	0	0	0	0	1
55	23	4	A only	0	1	0	1	0	0	0	0	0	0	0	0	0	0	0	0	0	1
56	23	4	A only	0	1	0	1	0	0	0	0	0	0	0	0	0	0	0	0	0	1
57	23	4	A only	0	1	0	1	0	0	0	0	0	0	0	0	0	0	0	0	0	1
58	23	4	A only	0	1	0	1	0	0	0	0	0	0	0	0	0	0	0	0	0	1
59	23	5	A only	0	0	0	0	0	0	0	1	0	0	0	0	0	0	0	0	1	1
60	23	6	A only	0	0	0	0	0	0	0	0	0	0	0	0	0	0	0	1	1	1
61	23	6	A only	0	0	0	0	0	0	0	0	0	0	0	0	0	0	0	0	0	0
62	23	7	A only	0	0	0	0	0	0	0	1	0	0	0	0	0	0	0	0	1	1
63	23	7	A only	0	1	0	1	0	0	0	0	0	0	0	0	0	0	0	0	0	1
64	23	7	A only	0	1	0	1	0	0	0	0	0	0	0	0	0	0	0	0	0	1
65	23	7	A only	0	1	0	1	0	0	0	0	0	0	0	0	0	0	0	0	0	1
66	23	7	A only	0	1	0	1	0	0	0	0	0	0	0	0	0	0	0	0	0	1
67	23	7	A only	0	1	0	1	0	0	0	0	0	0	0	0	0	0	0	0	0	1
68	23	7	A only	0	1	0	1	0	0	0	0	0	0	0	0	0	0	0	0	0	1
69	23	7	A only	0	1	0	1	0	0	0	0	0	0	0	0	0	0	0	0	0	1
70	23	7	A only	0	1	0	1	0	0	0	0	0	0	0	0	0	0	0	0	0	1
71	23	7	A only	0	1	0	1	0	0	0	0	0	0	0	0	0	0	0	0	0	1
72	23	7	A only	0	1	0	1	0	0	0	0	0	0	0	0	0	0	0	0	0	1
73	23	7	A only	0	1	0	1	0	0	0	0	0	0	0	0	0	0	0	0	0	1
74	23	8	A only	0	0	0	0	0	0	0	1	0	0	0	0	0	0	0	0	1	1
75	23	8	A only	0	0	0	0	0	0	0	1	0	0	0	0	0	0	0	0	1	1
76	23	8	A only	1	0	0	1	0	0	0	0	0	0	0	0	0	0	0	0	0	1
77	23	8	A only	0	1	0	1	0	0	0	0	0	0	0	0	0	0	0	0	0	1
78	23	8	A only	0	1	0	1	0	0	0	0	0	0	0	0	0	0	0	0	0	1
79	23	8	A only	0	1	0	1	0	0	0	0	0	0	0	0	0	0	0	0	0	1
80	23	8	A only	0	0	0	0	0	0	0	0	1	0	0	0	0	0	0	0	1	1
81	23	8	A only	0	1	0	1	0	0	0	0	0	0	0	0	0	0	0	0	0	1
82	23	8	A only	0	1	0	1	0	0	0	0	0	0	0	0	0	0	0	0	0	1
83	23	8	A only	0	1	0	1	0	0	0	0	0	0	0	0	0	0	0	0	0	1
84	23	9	A only	0	0	0	0	0	0	0	0	0	0	0	0	0	0	0	0	0	0
85	23	9	A only	0	0	0	0	0	0	0	0	1	0	0	0	0	0	0	0	1	1
86	23	9	A only	0	1	0	1	0	0	0	0	0	0	0	0	0	0	0	0	0	1
87	23	9	A only	0	1	0	1	0	0	0	0	0	0	0	0	0	0	0	0	0	1
88	23	9	A only	0	1	0	1	0	0	0	0	0	0	0	0	0	0	0	0	0	1
89	23	10	A only	1	0	0	1	0	0	0	0	0	0	0	0	0	0	0	0	0	1
90	23	10	A only	0	0	0	0	0	0	0	0	0	1	0	0	0	0	0	0	1	1
91	23	10	A only	1	0	0	1	0	0	0	0	0	0	0	0	0	0	0	0	0	1
92	23	10	A only	0	0	0	0	0	0	0	1	0	0	0	0	0	0	0	0	1	1
93	23	10	A only	0	1	0	1	0	0	0	0	0	0	0	0	0	0	0	0	0	1
94	23	10	A only	1	0	0	1	0	0	0	0	0	0	0	0	0	0	0	0	0	1
95	23	10	A only	0	1	0	1	0	0	0	0	0	0	0	0	0	0	0	0	0	1
96	23	10	A only	0	1	0	1	0	0	0	0	0	0	0	0	0	0	0	0	0	1
97	23	10	A only	0	1	0	1	0	0	0	0	0	0	0	0	0	0	0	0	0	1
98	23	10	A only	0	1	0	1	0	0	0	0	0	0	0	0	0	0	0	0	0	1
99	23	10	A only	0	1	0	1	0	0	0	0	0	0	0	0	0	0	0	0	0	1
100	23	10	A only	0	0	0	0	0	0	0	1	0	0	0	0	0	0	0	0	1	1
101	23	11	A only	0	1	0	1	0	0	0	0	0	0	0	0	0	0	0	0	0	1
102	23	11	A only	0	1	0	1	0	0	0	0	0	0	0	0	0	0	0	0	0	1
103	23	12	A only	0	0	0	0	0	0	0	0	0	0	0	0	0	0	0	0	0	0
104	23	13	A only	0	0	0	0	0	0	0	0	0	0	0	0	0	0	0	0	0	0
105	23	14	A only	0	0	0	0	0	0	0	0	0	0	0	0	0	0	0	0	0	0
106	23	15	A only	0	0	0	0	0	0	0	0	0	0	0	0	0	0	0	0	0	0
107	23	16	A only	0	0	0	0	0	0	0	0	0	0	0	0	0	0	0	0	0	0
108	23	17	A only	0	0	0	0	0	0	0	0	0	0	0	0	0	0	0	0	0	0
109	23	18	A only	0	0	0	0	0	0	0	0	0	0	0	1	1	0	0	0	1	1
110	23	18	A only	0	0	0	0	0	0	0	0	0	0	0	0	0	0	0	0	0	0
111	23	18	A only	0	0	0	0	0	0	0	0	0	0	0	0	0	0	0	0	0	0
112	23	18	A only	0	0	0	0	0	0	0	0	0	0	0	0	0	0	0	0	0	0
113	23	19	A only	0	0	0	0	0	0	0	0	0	0	0	0	0	0	0	0	0	0
114	23	19	A only	1	0	0	1	0	0	0	0	0	0	0	0	0	0	0	0	0	1
115	23	19	A only	0	0	0	0	0	0	0	0	0	0	0	0	0	0	0	0	0	0
116	23	19	A only	0	0	0	0	0	0	0	0	0	0	1	0	1	0	0	0	1	1
117	23	19	A only	0	1	0	1	0	0	0	0	0	0	0	0	0	0	0	0	0	1
118	23	19	A only	0	1	0	1	0	0	0	0	0	0	0	0	0	0	0	0	0	1
119	23	19	A only	0	0	0	0	0	0	0	0	0	0	0	0	0	0	0	0	0	0
120	23	19	A only	0	0	0	0	0	0	0	0	0	0	0	0	0	0	0	0	0	0
121	23	20	A only	0	0	0	0	0	0	0	1	0	0	0	0	0	0	0	0	1	1
122	23	20	A only	0	0	0	0	0	0	0	0	0	0	0	0	0	0	0	0	0	0
123	23	20	A only	0	0	0	0	0	0	0	0	0	0	1	0	1	0	0	0	1	1
124	23	20	A only	0	0	0	0	0	0	0	0	1	0	0	0	0	0	0	0	1	1
125	23	20	A only	0	0	0	0	0	0	0	1	0	0	0	0	0	0	0	0	1	1
126	23	20	A only	0	0	0	0	0	0	0	0	0	0	0	0	0	0	0	0	0	0
127	23	21	A only	0	0	0	0	0	0	0	0	0	0	0	0	0	0	0	0	0	0
128	23	22	A only	0	0	0	0	0	0	0	0	0	0	0	0	0	0	0	0	0	0
129	23	22	A only	0	0	0	0	0	0	0	0	0	0	0	0	0	0	0	0	0	0
130	23	23	A only	0	0	0	0	0	0	0	0	0	0	0	0	0	0	0	0	0	0
131	23	24	A only	0	0	0	0	0	0	0	0	0	0	0	0	0	0	0	0	0	0
132	23	25	A only	0	0	0	0	0	0	0	0	0	0	0	0	0	0	0	0	0	0
133	22	1	A + WF	1	0	0	1	0	0	0	0	0	0	0	0	0	0	0	0	0	1
134	22	1	A + WF	0	0	0	0	1	0	0	0	0	0	0	0	0	0	0	0	1	1
135	22	1	A + WF	0	1	0	1	0	0	0	0	0	0	0	0	0	0	0	0	0	1
136	22	1	A + WF	0	0	0	0	0	0	0	0	1	0	0	0	0	0	0	0	1	1
137	22	1	A + WF	0	1	0	1	0	0	0	0	0	0	0	0	0	0	0	0	0	1
138	22	1	A + WF	0	1	0	1	0	0	0	0	0	0	0	0	0	0	0	0	0	1
139	22	1	A + WF	0	1	0	1	0	0	0	0	0	0	0	0	0	0	0	0	0	1
140	22	1	A + WF	0	0	0	0	0	0	0	1	0	0	0	0	0	0	0	0	1	1
141	22	1	A + WF	0	0	0	0	0	0	0	0	1	0	0	0	0	0	0	0	1	1
142	22	1	A + WF	0	0	0	0	0	0	0	0	1	0	0	0	0	0	0	0	1	1
143	22	1	A + WF	0	0	0	0	0	0	0	0	1	0	0	0	0	0	0	0	1	1
144	22	2	A + WF	0	0	0	0	0	0	0	0	0	0	0	0	0	0	0	0	0	0
145	22	2	A + WF	0	1	0	1	0	0	0	0	0	0	0	0	0	0	0	0	0	1
146	22	2	A + WF	0	0	0	0	0	0	0	0	0	0	0	0	0	0	0	0	0	0
147	22	3	A + WF	0	0	0	0	0	0	0	0	0	0	0	0	0	0	0	0	0	0
148	22	4	A + WF	1	0	0	1	0	0	0	0	0	0	0	0	0	0	0	0	0	1
149	22	4	A + WF	1	0	0	1	0	0	0	0	0	0	0	0	0	0	0	0	0	1
150	22	4	A + WF	1	0	0	1	0	0	0	0	0	0	0	0	0	0	0	0	0	1
151	22	4	A + WF	0	1	0	1	0	0	0	0	0	0	0	0	0	0	0	0	0	1
152	22	4	A + WF	0	1	0	1	0	0	0	0	0	0	0	0	0	0	0	0	0	1
153	22	4	A + WF	0	1	0	1	0	0	0	0	0	0	0	0	0	0	0	0	0	1
154	22	4	A + WF	0	1	0	1	0	0	0	0	0	0	0	0	0	0	0	0	0	1
155	22	4	A + WF	0	0	0	0	0	0	0	1	0	0	0	0	0	0	0	0	1	1
156	22	4	A + WF	0	0	0	0	0	0	0	1	0	0	0	0	0	0	0	0	1	1
157	22	5	A + WF	1	0	0	1	0	0	0	0	0	0	0	0	0	0	0	0	0	1
158	22	5	A + WF	1	0	0	1	0	0	0	0	0	0	0	0	0	0	0	0	0	1
159	22	5	A + WF	1	0	0	1	0	0	0	0	0	0	0	0	0	0	0	0	0	1
160	22	5	A + WF	0	1	0	1	0	0	0	0	0	0	0	0	0	0	0	0	0	1
161	22	5	A + WF	0	1	0	1	0	0	0	0	0	0	0	0	0	0	0	0	0	1
162	22	5	A + WF	0	1	0	1	0	0	0	0	0	0	0	0	0	0	0	0	0	1
163	22	5	A + WF	0	1	0	1	0	0	0	0	0	0	0	0	0	0	0	0	0	1
164	22	5	A + WF	0	1	0	1	0	0	0	0	0	0	0	0	0	0	0	0	0	1
165	22	5	A + WF	0	1	0	1	0	0	0	0	0	0	0	0	0	0	0	0	0	1
166	22	6	A + WF	0	0	0	0	0	0	0	0	0	0	0	0	0	0	0	0	0	0
167	22	7	A + WF	1	0	0	1	0	0	0	0	0	0	0	0	0	0	0	0	0	1
168	22	7	A + WF	1	0	0	1	0	0	0	0	0	0	0	0	0	0	0	0	0	1
169	22	7	A + WF	1	0	0	1	0	0	0	0	0	0	0	0	0	0	0	0	0	1
170	22	7	A + WF	1	0	0	1	0	0	0	0	0	0	0	0	0	0	0	0	0	1
171	22	7	A + WF	0	1	0	1	0	0	0	0	0	0	0	0	0	0	0	0	0	1
172	22	7	A + WF	0	1	0	1	0	0	0	0	0	0	0	0	0	0	0	0	0	1
173	22	7	A + WF	0	0	0	0	0	0	0	1	0	0	0	0	0	0	0	0	1	1
174	22	7	A + WF	0	0	0	0	0	0	0	1	0	0	0	0	0	0	0	0	1	1
175	22	7	A + WF	0	0	0	0	0	0	0	1	0	0	0	0	0	0	0	0	1	1
176	22	8	A + WF	1	0	0	1	0	0	0	0	0	0	0	0	0	0	0	0	0	1
177	22	8	A + WF	1	0	0	1	0	0	0	0	0	0	0	0	0	0	0	0	0	1
178	22	8	A + WF	1	0	0	1	0	0	0	0	0	0	0	0	0	0	0	0	0	1
179	22	8	A + WF	0	1	0	1	0	0	0	0	0	0	0	0	0	0	0	0	0	1
180	22	8	A + WF	0	1	0	1	0	0	0	0	0	0	0	0	0	0	0	0	0	1
181	22	8	A + WF	0	1	0	1	0	0	0	0	0	0	0	0	0	0	0	0	0	1
182	22	8	A + WF	0	0	0	0	0	0	0	0	0	1	0	0	0	0	0	0	1	1
183	22	8	A + WF	0	1	0	1	0	0	0	0	0	0	0	0	0	0	0	0	0	1
184	22	8	A + WF	0	0	0	0	0	0	0	0	1	0	0	0	0	0	0	0	1	1
185	22	8	A + WF	0	0	0	0	0	0	0	0	0	1	0	0	0	0	0	0	1	1
186	22	8	A + WF	0	0	0	0	0	0	0	0	0	1	0	0	0	0	0	0	1	1
187	22	9	A + WF	0	0	0	0	0	0	0	0	0	0	0	0	0	0	0	0	0	0
188	22	10	A + WF	0	0	0	0	0	0	0	0	0	0	0	0	0	0	0	0	0	0
189	22	10	A + WF	0	0	0	0	0	0	0	0	0	0	0	0	0	0	0	0	0	0
190	22	10	A + WF	0	0	0	0	0	0	0	0	0	0	0	0	0	0	0	0	0	0
191	22	10	A + WF	0	1	0	1	0	0	0	0	0	0	0	0	0	0	0	0	0	1
192	22	10	A + WF	0	1	0	1	0	0	0	0	0	0	0	0	0	0	0	0	0	1
193	22	10	A + WF	0	1	0	1	0	0	0	0	0	0	0	0	0	0	0	0	0	1
194	22	11	A + WF	1	0	0	1	0	0	0	0	0	0	0	0	0	0	0	0	0	1
195	22	11	A + WF	1	0	0	1	0	0	0	0	0	0	0	0	0	0	0	0	0	1
196	22	11	A + WF	0	1	0	1	0	0	0	0	0	0	0	0	0	0	0	0	0	1
197	22	11	A + WF	0	1	0	1	0	0	0	0	0	0	0	0	0	0	0	0	0	1
198	22	11	A + WF	0	1	0	1	0	0	0	0	0	0	0	0	0	0	0	0	0	1
199	22	11	A + WF	0	1	0	1	0	0	0	0	0	0	0	0	0	0	0	0	0	1
200	22	11	A + WF	0	1	0	1	0	0	0	0	0	0	0	0	0	0	0	0	0	1
201	22	11	A + WF	0	1	0	1	0	0	0	0	0	0	0	0	0	0	0	0	0	1
202	22	11	A + WF	0	1	0	1	0	0	0	0	0	0	0	0	0	0	0	0	0	1
203	22	11	A + WF	0	1	0	1	0	0	0	0	0	0	0	0	0	0	0	0	0	1
204	22	11	A + WF	0	0	0	0	0	0	0	1	0	0	0	0	0	0	0	0	1	1
205	22	12	A + WF	0	0	0	0	0	0	0	0	0	0	0	1	1	0	0	0	1	1
206	22	12	A + WF	0	1	0	1	0	0	0	0	0	0	0	0	0	0	0	0	0	1
207	22	12	A + WF	0	1	0	1	0	0	0	0	0	0	0	0	0	0	0	0	0	1
208	22	12	A + WF	0	1	0	1	0	0	0	0	0	0	0	0	0	0	0	0	0	1
209	22	12	A + WF	0	1	0	1	0	0	0	0	0	0	0	0	0	0	0	0	0	1
210	22	12	A + WF	0	1	0	1	0	0	0	0	0	0	0	0	0	0	0	0	0	1
211	22	12	A + WF	0	1	0	1	0	0	0	0	0	0	0	0	0	0	0	0	0	1
212	22	12	A + WF	1	0	0	1	0	0	0	0	0	0	0	0	0	0	0	0	0	1
213	22	12	A + WF	0	1	0	1	0	0	0	0	0	0	0	0	0	0	0	0	0	1
214	22	13	A + WF	0	0	0	0	0	0	0	0	0	0	0	0	0	0	0	0	0	0
215	22	14	A + WF	1	0	0	1	0	0	0	0	0	0	0	0	0	0	0	0	0	1
216	22	14	A + WF	0	0	0	0	0	0	0	0	0	1	0	0	0	0	0	0	1	1
217	22	14	A + WF	0	0	0	0	0	0	0	0	0	1	0	0	0	0	0	0	1	1
218	22	14	A + WF	0	0	0	0	0	0	0	0	0	0	0	0	0	0	0	0	0	0
219	22	15	A + WF	1	0	0	1	0	0	0	0	0	0	0	0	0	0	0	0	0	1
220	22	15	A + WF	1	0	0	1	0	0	0	0	0	0	0	0	0	0	0	0	0	1
221	22	15	A + WF	0	0	0	0	0	0	0	0	1	0	0	0	0	0	0	0	1	1
222	22	15	A + WF	0	1	0	1	0	0	0	0	0	0	0	0	0	0	0	0	0	1
223	22	15	A + WF	0	1	0	1	0	0	0	0	0	0	0	0	0	0	0	0	0	1
224	22	16	A + WF	1	0	0	1	0	0	0	0	0	0	0	0	0	0	0	0	0	1
225	22	16	A + WF	0	1	0	1	0	0	0	0	0	0	0	0	0	0	0	0	0	1
226	22	16	A + WF	0	1	0	1	0	0	0	0	0	0	0	0	0	0	0	0	0	1
227	22	16	A + WF	0	1	0	1	0	0	0	0	0	0	0	0	0	0	0	0	0	1
228	22	16	A + WF	0	1	0	1	0	0	0	0	0	0	0	0	0	0	0	0	0	1
229	22	16	A + WF	0	0	0	0	0	0	0	0	1	0	0	0	0	0	0	0	1	1
230	22	16	A + WF	0	1	0	1	0	0	0	0	0	0	0	0	0	0	0	0	0	1
231	22	16	A + WF	0	1	0	1	0	0	0	0	0	0	0	0	0	0	0	0	0	1
232	22	16	A + WF	0	1	0	1	0	0	0	0	0	0	0	0	0	0	0	0	0	1
233	22	16	A + WF	0	1	0	1	0	0	0	0	0	0	0	0	0	0	0	0	0	1
234	22	17	A + WF	1	0	0	1	0	0	0	0	0	0	0	0	0	0	0	0	0	1
235	22	17	A + WF	1	0	0	1	0	0	0	0	0	0	0	0	0	0	0	0	0	1
236	22	17	A + WF	0	1	0	1	0	0	0	0	0	0	0	0	0	0	0	0	0	1
237	22	17	A + WF	0	1	0	1	0	0	0	0	0	0	0	0	0	0	0	0	0	1
238	22	17	A + WF	0	1	0	1	0	0	0	0	0	0	0	0	0	0	0	0	0	1
239	22	17	A + WF	0	0	0	0	0	0	0	0	0	0	0	0	0	0	0	0	0	0
240	22	18	A + WF	0	0	0	0	0	0	0	0	0	0	0	0	0	0	0	0	0	0
241	22	19	A + WF	0	0	0	0	0	0	0	0	0	1	0	0	0	0	0	0	1	1
242	22	19	A + WF	0	1	0	1	0	0	0	0	0	0	0	0	0	0	0	0	0	1
243	22	19	A + WF	0	0	0	0	0	0	0	0	1	0	0	0	0	0	0	0	1	1
244	22	19	A + WF	0	1	0	1	0	0	0	0	0	0	0	0	0	0	0	0	0	1
245	22	19	A + WF	0	0	0	0	0	0	0	0	0	0	1	0	1	0	0	0	1	1
246	22	19	A + WF	0	1	0	1	0	0	0	0	0	0	0	0	0	0	0	0	0	1
247	22	19	A + WF	0	1	0	1	0	0	0	0	0	0	0	0	0	0	0	0	0	1
248	22	19	A + WF	0	1	0	1	0	0	0	0	0	0	0	0	0	0	0	0	0	1
249	22	19	A + WF	0	1	0	1	0	0	0	0	0	0	0	0	0	0	0	0	0	1
250	22	19	A + WF	0	0	0	0	0	0	0	1	0	0	0	0	0	0	0	0	1	1
251	22	20	A + WF	0	0	0	0	0	0	0	0	0	1	0	0	0	0	0	0	1	1
252	22	20	A + WF	1	0	0	1	0	0	0	0	0	0	0	0	0	0	0	0	0	1
253	22	20	A + WF	0	0	0	0	0	0	0	0	0	1	0	0	0	0	0	0	1	1
254	22	20	A + WF	0	1	0	1	0	0	0	0	0	0	0	0	0	0	0	0	0	1
255	22	20	A + WF	0	1	0	1	0	0	0	0	0	0	0	0	0	0	0	0	0	1
256	22	20	A + WF	0	0	0	0	0	0	0	1	0	0	0	0	0	0	0	0	1	1
257	22	20	A + WF	0	1	0	1	0	0	0	0	0	0	0	0	0	0	0	0	0	1
258	22	20	A + WF	0	0	0	0	0	0	0	0	1	0	0	0	0	0	0	0	1	1
259	22	20	A + WF	0	1	0	1	0	0	0	0	0	0	0	0	0	0	0	0	0	1
260	22	21	A + WF	0	0	0	0	0	0	0	0	0	0	0	0	0	0	0	0	0	0
261	22	22	A + WF	0	1	0	1	0	0	0	0	0	0	0	0	0	0	0	0	0	1
262	22	23	A + WF	1	0	0	1	0	0	0	0	0	0	0	0	0	0	0	0	0	1
263	22	23	A + WF	0	1	0	1	0	0	0	0	0	0	0	0	0	0	0	0	0	1
264	22	23	A + WF	0	1	0	1	0	0	0	0	0	0	0	0	0	0	0	0	0	1
265	22	23	A + WF	0	1	0	1	0	0	0	0	0	0	0	0	0	0	0	0	0	1
266	22	23	A + WF	0	1	0	1	0	0	0	0	0	0	0	0	0	0	0	0	0	1
267	22	23	A + WF	0	1	0	1	0	0	0	0	0	0	0	0	0	0	0	0	0	1
268	22	23	A + WF	0	1	0	1	0	0	0	0	0	0	0	0	0	0	0	0	0	1
269	22	23	A + WF	0	1	0	1	0	0	0	0	0	0	0	0	0	0	0	0	0	1
270	22	23	A + WF	0	0	0	0	0	0	0	1	0	0	0	0	0	0	0	0	1	1
271	22	23	A + WF	0	0	0	0	0	0	0	0	0	0	0	0	0	0	0	0	0	0
272	22	24	A + WF	0	0	0	0	0	0	0	1	0	0	0	0	0	0	0	0	1	1
273	22	24	A + WF	0	0	0	0	0	0	0	0	0	0	1	0	1	0	0	0	1	1
274	22	24	A + WF	0	1	0	1	0	0	0	0	0	0	0	0	0	0	0	0	0	1
275	22	24	A + WF	0	1	0	1	0	0	0	0	0	0	0	0	0	0	0	0	0	1
276	22	24	A + WF	0	1	0	1	0	0	0	0	0	0	0	0	0	0	0	0	0	1
277	22	24	A + WF	0	1	0	1	0	0	0	0	0	0	0	0	0	0	0	0	0	1
278	22	24	A + WF	0	1	0	1	0	0	0	0	0	0	0	0	0	0	0	0	0	1
279	22	24	A + WF	0	1	0	1	0	0	0	0	0	0	0	0	0	0	0	0	0	1
280	22	24	A + WF	0	1	0	1	0	0	0	0	0	0	0	0	0	0	0	0	0	1
281	22	24	A + WF	0	1	0	1	0	0	0	0	0	0	0	0	0	0	0	0	0	1
282	22	24	A + WF	0	1	0	1	0	0	0	0	0	0	0	0	0	0	0	0	0	1
283	22	25	A + WF	0	0	0	0	0	0	0	0	0	0	0	0	0	0	0	0	0	0
284	22	26	A + WF	0	0	0	0	0	0	0	0	0	0	0	0	0	0	0	0	0	0
285	22	27	A + WF	0	0	0	0	0	0	0	1	0	0	0	0	0	0	0	0	1	1
286	22	27	A + WF	0	0	0	0	0	0	0	0	0	0	1	0	1	0	0	0	1	1
287	22	27	A + WF	0	0	0	0	0	0	0	0	0	0	0	0	0	0	0	0	0	0
288	22	28	A + WF	0	1	0	1	0	0	0	0	0	0	0	0	0	0	0	0	0	1
289	22	28	A + WF	0	1	0	1	0	0	0	0	0	0	0	0	0	0	0	0	0	1
290	22	28	A + WF	0	1	0	1	0	0	0	0	0	0	0	0	0	0	0	0	0	1
291	22	28	A + WF	0	0	0	0	0	0	0	0	1	0	0	0	0	0	0	0	1	1
292	22	28	A + WF	0	1	0	1	0	0	0	0	0	0	0	0	0	0	0	0	0	1
293	22	28	A + WF	0	1	0	1	0	0	0	0	0	0	0	0	0	0	0	0	0	1
294	22	28	A + WF	0	1	0	1	0	0	0	0	0	0	0	0	0	0	0	0	0	1
295	22	28	A + WF	0	1	0	1	0	0	0	0	0	0	0	0	0	0	0	0	0	1
296	22	28	A + WF	0	1	0	1	0	0	0	0	0	0	0	0	0	0	0	0	0	1
297	22	28	A + WF	0	0	0	0	0	0	0	1	0	0	0	0	0	0	0	0	1	1
298	22	29	A + WF	0	1	0	1	0	0	0	0	0	0	0	0	0	0	0	0	0	1
299	22	29	A + WF	0	1	0	1	0	0	0	0	0	0	0	0	0	0	0	0	0	1
300	22	29	A + WF	0	1	0	1	0	0	0	0	0	0	0	0	0	0	0	0	0	1
301	22	29	A + WF	0	1	0	1	0	0	0	0	0	0	0	0	0	0	0	0	0	1
302	22	29	A + WF	0	0	0	0	0	0	0	1	0	0	0	0	0	0	0	0	1	1
303	22	29	A + WF	0	1	0	1	0	0	0	0	0	0	0	0	0	0	0	0	0	1
304	22	29	A + WF	0	0	0	0	0	0	0	0	0	0	0	0	0	0	0	0	0	0
305	22	30	A + WF	1	0	0	1	0	0	0	0	0	0	0	0	0	0	0	0	0	1
306	22	30	A + WF	0	0	0	0	0	0	0	0	0	0	0	0	0	0	0	0	0	0
307	22	30	A + WF	0	1	0	1	0	0	0	0	0	0	0	0	0	0	0	0	0	1
308	22	31	A + WF	0	0	0	0	0	0	0	0	0	0	0	0	0	0	0	0	0	0
309	22	32	A + WF	0	0	0	0	0	0	0	0	0	0	0	0	0	0	0	0	0	0
310	22	32	A + WF	0	0	0	0	0	0	0	0	0	0	0	0	0	0	0	0	0	0
311	22	33	A + WF	0	1	0	1	0	0	0	0	0	0	0	0	0	0	0	0	0	1
312	22	33	A + WF	0	0	0	0	0	0	0	0	0	0	0	0	0	0	0	0	0	0
313	21	1	A only	0	0	0	0	0	0	0	0	0	0	0	0	0	0	0	0	0	0
314	21	2	A only	1	0	0	1	0	0	0	0	0	0	0	0	0	0	0	0	0	1
315	21	2	A only	0	1	0	1	0	0	0	0	0	0	0	0	0	0	0	0	0	1
316	21	2	A only	0	1	0	1	0	0	0	0	0	0	0	0	0	0	0	0	0	1
317	21	2	A only	0	1	0	1	0	0	0	0	0	0	0	0	0	0	0	0	0	1
318	21	2	A only	0	1	0	1	0	0	0	0	0	0	0	0	0	0	0	0	0	1
319	21	2	A only	0	1	0	1	0	0	0	0	0	0	0	0	0	0	0	0	0	1
320	21	2	A only	0	1	0	1	0	0	0	0	0	0	0	0	0	0	0	0	0	1
321	21	2	A only	0	0	0	0	0	0	0	0	0	0	0	0	0	0	0	0	0	0
322	21	3	A only	0	0	0	0	0	0	0	1	0	0	0	0	0	0	0	0	1	1
323	21	3	A only	0	0	0	0	0	0	0	0	1	0	0	0	0	0	0	0	1	1
324	21	3	A only	0	1	0	1	0	0	0	0	0	0	0	0	0	0	0	0	0	1
325	21	3	A only	0	1	0	1	0	0	0	0	0	0	0	0	0	0	0	0	0	1
326	21	3	A only	0	1	0	1	0	0	0	0	0	0	0	0	0	0	0	0	0	1
327	21	3	A only	0	1	0	1	0	0	0	0	0	0	0	0	0	0	0	0	0	1
328	21	3	A only	0	1	0	1	0	0	0	0	0	0	0	0	0	0	0	0	0	1
329	21	3	A only	0	1	0	1	0	0	0	0	0	0	0	0	0	0	0	0	0	1
330	21	4	A only	0	0	0	0	0	0	0	0	0	0	0	0	0	0	0	0	0	0
331	21	5	A only	0	0	0	0	0	0	0	0	0	0	0	0	0	0	0	0	0	0
332	21	6	A only	0	0	0	0	0	0	0	0	0	0	0	0	0	0	0	0	0	0
333	21	7	A only	0	0	0	0	0	0	0	0	1	0	0	0	0	0	0	0	1	1
334	21	7	A only	0	0	0	0	0	0	0	1	0	0	0	0	0	0	0	0	1	1
335	21	7	A only	0	0	0	0	0	0	0	1	0	0	0	0	0	0	0	0	1	1
336	21	7	A only	0	1	0	1	0	0	0	0	0	0	0	0	0	0	0	0	0	1
337	21	7	A only	0	1	0	1	0	0	0	0	0	0	0	0	0	0	0	0	0	1
338	21	7	A only	0	1	0	1	0	0	0	0	0	0	0	0	0	0	0	0	0	1
339	21	7	A only	0	1	0	1	0	0	0	0	0	0	0	0	0	0	0	0	0	1
340	21	7	A only	0	1	0	1	0	0	0	0	0	0	0	0	0	0	0	0	0	1
341	21	7	A only	0	1	0	1	0	0	0	0	0	0	0	0	0	0	0	0	0	1
342	21	7	A only	0	1	0	1	0	0	0	0	0	0	0	0	0	0	0	0	0	1
343	21	7	A only	0	1	0	1	0	0	0	0	0	0	0	0	0	0	0	0	0	1
344	21	8	A only	0	1	0	1	0	0	0	0	0	0	0	0	0	0	0	0	0	1
345	21	8	A only	0	1	0	1	0	0	0	0	0	0	0	0	0	0	0	0	0	1
346	21	8	A only	0	1	0	1	0	0	0	0	0	0	0	0	0	0	0	0	0	1
347	21	8	A only	0	1	0	1	0	0	0	0	0	0	0	0	0	0	0	0	0	1
348	21	8	A only	0	0	0	0	0	0	0	0	1	0	0	0	0	0	0	0	1	1
349	21	8	A only	0	1	0	1	0	0	0	0	0	0	0	0	0	0	0	0	0	1
350	21	9	A only	0	0	0	0	0	0	0	0	0	0	0	0	0	0	0	0	0	0
351	21	10	A only	0	0	0	0	0	0	0	0	0	0	0	0	0	0	0	0	0	0
352	21	11	A only	0	0	0	0	0	0	0	0	0	0	0	0	0	0	0	0	0	0
353	21	12	A only	1	0	0	1	0	0	0	0	0	0	0	0	0	0	0	0	0	1
354	21	12	A only	1	0	0	1	0	0	0	0	0	0	0	0	0	0	0	0	0	1
355	21	12	A only	0	1	0	1	0	0	0	0	0	0	0	0	0	0	0	0	0	1
356	21	12	A only	0	1	0	1	0	0	0	0	0	0	0	0	0	0	0	0	0	1
357	21	12	A only	0	1	0	1	0	0	0	0	0	0	0	0	0	0	0	0	0	1
358	21	12	A only	0	1	0	1	0	0	0	0	0	0	0	0	0	0	0	0	0	1
359	21	12	A only	0	1	0	1	0	0	0	0	0	0	0	0	0	0	0	0	0	1
360	21	12	A only	0	1	0	1	0	0	0	0	0	0	0	0	0	0	0	0	0	1
361	21	13	A only	0	0	0	0	0	0	0	0	0	0	0	0	0	0	0	0	0	0
362	21	14	A only	0	0	0	0	0	0	0	0	0	0	0	0	0	0	0	0	0	0
363	21	15	A only	1	0	0	1	0	0	0	0	0	0	0	0	0	0	0	0	0	1
364	21	15	A only	1	0	0	1	0	0	0	0	0	0	0	0	0	0	0	0	0	1
365	21	15	A only	0	1	0	1	0	0	0	0	0	0	0	0	0	0	0	0	0	1
366	21	15	A only	1	0	0	1	0	0	0	0	0	0	0	0	0	0	0	0	0	1
367	21	15	A only	0	0	0	0	0	0	0	0	0	0	0	0	0	0	0	0	0	0
368	21	16	A only	1	0	0	1	0	0	0	0	0	0	0	0	0	0	0	0	0	1
369	21	16	A only	1	0	0	1	0	0	0	0	0	0	0	0	0	0	0	0	0	1
370	21	16	A only	0	1	0	1	0	0	0	0	0	0	0	0	0	0	0	0	0	1
371	21	17	A only	0	1	0	1	0	0	0	0	0	0	0	0	0	0	0	0	0	1
372	21	17	A only	0	0	0	0	0	0	0	0	0	0	0	0	0	0	0	0	0	0
373	21	18	A only	0	0	0	0	0	0	0	0	0	0	0	0	0	0	0	0	0	0
374	21	19	A only	0	0	0	0	0	0	0	0	0	0	0	0	0	0	0	0	0	0
375	21	20	A only	0	0	0	0	0	0	0	0	0	0	0	0	0	0	0	0	0	0
376	21	21	A only	0	0	0	0	0	0	0	0	0	0	0	0	0	0	0	0	0	0
377	21	22	A only	1	0	0	1	0	0	0	0	0	0	0	0	0	0	0	0	0	1
378	21	22	A only	0	1	0	1	0	0	0	0	0	0	0	0	0	0	0	0	0	1
379	21	22	A only	0	1	0	1	0	0	0	0	0	0	0	0	0	0	0	0	0	1
380	21	22	A only	0	1	0	1	0	0	0	0	0	0	0	0	0	0	0	0	0	1
381	21	22	A only	0	1	0	1	0	0	0	0	0	0	0	0	0	0	0	0	0	1
382	21	22	A only	0	1	0	1	0	0	0	0	0	0	0	0	0	0	0	0	0	1
383	21	22	A only	0	1	0	1	0	0	0	0	0	0	0	0	0	0	0	0	0	1
384	21	22	A only	0	1	0	1	0	0	0	0	0	0	0	0	0	0	0	0	0	1
385	21	22	A only	0	1	0	1	0	0	0	0	0	0	0	0	0	0	0	0	0	1
386	21	22	A only	0	1	0	1	0	0	0	0	0	0	0	0	0	0	0	0	0	1
387	21	22	A only	0	1	0	1	0	0	0	0	0	0	0	0	0	0	0	0	0	1
388	21	23	A only	0	1	0	1	0	0	0	0	0	0	0	0	0	0	0	0	0	1
389	21	23	A only	0	0	0	0	0	0	0	0	0	1	0	0	0	0	0	0	1	1
390	21	23	A only	0	1	0	1	0	0	0	0	0	0	0	0	0	0	0	0	0	1
391	21	23	A only	0	1	0	1	0	0	0	0	0	0	0	0	0	0	0	0	0	1
392	21	23	A only	0	0	0	0	0	0	0	0	1	0	0	0	0	0	0	0	1	1
393	21	23	A only	0	0	0	0	0	0	0	0	0	1	0	0	0	0	0	0	1	1
394	21	23	A only	0	0	0	0	1	0	0	0	0	0	0	0	0	0	0	0	1	1
395	21	23	A only	0	0	0	0	1	0	0	0	0	0	0	0	0	0	0	0	1	1
396	21	23	A only	0	1	0	1	0	0	0	0	0	0	0	0	0	0	0	0	0	1
397	21	23	A only	0	1	0	1	0	0	0	0	0	0	0	0	0	0	0	0	0	1
398	21	23	A only	0	0	0	0	0	0	0	0	0	0	0	0	0	0	0	0	0	0
399	21	24	A only	0	0	0	0	0	0	0	0	0	0	0	0	0	0	0	0	0	0
400	21	24	A only	0	0	0	0	0	0	0	0	0	0	0	0	0	0	0	0	0	0
401	21	25	A only	0	0	0	0	0	0	0	0	0	0	0	0	0	0	0	0	0	0
402	21	26	A only	0	0	0	0	0	0	0	0	0	0	0	0	0	0	0	0	0	0
403	21	27	A only	0	0	0	0	0	0	0	0	0	0	0	0	0	0	0	0	0	0
404	21	28	A only	0	0	0	0	0	0	0	0	1	0	0	0	0	0	0	0	1	1
405	21	29	A only	0	1	0	1	0	0	0	0	0	0	0	0	0	0	0	0	0	1
406	21	29	A only	0	0	0	0	0	0	0	0	1	0	0	0	0	0	0	0	1	1
407	21	29	A only	0	1	0	1	0	0	0	0	0	0	0	0	0	0	0	0	0	1
408	21	29	A only	0	1	0	1	0	0	0	0	0	0	0	0	0	0	0	0	0	1
409	21	29	A only	0	0	0	0	0	0	0	0	0	0	0	0	0	0	0	0	0	0
410	21	29	A only	0	0	0	0	0	0	0	0	0	0	0	0	0	0	0	0	0	0
411	21	30	A only	0	0	0	0	0	0	0	0	1	0	0	0	0	0	0	0	1	1
412	21	30	A only	0	1	0	1	0	0	0	0	0	0	0	0	0	0	0	0	0	1
413	21	30	A only	0	1	0	1	0	0	0	0	0	0	0	0	0	0	0	0	0	1
414	21	30	A only	0	0	0	0	0	0	0	1	0	0	0	0	0	0	0	0	1	1
415	20	1	WF only	0	0	0	0	0	0	0	0	0	1	0	0	0	0	0	0	1	1
416	20	1	WF only	0	0	0	0	0	0	0	0	0	0	0	0	0	0	0	0	0	0
417	20	2	WF only	0	1	0	1	0	0	0	0	0	0	0	0	0	0	0	0	0	1
418	20	3	WF only	0	0	0	0	0	0	0	0	0	0	0	0	0	0	0	0	0	0
419	20	4	WF only	0	0	0	0	0	0	0	0	0	0	0	0	0	0	0	0	0	0
420	20	5	WF only	0	0	0	0	0	0	0	0	0	0	0	0	0	0	0	0	0	0
421	20	6	WF only	1	0	0	1	0	0	0	0	0	0	0	0	0	0	0	0	0	1
422	20	6	WF only	0	0	0	0	0	0	0	1	0	0	0	0	0	0	0	0	1	1
423	20	6	WF only	0	1	0	1	0	0	0	0	0	0	0	0	0	0	0	0	0	1
424	20	6	WF only	0	1	0	1	0	0	0	0	0	0	0	0	0	0	0	0	0	1
425	20	6	WF only	0	1	0	1	0	0	0	0	0	0	0	0	0	0	0	0	0	1
426	20	7	WF only	0	1	0	1	0	0	0	0	0	0	0	0	0	0	0	0	0	1
427	20	7	WF only	0	1	0	1	0	0	0	0	0	0	0	0	0	0	0	0	0	1
428	20	7	WF only	0	1	0	1	0	0	0	0	0	0	0	0	0	0	0	0	0	1
429	20	8	WF only	0	0	0	0	0	0	0	0	0	0	0	0	0	0	0	0	0	0
430	20	9	WF only	1	0	0	1	0	0	0	0	0	0	0	0	0	0	0	0	0	1
431	20	9	WF only	0	0	0	0	1	0	0	0	0	0	0	0	0	0	0	0	1	1
432	20	10	WF only	0	0	0	0	0	0	0	0	0	0	0	0	0	0	0	0	0	0
433	20	11	WF only	1	0	0	1	0	0	0	0	0	0	0	0	0	0	0	0	0	1
434	20	11	WF only	1	0	0	1	0	0	0	0	0	0	0	0	0	0	0	0	0	1
435	20	11	WF only	0	1	0	1	0	0	0	0	0	0	0	0	0	0	0	0	0	1
436	20	11	WF only	0	1	0	1	0	0	0	0	0	0	0	0	0	0	0	0	0	1
437	20	11	WF only	0	0	0	0	0	0	0	0	0	0	0	0	0	0	0	0	0	0
438	20	12	WF only	0	1	0	1	0	0	0	0	0	0	0	0	0	0	0	0	0	1
439	20	12	WF only	0	0	0	0	0	0	0	0	0	0	0	0	0	0	0	0	0	0
440	20	12	WF only	0	0	0	0	0	0	0	0	0	0	0	0	0	0	0	0	0	0
441	20	13	WF only	1	0	0	1	0	0	0	0	0	0	0	0	0	0	0	0	0	1
442	20	13	WF only	1	0	0	1	0	0	0	0	0	0	0	0	0	0	0	0	0	1
443	20	13	WF only	1	0	0	1	0	0	0	0	0	0	0	0	0	0	0	0	0	1
444	20	13	WF only	0	1	0	1	0	0	0	0	0	0	0	0	0	0	0	0	0	1
445	20	13	WF only	0	1	0	1	0	0	0	0	0	0	0	0	0	0	0	0	0	1
446	20	13	WF only	0	1	0	1	0	0	0	0	0	0	0	0	0	0	0	0	0	1
447	20	14	WF only	0	0	0	0	0	0	0	0	0	0	0	0	0	0	0	0	0	0
448	20	14	WF only	0	1	0	1	0	0	0	0	0	0	0	0	0	0	0	0	0	1
449	20	14	WF only	0	0	0	0	0	0	0	0	0	0	0	0	0	0	0	0	0	0
450	20	15	WF only	0	1	0	1	0	0	0	0	0	0	0	0	0	0	0	0	0	1
451	20	15	WF only	0	1	0	1	0	0	0	0	0	0	0	0	0	0	0	0	0	1
452	20	15	WF only	0	1	0	1	0	0	0	0	0	0	0	0	0	0	0	0	0	1
453	20	15	WF only	0	1	0	1	0	0	0	0	0	0	0	0	0	0	0	0	0	1
454	20	15	WF only	0	1	0	1	0	0	0	0	0	0	0	0	0	0	0	0	0	1
455	20	15	WF only	0	0	0	0	0	0	0	0	0	0	0	0	0	0	0	0	0	0
456	20	16	WF only	0	0	0	0	0	0	0	0	0	0	0	0	0	0	0	0	0	0
457	20	17	WF only	0	0	0	0	0	1	0	0	0	0	0	0	0	0	0	0	1	1
458	20	17	WF only	0	0	0	0	0	1	0	0	0	0	0	0	0	0	0	0	1	1
459	20	17	WF only	0	0	0	0	0	1	0	0	0	0	0	0	0	0	0	0	1	1
460	20	18	WF only	0	1	0	1	0	0	0	0	0	0	0	0	0	0	0	0	0	1
461	20	18	WF only	0	0	0	0	0	0	0	0	0	0	0	0	0	0	0	0	0	0
462	20	19	WF only	1	0	0	1	0	0	0	0	0	0	0	0	0	0	0	0	0	1
463	20	19	WF only	1	0	0	1	0	0	0	0	0	0	0	0	0	0	0	0	0	1
464	20	19	WF only	0	1	0	1	0	0	0	0	0	0	0	0	0	0	0	0	0	1
465	20	19	WF only	0	1	0	1	0	0	0	0	0	0	0	0	0	0	0	0	0	1
466	20	19	WF only	0	1	0	1	0	0	0	0	0	0	0	0	0	0	0	0	0	1
467	20	19	WF only	0	0	0	0	0	0	0	0	0	0	0	0	0	0	0	0	0	0
468	19	1	A + WF	0	0	0	0	0	0	0	0	0	0	0	0	0	0	0	0	0	0
469	19	2	A + WF	1	0	0	1	0	0	0	0	0	0	0	0	0	0	0	0	0	1
470	19	2	A + WF	1	0	0	1	0	0	0	0	0	0	0	0	0	0	0	0	0	1
471	19	2	A + WF	0	1	0	1	0	0	0	0	0	0	0	0	0	0	0	0	0	1
472	19	2	A + WF	0	1	0	1	0	0	0	0	0	0	0	0	0	0	0	0	0	1
473	19	2	A + WF	0	1	0	1	0	0	0	0	0	0	0	0	0	0	0	0	0	1
474	19	2	A + WF	0	0	0	0	0	0	0	0	0	0	0	0	0	1	0	0	1	1
475	19	2	A + WF	0	1	0	1	0	0	0	0	0	0	0	0	0	0	0	0	0	1
476	19	2	A + WF	0	0	0	0	0	0	0	0	1	0	0	0	0	0	0	0	1	1
477	19	2	A + WF	0	0	0	0	0	0	0	1	0	0	0	0	0	0	0	0	1	1
478	19	2	A + WF	0	1	0	1	0	0	0	0	0	0	0	0	0	0	0	0	0	1
479	19	2	A + WF	0	1	0	1	0	0	0	0	0	0	0	0	0	0	0	0	0	1
480	19	3	A + WF	0	1	0	1	0	0	0	0	0	0	0	0	0	0	0	0	0	1
481	19	3	A + WF	0	1	0	1	0	0	0	0	0	0	0	0	0	0	0	0	0	1
482	19	3	A + WF	0	1	0	1	0	0	0	0	0	0	0	0	0	0	0	0	0	1
483	19	3	A + WF	0	0	0	0	0	0	0	0	1	0	0	0	0	0	0	0	1	1
484	19	3	A + WF	0	1	0	1	0	0	0	0	0	0	0	0	0	0	0	0	0	1
485	19	3	A + WF	0	1	0	1	0	0	0	0	0	0	0	0	0	0	0	0	0	1
486	19	3	A + WF	0	1	0	1	0	0	0	0	0	0	0	0	0	0	0	0	0	1
487	19	3	A + WF	0	1	0	1	0	0	0	0	0	0	0	0	0	0	0	0	0	1
488	19	3	A + WF	0	1	0	1	0	0	0	0	0	0	0	0	0	0	0	0	0	1
489	19	3	A + WF	0	1	0	1	0	0	0	0	0	0	0	0	0	0	0	0	0	1
490	19	3	A + WF	0	1	0	1	0	0	0	0	0	0	0	0	0	0	0	0	0	1
491	19	4	A + WF	0	0	0	0	0	0	0	0	0	0	1	0	1	0	0	0	1	1
492	19	4	A + WF	0	1	0	1	0	0	0	0	0	0	0	0	0	0	0	0	0	1
493	19	4	A + WF	0	1	0	1	0	0	0	0	0	0	0	0	0	0	0	0	0	1
494	19	4	A + WF	0	0	0	0	0	0	0	0	0	0	0	0	0	1	0	0	1	1
495	19	4	A + WF	0	0	0	0	0	0	0	0	0	0	0	0	0	1	0	0	1	1
496	19	4	A + WF	0	0	0	0	0	0	0	0	1	0	0	0	0	0	0	0	1	1
497	19	4	A + WF	0	1	0	1	0	0	0	0	0	0	0	0	0	0	0	0	0	1
498	19	4	A + WF	0	0	0	0	0	0	0	0	0	0	0	0	0	0	0	1	1	1
499	19	4	A + WF	0	1	0	1	0	0	0	0	0	0	0	0	0	0	0	0	0	1
500	19	4	A + WF	0	0	0	0	0	0	0	1	0	0	0	0	0	0	0	0	1	1
501	19	5	A + WF	0	1	0	1	0	0	0	0	0	0	0	0	0	0	0	0	0	1
502	19	5	A + WF	0	1	0	1	0	0	0	0	0	0	0	0	0	0	0	0	0	1
503	19	5	A + WF	0	0	0	0	0	0	0	0	0	1	0	0	0	0	0	0	1	1
504	19	5	A + WF	0	1	0	1	0	0	0	0	0	0	0	0	0	0	0	0	0	1
505	19	5	A + WF	0	1	0	1	0	0	0	0	0	0	0	0	0	0	0	0	0	1
506	19	5	A + WF	0	0	0	0	1	0	0	0	0	0	0	0	0	0	0	0	1	1
507	19	5	A + WF	0	0	0	0	0	0	0	1	0	0	0	0	0	0	0	0	1	1
508	19	6	A + WF	0	0	0	0	0	0	0	1	0	0	0	0	0	0	0	0	1	1
509	19	7	A + WF	0	0	0	0	0	0	0	0	0	0	0	0	0	0	0	0	0	0
510	19	8	A + WF	0	0	0	0	0	0	0	0	0	0	0	0	0	0	0	0	0	0
511	19	9	A + WF	0	1	0	1	0	0	0	0	0	0	0	0	0	0	0	0	0	1
512	19	9	A + WF	0	0	0	0	0	0	0	1	0	0	0	0	0	0	0	0	1	1
513	19	9	A + WF	0	1	0	1	0	0	0	0	0	0	0	0	0	0	0	0	0	1
514	19	9	A + WF	0	1	0	1	0	0	0	0	0	0	0	0	0	0	0	0	0	1
515	19	9	A + WF	0	1	0	1	0	0	0	0	0	0	0	0	0	0	0	0	0	1
516	19	9	A + WF	0	1	0	1	0	0	0	0	0	0	0	0	0	0	0	0	0	1
517	19	9	A + WF	0	1	0	1	0	0	0	0	0	0	0	0	0	0	0	0	0	1
518	19	9	A + WF	0	0	0	0	0	0	0	0	0	0	0	0	0	0	0	0	0	0
519	19	10	A + WF	0	0	0	0	0	0	0	0	1	0	0	0	0	0	0	0	1	1
520	19	10	A + WF	0	1	0	1	0	0	0	0	0	0	0	0	0	0	0	0	0	1
521	19	10	A + WF	0	0	0	0	0	0	0	0	0	0	1	0	1	0	0	0	1	1
522	19	10	A + WF	0	1	0	1	0	0	0	0	0	0	0	0	0	0	0	0	0	1
523	19	10	A + WF	0	1	0	1	0	0	0	0	0	0	0	0	0	0	0	0	0	1
524	19	10	A + WF	0	1	0	1	0	0	0	0	0	0	0	0	0	0	0	0	0	1
525	19	10	A + WF	0	1	0	1	0	0	0	0	0	0	0	0	0	0	0	0	0	1
526	19	10	A + WF	0	1	0	1	0	0	0	0	0	0	0	0	0	0	0	0	0	1
527	19	11	A + WF	0	0	0	0	0	0	0	0	1	0	0	0	0	0	0	0	1	1
528	19	11	A + WF	0	0	0	0	0	0	0	0	1	0	0	0	0	0	0	0	1	1
529	19	11	A + WF	0	1	0	1	0	0	0	0	0	0	0	0	0	0	0	0	0	1
530	19	11	A + WF	0	0	0	0	0	0	0	1	0	0	0	0	0	0	0	0	1	1
531	19	11	A + WF	0	0	0	0	0	0	0	0	0	1	0	0	0	0	0	0	1	1
532	19	11	A + WF	0	1	0	1	0	0	0	0	0	0	0	0	0	0	0	0	0	1
533	19	11	A + WF	0	0	0	0	0	0	0	0	1	0	0	0	0	0	0	0	1	1
534	19	11	A + WF	0	0	0	0	0	0	0	0	1	0	0	0	0	0	0	0	1	1
535	19	11	A + WF	0	0	0	0	0	0	0	0	0	1	0	0	0	0	0	0	1	1
536	19	11	A + WF	0	1	0	1	0	0	0	0	0	0	0	0	0	0	0	0	0	1
537	19	12	A + WF	1	0	0	1	0	0	0	0	0	0	0	0	0	0	0	0	0	1
538	19	12	A + WF	1	0	0	1	0	0	0	0	0	0	0	0	0	0	0	0	0	1
539	19	12	A + WF	1	0	0	1	0	0	0	0	0	0	0	0	0	0	0	0	0	1
540	19	12	A + WF	0	1	0	1	0	0	0	0	0	0	0	0	0	0	0	0	0	1
541	19	12	A + WF	0	1	0	1	0	0	0	0	0	0	0	0	0	0	0	0	0	1
542	19	12	A + WF	0	1	0	1	0	0	0	0	0	0	0	0	0	0	0	0	0	1
543	19	13	A + WF	1	0	0	1	0	0	0	0	0	0	0	0	0	0	0	0	0	1
544	19	14	A + WF	1	0	0	1	0	0	0	0	0	0	0	0	0	0	0	0	0	1
545	19	14	A + WF	1	0	0	1	0	0	0	0	0	0	0	0	0	0	0	0	0	1
546	19	14	A + WF	1	0	0	1	0	0	0	0	0	0	0	0	0	0	0	0	0	1
547	19	14	A + WF	1	0	0	1	0	0	0	0	0	0	0	0	0	0	0	0	0	1
548	19	14	A + WF	1	0	0	1	0	0	0	0	0	0	0	0	0	0	0	0	0	1
549	19	14	A + WF	0	1	0	1	0	0	0	0	0	0	0	0	0	0	0	0	0	1
550	19	14	A + WF	0	0	0	0	0	0	0	0	0	0	0	0	0	0	0	0	0	0
551	19	15	A + WF	0	0	0	0	0	0	0	1	0	0	0	0	0	0	0	0	1	1
552	19	15	A + WF	0	0	0	0	0	0	0	0	0	1	0	0	0	0	0	0	1	1
553	19	15	A + WF	0	0	0	0	0	0	0	0	0	0	1	0	1	0	0	0	1	1
554	19	15	A + WF	0	0	0	0	0	0	0	0	0	1	0	0	0	0	0	0	1	1
555	19	15	A + WF	0	0	0	0	0	0	0	0	1	0	0	0	0	0	0	0	1	1
556	19	15	A + WF	0	0	0	0	0	0	0	0	1	0	0	0	0	0	0	0	1	1
557	19	15	A + WF	0	0	0	0	0	0	0	0	1	0	0	0	0	0	0	0	1	1
558	19	15	A + WF	0	1	0	1	0	0	0	0	0	0	0	0	0	0	0	0	0	1
559	19	15	A + WF	0	0	0	0	0	0	0	0	0	1	0	0	0	0	0	0	1	1
560	19	15	A + WF	0	1	0	1	0	0	0	0	0	0	0	0	0	0	0	0	0	1
561	19	16	A + WF	0	1	0	1	0	0	0	0	0	0	0	0	0	0	0	0	0	1
562	19	16	A + WF	0	1	0	1	0	0	0	0	0	0	0	0	0	0	0	0	0	1
563	19	16	A + WF	0	0	0	0	0	0	0	0	1	0	0	0	0	0	0	0	1	1
564	19	16	A + WF	0	1	0	1	0	0	0	0	0	0	0	0	0	0	0	0	0	1
565	19	16	A + WF	0	1	0	1	0	0	0	0	0	0	0	0	0	0	0	0	0	1
566	19	16	A + WF	0	1	0	1	0	0	0	0	0	0	0	0	0	0	0	0	0	1
567	19	16	A + WF	0	0	0	0	0	0	0	1	0	0	0	0	0	0	0	0	1	1
568	19	16	A + WF	0	0	0	0	0	0	0	0	0	0	0	0	0	0	0	1	1	1
569	19	16	A + WF	0	1	0	1	0	0	0	0	0	0	0	0	0	0	0	0	0	1
570	19	16	A + WF	0	0	0	0	0	0	0	0	0	0	0	0	0	0	0	0	0	0
571	19	17	A + WF	0	0	0	0	0	0	0	0	0	0	0	0	0	0	0	0	0	0
572	19	18	A + WF	1	0	0	1	0	0	0	0	0	0	0	0	0	0	0	0	0	1
573	19	18	A + WF	1	0	0	1	0	0	0	0	0	0	0	0	0	0	0	0	0	1
574	19	18	A + WF	1	0	0	1	0	0	0	0	0	0	0	0	0	0	0	0	0	1
575	19	18	A + WF	0	1	0	1	0	0	0	0	0	0	0	0	0	0	0	0	0	1
576	19	18	A + WF	0	0	0	0	0	0	0	0	1	0	0	0	0	0	0	0	1	1
577	19	18	A + WF	0	0	0	0	0	0	0	0	0	1	0	0	0	0	0	0	1	1
578	19	18	A + WF	0	1	0	1	0	0	0	0	0	0	0	0	0	0	0	0	0	1
579	19	18	A + WF	0	0	0	0	0	1	0	0	0	0	0	0	0	0	0	0	1	1
580	19	18	A + WF	0	1	0	1	0	0	0	0	0	0	0	0	0	0	0	0	0	1
581	19	18	A + WF	0	0	0	0	0	0	0	1	0	0	0	0	0	0	0	0	1	1
582	19	19	A + WF	0	0	0	0	0	0	0	0	1	0	0	0	0	0	0	0	1	1
583	19	19	A + WF	1	0	0	1	0	0	0	0	0	0	0	0	0	0	0	0	0	1
584	19	19	A + WF	0	0	0	0	0	0	0	0	0	0	0	1	1	0	0	0	1	1
585	19	19	A + WF	1	0	0	1	0	0	0	0	0	0	0	0	0	0	0	0	0	1
586	19	19	A + WF	0	1	0	1	0	0	0	0	0	0	0	0	0	0	0	0	0	1
587	19	19	A + WF	0	1	0	1	0	0	0	0	0	0	0	0	0	0	0	0	0	1
588	19	19	A + WF	0	0	0	0	0	0	0	0	1	0	0	0	0	0	0	0	1	1
589	19	19	A + WF	0	1	0	1	0	0	0	0	0	0	0	0	0	0	0	0	0	1
590	19	19	A + WF	0	1	0	1	0	0	0	0	0	0	0	0	0	0	0	0	0	1
591	18	1	WF only	0	0	0	0	0	0	0	0	1	0	0	0	0	0	0	0	1	1
592	18	1	WF only	0	0	0	0	0	0	0	0	1	0	0	0	0	0	0	0	1	1
593	18	1	WF only	0	1	0	1	0	0	0	0	0	0	0	0	0	0	0	0	0	1
594	18	1	WF only	0	1	0	1	0	0	0	0	0	0	0	0	0	0	0	0	0	1
595	18	1	WF only	0	1	0	1	0	0	0	0	0	0	0	0	0	0	0	0	0	1
596	18	1	WF only	0	1	0	1	0	0	0	0	0	0	0	0	0	0	0	0	0	1
597	18	1	WF only	0	1	0	1	0	0	0	0	0	0	0	0	0	0	0	0	0	1
598	18	1	WF only	0	1	0	1	0	0	0	0	0	0	0	0	0	0	0	0	0	1
599	18	1	WF only	0	0	0	0	0	0	0	1	0	0	0	0	0	0	0	0	1	1
600	18	2	WF only	0	0	0	0	0	0	0	0	0	0	0	0	0	0	0	0	0	0
601	18	3	WF only	0	1	0	1	0	0	0	0	0	0	0	0	0	0	0	0	0	1
602	18	3	WF only	0	0	0	0	0	0	0	0	1	0	0	0	0	0	0	0	1	1
603	18	3	WF only	0	1	0	1	0	0	0	0	0	0	0	0	0	0	0	0	0	1
604	18	3	WF only	0	1	0	1	0	0	0	0	0	0	0	0	0	0	0	0	0	1
605	18	3	WF only	0	1	0	1	0	0	0	0	0	0	0	0	0	0	0	0	0	1
606	18	3	WF only	0	0	0	0	0	0	0	0	1	0	0	0	0	0	0	0	1	1
607	18	3	WF only	0	1	0	1	0	0	0	0	0	0	0	0	0	0	0	0	0	1
608	18	3	WF only	0	1	0	1	0	0	0	0	0	0	0	0	0	0	0	0	0	1
609	18	3	WF only	0	1	0	1	0	0	0	0	0	0	0	0	0	0	0	0	0	1
610	18	3	WF only	0	0	0	0	0	0	0	0	1	0	0	0	0	0	0	0	1	1
611	18	3	WF only	0	1	0	1	0	0	0	0	0	0	0	0	0	0	0	0	0	1
612	18	4	WF only	1	0	0	1	0	0	0	0	0	0	0	0	0	0	0	0	0	1
613	18	4	WF only	1	0	0	1	0	0	0	0	0	0	0	0	0	0	0	0	0	1
614	18	4	WF only	0	0	0	0	0	0	0	0	0	0	0	0	0	0	0	0	0	0
615	18	5	WF only	0	0	0	0	0	0	0	0	0	0	0	0	0	0	0	0	0	0
616	18	6	WF only	0	0	0	0	1	0	0	0	0	0	0	0	0	0	0	0	1	1
617	18	6	WF only	0	1	0	1	0	0	0	0	0	0	0	0	0	0	0	0	0	1
618	18	6	WF only	0	1	0	1	0	0	0	0	0	0	0	0	0	0	0	0	0	1
619	18	6	WF only	0	1	0	1	0	0	0	0	0	0	0	0	0	0	0	0	0	1
620	18	6	WF only	0	1	0	1	0	0	0	0	0	0	0	0	0	0	0	0	0	1
621	18	6	WF only	0	1	0	1	0	0	0	0	0	0	0	0	0	0	0	0	0	1
622	18	6	WF only	0	1	0	1	0	0	0	0	0	0	0	0	0	0	0	0	0	1
623	18	6	WF only	0	1	0	1	0	0	0	0	0	0	0	0	0	0	0	0	0	1
624	18	6	WF only	0	1	0	1	0	0	0	0	0	0	0	0	0	0	0	0	0	1
625	18	6	WF only	0	1	0	1	0	0	0	0	0	0	0	0	0	0	0	0	0	1
626	18	6	WF only	0	1	0	1	0	0	0	0	0	0	0	0	0	0	0	0	0	1
627	18	7	WF only	0	0	0	0	0	0	0	0	0	0	0	0	0	0	0	0	0	0
628	18	8	WF only	0	0	0	0	0	0	0	0	0	0	0	0	0	0	0	1	1	1
629	18	8	WF only	0	0	0	0	0	0	0	0	0	0	0	0	0	0	0	0	0	0
630	18	9	WF only	0	0	0	0	0	0	0	0	0	0	0	0	0	0	0	0	0	0
631	18	9	WF only	0	0	0	0	0	0	0	1	0	0	0	0	0	0	0	0	1	1
632	18	9	WF only	0	0	0	0	0	0	0	1	0	0	0	0	0	0	0	0	1	1
633	18	9	WF only	0	0	0	0	0	0	0	0	1	0	0	0	0	0	0	0	1	1
634	18	9	WF only	0	0	0	0	0	0	0	0	1	0	0	0	0	0	0	0	1	1
635	18	9	WF only	0	0	0	0	0	0	0	0	1	0	0	0	0	0	0	0	1	1
636	18	9	WF only	0	1	0	1	0	0	0	0	0	0	0	0	0	0	0	0	0	1
637	18	9	WF only	0	1	0	1	0	0	0	0	0	0	0	0	0	0	0	0	0	1
638	18	9	WF only	0	0	0	0	0	0	0	0	1	0	0	0	0	0	0	0	1	1
639	18	10	WF only	1	0	0	1	0	0	0	0	0	0	0	0	0	0	0	0	0	1
640	18	10	WF only	0	1	0	1	0	0	0	0	0	0	0	0	0	0	0	0	0	1
641	18	10	WF only	0	0	0	0	0	0	0	0	0	0	0	0	0	0	0	0	0	0
642	18	10	WF only	0	0	0	0	0	0	0	0	1	0	0	0	0	0	0	0	1	1
643	18	11	WF only	0	0	0	0	0	0	0	1	0	0	0	0	0	0	0	0	1	1
644	18	11	WF only	0	0	0	0	0	0	0	0	0	0	0	0	0	0	0	0	0	0
645	18	12	WF only	0	0	0	0	0	0	0	1	0	0	0	0	0	0	0	0	1	1
646	18	12	WF only	0	1	0	1	0	0	0	0	0	0	0	0	0	0	0	0	0	1
647	18	12	WF only	0	1	0	1	0	0	0	0	0	0	0	0	0	0	0	0	0	1
648	18	12	WF only	0	1	0	1	0	0	0	0	0	0	0	0	0	0	0	0	0	1
649	18	12	WF only	0	1	0	1	0	0	0	0	0	0	0	0	0	0	0	0	0	1
650	18	12	WF only	0	1	0	1	0	0	0	0	0	0	0	0	0	0	0	0	0	1
651	18	12	WF only	0	1	0	1	0	0	0	0	0	0	0	0	0	0	0	0	0	1
652	18	12	WF only	0	0	0	0	0	0	0	0	0	1	0	0	0	0	0	0	1	1
653	18	12	WF only	0	0	0	0	0	0	0	1	0	0	0	0	0	0	0	0	1	1
654	18	13	WF only	0	1	0	1	0	0	0	0	0	0	0	0	0	0	0	0	0	1
655	18	13	WF only	0	1	0	1	0	0	0	0	0	0	0	0	0	0	0	0	0	1
656	18	13	WF only	0	0	0	0	0	0	0	0	0	0	0	0	0	0	0	0	0	0
657	18	13	WF only	0	0	0	0	0	0	0	0	0	0	0	0	0	0	0	0	0	0
658	18	14	WF only	1	0	0	1	0	0	0	0	0	0	0	0	0	0	0	0	0	1
659	18	14	WF only	1	0	0	1	0	0	0	0	0	0	0	0	0	0	0	0	0	1
660	18	14	WF only	1	0	0	1	0	0	0	0	0	0	0	0	0	0	0	0	0	1
661	18	14	WF only	1	0	0	1	0	0	0	0	0	0	0	0	0	0	0	0	0	1
662	18	14	WF only	0	1	0	1	0	0	0	0	0	0	0	0	0	0	0	0	0	1
663	18	14	WF only	0	1	0	1	0	0	0	0	0	0	0	0	0	0	0	0	0	1
664	18	14	WF only	0	1	0	1	0	0	0	0	0	0	0	0	0	0	0	0	0	1
665	18	14	WF only	0	1	0	1	0	0	0	0	0	0	0	0	0	0	0	0	0	1
666	18	14	WF only	0	1	0	1	0	0	0	0	0	0	0	0	0	0	0	0	0	1
667	18	14	WF only	0	1	0	1	0	0	0	0	0	0	0	0	0	0	0	0	0	1
668	18	15	WF only	0	0	0	0	0	1	0	0	0	0	0	0	0	0	0	0	1	1
669	18	15	WF only	0	0	0	0	0	1	0	0	0	0	0	0	0	0	0	0	1	1
670	18	15	WF only	0	0	0	0	0	1	0	0	0	0	0	0	0	0	0	0	1	1
671	18	15	WF only	0	0	0	0	0	1	0	0	0	0	0	0	0	0	0	0	1	1
672	18	15	WF only	0	0	0	0	0	1	0	0	0	0	0	0	0	0	0	0	1	1
673	18	15	WF only	0	0	0	0	0	1	0	0	0	0	0	0	0	0	0	0	1	1
674	18	16	WF only	0	0	0	0	0	0	0	0	0	0	0	0	0	0	0	0	0	0
675	17	1	A only	1	0	0	1	0	0	0	0	0	0	0	0	0	0	0	0	0	1
676	17	1	A only	1	0	0	1	0	0	0	0	0	0	0	0	0	0	0	0	0	1
677	17	1	A only	0	1	0	1	0	0	0	0	0	0	0	0	0	0	0	0	0	1
678	17	1	A only	0	1	0	1	0	0	0	0	0	0	0	0	0	0	0	0	0	1
679	17	1	A only	0	1	0	1	0	0	0	0	0	0	0	0	0	0	0	0	0	1
680	17	1	A only	0	1	0	1	0	0	0	0	0	0	0	0	0	0	0	0	0	1
681	17	1	A only	0	1	0	1	0	0	0	0	0	0	0	0	0	0	0	0	0	1
682	17	1	A only	0	1	0	1	0	0	0	0	0	0	0	0	0	0	0	0	0	1
683	17	1	A only	0	1	0	1	0	0	0	0	0	0	0	0	0	0	0	0	0	1
684	17	1	A only	0	0	0	0	0	0	0	0	0	0	0	0	0	0	0	1	1	1
685	17	1	A only	0	0	0	0	0	0	0	0	0	0	0	0	0	0	0	0	0	0
686	17	2	A only	1	0	0	1	0	0	0	0	0	0	0	0	0	0	0	0	0	1
687	17	2	A only	1	0	0	1	0	0	0	0	0	0	0	0	0	0	0	0	0	1
688	17	2	A only	1	0	0	1	0	0	0	0	0	0	0	0	0	0	0	0	0	1
689	17	2	A only	1	0	0	1	0	0	0	0	0	0	0	0	0	0	0	0	0	1
690	17	2	A only	0	1	0	1	0	0	0	0	0	0	0	0	0	0	0	0	0	1
691	17	2	A only	0	1	0	1	0	0	0	0	0	0	0	0	0	0	0	0	0	1
692	17	2	A only	0	1	0	1	0	0	0	0	0	0	0	0	0	0	0	0	0	1
693	17	2	A only	0	1	0	1	0	0	0	0	0	0	0	0	0	0	0	0	0	1
694	17	2	A only	0	1	0	1	0	0	0	0	0	0	0	0	0	0	0	0	0	1
695	17	2	A only	0	1	0	1	0	0	0	0	0	0	0	0	0	0	0	0	0	1
696	17	2	A only	0	0	0	0	0	0	0	0	0	0	0	0	0	0	0	0	0	0
697	17	3	A only	0	1	0	1	0	0	0	0	0	0	0	0	0	0	0	0	0	1
698	17	3	A only	0	1	0	1	0	0	0	0	0	0	0	0	0	0	0	0	0	1
699	17	3	A only	0	1	0	1	0	0	0	0	0	0	0	0	0	0	0	0	0	1
700	17	3	A only	0	1	0	1	0	0	0	0	0	0	0	0	0	0	0	0	0	1
701	17	3	A only	0	0	0	0	0	0	0	0	1	0	0	0	0	0	0	0	1	1
702	17	3	A only	0	1	0	1	0	0	0	0	0	0	0	0	0	0	0	0	0	1
703	17	3	A only	0	1	0	1	0	0	0	0	0	0	0	0	0	0	0	0	0	1
704	17	3	A only	0	1	0	1	0	0	0	0	0	0	0	0	0	0	0	0	0	1
705	17	3	A only	0	1	0	1	0	0	0	0	0	0	0	0	0	0	0	0	0	1
706	17	3	A only	0	0	0	0	0	0	0	0	0	1	0	0	0	0	0	0	1	1
707	17	4	A only	1	0	0	1	0	0	0	0	0	0	0	0	0	0	0	0	0	1
708	17	4	A only	0	1	0	1	0	0	0	0	0	0	0	0	0	0	0	0	0	1
709	17	4	A only	0	0	0	0	0	0	0	1	0	0	0	0	0	0	0	0	1	1
710	17	4	A only	1	0	0	1	0	0	0	0	0	0	0	0	0	0	0	0	0	1
711	17	4	A only	0	0	0	0	0	0	0	0	0	0	0	0	0	0	0	0	0	0
712	17	5	A only	0	0	0	0	0	0	0	0	0	0	0	0	0	0	0	0	0	0
713	17	6	A only	1	0	0	1	0	0	0	0	0	0	0	0	0	0	0	0	0	1
714	17	6	A only	1	0	0	1	0	0	0	0	0	0	0	0	0	0	0	0	0	1
715	17	6	A only	0	1	0	1	0	0	0	0	0	0	0	0	0	0	0	0	0	1
716	17	6	A only	0	1	0	1	0	0	0	0	0	0	0	0	0	0	0	0	0	1
717	17	6	A only	0	1	0	1	0	0	0	0	0	0	0	0	0	0	0	0	0	1
718	17	6	A only	0	1	0	1	0	0	0	0	0	0	0	0	0	0	0	0	0	1
719	17	6	A only	0	1	0	1	0	0	0	0	0	0	0	0	0	0	0	0	0	1
720	17	6	A only	0	1	0	1	0	0	0	0	0	0	0	0	0	0	0	0	0	1
721	17	6	A only	0	1	0	1	0	0	0	0	0	0	0	0	0	0	0	0	0	1
722	17	6	A only	0	1	0	1	0	0	0	0	0	0	0	0	0	0	0	0	0	1
723	17	7	A only	1	0	0	1	0	0	0	0	0	0	0	0	0	0	0	0	0	1
724	17	7	A only	0	1	0	1	0	0	0	0	0	0	0	0	0	0	0	0	0	1
725	17	7	A only	0	1	0	1	0	0	0	0	0	0	0	0	0	0	0	0	0	1
726	17	7	A only	0	1	0	1	0	0	0	0	0	0	0	0	0	0	0	0	0	1
727	17	7	A only	0	1	0	1	0	0	0	0	0	0	0	0	0	0	0	0	0	1
728	17	7	A only	0	1	0	1	0	0	0	0	0	0	0	0	0	0	0	0	0	1
729	17	7	A only	0	1	0	1	0	0	0	0	0	0	0	0	0	0	0	0	0	1
730	17	8	A only	0	0	0	0	0	0	0	0	0	0	0	0	0	0	0	0	0	0
731	17	9	A only	0	0	0	0	0	0	0	0	0	0	0	0	0	0	0	0	0	0
732	17	10	A only	0	1	0	1	0	0	0	0	0	0	0	0	0	0	0	0	0	1
733	17	10	A only	0	0	0	0	0	0	0	0	0	0	0	0	0	0	0	0	0	0
734	17	11	A only	1	0	0	1	0	0	0	0	0	0	0	0	0	0	0	0	0	1
735	17	11	A only	0	0	0	0	0	0	0	1	0	0	0	0	0	0	0	0	1	1
736	17	11	A only	0	0	0	0	0	0	0	0	0	0	0	0	0	0	0	0	0	0
737	17	12	A only	1	0	0	1	0	0	0	0	0	0	0	0	0	0	0	0	0	1
738	17	12	A only	0	0	0	0	0	0	0	0	0	0	0	0	0	0	0	0	0	0
739	16	1	A only	0	0	0	0	0	0	0	0	0	0	0	0	0	0	0	0	0	0
740	16	2	A only	0	0	0	0	0	0	0	0	0	0	0	0	0	0	0	0	0	0
741	16	3	A only	1	0	0	1	0	0	0	0	0	0	0	0	0	0	0	0	0	1
742	16	3	A only	1	0	0	1	0	0	0	0	0	0	0	0	0	0	0	0	0	1
743	16	3	A only	0	1	0	1	0	0	0	0	0	0	0	0	0	0	0	0	0	1
744	16	3	A only	0	1	0	1	0	0	0	0	0	0	0	0	0	0	0	0	0	1
745	16	3	A only	0	1	0	1	0	0	0	0	0	0	0	0	0	0	0	0	0	1
746	16	3	A only	0	1	0	1	0	0	0	0	0	0	0	0	0	0	0	0	0	1
747	16	3	A only	0	1	0	1	0	0	0	0	0	0	0	0	0	0	0	0	0	1
748	16	3	A only	0	1	0	1	0	0	0	0	0	0	0	0	0	0	0	0	0	1
749	16	4	A only	0	0	0	0	0	0	0	0	0	0	0	0	0	0	0	0	0	0
750	16	5	A only	1	0	0	1	0	0	0	0	0	0	0	0	0	0	0	0	0	1
751	16	5	A only	0	1	0	1	0	0	0	0	0	0	0	0	0	0	0	0	0	1
752	16	5	A only	0	1	0	1	0	0	0	0	0	0	0	0	0	0	0	0	0	1
753	16	5	A only	0	1	0	1	0	0	0	0	0	0	0	0	0	0	0	0	0	1
754	16	5	A only	0	1	0	1	0	0	0	0	0	0	0	0	0	0	0	0	0	1
755	16	5	A only	0	1	0	1	0	0	0	0	0	0	0	0	0	0	0	0	0	1
756	16	5	A only	0	1	0	1	0	0	0	0	0	0	0	0	0	0	0	0	0	1
757	16	5	A only	0	1	0	1	0	0	0	0	0	0	0	0	0	0	0	0	0	1
758	16	5	A only	0	1	0	1	0	0	0	0	0	0	0	0	0	0	0	0	0	1
759	16	5	A only	0	1	0	1	0	0	0	0	0	0	0	0	0	0	0	0	0	1
760	16	6	A only	1	0	0	1	0	0	0	0	0	0	0	0	0	0	0	0	0	1
761	16	6	A only	1	0	0	1	0	0	0	0	0	0	0	0	0	0	0	0	0	1
762	16	6	A only	0	0	0	0	0	0	0	1	0	0	0	0	0	0	0	0	1	1
763	16	6	A only	1	0	0	1	0	0	0	0	0	0	0	0	0	0	0	0	0	1
764	16	6	A only	0	1	0	1	0	0	0	0	0	0	0	0	0	0	0	0	0	1
765	16	6	A only	0	0	0	0	0	0	0	0	0	0	0	0	0	0	0	0	0	0
766	16	7	A only	1	0	0	1	0	0	0	0	0	0	0	0	0	0	0	0	0	1
767	16	7	A only	1	0	0	1	0	0	0	0	0	0	0	0	0	0	0	0	0	1
768	16	7	A only	0	1	0	1	0	0	0	0	0	0	0	0	0	0	0	0	0	1
769	16	7	A only	0	1	0	1	0	0	0	0	0	0	0	0	0	0	0	0	0	1
770	16	7	A only	0	1	0	1	0	0	0	0	0	0	0	0	0	0	0	0	0	1
771	16	7	A only	0	1	0	1	0	0	0	0	0	0	0	0	0	0	0	0	0	1
772	16	7	A only	0	1	0	1	0	0	0	0	0	0	0	0	0	0	0	0	0	1
773	16	7	A only	0	0	0	0	0	0	0	0	0	0	1	0	1	0	0	0	1	1
774	16	7	A only	0	1	0	1	0	0	0	0	0	0	0	0	0	0	0	0	0	1
775	16	8	A only	1	0	0	1	0	0	0	0	0	0	0	0	0	0	0	0	0	1
776	16	8	A only	0	1	0	1	0	0	0	0	0	0	0	0	0	0	0	0	0	1
777	16	8	A only	0	1	0	1	0	0	0	0	0	0	0	0	0	0	0	0	0	1
778	16	8	A only	0	1	0	1	0	0	0	0	0	0	0	0	0	0	0	0	0	1
779	16	8	A only	0	1	0	1	0	0	0	0	0	0	0	0	0	0	0	0	0	1
780	16	8	A only	0	1	0	1	0	0	0	0	0	0	0	0	0	0	0	0	0	1
781	16	8	A only	0	1	0	1	0	0	0	0	0	0	0	0	0	0	0	0	0	1
782	16	8	A only	0	1	0	1	0	0	0	0	0	0	0	0	0	0	0	0	0	1
783	16	9	A only	1	0	0	1	0	0	0	0	0	0	0	0	0	0	0	0	0	1
784	16	9	A only	1	0	0	1	0	0	0	0	0	0	0	0	0	0	0	0	0	1
785	16	9	A only	0	0	0	0	0	0	0	0	0	0	0	0	0	0	0	0	0	0
786	16	9	A only	0	0	0	0	0	0	0	0	0	0	0	0	0	0	0	0	0	0
787	16	9	A only	0	0	0	0	0	0	0	0	0	0	0	0	0	0	0	0	0	0
788	16	10	A only	1	0	0	1	0	0	0	0	0	0	0	0	0	0	0	0	0	1
789	16	10	A only	1	0	0	1	0	0	0	0	0	0	0	0	0	0	0	0	0	1
790	16	10	A only	1	0	0	1	0	0	0	0	0	0	0	0	0	0	0	0	0	1
791	16	10	A only	1	0	0	1	0	0	0	0	0	0	0	0	0	0	0	0	0	1
792	16	10	A only	1	0	0	1	0	0	0	0	0	0	0	0	0	0	0	0	0	1
793	16	10	A only	0	1	0	1	0	0	0	0	0	0	0	0	0	0	0	0	0	1
794	16	10	A only	0	1	0	1	0	0	0	0	0	0	0	0	0	0	0	0	0	1
795	16	10	A only	0	1	0	1	0	0	0	0	0	0	0	0	0	0	0	0	0	1
796	16	10	A only	0	1	0	1	0	0	0	0	0	0	0	0	0	0	0	0	0	1
797	16	10	A only	0	0	0	0	0	0	0	1	0	0	0	0	0	0	0	0	1	1
798	16	10	A only	0	0	0	0	0	0	0	1	0	0	0	0	0	0	0	0	1	1
799	16	11	A only	1	0	0	1	0	0	0	0	0	0	0	0	0	0	0	0	0	1
800	16	11	A only	1	0	0	1	0	0	0	0	0	0	0	0	0	0	0	0	0	1
801	16	11	A only	1	0	0	1	0	0	0	0	0	0	0	0	0	0	0	0	0	1
802	16	11	A only	0	1	0	1	0	0	0	0	0	0	0	0	0	0	0	0	0	1
803	16	11	A only	0	1	0	1	0	0	0	0	0	0	0	0	0	0	0	0	0	1
804	16	11	A only	0	1	0	1	0	0	0	0	0	0	0	0	0	0	0	0	0	1
805	16	11	A only	0	1	0	1	0	0	0	0	0	0	0	0	0	0	0	0	0	1
806	16	11	A only	0	1	0	1	0	0	0	0	0	0	0	0	0	0	0	0	0	1
807	16	11	A only	0	1	0	1	0	0	0	0	0	0	0	0	0	0	0	0	0	1
808	16	11	A only	0	1	0	1	0	0	0	0	0	0	0	0	0	0	0	0	0	1
809	16	11	A only	0	1	0	1	0	0	0	0	0	0	0	0	0	0	0	0	0	1
810	16	12	A only	0	1	0	1	0	0	0	0	0	0	0	0	0	0	0	0	0	1
811	16	12	A only	0	1	0	1	0	0	0	0	0	0	0	0	0	0	0	0	0	1
812	16	12	A only	0	1	0	1	0	0	0	0	0	0	0	0	0	0	0	0	0	1
813	16	12	A only	0	1	0	1	0	0	0	0	0	0	0	0	0	0	0	0	0	1
814	16	12	A only	0	0	0	0	0	0	0	0	0	0	0	0	0	0	0	1	1	1
815	16	12	A only	0	1	0	1	0	0	0	0	0	0	0	0	0	0	0	0	0	1
816	16	12	A only	0	1	0	1	0	0	0	0	0	0	0	0	0	0	0	0	0	1
817	16	12	A only	0	1	0	1	0	0	0	0	0	0	0	0	0	0	0	0	0	1
818	16	12	A only	0	1	0	1	0	0	0	0	0	0	0	0	0	0	0	0	0	1
819	16	13	A only	0	1	0	1	0	0	0	0	0	0	0	0	0	0	0	0	0	1
820	16	13	A only	0	0	0	0	0	0	0	0	0	1	0	0	0	0	0	0	1	1
821	16	13	A only	0	1	0	1	0	0	0	0	0	0	0	0	0	0	0	0	0	1
822	16	13	A only	0	0	0	0	0	0	0	0	1	0	0	0	0	0	0	0	1	1
823	16	13	A only	0	0	0	0	0	0	0	0	1	0	0	0	0	0	0	0	1	1
824	16	13	A only	0	1	0	1	0	0	0	0	0	0	0	0	0	0	0	0	0	1
825	16	13	A only	0	0	0	0	0	0	0	0	0	0	0	0	0	0	0	0	0	0
826	16	14	A only	0	0	0	0	0	0	0	0	0	0	0	0	0	0	0	0	0	0
827	16	15	A only	0	0	0	0	0	0	0	0	0	0	0	0	0	0	0	0	0	0
828	15	1	WF only	0	0	0	0	0	0	0	0	0	0	0	0	0	0	0	0	0	0
829	15	2	WF only	1	0	0	1	0	0	0	0	0	0	0	0	0	0	0	0	0	1
830	15	2	WF only	0	0	0	0	0	0	0	0	1	0	0	0	0	0	0	0	1	1
831	15	2	WF only	0	1	0	1	0	0	0	0	0	0	0	0	0	0	0	0	0	1
832	15	2	WF only	0	0	0	0	0	0	0	1	0	0	0	0	0	0	0	0	1	1
833	15	3	WF only	0	0	0	0	0	0	0	0	0	0	0	0	0	0	0	0	0	0
834	15	4	WF only	1	0	0	1	0	0	0	0	0	0	0	0	0	0	0	0	0	1
835	15	4	WF only	1	0	0	1	0	0	0	0	0	0	0	0	0	0	0	0	0	1
836	15	4	WF only	0	1	0	1	0	0	0	0	0	0	0	0	0	0	0	0	0	1
837	15	4	WF only	0	1	0	1	0	0	0	0	0	0	0	0	0	0	0	0	0	1
838	15	4	WF only	0	1	0	1	0	0	0	0	0	0	0	0	0	0	0	0	0	1
839	15	4	WF only	0	1	0	1	0	0	0	0	0	0	0	0	0	0	0	0	0	1
840	15	4	WF only	0	1	0	1	0	0	0	0	0	0	0	0	0	0	0	0	0	1
841	15	4	WF only	0	1	0	1	0	0	0	0	0	0	0	0	0	0	0	0	0	1
842	15	4	WF only	0	1	0	1	0	0	0	0	0	0	0	0	0	0	0	0	0	1
843	15	4	WF only	0	0	0	0	0	0	0	1	0	0	0	0	0	0	0	0	1	1
844	15	5	WF only	0	0	0	0	0	0	1	0	0	0	0	0	0	0	0	0	1	1
845	15	6	WF only	0	1	0	1	0	0	0	0	0	0	0	0	0	0	0	0	0	1
846	15	6	WF only	0	1	0	1	0	0	0	0	0	0	0	0	0	0	0	0	0	1
847	15	6	WF only	0	1	0	1	0	0	0	0	0	0	0	0	0	0	0	0	0	1
848	15	6	WF only	0	1	0	1	0	0	0	0	0	0	0	0	0	0	0	0	0	1
849	15	6	WF only	0	0	0	0	0	0	0	0	1	0	0	0	0	0	0	0	1	1
850	15	6	WF only	0	1	0	1	0	0	0	0	0	0	0	0	0	0	0	0	0	1
851	15	6	WF only	0	1	0	1	0	0	0	0	0	0	0	0	0	0	0	0	0	1
852	15	6	WF only	0	1	0	1	0	0	0	0	0	0	0	0	0	0	0	0	0	1
853	15	7	WF only	1	0	0	1	0	0	0	0	0	0	0	0	0	0	0	0	0	1
854	15	7	WF only	0	1	0	1	0	0	0	0	0	0	0	0	0	0	0	0	0	1
855	15	7	WF only	0	1	0	1	0	0	0	0	0	0	0	0	0	0	0	0	0	1
856	15	7	WF only	0	0	0	0	0	0	0	1	0	0	0	0	0	0	0	0	1	1
857	15	7	WF only	0	0	0	0	0	0	0	0	0	0	0	0	0	0	0	0	0	0
858	15	8	WF only	0	0	0	0	0	0	0	0	0	0	0	0	0	0	0	0	0	0
859	15	9	WF only	0	1	0	1	0	0	0	0	0	0	0	0	0	0	0	0	0	1
860	15	9	WF only	0	0	0	0	0	0	0	0	1	0	0	0	0	0	0	0	1	1
861	15	9	WF only	0	1	0	1	0	0	0	0	0	0	0	0	0	0	0	0	0	1
862	15	9	WF only	0	1	0	1	0	0	0	0	0	0	0	0	0	0	0	0	0	1
863	15	9	WF only	0	1	0	1	0	0	0	0	0	0	0	0	0	0	0	0	0	1
864	15	9	WF only	0	1	0	1	0	0	0	0	0	0	0	0	0	0	0	0	0	1
865	15	9	WF only	0	1	0	1	0	0	0	0	0	0	0	0	0	0	0	0	0	1
866	15	9	WF only	0	0	0	0	0	0	0	1	0	0	0	0	0	0	0	0	1	1
867	15	9	WF only	0	0	0	0	0	0	0	0	0	1	0	0	0	0	0	0	1	1
868	15	10	WF only	0	0	0	0	0	0	0	0	0	0	0	0	0	0	0	0	0	0
869	15	11	WF only	0	0	0	0	0	0	0	0	0	0	0	0	0	0	0	0	0	0
870	15	12	WF only	0	0	0	0	0	0	0	0	0	0	0	0	0	0	0	0	0	0
871	15	12	WF only	1	0	0	1	0	0	0	0	0	0	0	0	0	0	0	0	0	1
872	15	12	WF only	0	0	0	0	0	0	0	1	0	0	0	0	0	0	0	0	1	1
873	15	12	WF only	0	0	0	0	0	0	0	0	0	0	0	0	0	0	0	0	0	0
874	15	13	WF only	0	0	0	0	0	0	0	0	0	1	0	0	0	0	0	0	1	1
875	15	13	WF only	0	1	0	1	0	0	0	0	0	0	0	0	0	0	0	0	0	1
876	15	13	WF only	1	0	0	1	0	0	0	0	0	0	0	0	0	0	0	0	0	1
877	15	13	WF only	1	0	0	1	0	0	0	0	0	0	0	0	0	0	0	0	0	1
878	15	13	WF only	0	1	0	1	0	0	0	0	0	0	0	0	0	0	0	0	0	1
879	15	13	WF only	0	1	0	1	0	0	0	0	0	0	0	0	0	0	0	0	0	1
880	15	13	WF only	0	1	0	1	0	0	0	0	0	0	0	0	0	0	0	0	0	1
881	15	13	WF only	0	0	0	0	0	0	0	1	0	0	0	0	0	0	0	0	1	1
882	15	14	WF only	1	0	0	1	0	0	0	0	0	0	0	0	0	0	0	0	0	1
883	15	14	WF only	1	0	0	1	0	0	0	0	0	0	0	0	0	0	0	0	0	1
884	15	14	WF only	1	0	0	1	0	0	0	0	0	0	0	0	0	0	0	0	0	1
885	15	14	WF only	0	1	0	1	0	0	0	0	0	0	0	0	0	0	0	0	0	1
886	15	14	WF only	0	0	0	0	0	0	0	0	0	0	1	0	1	0	0	0	1	1
887	15	14	WF only	0	1	0	1	0	0	0	0	0	0	0	0	0	0	0	0	0	1
888	15	14	WF only	0	1	0	1	0	0	0	0	0	0	0	0	0	0	0	0	0	1
889	15	14	WF only	0	1	0	1	0	0	0	0	0	0	0	0	0	0	0	0	0	1
890	15	14	WF only	0	1	0	1	0	0	0	0	0	0	0	0	0	0	0	0	0	1
891	15	15	WF only	0	0	0	0	0	0	0	0	0	0	0	0	0	0	0	0	0	0
892	15	16	WF only	0	1	0	1	0	0	0	0	0	0	0	0	0	0	0	0	0	1
893	15	16	WF only	0	1	0	1	0	0	0	0	0	0	0	0	0	0	0	0	0	1
894	15	16	WF only	0	1	0	1	0	0	0	0	0	0	0	0	0	0	0	0	0	1
895	15	16	WF only	0	0	0	0	0	0	0	0	0	0	0	0	0	0	0	0	0	0
896	15	17	WF only	0	0	0	0	0	0	0	0	0	0	0	0	0	0	0	0	0	0
897	15	18	WF only	1	0	0	1	0	0	0	0	0	0	0	0	0	0	0	0	0	1
898	15	18	WF only	0	0	0	0	0	0	0	0	1	0	0	0	0	0	0	0	1	1
899	15	19	WF only	1	0	0	1	0	0	0	0	0	0	0	0	0	0	0	0	0	1
900	15	19	WF only	0	0	0	0	0	0	0	0	0	0	0	0	0	0	0	0	0	0
901	15	19	WF only	0	1	0	1	0	0	0	0	0	0	0	0	0	0	0	0	0	1
902	15	20	WF only	0	0	0	0	0	0	0	0	0	0	0	0	0	0	0	0	0	0
903	15	21	WF only	0	0	0	0	0	0	0	1	0	0	0	0	0	0	0	0	1	1
904	15	21	WF only	0	0	0	0	0	0	0	0	0	0	0	0	0	0	0	0	0	0
905	15	22	WF only	0	0	0	0	0	0	0	0	0	0	0	0	0	0	0	0	0	0
906	15	22	WF only	0	0	0	0	0	0	0	0	0	0	0	0	0	0	0	0	0	0
907	15	23	WF only	0	0	0	0	0	0	0	0	0	0	0	0	0	0	0	0	0	0
908	15	24	WF only	0	0	0	0	0	0	0	0	0	0	0	0	0	0	0	0	0	0
909	15	25	WF only	0	0	0	0	0	0	0	0	0	0	0	0	0	0	0	0	0	0
910	15	26	WF only	0	0	0	0	0	0	0	0	0	0	0	0	0	0	0	0	0	0
911	15	26	WF only	1	0	0	1	0	0	0	0	0	0	0	0	0	0	0	0	0	1
912	15	26	WF only	0	0	0	0	0	0	0	0	0	0	0	0	0	0	0	0	0	0
913	15	27	WF only	1	0	0	1	0	0	0	0	0	0	0	0	0	0	0	0	0	1
914	15	27	WF only	0	1	0	1	0	0	0	0	0	0	0	0	0	0	0	0	0	1
915	15	27	WF only	0	1	0	1	0	0	0	0	0	0	0	0	0	0	0	0	0	1
916	15	27	WF only	0	1	0	1	0	0	0	0	0	0	0	0	0	0	0	0	0	1
917	15	27	WF only	0	1	0	1	0	0	0	0	0	0	0	0	0	0	0	0	0	1
918	15	27	WF only	0	1	0	1	0	0	0	0	0	0	0	0	0	0	0	0	0	1
919	14	1	A + WF	0	0	0	0	0	0	0	0	0	1	0	0	0	0	0	0	1	1
920	14	2	A + WF	0	0	0	0	0	0	0	0	0	0	0	1	1	0	0	0	1	1
921	14	2	A + WF	0	1	0	1	0	0	0	0	0	0	0	0	0	0	0	0	0	1
922	14	2	A + WF	0	0	0	0	0	0	0	1	0	0	0	0	0	0	0	0	1	1
923	14	2	A + WF	0	0	0	0	0	0	0	0	1	0	0	0	0	0	0	0	1	1
924	14	2	A + WF	0	1	0	1	0	0	0	0	0	0	0	0	0	0	0	0	0	1
925	14	2	A + WF	0	1	0	1	0	0	0	0	0	0	0	0	0	0	0	0	0	1
926	14	2	A + WF	0	1	0	1	0	0	0	0	0	0	0	0	0	0	0	0	0	1
927	14	2	A + WF	0	0	0	0	0	0	0	0	0	0	0	0	0	0	0	0	0	0
928	14	3	A + WF	0	0	0	0	0	0	0	0	1	0	0	0	0	0	0	0	1	1
929	14	3	A + WF	0	1	0	1	0	0	0	0	0	0	0	0	0	0	0	0	0	1
930	14	3	A + WF	0	1	0	1	0	0	0	0	0	0	0	0	0	0	0	0	0	1
931	14	3	A + WF	0	1	0	1	0	0	0	0	0	0	0	0	0	0	0	0	0	1
932	14	3	A + WF	0	0	0	0	0	0	0	0	1	0	0	0	0	0	0	0	1	1
933	14	3	A + WF	0	1	0	1	0	0	0	0	0	0	0	0	0	0	0	0	0	1
934	14	3	A + WF	0	1	0	1	0	0	0	0	0	0	0	0	0	0	0	0	0	1
935	14	3	A + WF	0	1	0	1	0	0	0	0	0	0	0	0	0	0	0	0	0	1
936	14	3	A + WF	0	1	0	1	0	0	0	0	0	0	0	0	0	0	0	0	0	1
937	14	3	A + WF	0	1	0	1	0	0	0	0	0	0	0	0	0	0	0	0	0	1
938	14	4	A + WF	0	0	0	0	0	0	0	0	0	0	0	0	0	0	0	1	1	1
939	14	4	A + WF	0	1	0	1	0	0	0	0	0	0	0	0	0	0	0	0	0	1
940	14	4	A + WF	0	1	0	1	0	0	0	0	0	0	0	0	0	0	0	0	0	1
941	14	4	A + WF	0	1	0	1	0	0	0	0	0	0	0	0	0	0	0	0	0	1
942	14	4	A + WF	0	1	0	1	0	0	0	0	0	0	0	0	0	0	0	0	0	1
943	14	4	A + WF	0	0	0	0	0	0	0	1	0	0	0	0	0	0	0	0	1	1
944	14	4	A + WF	0	0	0	0	0	0	0	0	1	0	0	0	0	0	0	0	1	1
945	14	4	A + WF	0	1	0	1	0	0	0	0	0	0	0	0	0	0	0	0	0	1
946	14	4	A + WF	0	0	0	0	0	0	0	1	0	0	0	0	0	0	0	0	1	1
947	14	4	A + WF	0	1	0	1	0	0	0	0	0	0	0	0	0	0	0	0	0	1
948	14	5	A + WF	0	1	0	1	0	0	0	0	0	0	0	0	0	0	0	0	0	1
949	14	5	A + WF	0	1	0	1	0	0	0	0	0	0	0	0	0	0	0	0	0	1
950	14	5	A + WF	0	1	0	1	0	0	0	0	0	0	0	0	0	0	0	0	0	1
951	14	5	A + WF	0	1	0	1	0	0	0	0	0	0	0	0	0	0	0	0	0	1
952	14	5	A + WF	0	0	0	0	0	0	0	0	0	0	0	0	0	0	0	0	0	0
953	14	6	A + WF	0	0	0	0	0	0	0	0	0	0	0	0	0	0	0	0	0	0
954	14	7	A + WF	0	0	0	0	0	0	0	0	0	1	0	0	0	0	0	0	1	1
955	14	7	A + WF	1	0	0	1	0	0	0	0	0	0	0	0	0	0	0	0	0	1
956	14	7	A + WF	0	0	0	0	0	0	0	0	0	0	1	0	1	0	0	0	1	1
957	14	7	A + WF	0	1	0	1	0	0	0	0	0	0	0	0	0	0	0	0	0	1
958	14	7	A + WF	0	1	0	1	0	0	0	0	0	0	0	0	0	0	0	0	0	1
959	14	7	A + WF	0	0	0	0	0	0	0	0	0	1	0	0	0	0	0	0	1	1
960	14	7	A + WF	0	1	0	1	0	0	0	0	0	0	0	0	0	0	0	0	0	1
961	14	7	A + WF	0	1	0	1	0	0	0	0	0	0	0	0	0	0	0	0	0	1
962	14	7	A + WF	0	1	0	1	0	0	0	0	0	0	0	0	0	0	0	0	0	1
963	14	7	A + WF	0	1	0	1	0	0	0	0	0	0	0	0	0	0	0	0	0	1
964	14	7	A + WF	0	1	0	1	0	0	0	0	0	0	0	0	0	0	0	0	0	1
965	14	8	A + WF	1	0	0	1	0	0	0	0	0	0	0	0	0	0	0	0	0	1
966	14	8	A + WF	0	0	0	0	0	0	0	0	1	0	0	0	0	0	0	0	1	1
967	14	8	A + WF	0	1	0	1	0	0	0	0	0	0	0	0	0	0	0	0	0	1
968	14	8	A + WF	0	1	0	1	0	0	0	0	0	0	0	0	0	0	0	0	0	1
969	14	8	A + WF	0	1	0	1	0	0	0	0	0	0	0	0	0	0	0	0	0	1
970	14	8	A + WF	0	1	0	1	0	0	0	0	0	0	0	0	0	0	0	0	0	1
971	14	8	A + WF	0	1	0	1	0	0	0	0	0	0	0	0	0	0	0	0	0	1
972	14	8	A + WF	0	0	0	0	0	0	0	1	0	0	0	0	0	0	0	0	1	1
973	14	8	A + WF	0	0	0	0	0	0	0	1	0	0	0	0	0	0	0	0	1	1
974	14	8	A + WF	0	0	0	0	0	0	0	1	0	0	0	0	0	0	0	0	1	1
975	14	9	A + WF	0	0	0	0	1	0	0	0	0	0	0	0	0	0	0	0	1	1
976	14	9	A + WF	1	0	0	1	0	0	0	0	0	0	0	0	0	0	0	0	0	1
977	14	9	A + WF	0	1	0	1	0	0	0	0	0	0	0	0	0	0	0	0	0	1
978	14	9	A + WF	0	0	0	0	0	0	0	1	0	0	0	0	0	0	0	0	1	1
979	14	9	A + WF	0	0	0	0	0	0	0	1	0	0	0	0	0	0	0	0	1	1
980	14	10	A + WF	0	0	0	0	0	0	0	1	0	0	0	0	0	0	0	0	1	1
981	14	10	A + WF	0	0	0	0	1	0	0	0	0	0	0	0	0	0	0	0	1	1
982	14	10	A + WF	1	0	0	1	0	0	0	0	0	0	0	0	0	0	0	0	0	1
983	14	10	A + WF	1	0	0	1	0	0	0	0	0	0	0	0	0	0	0	0	0	1
984	14	10	A + WF	0	1	0	1	0	0	0	0	0	0	0	0	0	0	0	0	0	1
985	14	10	A + WF	0	0	0	0	0	0	0	0	0	1	0	0	0	0	0	0	1	1
986	14	10	A + WF	0	0	0	0	0	0	0	0	1	0	0	0	0	0	0	0	1	1
987	14	10	A + WF	0	0	0	0	0	0	0	0	1	0	0	0	0	0	0	0	1	1
988	14	10	A + WF	0	0	0	0	0	0	0	0	0	0	0	0	0	0	0	0	0	0
989	14	11	A + WF	1	0	0	1	0	0	0	0	0	0	0	0	0	0	0	0	0	1
990	14	11	A + WF	0	0	0	0	0	0	0	0	0	0	0	0	0	0	0	0	0	0
991	14	12	A + WF	0	0	0	0	0	0	0	0	0	0	1	0	1	0	0	0	1	1
992	14	12	A + WF	0	0	0	0	0	0	0	0	0	0	0	0	0	0	0	0	0	0
993	14	13	A + WF	0	0	0	0	0	0	0	1	0	0	0	0	0	0	0	0	1	1
994	14	13	A + WF	0	1	0	1	0	0	0	0	0	0	0	0	0	0	0	0	0	1
995	14	13	A + WF	0	1	0	1	0	0	0	0	0	0	0	0	0	0	0	0	0	1
996	14	13	A + WF	0	0	0	0	0	0	0	0	0	0	0	0	0	0	0	0	0	0
997	14	14	A + WF	0	0	0	0	1	0	0	0	0	0	0	0	0	0	0	0	1	1
998	14	14	A + WF	1	0	0	1	0	0	0	0	0	0	0	0	0	0	0	0	0	1
999	14	14	A + WF	1	0	0	1	0	0	0	0	0	0	0	0	0	0	0	0	0	1
1000	14	14	A + WF	1	0	0	1	0	0	0	0	0	0	0	0	0	0	0	0	0	1
1001	14	14	A + WF	0	0	0	0	0	0	0	0	1	0	0	0	0	0	0	0	1	1
1002	14	14	A + WF	0	1	0	1	0	0	0	0	0	0	0	0	0	0	0	0	0	1
1003	14	14	A + WF	0	0	0	0	0	0	0	0	1	0	0	0	0	0	0	0	1	1
1004	14	14	A + WF	0	0	0	0	0	0	0	0	1	0	0	0	0	0	0	0	1	1
1005	14	14	A + WF	0	0	0	0	0	0	0	0	0	0	1	0	1	0	0	0	1	1
1006	14	14	A + WF	0	1	0	1	0	0	0	0	0	0	0	0	0	0	0	0	0	1
1007	14	14	A + WF	0	0	0	0	0	0	0	1	0	0	0	0	0	0	0	0	1	1
1008	14	15	A + WF	1	0	0	1	0	0	0	0	0	0	0	0	0	0	0	0	0	1
1009	14	15	A + WF	0	0	0	0	0	0	0	1	0	0	0	0	0	0	0	0	1	1
1010	14	15	A + WF	1	0	0	1	0	0	0	0	0	0	0	0	0	0	0	0	0	1
1011	14	15	A + WF	0	1	0	1	0	0	0	0	0	0	0	0	0	0	0	0	0	1
1012	14	15	A + WF	0	1	0	1	0	0	0	0	0	0	0	0	0	0	0	0	0	1
1013	14	15	A + WF	0	1	0	1	0	0	0	0	0	0	0	0	0	0	0	0	0	1
1014	14	15	A + WF	0	0	0	0	0	0	0	0	0	1	0	0	0	0	0	0	1	1
1015	14	15	A + WF	0	1	0	1	0	0	0	0	0	0	0	0	0	0	0	0	0	1
1016	14	15	A + WF	0	1	0	1	0	0	0	0	0	0	0	0	0	0	0	0	0	1
1017	14	15	A + WF	0	1	0	1	0	0	0	0	0	0	0	0	0	0	0	0	0	1
1018	14	16	A + WF	1	0	0	1	0	0	0	0	0	0	0	0	0	0	0	0	0	1
1019	14	16	A + WF	1	0	0	1	0	0	0	0	0	0	0	0	0	0	0	0	0	1
1020	14	16	A + WF	1	0	0	1	0	0	0	0	0	0	0	0	0	0	0	0	0	1
1021	14	16	A + WF	1	0	0	1	0	0	0	0	0	0	0	0	0	0	0	0	0	1
1022	14	16	A + WF	1	0	0	1	0	0	0	0	0	0	0	0	0	0	0	0	0	1
1023	14	16	A + WF	0	1	0	1	0	0	0	0	0	0	0	0	0	0	0	0	0	1
1024	14	16	A + WF	0	1	0	1	0	0	0	0	0	0	0	0	0	0	0	0	0	1
1025	14	16	A + WF	0	0	0	0	0	0	0	0	0	0	0	0	0	0	0	1	1	1
1026	14	16	A + WF	0	1	0	1	0	0	0	0	0	0	0	0	0	0	0	0	0	1
1027	14	16	A + WF	0	1	0	1	0	0	0	0	0	0	0	0	0	0	0	0	0	1
1028	14	17	A + WF	0	0	0	0	0	0	0	0	0	0	0	0	0	0	0	0	0	0
1029	14	17	A + WF	1	0	0	1	0	0	0	0	0	0	0	0	0	0	0	0	0	1
1030	14	17	A + WF	0	1	0	1	0	0	0	0	0	0	0	0	0	0	0	0	0	1
1031	14	17	A + WF	0	1	0	1	0	0	0	0	0	0	0	0	0	0	0	0	0	1
1032	14	17	A + WF	0	1	0	1	0	0	0	0	0	0	0	0	0	0	0	0	0	1
1033	14	17	A + WF	0	1	0	1	0	0	0	0	0	0	0	0	0	0	0	0	0	1
1034	14	17	A + WF	0	1	0	1	0	0	0	0	0	0	0	0	0	0	0	0	0	1
1035	14	17	A + WF	0	1	0	1	0	0	0	0	0	0	0	0	0	0	0	0	0	1
1036	14	17	A + WF	0	1	0	1	0	0	0	0	0	0	0	0	0	0	0	0	0	1
1037	14	17	A + WF	0	1	0	1	0	0	0	0	0	0	0	0	0	0	0	0	0	1
1038	14	18	A + WF	0	1	0	1	0	0	0	0	0	0	0	0	0	0	0	0	0	1
1039	14	18	A + WF	0	1	0	1	0	0	0	0	0	0	0	0	0	0	0	0	0	1
1040	14	18	A + WF	0	1	0	1	0	0	0	0	0	0	0	0	0	0	0	0	0	1
1041	13	1	A + WF	0	0	0	0	0	0	0	0	0	0	0	0	0	0	0	0	0	0
1042	13	2	A + WF	0	0	0	0	0	0	0	0	0	0	0	0	0	0	0	0	0	0
1043	13	3	A + WF	0	0	0	0	0	0	0	0	0	0	0	0	0	0	0	0	0	0
1044	13	4	A + WF	0	0	0	0	0	0	0	0	0	0	0	0	0	0	0	0	0	0
1045	13	5	A + WF	0	0	0	0	0	0	0	0	0	0	0	1	1	0	0	0	1	1
1046	13	5	A + WF	0	0	0	0	0	0	0	0	0	1	0	0	0	0	0	0	1	1
1047	13	5	A + WF	0	1	0	1	0	0	0	0	0	0	0	0	0	0	0	0	0	1
1048	13	5	A + WF	0	0	0	0	1	0	0	0	0	0	0	0	0	0	0	0	1	1
1049	13	5	A + WF	0	0	0	0	0	0	0	0	1	0	0	0	0	0	0	0	1	1
1050	13	5	A + WF	0	1	0	1	0	0	0	0	0	0	0	0	0	0	0	0	0	1
1051	13	5	A + WF	0	0	0	0	0	0	0	0	1	0	0	0	0	0	0	0	1	1
1052	13	5	A + WF	0	1	0	1	0	0	0	0	0	0	0	0	0	0	0	0	0	1
1053	13	6	A + WF	0	0	0	0	0	0	0	0	0	0	0	0	0	0	0	0	0	0
1054	13	7	A + WF	0	0	0	0	0	0	0	0	0	0	0	0	0	0	0	0	0	0
1055	13	8	A + WF	0	0	0	0	0	0	0	0	0	0	0	0	0	0	0	0	0	0
1056	13	9	A + WF	0	0	0	0	0	0	0	0	0	0	0	0	0	0	0	0	0	0
1057	13	10	A + WF	0	0	0	0	0	0	0	0	0	0	0	0	0	0	0	0	0	0
1058	13	11	A + WF	0	0	0	0	0	0	0	0	0	0	0	0	0	0	0	0	0	0
1059	13	11	A + WF	0	0	0	0	0	0	0	0	0	0	0	0	0	0	0	0	0	0
1060	13	12	A + WF	0	0	0	0	0	0	0	1	0	0	0	0	0	0	0	0	1	1
1061	13	12	A + WF	0	0	0	0	0	0	1	0	0	0	0	0	0	0	0	0	1	1
1062	13	12	A + WF	0	0	0	0	0	0	0	0	0	1	0	0	0	0	0	0	1	1
1063	13	12	A + WF	0	1	0	1	0	0	0	0	0	0	0	0	0	0	0	0	0	1
1064	13	12	A + WF	0	1	0	1	0	0	0	0	0	0	0	0	0	0	0	0	0	1
1065	13	12	A + WF	0	1	0	1	0	0	0	0	0	0	0	0	0	0	0	0	0	1
1066	13	12	A + WF	0	1	0	1	0	0	0	0	0	0	0	0	0	0	0	0	0	1
1067	13	12	A + WF	0	0	0	0	0	0	0	0	0	0	1	0	1	0	0	0	1	1
1068	13	12	A + WF	0	1	0	1	0	0	0	0	0	0	0	0	0	0	0	0	0	1
1069	13	12	A + WF	0	1	0	1	0	0	0	0	0	0	0	0	0	0	0	0	0	1
1070	13	12	A + WF	0	0	0	0	0	0	0	0	0	1	0	0	0	0	0	0	1	1
1071	13	13	A + WF	1	0	0	1	0	0	0	0	0	0	0	0	0	0	0	0	0	1
1072	13	13	A + WF	1	0	0	1	0	0	0	0	0	0	0	0	0	0	0	0	0	1
1073	13	13	A + WF	1	0	0	1	0	0	0	0	0	0	0	0	0	0	0	0	0	1
1074	13	13	A + WF	0	1	0	1	0	0	0	0	0	0	0	0	0	0	0	0	0	1
1075	13	13	A + WF	0	0	0	0	0	0	0	0	0	0	0	0	0	0	0	0	0	0
1076	13	14	A + WF	0	0	0	0	0	0	0	0	0	0	0	0	0	0	0	0	0	0
1077	13	15	A + WF	0	0	0	0	0	0	0	0	0	0	0	0	0	0	0	0	0	0
1078	13	16	A + WF	0	0	0	0	0	0	0	0	0	0	0	0	0	0	0	0	0	0
1079	13	17	A + WF	1	0	0	1	0	0	0	0	0	0	0	0	0	0	0	0	0	1
1080	13	17	A + WF	1	0	0	1	0	0	0	0	0	0	0	0	0	0	0	0	0	1
1081	13	17	A + WF	1	0	0	1	0	0	0	0	0	0	0	0	0	0	0	0	0	1
1082	13	17	A + WF	0	0	0	0	0	0	0	0	0	0	0	0	0	0	0	0	0	0
1083	13	18	A + WF	1	0	0	1	0	0	0	0	0	0	0	0	0	0	0	0	0	1
1084	13	18	A + WF	1	0	0	1	0	0	0	0	0	0	0	0	0	0	0	0	0	1
1085	13	18	A + WF	1	0	0	1	0	0	0	0	0	0	0	0	0	0	0	0	0	1
1086	13	18	A + WF	1	0	0	1	0	0	0	0	0	0	0	0	0	0	0	0	0	1
1087	13	18	A + WF	1	0	0	1	0	0	0	0	0	0	0	0	0	0	0	0	0	1
1088	13	18	A + WF	1	0	0	1	0	0	0	0	0	0	0	0	0	0	0	0	0	1
1089	13	18	A + WF	0	1	0	1	0	0	0	0	0	0	0	0	0	0	0	0	0	1
1090	13	18	A + WF	0	1	0	1	0	0	0	0	0	0	0	0	0	0	0	0	0	1
1091	13	18	A + WF	0	1	0	1	0	0	0	0	0	0	0	0	0	0	0	0	0	1
1092	13	18	A + WF	0	1	0	1	0	0	0	0	0	0	0	0	0	0	0	0	0	1
1093	13	19	A + WF	0	0	0	0	1	0	0	0	0	0	0	0	0	0	0	0	1	1
1094	13	19	A + WF	0	0	0	0	0	0	0	0	1	0	0	0	0	0	0	0	1	1
1095	13	19	A + WF	0	1	0	1	0	0	0	0	0	0	0	0	0	0	0	0	0	1
1096	13	19	A + WF	0	0	0	0	1	0	0	0	0	0	0	0	0	0	0	0	1	1
1097	13	19	A + WF	0	0	0	0	0	0	1	0	0	0	0	0	0	0	0	0	1	1
1098	13	19	A + WF	0	1	0	1	0	0	0	0	0	0	0	0	0	0	0	0	0	1
1099	13	19	A + WF	0	1	0	1	0	0	0	0	0	0	0	0	0	0	0	0	0	1
1100	13	19	A + WF	0	0	0	0	0	0	0	0	1	0	0	0	0	0	0	0	1	1
1101	13	19	A + WF	0	0	0	0	1	0	0	0	0	0	0	0	0	0	0	0	1	1
1102	13	19	A + WF	0	1	0	1	0	0	0	0	0	0	0	0	0	0	0	0	0	1
1103	13	19	A + WF	0	1	0	1	0	0	0	0	0	0	0	0	0	0	0	0	0	1
1104	13	20	A + WF	0	0	0	0	0	0	0	0	0	0	0	0	0	0	0	0	0	0
1105	12	1	A + WF	0	0	0	0	0	0	0	0	0	0	0	0	0	0	0	0	0	0
1106	12	2	A + WF	0	0	0	0	0	0	0	0	0	0	0	0	0	0	0	0	0	0
1107	12	3	A + WF	1	0	0	1	0	0	0	0	0	0	0	0	0	0	0	0	0	1
1108	12	3	A + WF	0	1	0	1	0	0	0	0	0	0	0	0	0	0	0	0	0	1
1109	12	3	A + WF	0	1	0	1	0	0	0	0	0	0	0	0	0	0	0	0	0	1
1110	12	3	A + WF	0	0	0	0	0	0	0	0	1	0	0	0	0	0	0	0	1	1
1111	12	3	A + WF	0	0	0	0	0	0	0	0	1	0	0	0	0	0	0	0	1	1
1112	12	3	A + WF	0	1	0	1	0	0	0	0	0	0	0	0	0	0	0	0	0	1
1113	12	3	A + WF	0	0	0	0	0	0	0	0	1	0	0	0	0	0	0	0	1	1
1114	12	3	A + WF	0	0	0	0	0	0	0	1	0	0	0	0	0	0	0	0	1	1
1115	12	3	A + WF	0	1	0	1	0	0	0	0	0	0	0	0	0	0	0	0	0	1
1116	12	3	A + WF	0	0	0	0	0	0	0	0	1	0	0	0	0	0	0	0	1	1
1117	12	4	A + WF	1	0	0	1	0	0	0	0	0	0	0	0	0	0	0	0	0	1
1118	12	4	A + WF	1	0	0	1	0	0	0	0	0	0	0	0	0	0	0	0	0	1
1119	12	4	A + WF	0	1	0	1	0	0	0	0	0	0	0	0	0	0	0	0	0	1
1120	12	4	A + WF	0	1	0	1	0	0	0	0	0	0	0	0	0	0	0	0	0	1
1121	12	4	A + WF	0	1	0	1	0	0	0	0	0	0	0	0	0	0	0	0	0	1
1122	12	4	A + WF	0	0	0	0	0	0	0	0	0	0	1	0	1	0	0	0	1	1
1123	12	4	A + WF	0	1	0	1	0	0	0	0	0	0	0	0	0	0	0	0	0	1
1124	12	4	A + WF	0	0	0	0	0	0	0	0	1	0	0	0	0	0	0	0	1	1
1125	12	4	A + WF	0	1	0	1	0	0	0	0	0	0	0	0	0	0	0	0	0	1
1126	12	4	A + WF	0	0	0	0	0	0	1	0	0	0	0	0	0	0	0	0	1	1
1127	12	5	A + WF	0	0	0	0	0	0	0	0	0	0	0	0	0	0	0	0	0	0
1128	12	6	A + WF	0	0	0	0	0	0	0	1	0	0	0	0	0	0	0	0	1	1
1129	12	6	A + WF	1	0	0	1	0	0	0	0	0	0	0	0	0	0	0	0	0	1
1130	12	6	A + WF	1	0	0	1	0	0	0	0	0	0	0	0	0	0	0	0	0	1
1131	12	6	A + WF	0	1	0	1	0	0	0	0	0	0	0	0	0	0	0	0	0	1
1132	12	6	A + WF	0	1	0	1	0	0	0	0	0	0	0	0	0	0	0	0	0	1
1133	12	6	A + WF	0	1	0	1	0	0	0	0	0	0	0	0	0	0	0	0	0	1
1134	12	6	A + WF	0	1	0	1	0	0	0	0	0	0	0	0	0	0	0	0	0	1
1135	12	6	A + WF	0	0	0	0	0	0	0	1	0	0	0	0	0	0	0	0	1	1
1136	12	6	A + WF	0	0	0	0	0	0	0	0	0	0	0	0	0	0	0	0	0	0
1137	12	7	A + WF	1	0	0	1	0	0	0	0	0	0	0	0	0	0	0	0	0	1
1138	12	7	A + WF	1	0	0	1	0	0	0	0	0	0	0	0	0	0	0	0	0	1
1139	12	7	A + WF	0	1	0	1	0	0	0	0	0	0	0	0	0	0	0	0	0	1
1140	12	7	A + WF	0	0	0	0	0	0	0	1	0	0	0	0	0	0	0	0	1	1
1141	12	7	A + WF	0	1	0	1	0	0	0	0	0	0	0	0	0	0	0	0	0	1
1142	12	7	A + WF	0	0	0	0	0	0	0	1	0	0	0	0	0	0	0	0	1	1
1143	12	7	A + WF	0	0	0	0	0	0	0	1	0	0	0	0	0	0	0	0	1	1
1144	12	7	A + WF	0	1	0	1	0	0	0	0	0	0	0	0	0	0	0	0	0	1
1145	12	7	A + WF	0	1	0	1	0	0	0	0	0	0	0	0	0	0	0	0	0	1
1146	12	7	A + WF	0	0	0	0	0	0	0	1	0	0	0	0	0	0	0	0	1	1
1147	12	8	A + WF	0	0	0	0	0	0	0	0	0	0	0	0	0	0	0	0	0	0
1148	12	9	A + WF	1	0	0	1	0	0	0	0	0	0	0	0	0	0	0	0	0	1
1149	12	9	A + WF	0	1	0	1	0	0	0	0	0	0	0	0	0	0	0	0	0	1
1150	12	10	A + WF	0	0	0	0	0	0	0	0	0	1	0	0	0	0	0	0	1	1
1151	12	10	A + WF	0	0	0	0	0	0	0	0	0	0	0	0	0	0	0	0	0	0
1152	12	11	A + WF	0	0	0	0	0	0	0	0	0	0	0	0	0	0	0	0	0	0
1153	12	12	A + WF	1	0	0	1	0	0	0	0	0	0	0	0	0	0	0	0	0	1
1154	11	1	WF only	0	0	0	0	0	0	0	0	1	0	0	0	0	0	0	0	1	1
1155	11	1	WF only	0	0	0	0	0	0	0	0	0	0	0	1	1	0	0	0	1	1
1156	11	1	WF only	0	1	0	1	0	0	0	0	0	0	0	0	0	0	0	0	0	1
1157	11	1	WF only	0	0	0	0	1	0	0	0	0	0	0	0	0	0	0	0	1	1
1158	11	1	WF only	0	0	0	0	0	0	0	0	1	0	0	0	0	0	0	0	1	1
1159	11	1	WF only	0	1	0	1	0	0	0	0	0	0	0	0	0	0	0	0	0	1
1160	11	1	WF only	0	1	0	1	0	0	0	0	0	0	0	0	0	0	0	0	0	1
1161	11	1	WF only	0	1	0	1	0	0	0	0	0	0	0	0	0	0	0	0	0	1
1162	11	1	WF only	0	1	0	1	0	0	0	0	0	0	0	0	0	0	0	0	0	1
1163	11	2	WF only	0	0	0	0	0	0	1	0	0	0	0	0	0	0	0	0	1	1
1164	11	2	WF only	0	0	0	0	0	0	0	0	0	0	0	0	0	0	0	0	0	0
1165	11	3	WF only	0	0	0	0	0	0	0	0	0	0	0	0	0	0	0	0	0	0
1166	11	4	WF only	0	0	0	0	0	0	0	0	0	0	0	0	0	0	0	0	0	0
1167	11	5	WF only	0	1	0	1	0	0	0	0	0	0	0	0	0	0	0	0	0	1
1168	11	5	WF only	0	0	0	0	0	0	0	0	0	0	0	0	0	0	0	0	0	0
1169	11	6	WF only	0	0	0	0	0	0	0	0	0	0	0	0	0	0	0	1	1	1
1170	11	6	WF only	0	0	0	0	0	0	0	0	1	0	0	0	0	0	0	0	1	1
1171	11	6	WF only	0	0	0	0	0	0	0	0	1	0	0	0	0	0	0	0	1	1
1172	11	6	WF only	0	0	0	0	0	0	0	0	0	1	0	0	0	0	0	0	1	1
1173	11	6	WF only	0	1	0	1	0	0	0	0	0	0	0	0	0	0	0	0	0	1
1174	11	6	WF only	0	1	0	1	0	0	0	0	0	0	0	0	0	0	0	0	0	1
1175	11	6	WF only	0	1	0	1	0	0	0	0	0	0	0	0	0	0	0	0	0	1
1176	11	6	WF only	0	1	0	1	0	0	0	0	0	0	0	0	0	0	0	0	0	1
1177	11	6	WF only	0	1	0	1	0	0	0	0	0	0	0	0	0	0	0	0	0	1
1178	11	6	WF only	0	1	0	1	0	0	0	0	0	0	0	0	0	0	0	0	0	1
1179	11	7	WF only	0	0	0	0	0	0	0	0	0	0	0	0	0	0	0	0	0	0
1180	11	8	WF only	0	0	0	0	0	0	0	0	0	0	0	0	0	0	0	0	0	0
1181	11	8	WF only	0	1	0	1	0	0	0	0	0	0	0	0	0	0	0	0	0	1
1182	11	8	WF only	0	1	0	1	0	0	0	0	0	0	0	0	0	0	0	0	0	1
1183	11	9	WF only	0	0	0	0	0	0	0	0	0	0	0	0	0	0	0	0	0	0
1184	11	10	WF only	0	0	0	0	0	0	0	0	0	0	0	0	0	0	0	0	0	0
1185	11	11	WF only	0	0	0	0	0	0	0	0	0	0	0	0	0	0	0	0	0	0
1186	11	11	WF only	0	0	0	0	0	0	0	0	0	0	0	0	0	0	0	0	0	0
1187	11	12	WF only	0	0	0	0	0	0	0	0	0	0	0	0	0	0	0	0	0	0
1188	11	12	WF only	0	1	0	1	0	0	0	0	0	0	0	0	0	0	0	0	0	1
1189	11	13	WF only	0	1	0	1	0	0	0	0	0	0	0	0	0	0	0	0	0	1
1190	11	13	WF only	0	0	0	0	0	0	0	0	0	0	1	0	1	0	0	0	1	1
1191	11	13	WF only	0	1	0	1	0	0	0	0	0	0	0	0	0	0	0	0	0	1
1192	11	13	WF only	0	1	0	1	0	0	0	0	0	0	0	0	0	0	0	0	0	1
1193	11	13	WF only	0	1	0	1	0	0	0	0	0	0	0	0	0	0	0	0	0	1
1194	11	13	WF only	0	1	0	1	0	0	0	0	0	0	0	0	0	0	0	0	0	1
1195	11	14	WF only	0	0	0	0	0	0	0	0	0	1	0	0	0	0	0	0	1	1
1196	11	14	WF only	0	0	0	0	0	0	0	0	0	1	0	0	0	0	0	0	1	1
1197	11	14	WF only	0	0	0	0	0	0	0	0	1	0	0	0	0	0	0	0	1	1
1198	11	14	WF only	0	1	0	1	0	0	0	0	0	0	0	0	0	0	0	0	0	1
1199	11	14	WF only	0	0	0	0	1	0	0	0	0	0	0	0	0	0	0	0	1	1
1200	11	14	WF only	0	1	0	1	0	0	0	0	0	0	0	0	0	0	0	0	0	1
1201	11	14	WF only	0	0	0	0	0	0	0	0	1	0	0	0	0	0	0	0	1	1
1202	11	14	WF only	0	1	0	1	0	0	0	0	0	0	0	0	0	0	0	0	0	1
1203	11	14	WF only	0	1	0	1	0	0	0	0	0	0	0	0	0	0	0	0	0	1
1204	11	14	WF only	0	1	0	1	0	0	0	0	0	0	0	0	0	0	0	0	0	1
1205	11	14	WF only	0	1	0	1	0	0	0	0	0	0	0	0	0	0	0	0	0	1
1206	11	15	WF only	0	0	0	0	0	0	0	0	0	0	0	0	0	0	0	0	0	0
1207	11	16	WF only	0	0	0	0	0	0	0	1	0	0	0	0	0	0	0	0	1	1
1208	11	17	WF only	0	0	0	0	0	0	0	1	0	0	0	0	0	0	0	0	1	1
1209	11	18	WF only	0	0	0	0	0	0	0	0	1	0	0	0	0	0	0	0	1	1
1210	11	18	WF only	0	0	0	0	0	0	0	0	0	0	0	0	0	0	0	0	0	0
1211	11	19	WF only	0	0	0	0	0	0	0	0	0	1	0	0	0	0	0	0	1	1
1212	11	19	WF only	0	0	0	0	0	0	0	0	1	0	0	0	0	0	0	0	1	1
1213	11	19	WF only	0	1	0	1	0	0	0	0	0	0	0	0	0	0	0	0	0	1
1214	11	19	WF only	0	1	0	1	0	0	0	0	0	0	0	0	0	0	0	0	0	1
1215	11	19	WF only	0	1	0	1	0	0	0	0	0	0	0	0	0	0	0	0	0	1
1216	11	19	WF only	0	1	0	1	0	0	0	0	0	0	0	0	0	0	0	0	0	1
1217	11	19	WF only	0	1	0	1	0	0	0	0	0	0	0	0	0	0	0	0	0	1
1218	11	19	WF only	0	1	0	1	0	0	0	0	0	0	0	0	0	0	0	0	0	1
1219	11	19	WF only	0	0	0	0	0	0	0	0	1	0	0	0	0	0	0	0	1	1
1220	11	19	WF only	0	1	0	1	0	0	0	0	0	0	0	0	0	0	0	0	0	1
1221	11	20	WF only	0	0	0	0	0	0	0	1	0	0	0	0	0	0	0	0	1	1
1222	11	20	WF only	1	0	0	1	0	0	0	0	0	0	0	0	0	0	0	0	0	1
1223	11	20	WF only	1	0	0	1	0	0	0	0	0	0	0	0	0	0	0	0	0	1
1224	11	20	WF only	0	1	0	1	0	0	0	0	0	0	0	0	0	0	0	0	0	1
1225	11	20	WF only	0	1	0	1	0	0	0	0	0	0	0	0	0	0	0	0	0	1
1226	11	20	WF only	0	0	0	0	0	0	0	0	1	0	0	0	0	0	0	0	1	1
1227	11	20	WF only	0	1	0	1	0	0	0	0	0	0	0	0	0	0	0	0	0	1
1228	11	20	WF only	0	0	0	0	0	0	0	0	1	0	0	0	0	0	0	0	1	1
1229	11	20	WF only	0	1	0	1	0	0	0	0	0	0	0	0	0	0	0	0	0	1
1230	11	21	WF only	1	0	0	1	0	0	0	0	0	0	0	0	0	0	0	0	0	1
1231	11	21	WF only	0	0	0	0	1	0	0	0	0	0	0	0	0	0	0	0	1	1
1232	11	21	WF only	0	0	0	0	0	0	0	0	1	0	0	0	0	0	0	0	1	1
1233	11	21	WF only	0	0	0	0	0	0	0	0	0	0	1	0	1	0	0	0	1	1
1234	11	21	WF only	0	0	0	0	0	0	0	0	0	0	1	0	1	0	0	0	1	1
1235	11	21	WF only	0	0	0	0	0	0	0	0	0	1	0	0	0	0	0	0	1	1
1236	11	21	WF only	0	0	0	0	0	0	0	0	1	0	0	0	0	0	0	0	1	1
1237	11	21	WF only	0	0	0	0	0	0	0	0	1	0	0	0	0	0	0	0	1	1
1238	11	21	WF only	0	0	0	0	0	0	0	0	0	0	1	0	1	0	0	0	1	1
1239	11	21	WF only	1	0	0	1	0	0	0	0	0	0	0	0	0	0	0	0	0	1
1240	11	22	WF only	0	0	0	0	0	0	0	0	0	0	0	0	0	0	0	0	0	0
1241	10	1	A only	0	0	0	0	0	0	0	0	0	0	0	0	0	0	0	0	0	0
1242	10	2	A only	0	0	0	0	0	0	0	0	0	0	0	0	0	0	0	0	0	0
1243	10	3	A only	0	0	0	0	0	0	0	0	0	0	0	0	0	0	0	0	0	0
1244	10	4	A only	1	0	0	1	0	0	0	0	0	0	0	0	0	0	0	0	0	1
1245	10	4	A only	0	1	0	1	0	0	0	0	0	0	0	0	0	0	0	0	0	1
1246	10	4	A only	0	1	0	1	0	0	0	0	0	0	0	0	0	0	0	0	0	1
1247	10	4	A only	0	0	0	0	0	0	0	0	0	0	0	0	0	0	0	0	0	0
1248	10	5	A only	0	0	0	0	0	0	0	1	0	0	0	0	0	0	0	0	1	1
1249	10	5	A only	0	0	0	0	0	0	0	0	0	0	0	0	0	0	0	0	0	0
1250	10	6	A only	0	0	0	0	0	0	0	1	0	0	0	0	0	0	0	0	1	1
1251	10	6	A only	0	0	0	0	0	1	0	0	0	0	0	0	0	0	0	0	1	1
1252	10	6	A only	0	0	0	0	0	1	0	0	0	0	0	0	0	0	0	0	1	1
1253	10	6	A only	0	0	0	0	0	1	0	0	0	0	0	0	0	0	0	0	1	1
1254	10	6	A only	0	0	0	0	0	1	0	0	0	0	0	0	0	0	0	0	1	1
1255	10	6	A only	0	0	0	0	0	1	0	0	0	0	0	0	0	0	0	0	1	1
1256	10	6	A only	0	0	0	0	0	1	0	0	0	0	0	0	0	0	0	0	1	1
1257	10	6	A only	0	0	0	0	0	1	0	0	0	0	0	0	0	0	0	0	1	1
1258	10	7	A only	0	1	0	1	0	0	0	0	0	0	0	0	0	0	0	0	0	1
1259	10	7	A only	0	0	0	0	0	0	0	0	0	0	0	0	0	0	0	0	0	0
1260	10	8	A only	0	0	0	0	0	0	0	0	0	0	0	0	0	0	0	0	0	0
1261	10	9	A only	0	1	0	1	0	0	0	0	0	0	0	0	0	0	0	0	0	1
1262	10	10	A only	0	1	0	1	0	0	0	0	0	0	0	0	0	0	0	0	0	1
1263	10	10	A only	1	0	0	1	0	0	0	0	0	0	0	0	0	0	0	0	0	1
1264	10	10	A only	0	0	0	0	0	0	0	0	1	0	0	0	0	0	0	0	1	1
1265	10	10	A only	0	1	0	1	0	0	0	0	0	0	0	0	0	0	0	0	0	1
1266	10	10	A only	0	1	0	1	0	0	0	0	0	0	0	0	0	0	0	0	0	1
1267	10	11	A only	1	0	0	1	0	0	0	0	0	0	0	0	0	0	0	0	0	1
1268	10	11	A only	0	1	0	1	0	0	0	0	0	0	0	0	0	0	0	0	0	1
1269	10	11	A only	0	0	0	0	0	0	0	0	0	0	0	0	0	0	0	0	0	0
1270	10	12	A only	0	0	0	0	0	0	0	0	1	0	0	0	0	0	0	0	1	1
1271	10	12	A only	0	1	0	1	0	0	0	0	0	0	0	0	0	0	0	0	0	1
1272	10	12	A only	0	0	0	0	0	0	0	0	0	0	0	0	0	0	0	0	0	0
1273	10	13	A only	0	1	0	1	0	0	0	0	0	0	0	0	0	0	0	0	0	1
1274	10	13	A only	0	1	0	1	0	0	0	0	0	0	0	0	0	0	0	0	0	1
1275	10	13	A only	0	1	0	1	0	0	0	0	0	0	0	0	0	0	0	0	0	1
1276	10	13	A only	0	1	0	1	0	0	0	0	0	0	0	0	0	0	0	0	0	1
1277	10	13	A only	0	1	0	1	0	0	0	0	0	0	0	0	0	0	0	0	0	1
1278	10	13	A only	0	1	0	1	0	0	0	0	0	0	0	0	0	0	0	0	0	1
1279	10	13	A only	0	1	0	1	0	0	0	0	0	0	0	0	0	0	0	0	0	1
1280	10	13	A only	0	1	0	1	0	0	0	0	0	0	0	0	0	0	0	0	0	1
1281	10	13	A only	0	1	0	1	0	0	0	0	0	0	0	0	0	0	0	0	0	1
1282	10	13	A only	0	0	0	0	0	0	0	0	0	0	0	0	0	0	0	0	0	0
1283	10	14	A only	0	0	0	0	0	0	0	0	0	0	0	0	0	0	0	0	0	0
1284	10	15	A only	0	0	0	0	0	0	0	0	0	0	0	0	0	0	0	0	0	0
1285	10	16	A only	0	0	0	0	0	0	0	0	0	0	0	0	0	0	0	0	0	0
1286	10	17	A only	1	0	0	1	0	0	0	0	0	0	0	0	0	0	0	0	0	1
1287	10	17	A only	0	1	0	1	0	0	0	0	0	0	0	0	0	0	0	0	0	1
1288	10	17	A only	0	0	0	0	0	0	0	0	0	0	1	0	1	0	0	0	1	1
1289	10	17	A only	0	1	0	1	0	0	0	0	0	0	0	0	0	0	0	0	0	1
1290	10	17	A only	0	1	0	1	0	0	0	0	0	0	0	0	0	0	0	0	0	1
1291	10	17	A only	0	1	0	1	0	0	0	0	0	0	0	0	0	0	0	0	0	1
1292	10	17	A only	0	1	0	1	0	0	0	0	0	0	0	0	0	0	0	0	0	1
1293	10	17	A only	0	0	0	0	0	0	0	0	0	0	1	0	1	0	0	0	1	1
1294	10	17	A only	0	0	0	0	0	0	0	0	0	1	0	0	0	0	0	0	1	1
1295	10	17	A only	0	0	0	0	0	0	0	0	0	0	0	0	0	0	0	0	0	0
1296	10	18	A only	0	0	0	0	0	0	0	0	0	0	0	0	0	0	0	0	0	0
1297	10	19	A only	0	0	0	0	0	0	0	0	0	0	0	0	0	0	0	0	0	0
1298	10	20	A only	0	0	0	0	0	0	0	0	0	0	0	0	0	0	0	0	0	0
1299	10	21	A only	1	0	0	1	0	0	0	0	0	0	0	0	0	0	0	0	0	1
1300	10	21	A only	1	0	0	1	0	0	0	0	0	0	0	0	0	0	0	0	0	1
1301	10	21	A only	0	1	0	1	0	0	0	0	0	0	0	0	0	0	0	0	0	1
1302	10	21	A only	0	0	0	0	0	0	0	0	0	0	0	0	0	0	0	0	0	0
1303	10	21	A only	0	0	0	0	0	0	0	0	0	0	0	0	0	0	0	0	0	0
1304	10	22	A only	0	0	0	0	0	0	0	0	0	0	0	0	0	0	0	0	0	0
1305	10	22	A only	0	1	0	1	0	0	0	0	0	0	0	0	0	0	0	0	0	1
1306	10	22	A only	0	0	0	0	0	0	0	0	0	0	0	0	0	0	0	0	0	0
1307	10	23	A only	1	0	0	1	0	0	0	0	0	0	0	0	0	0	0	0	0	1
1308	10	23	A only	1	0	0	1	0	0	0	0	0	0	0	0	0	0	0	0	0	1
1309	10	23	A only	1	0	0	1	0	0	0	0	0	0	0	0	0	0	0	0	0	1
1310	10	23	A only	0	0	0	0	0	0	0	0	0	0	0	0	0	0	0	0	0	0
1311	10	24	A only	0	1	0	1	0	0	0	0	0	0	0	0	0	0	0	0	0	1
1312	10	24	A only	0	1	0	1	0	0	0	0	0	0	0	0	0	0	0	0	0	1
1313	10	24	A only	0	1	0	1	0	0	0	0	0	0	0	0	0	0	0	0	0	1
1314	10	24	A only	0	1	0	1	0	0	0	0	0	0	0	0	0	0	0	0	0	1
1315	10	24	A only	1	0	0	1	0	0	0	0	0	0	0	0	0	0	0	0	0	1
1316	10	24	A only	0	0	0	0	0	0	0	0	0	0	0	0	0	0	0	0	0	0
1317	10	25	A only	0	0	0	0	0	0	0	1	0	0	0	0	0	0	0	0	1	1
1318	10	25	A only	0	0	0	0	0	0	0	1	0	0	0	0	0	0	0	0	1	1
1319	10	25	A only	1	0	0	1	0	0	0	0	0	0	0	0	0	0	0	0	0	1
1320	10	25	A only	0	1	0	1	0	0	0	0	0	0	0	0	0	0	0	0	0	1
1321	10	25	A only	0	1	0	1	0	0	0	0	0	0	0	0	0	0	0	0	0	1
1322	10	25	A only	0	0	0	0	0	0	0	0	1	0	0	0	0	0	0	0	1	1
1323	10	25	A only	0	1	0	1	0	0	0	0	0	0	0	0	0	0	0	0	0	1
1324	10	25	A only	0	0	0	0	0	0	0	0	1	0	0	0	0	0	0	0	1	1
1325	10	25	A only	0	1	0	1	0	0	0	0	0	0	0	0	0	0	0	0	0	1
1326	10	25	A only	0	1	0	1	0	0	0	0	0	0	0	0	0	0	0	0	0	1
1327	9	1	A + WF	0	0	0	0	0	0	0	1	0	0	0	0	0	0	0	0	1	1
1328	9	1	A + WF	0	0	0	0	0	1	0	0	0	0	0	0	0	0	0	0	1	1
1329	9	1	A + WF	0	0	0	0	0	0	0	0	0	0	0	0	0	0	0	0	0	0
1330	9	2	A + WF	0	0	0	0	0	0	0	0	0	0	0	0	0	0	0	0	0	0
1331	9	3	A + WF	1	0	0	1	0	0	0	0	0	0	0	0	0	0	0	0	0	1
1332	9	3	A + WF	1	0	0	1	0	0	0	0	0	0	0	0	0	0	0	0	0	1
1333	9	3	A + WF	0	0	0	0	0	0	0	0	1	0	0	0	0	0	0	0	1	1
1334	9	3	A + WF	0	1	0	1	0	0	0	0	0	0	0	0	0	0	0	0	0	1
1335	9	3	A + WF	0	1	0	1	0	0	0	0	0	0	0	0	0	0	0	0	0	1
1336	9	3	A + WF	0	1	0	1	0	0	0	0	0	0	0	0	0	0	0	0	0	1
1337	9	3	A + WF	0	0	0	0	0	0	0	0	0	0	0	0	0	0	0	1	1	1
1338	9	3	A + WF	0	0	0	0	0	0	0	1	0	0	0	0	0	0	0	0	1	1
1339	9	3	A + WF	0	0	0	0	0	0	0	1	0	0	0	0	0	0	0	0	1	1
1340	9	3	A + WF	0	0	0	0	0	0	0	1	0	0	0	0	0	0	0	0	1	1
1341	9	4	A + WF	0	0	0	0	0	0	0	0	0	0	1	0	1	0	0	0	1	1
1342	9	4	A + WF	0	1	0	1	0	0	0	0	0	0	0	0	0	0	0	0	0	1
1343	9	4	A + WF	0	1	0	1	0	0	0	0	0	0	0	0	0	0	0	0	0	1
1344	9	4	A + WF	0	1	0	1	0	0	0	0	0	0	0	0	0	0	0	0	0	1
1345	9	4	A + WF	0	1	0	1	0	0	0	0	0	0	0	0	0	0	0	0	0	1
1346	9	4	A + WF	0	1	0	1	0	0	0	0	0	0	0	0	0	0	0	0	0	1
1347	9	4	A + WF	0	0	0	0	0	0	0	1	0	0	0	0	0	0	0	0	1	1
1348	9	4	A + WF	0	1	0	1	0	0	0	0	0	0	0	0	0	0	0	0	0	1
1349	9	4	A + WF	0	1	0	1	0	0	0	0	0	0	0	0	0	0	0	0	0	1
1350	9	4	A + WF	0	1	0	1	0	0	0	0	0	0	0	0	0	0	0	0	0	1
1351	9	5	A + WF	0	0	0	0	0	0	0	0	0	1	0	0	0	0	0	0	1	1
1352	9	5	A + WF	0	1	0	1	0	0	0	0	0	0	0	0	0	0	0	0	0	1
1353	9	5	A + WF	0	1	0	1	0	0	0	0	0	0	0	0	0	0	0	0	0	1
1354	9	5	A + WF	0	1	0	1	0	0	0	0	0	0	0	0	0	0	0	0	0	1
1355	9	5	A + WF	0	1	0	1	0	0	0	0	0	0	0	0	0	0	0	0	0	1
1356	9	5	A + WF	0	1	0	1	0	0	0	0	0	0	0	0	0	0	0	0	0	1
1357	9	5	A + WF	0	1	0	1	0	0	0	0	0	0	0	0	0	0	0	0	0	1
1358	9	5	A + WF	0	1	0	1	0	0	0	0	0	0	0	0	0	0	0	0	0	1
1359	9	5	A + WF	0	1	0	1	0	0	0	0	0	0	0	0	0	0	0	0	0	1
1360	9	6	A + WF	0	0	0	0	0	0	0	0	0	0	0	0	0	0	0	0	0	0
1361	9	7	A + WF	0	1	0	1	0	0	0	0	0	0	0	0	0	0	0	0	0	1
1362	9	7	A + WF	0	1	0	1	0	0	0	0	0	0	0	0	0	0	0	0	0	1
1363	9	7	A + WF	0	1	0	1	0	0	0	0	0	0	0	0	0	0	0	0	0	1
1364	9	7	A + WF	0	1	0	1	0	0	0	0	0	0	0	0	0	0	0	0	0	1
1365	9	7	A + WF	0	1	0	1	0	0	0	0	0	0	0	0	0	0	0	0	0	1
1366	9	7	A + WF	0	1	0	1	0	0	0	0	0	0	0	0	0	0	0	0	0	1
1367	9	7	A + WF	0	1	0	1	0	0	0	0	0	0	0	0	0	0	0	0	0	1
1368	9	7	A + WF	0	1	0	1	0	0	0	0	0	0	0	0	0	0	0	0	0	1
1369	9	7	A + WF	0	1	0	1	0	0	0	0	0	0	0	0	0	0	0	0	0	1
1370	9	7	A + WF	0	1	0	1	0	0	0	0	0	0	0	0	0	0	0	0	0	1
1371	9	7	A + WF	0	1	0	1	0	0	0	0	0	0	0	0	0	0	0	0	0	1
1372	9	8	A + WF	0	0	0	0	0	0	0	0	0	0	0	0	0	0	0	0	0	0
1373	9	9	A + WF	1	0	0	1	0	0	0	0	0	0	0	0	0	0	0	0	0	1
1374	9	9	A + WF	1	0	0	1	0	0	0	0	0	0	0	0	0	0	0	0	0	1
1375	9	9	A + WF	1	0	0	1	0	0	0	0	0	0	0	0	0	0	0	0	0	1
1376	9	9	A + WF	0	1	0	1	0	0	0	0	0	0	0	0	0	0	0	0	0	1
1377	9	9	A + WF	0	1	0	1	0	0	0	0	0	0	0	0	0	0	0	0	0	1
1378	9	9	A + WF	0	1	0	1	0	0	0	0	0	0	0	0	0	0	0	0	0	1
1379	9	9	A + WF	0	1	0	1	0	0	0	0	0	0	0	0	0	0	0	0	0	1
1380	9	9	A + WF	0	1	0	1	0	0	0	0	0	0	0	0	0	0	0	0	0	1
1381	9	9	A + WF	0	1	0	1	0	0	0	0	0	0	0	0	0	0	0	0	0	1
1382	9	9	A + WF	0	1	0	1	0	0	0	0	0	0	0	0	0	0	0	0	0	1
1383	9	10	A + WF	0	0	0	0	0	0	0	0	0	1	0	0	0	0	0	0	1	1
1384	9	10	A + WF	0	0	0	0	0	0	0	0	0	0	1	0	1	0	0	0	1	1
1385	9	10	A + WF	0	1	0	1	0	0	0	0	0	0	0	0	0	0	0	0	0	1
1386	9	10	A + WF	0	1	0	1	0	0	0	0	0	0	0	0	0	0	0	0	0	1
1387	9	10	A + WF	0	1	0	1	0	0	0	0	0	0	0	0	0	0	0	0	0	1
1388	9	10	A + WF	0	1	0	1	0	0	0	0	0	0	0	0	0	0	0	0	0	1
1389	9	10	A + WF	0	0	0	0	0	0	0	1	0	0	0	0	0	0	0	0	1	1
1390	9	10	A + WF	0	0	0	0	0	0	0	1	0	0	0	0	0	0	0	0	1	1
1391	9	11	A + WF	1	0	0	1	0	0	0	0	0	0	0	0	0	0	0	0	0	1
1392	9	11	A + WF	0	1	0	1	0	0	0	0	0	0	0	0	0	0	0	0	0	1
1393	9	11	A + WF	1	0	0	1	0	0	0	0	0	0	0	0	0	0	0	0	0	1
1394	9	11	A + WF	0	1	0	1	0	0	0	0	0	0	0	0	0	0	0	0	0	1
1395	9	11	A + WF	0	1	0	1	0	0	0	0	0	0	0	0	0	0	0	0	0	1
1396	9	11	A + WF	0	1	0	1	0	0	0	0	0	0	0	0	0	0	0	0	0	1
1397	9	11	A + WF	0	1	0	1	0	0	0	0	0	0	0	0	0	0	0	0	0	1
1398	9	11	A + WF	0	1	0	1	0	0	0	0	0	0	0	0	0	0	0	0	0	1
1399	9	11	A + WF	0	1	0	1	0	0	0	0	0	0	0	0	0	0	0	0	0	1
1400	9	11	A + WF	0	1	0	1	0	0	0	0	0	0	0	0	0	0	0	0	0	1
1401	9	11	A + WF	0	1	0	1	0	0	0	0	0	0	0	0	0	0	0	0	0	1
1402	9	12	A + WF	0	1	0	1	0	0	0	0	0	0	0	0	0	0	0	0	0	1
1403	9	12	A + WF	0	1	0	1	0	0	0	0	0	0	0	0	0	0	0	0	0	1
1404	9	12	A + WF	0	1	0	1	0	0	0	0	0	0	0	0	0	0	0	0	0	1
1405	9	12	A + WF	1	0	0	1	0	0	0	0	0	0	0	0	0	0	0	0	0	1
1406	9	12	A + WF	0	1	0	1	0	0	0	0	0	0	0	0	0	0	0	0	0	1
1407	9	12	A + WF	0	1	0	1	0	0	0	0	0	0	0	0	0	0	0	0	0	1
1408	9	12	A + WF	0	1	0	1	0	0	0	0	0	0	0	0	0	0	0	0	0	1
1409	9	12	A + WF	0	1	0	1	0	0	0	0	0	0	0	0	0	0	0	0	0	1
1410	9	12	A + WF	0	1	0	1	0	0	0	0	0	0	0	0	0	0	0	0	0	1
1411	9	12	A + WF	0	0	0	0	0	0	0	1	0	0	0	0	0	0	0	0	1	1
1412	9	12	A + WF	0	0	0	0	0	0	0	1	0	0	0	0	0	0	0	0	1	1
1413	9	13	A + WF	0	1	0	1	0	0	0	0	0	0	0	0	0	0	0	0	0	1
1414	9	13	A + WF	0	0	0	0	0	0	0	0	0	0	0	0	0	0	0	0	0	0
1415	9	13	A + WF	0	0	0	0	0	0	0	0	0	0	0	0	0	0	0	0	0	0
1416	9	13	A + WF	0	0	0	0	0	0	0	0	0	0	0	0	0	0	0	0	0	0
1417	9	14	A + WF	0	0	0	0	0	0	0	0	0	0	0	0	0	0	0	0	0	0
1418	9	15	A + WF	1	0	0	1	0	0	0	0	0	0	0	0	0	0	0	0	0	1
1419	9	15	A + WF	1	0	0	1	0	0	0	0	0	0	0	0	0	0	0	0	0	1
1420	9	15	A + WF	1	0	0	1	0	0	0	0	0	0	0	0	0	0	0	0	0	1
1421	9	15	A + WF	0	0	0	0	0	0	0	0	1	0	0	0	0	0	0	0	1	1
1422	9	15	A + WF	0	1	0	1	0	0	0	0	0	0	0	0	0	0	0	0	0	1
1423	9	15	A + WF	0	1	0	1	0	0	0	0	0	0	0	0	0	0	0	0	0	1
1424	9	15	A + WF	0	0	0	0	0	0	0	1	0	0	0	0	0	0	0	0	1	1
1425	9	15	A + WF	0	0	0	0	0	0	0	1	0	0	0	0	0	0	0	0	1	1
1426	9	16	A + WF	0	0	0	0	0	0	0	0	0	1	0	0	0	0	0	0	1	1
1427	9	16	A + WF	0	1	0	1	0	0	0	0	0	0	0	0	0	0	0	0	0	1
1428	9	16	A + WF	0	0	0	0	0	0	0	0	0	1	0	0	0	0	0	0	1	1
1429	9	16	A + WF	1	0	0	1	0	0	0	0	0	0	0	0	0	0	0	0	0	1
1430	9	16	A + WF	0	1	0	1	0	0	0	0	0	0	0	0	0	0	0	0	0	1
1431	9	17	A + WF	0	0	0	0	0	0	0	0	1	0	0	0	0	0	0	0	1	1
1432	9	17	A + WF	1	0	0	1	0	0	0	0	0	0	0	0	0	0	0	0	0	1
1433	9	17	A + WF	0	1	0	1	0	0	0	0	0	0	0	0	0	0	0	0	0	1
1434	9	17	A + WF	0	1	0	1	0	0	0	0	0	0	0	0	0	0	0	0	0	1
1435	9	17	A + WF	0	1	0	1	0	0	0	0	0	0	0	0	0	0	0	0	0	1
1436	9	17	A + WF	0	0	0	0	0	0	0	0	0	0	1	0	1	0	0	0	1	1
1437	9	17	A + WF	0	0	0	0	0	0	0	0	0	0	0	0	0	0	0	0	0	0
1438	9	17	A + WF	0	1	0	1	0	0	0	0	0	0	0	0	0	0	0	0	0	1
1439	9	17	A + WF	0	0	0	0	0	0	0	1	0	0	0	0	0	0	0	0	1	1
1440	9	18	A + WF	1	0	0	1	0	0	0	0	0	0	0	0	0	0	0	0	0	1
1441	9	18	A + WF	0	0	0	0	0	0	0	0	0	0	0	0	0	0	0	0	0	0
1442	9	19	A + WF	0	0	0	0	0	0	0	0	0	0	0	0	0	0	0	1	1	1
1443	9	19	A + WF	1	0	0	1	0	0	0	0	0	0	0	0	0	0	0	0	0	1
1444	9	19	A + WF	0	1	0	1	0	0	0	0	0	0	0	0	0	0	0	0	0	1
1445	9	19	A + WF	0	1	0	1	0	0	0	0	0	0	0	0	0	0	0	0	0	1
1446	9	19	A + WF	0	0	0	0	0	0	0	1	0	0	0	0	0	0	0	0	1	1
1447	9	20	A + WF	0	0	0	0	0	0	0	0	0	0	0	0	0	0	0	0	0	0
1448	9	20	A + WF	0	0	0	0	0	0	0	0	0	0	0	0	0	0	0	0	0	0
1449	9	20	A + WF	1	0	0	1	0	0	0	0	0	0	0	0	0	0	0	0	0	1
1450	9	20	A + WF	1	0	0	1	0	0	0	0	0	0	0	0	0	0	0	0	0	1
1451	9	20	A + WF	1	0	0	1	0	0	0	0	0	0	0	0	0	0	0	0	0	1
1452	9	20	A + WF	0	1	0	1	0	0	0	0	0	0	0	0	0	0	0	0	0	1
1453	9	20	A + WF	0	1	0	1	0	0	0	0	0	0	0	0	0	0	0	0	0	1
1454	9	20	A + WF	0	1	0	1	0	0	0	0	0	0	0	0	0	0	0	0	0	1
1455	9	20	A + WF	0	1	0	1	0	0	0	0	0	0	0	0	0	0	0	0	0	1
1456	9	21	A + WF	0	0	0	0	0	0	0	0	0	0	0	0	0	0	0	0	0	0
1457	9	22	A + WF	1	0	0	1	0	0	0	0	0	0	0	0	0	0	0	0	0	1
1458	9	22	A + WF	1	0	0	1	0	0	0	0	0	0	0	0	0	0	0	0	0	1
1459	9	22	A + WF	0	1	0	1	0	0	0	0	0	0	0	0	0	0	0	0	0	1
1460	9	22	A + WF	0	0	0	0	0	0	0	1	0	0	0	0	0	0	0	0	1	1
1461	9	22	A + WF	0	0	0	0	0	0	0	1	0	0	0	0	0	0	0	0	1	1
1462	9	22	A + WF	0	0	0	0	0	0	0	1	0	0	0	0	0	0	0	0	1	1
1463	9	22	A + WF	0	0	0	0	0	0	0	1	0	0	0	0	0	0	0	0	1	1
1464	9	22	A + WF	0	1	0	1	0	0	0	0	0	0	0	0	0	0	0	0	0	1
1465	9	23	A + WF	0	0	0	0	0	0	0	0	0	1	0	0	0	0	0	0	1	1
1466	9	23	A + WF	0	0	0	0	0	0	0	0	0	1	0	0	0	0	0	0	1	1
1467	9	23	A + WF	0	1	0	1	0	0	0	0	0	0	0	0	0	0	0	0	0	1
1468	9	23	A + WF	0	1	0	1	0	0	0	0	0	0	0	0	0	0	0	0	0	1
1469	9	23	A + WF	0	1	0	1	0	0	0	0	0	0	0	0	0	0	0	0	0	1
1470	9	23	A + WF	0	1	0	1	0	0	0	0	0	0	0	0	0	0	0	0	0	1
1471	9	23	A + WF	0	1	0	1	0	0	0	0	0	0	0	0	0	0	0	0	0	1
1472	9	23	A + WF	0	1	0	1	0	0	0	0	0	0	0	0	0	0	0	0	0	1
1473	8	1	WF only	0	0	0	0	1	0	0	0	0	0	0	0	0	0	0	0	1	1
1474	8	1	WF only	0	0	0	0	0	0	0	1	0	0	0	0	0	0	0	0	1	1
1475	8	1	WF only	0	0	0	0	0	0	0	0	0	0	1	0	1	0	0	0	1	1
1476	8	1	WF only	0	0	0	0	0	0	0	0	0	1	0	0	0	0	0	0	1	1
1477	8	1	WF only	0	0	0	0	0	0	0	0	0	1	0	0	0	0	0	0	1	1
1478	8	1	WF only	0	0	0	0	0	0	0	0	1	0	0	0	0	0	0	0	1	1
1479	8	1	WF only	0	0	0	0	1	0	0	0	0	0	0	0	0	0	0	0	1	1
1480	8	1	WF only	0	0	0	0	1	0	0	0	0	0	0	0	0	0	0	0	1	1
1481	8	1	WF only	0	0	0	0	1	0	0	0	0	0	0	0	0	0	0	0	1	1
1482	8	1	WF only	0	0	0	0	0	0	0	0	1	0	0	0	0	0	0	0	1	1
1483	8	1	WF only	0	0	0	0	0	0	0	0	0	1	0	0	0	0	0	0	1	1
1484	8	2	WF only	1	0	0	1	0	0	0	0	0	0	0	0	0	0	0	0	0	1
1485	8	2	WF only	0	0	0	0	0	0	0	0	1	0	0	0	0	0	0	0	1	1
1486	8	2	WF only	0	1	0	1	0	0	0	0	0	0	0	0	0	0	0	0	0	1
1487	8	2	WF only	0	1	0	1	0	0	0	0	0	0	0	0	0	0	0	0	0	1
1488	8	2	WF only	0	1	0	1	0	0	0	0	0	0	0	0	0	0	0	0	0	1
1489	8	2	WF only	0	1	0	1	0	0	0	0	0	0	0	0	0	0	0	0	0	1
1490	8	2	WF only	0	1	0	1	0	0	0	0	0	0	0	0	0	0	0	0	0	1
1491	8	2	WF only	0	1	0	1	0	0	0	0	0	0	0	0	0	0	0	0	0	1
1492	8	2	WF only	0	0	0	0	0	0	0	0	0	0	0	0	0	0	0	0	0	0
1493	8	3	WF only	0	0	0	0	0	0	0	0	0	0	0	0	0	0	0	0	0	0
1494	8	3	WF only	0	0	0	0	1	0	0	0	0	0	0	0	0	0	0	0	1	1
1495	8	3	WF only	0	0	0	0	1	0	0	0	0	0	0	0	0	0	0	0	1	1
1496	8	3	WF only	0	1	0	1	0	0	0	0	0	0	0	0	0	0	0	0	0	1
1497	8	3	WF only	0	1	0	1	0	0	0	0	0	0	0	0	0	0	0	0	0	1
1498	8	3	WF only	0	0	0	0	0	0	0	0	0	0	1	0	1	0	0	0	1	1
1499	8	3	WF only	0	1	0	1	0	0	0	0	0	0	0	0	0	0	0	0	0	1
1500	8	3	WF only	0	0	0	0	0	0	0	1	0	0	0	0	0	0	0	0	1	1
1501	8	4	WF only	0	0	0	0	0	0	0	0	0	1	0	0	0	0	0	0	1	1
1502	8	4	WF only	1	0	0	1	0	0	0	0	0	0	0	0	0	0	0	0	0	1
1503	8	4	WF only	0	1	0	1	0	0	0	0	0	0	0	0	0	0	0	0	0	1
1504	8	4	WF only	0	1	0	1	0	0	0	0	0	0	0	0	0	0	0	0	0	1
1505	8	4	WF only	0	1	0	1	0	0	0	0	0	0	0	0	0	0	0	0	0	1
1506	8	4	WF only	0	1	0	1	0	0	0	0	0	0	0	0	0	0	0	0	0	1
1507	8	4	WF only	0	1	0	1	0	0	0	0	0	0	0	0	0	0	0	0	0	1
1508	8	4	WF only	0	1	0	1	0	0	0	0	0	0	0	0	0	0	0	0	0	1
1509	8	4	WF only	0	1	0	1	0	0	0	0	0	0	0	0	0	0	0	0	0	1
1510	8	4	WF only	0	0	0	0	0	0	0	1	0	0	0	0	0	0	0	0	1	1
1511	8	5	WF only	0	0	0	0	0	0	0	0	0	0	0	0	0	0	0	0	0	0
1512	8	5	WF only	0	0	0	0	0	0	0	1	0	0	0	0	0	0	0	0	1	1
1513	8	6	WF only	1	0	0	1	0	0	0	0	0	0	0	0	0	0	0	0	0	1
1514	8	6	WF only	0	1	0	1	0	0	0	0	0	0	0	0	0	0	0	0	0	1
1515	8	6	WF only	0	1	0	1	0	0	0	0	0	0	0	0	0	0	0	0	0	1
1516	8	6	WF only	0	1	0	1	0	0	0	0	0	0	0	0	0	0	0	0	0	1
1517	8	6	WF only	0	1	0	1	0	0	0	0	0	0	0	0	0	0	0	0	0	1
1518	8	6	WF only	0	1	0	1	0	0	0	0	0	0	0	0	0	0	0	0	0	1
1519	8	6	WF only	0	1	0	1	0	0	0	0	0	0	0	0	0	0	0	0	0	1
1520	8	6	WF only	0	1	0	1	0	0	0	0	0	0	0	0	0	0	0	0	0	1
1521	8	7	WF only	1	0	0	1	0	0	0	0	0	0	0	0	0	0	0	0	0	1
1522	8	7	WF only	1	0	0	1	0	0	0	0	0	0	0	0	0	0	0	0	0	1
1523	8	7	WF only	1	0	0	1	0	0	0	0	0	0	0	0	0	0	0	0	0	1
1524	8	7	WF only	0	1	0	1	0	0	0	0	0	0	0	0	0	0	0	0	0	1
1525	8	7	WF only	0	1	0	1	0	0	0	0	0	0	0	0	0	0	0	0	0	1
1526	8	7	WF only	0	1	0	1	0	0	0	0	0	0	0	0	0	0	0	0	0	1
1527	8	7	WF only	0	1	0	1	0	0	0	0	0	0	0	0	0	0	0	0	0	1
1528	8	7	WF only	0	1	0	1	0	0	0	0	0	0	0	0	0	0	0	0	0	1
1529	8	7	WF only	0	1	0	1	0	0	0	0	0	0	0	0	0	0	0	0	0	1
1530	8	7	WF only	0	0	0	0	0	0	0	1	0	0	0	0	0	0	0	0	1	1
1531	8	7	WF only	0	1	0	1	0	0	0	0	0	0	0	0	0	0	0	0	0	1
1532	8	7	WF only	0	0	0	0	0	0	0	1	0	0	0	0	0	0	0	0	1	1
1533	8	8	WF only	0	1	0	1	0	0	0	0	0	0	0	0	0	0	0	0	0	1
1534	8	8	WF only	0	1	0	1	0	0	0	0	0	0	0	0	0	0	0	0	0	1
1535	8	8	WF only	0	1	0	1	0	0	0	0	0	0	0	0	0	0	0	0	0	1
1536	8	8	WF only	0	1	0	1	0	0	0	0	0	0	0	0	0	0	0	0	0	1
1537	8	8	WF only	0	0	0	0	0	0	0	0	0	0	0	0	0	0	0	0	0	0
1538	8	8	WF only	0	0	0	0	0	0	0	0	0	0	0	0	0	0	0	0	0	0
1539	8	9	WF only	0	1	0	1	0	0	0	0	0	0	0	0	0	0	0	0	0	1
1540	8	9	WF only	0	0	0	0	0	0	0	0	1	0	0	0	0	0	0	0	1	1
1541	8	9	WF only	0	1	0	1	0	0	0	0	0	0	0	0	0	0	0	0	0	1
1542	8	9	WF only	0	1	0	1	0	0	0	0	0	0	0	0	0	0	0	0	0	1
1543	8	9	WF only	0	1	0	1	0	0	0	0	0	0	0	0	0	0	0	0	0	1
1544	8	9	WF only	0	1	0	1	0	0	0	0	0	0	0	0	0	0	0	0	0	1
1545	8	9	WF only	0	1	0	1	0	0	0	0	0	0	0	0	0	0	0	0	0	1
1546	8	9	WF only	0	1	0	1	0	0	0	0	0	0	0	0	0	0	0	0	0	1
1547	8	10	WF only	0	0	0	0	0	0	0	0	0	0	0	0	0	0	0	1	1	1
1548	8	10	WF only	1	0	0	1	0	0	0	0	0	0	0	0	0	0	0	0	0	1
1549	8	10	WF only	0	1	0	1	0	0	0	0	0	0	0	0	0	0	0	0	0	1
1550	8	10	WF only	0	1	0	1	0	0	0	0	0	0	0	0	0	0	0	0	0	1
1551	8	10	WF only	0	0	0	0	0	0	0	0	1	0	0	0	0	0	0	0	1	1
1552	8	10	WF only	0	0	0	0	0	0	0	1	0	0	0	0	0	0	0	0	1	1
1553	8	10	WF only	0	0	0	0	0	0	0	0	0	0	0	0	0	0	0	0	0	0
1554	8	11	WF only	0	1	0	1	0	0	0	0	0	0	0	0	0	0	0	0	0	1
1555	8	12	WF only	0	0	0	0	0	0	0	1	0	0	0	0	0	0	0	0	1	1
1556	8	13	WF only	1	0	0	1	0	0	0	0	0	0	0	0	0	0	0	0	0	1
1557	8	13	WF only	1	0	0	1	0	0	0	0	0	0	0	0	0	0	0	0	0	1
1558	8	13	WF only	0	1	0	1	0	0	0	0	0	0	0	0	0	0	0	0	0	1
1559	8	13	WF only	0	0	0	0	0	0	0	0	1	0	0	0	0	0	0	0	1	1
1560	8	13	WF only	0	0	0	0	0	0	0	1	0	0	0	0	0	0	0	0	1	1
1561	8	13	WF only	0	0	0	0	0	0	0	0	0	0	0	0	0	0	0	0	0	0
1562	8	14	WF only	0	0	0	0	0	0	0	1	0	0	0	0	0	0	0	0	1	1
1563	8	15	WF only	0	0	0	0	0	0	0	1	0	0	0	0	0	0	0	0	1	1
1564	8	15	WF only	0	0	0	0	0	0	0	1	0	0	0	0	0	0	0	0	1	1
1565	8	15	WF only	0	0	0	0	0	0	0	0	0	1	0	0	0	0	0	0	1	1
1566	8	15	WF only	0	0	0	0	0	0	0	1	0	0	0	0	0	0	0	0	1	1
1567	8	15	WF only	0	0	0	0	0	0	0	1	0	0	0	0	0	0	0	0	1	1
1568	8	15	WF only	0	0	0	0	0	0	0	1	0	0	0	0	0	0	0	0	1	1
1569	8	15	WF only	0	1	0	1	0	0	0	0	0	0	0	0	0	0	0	0	0	1
1570	8	15	WF only	0	0	0	0	0	0	0	0	0	1	0	0	0	0	0	0	1	1
1571	8	15	WF only	0	0	0	0	0	0	0	1	0	0	0	0	0	0	0	0	1	1
1572	8	16	WF only	0	0	0	0	0	0	0	0	0	0	0	0	0	0	0	0	0	0
1573	7	1	A only	0	0	0	0	0	0	0	0	1	0	0	0	0	0	0	0	1	1
1574	7	1	A only	0	1	0	1	0	0	0	0	0	0	0	0	0	0	0	0	0	1
1575	7	1	A only	0	1	0	1	0	0	0	0	0	0	0	0	0	0	0	0	0	1
1576	7	1	A only	0	1	0	1	0	0	0	0	0	0	0	0	0	0	0	0	0	1
1577	7	1	A only	0	1	0	1	0	0	0	0	0	0	0	0	0	0	0	0	0	1
1578	7	1	A only	0	1	0	1	0	0	0	0	0	0	0	0	0	0	0	0	0	1
1579	7	1	A only	0	1	0	1	0	0	0	0	0	0	0	0	0	0	0	0	0	1
1580	7	1	A only	0	1	0	1	0	0	0	0	0	0	0	0	0	0	0	0	0	1
1581	7	1	A only	0	1	0	1	0	0	0	0	0	0	0	0	0	0	0	0	0	1
1582	7	1	A only	0	0	0	0	0	0	0	1	0	0	0	0	0	0	0	0	1	1
1583	7	2	A only	1	0	0	1	0	0	0	0	0	0	0	0	0	0	0	0	0	1
1584	7	2	A only	1	0	0	1	0	0	0	0	0	0	0	0	0	0	0	0	0	1
1585	7	2	A only	1	0	0	1	0	0	0	0	0	0	0	0	0	0	0	0	0	1
1586	7	2	A only	1	0	0	1	0	0	0	0	0	0	0	0	0	0	0	0	0	1
1587	7	2	A only	0	1	0	1	0	0	0	0	0	0	0	0	0	0	0	0	0	1
1588	7	2	A only	0	0	0	0	0	0	0	0	0	0	0	0	0	0	0	0	0	0
1589	7	3	A only	0	1	0	1	0	0	0	0	0	0	0	0	0	0	0	0	0	1
1590	7	3	A only	0	1	0	1	0	0	0	0	0	0	0	0	0	0	0	0	0	1
1591	7	3	A only	0	1	0	1	0	0	0	0	0	0	0	0	0	0	0	0	0	1
1592	7	3	A only	0	1	0	1	0	0	0	0	0	0	0	0	0	0	0	0	0	1
1593	7	3	A only	0	1	0	1	0	0	0	0	0	0	0	0	0	0	0	0	0	1
1594	7	3	A only	0	0	0	0	0	0	0	0	0	0	0	0	0	0	0	0	0	0
1595	7	4	A only	0	0	0	0	0	0	0	1	0	0	0	0	0	0	0	0	1	1
1596	7	4	A only	1	0	0	1	0	0	0	0	0	0	0	0	0	0	0	0	0	1
1597	7	4	A only	0	0	0	0	0	0	0	1	0	0	0	0	0	0	0	0	1	1
1598	7	4	A only	1	0	0	1	0	0	0	0	0	0	0	0	0	0	0	0	0	1
1599	7	4	A only	0	1	0	1	0	0	0	0	0	0	0	0	0	0	0	0	0	1
1600	7	4	A only	0	1	0	1	0	0	0	0	0	0	0	0	0	0	0	0	0	1
1601	7	4	A only	0	0	0	0	0	0	0	1	0	0	0	0	0	0	0	0	1	1
1602	7	4	A only	0	1	0	1	0	0	0	0	0	0	0	0	0	0	0	0	0	1
1603	7	5	A only	1	0	0	1	0	0	0	0	0	0	0	0	0	0	0	0	0	1
1604	7	5	A only	0	1	0	1	0	0	0	0	0	0	0	0	0	0	0	0	0	1
1605	7	5	A only	0	1	0	1	0	0	0	0	0	0	0	0	0	0	0	0	0	1
1606	7	5	A only	0	0	0	0	0	0	0	0	1	0	0	0	0	0	0	0	1	1
1607	7	5	A only	0	1	0	1	0	0	0	0	0	0	0	0	0	0	0	0	0	1
1608	7	5	A only	0	1	0	1	0	0	0	0	0	0	0	0	0	0	0	0	0	1
1609	7	5	A only	0	1	0	1	0	0	0	0	0	0	0	0	0	0	0	0	0	1
1610	7	5	A only	0	1	0	1	0	0	0	0	0	0	0	0	0	0	0	0	0	1
1611	7	5	A only	0	1	0	1	0	0	0	0	0	0	0	0	0	0	0	0	0	1
1612	7	5	A only	0	1	0	1	0	0	0	0	0	0	0	0	0	0	0	0	0	1
1613	7	6	A only	0	0	0	0	0	0	0	1	0	0	0	0	0	0	0	0	1	1
1614	7	6	A only	1	0	0	1	0	0	0	0	0	0	0	0	0	0	0	0	0	1
1615	7	6	A only	1	0	0	1	0	0	0	0	0	0	0	0	0	0	0	0	0	1
1616	7	6	A only	1	0	0	1	0	0	0	0	0	0	0	0	0	0	0	0	0	1
1617	7	6	A only	1	0	0	1	0	0	0	0	0	0	0	0	0	0	0	0	0	1
1618	7	6	A only	0	1	0	1	0	0	0	0	0	0	0	0	0	0	0	0	0	1
1619	7	6	A only	0	1	0	1	0	0	0	0	0	0	0	0	0	0	0	0	0	1
1620	7	6	A only	0	1	0	1	0	0	0	0	0	0	0	0	0	0	0	0	0	1
1621	7	6	A only	0	1	0	1	0	0	0	0	0	0	0	0	0	0	0	0	0	1
1622	7	7	A only	0	0	0	0	0	0	0	0	0	0	0	0	0	0	0	0	0	0
1623	7	8	A only	0	0	0	0	0	0	0	0	0	0	0	0	0	0	0	0	0	0
1624	7	9	A only	1	0	0	1	0	0	0	0	0	0	0	0	0	0	0	0	0	1
1625	7	9	A only	0	1	0	1	0	0	0	0	0	0	0	0	0	0	0	0	0	1
1626	7	9	A only	0	1	0	1	0	0	0	0	0	0	0	0	0	0	0	0	0	1
1627	7	9	A only	0	1	0	1	0	0	0	0	0	0	0	0	0	0	0	0	0	1
1628	7	9	A only	0	1	0	1	0	0	0	0	0	0	0	0	0	0	0	0	0	1
1629	7	9	A only	0	1	0	1	0	0	0	0	0	0	0	0	0	0	0	0	0	1
1630	7	9	A only	0	1	0	1	0	0	0	0	0	0	0	0	0	0	0	0	0	1
1631	7	9	A only	0	1	0	1	0	0	0	0	0	0	0	0	0	0	0	0	0	1
1632	7	10	A only	0	0	0	0	0	0	0	0	0	0	0	0	0	0	0	0	0	0
1633	7	11	A only	0	0	0	0	0	0	0	0	0	0	0	0	0	0	0	0	0	0
1634	7	12	A only	0	0	0	0	0	0	0	0	0	0	0	0	0	0	0	0	0	0
1635	7	13	A only	0	0	0	0	0	0	0	0	0	0	0	0	0	0	0	0	0	0
1636	7	13	A only	0	0	0	0	0	0	0	0	0	0	0	0	0	0	0	0	0	0
1637	7	14	A only	1	0	0	1	0	0	0	0	0	0	0	0	0	0	0	0	0	1
1638	7	14	A only	0	0	0	0	0	0	0	0	0	0	0	0	0	0	0	0	0	0
1639	7	15	A only	0	0	0	0	0	0	0	1	0	0	0	0	0	0	0	0	1	1
1640	7	15	A only	0	0	0	0	0	0	0	0	0	0	0	0	0	0	0	0	0	0
1641	7	16	A only	0	0	0	0	0	0	0	0	0	0	0	0	0	0	0	0	0	0
1642	7	17	A only	0	0	0	0	0	0	0	0	0	0	0	0	0	0	0	0	0	0
1643	7	18	A only	0	0	0	0	0	0	0	0	0	0	0	0	0	0	0	0	0	0
1644	7	18	A only	1	0	0	1	0	0	0	0	0	0	0	0	0	0	0	0	0	1
1645	7	18	A only	1	0	0	1	0	0	0	0	0	0	0	0	0	0	0	0	0	1
1646	7	18	A only	0	0	0	0	0	0	0	0	0	0	0	0	0	0	0	0	0	0
1647	7	18	A only	0	1	0	1	0	0	0	0	0	0	0	0	0	0	0	0	0	1
1648	7	18	A only	0	0	0	0	0	0	0	0	1	0	0	0	0	0	0	0	1	1
1649	7	18	A only	0	1	0	1	0	0	0	0	0	0	0	0	0	0	0	0	0	1
1650	7	18	A only	0	0	0	0	0	0	0	0	0	0	0	0	0	0	0	0	0	0
1651	7	19	A only	0	0	0	0	0	0	0	0	0	0	0	0	0	0	0	0	0	0
1652	7	20	A only	0	0	0	0	0	0	0	0	0	1	0	0	0	0	0	0	1	1
1653	7	21	A only	0	0	0	0	0	0	0	0	0	0	0	0	0	0	0	0	0	0
1654	7	22	A only	0	0	0	0	0	0	0	0	0	0	0	0	0	0	0	0	0	0
1655	7	23	A only	0	0	0	0	0	0	0	0	0	0	0	0	0	0	0	0	0	0
1656	6	1	A only	0	0	0	0	0	0	0	0	0	0	0	0	0	0	0	0	0	0
1657	6	2	A only	0	0	0	0	0	0	0	0	0	0	0	0	0	0	0	0	0	0
1658	6	3	A only	1	0	0	1	0	0	0	0	0	0	0	0	0	0	0	0	0	1
1659	6	3	A only	1	0	0	1	0	0	0	0	0	0	0	0	0	0	0	0	0	1
1660	6	3	A only	1	0	0	1	0	0	0	0	0	0	0	0	0	0	0	0	0	1
1661	6	3	A only	1	0	0	1	0	0	0	0	0	0	0	0	0	0	0	0	0	1
1662	6	3	A only	1	0	0	1	0	0	0	0	0	0	0	0	0	0	0	0	0	1
1663	6	3	A only	0	1	0	1	0	0	0	0	0	0	0	0	0	0	0	0	0	1
1664	6	3	A only	0	0	0	0	0	0	0	0	0	0	0	0	0	0	0	1	1	1
1665	6	3	A only	0	0	0	0	0	0	0	1	0	0	0	0	0	0	0	0	1	1
1666	6	3	A only	0	0	0	0	0	0	0	1	0	0	0	0	0	0	0	0	1	1
1667	6	3	A only	0	0	0	0	0	0	0	1	0	0	0	0	0	0	0	0	1	1
1668	6	4	A only	1	0	0	1	0	0	0	0	0	0	0	0	0	0	0	0	0	1
1669	6	4	A only	0	1	0	1	0	0	0	0	0	0	0	0	0	0	0	0	0	1
1670	6	4	A only	0	1	0	1	0	0	0	0	0	0	0	0	0	0	0	0	0	1
1671	6	4	A only	0	1	0	1	0	0	0	0	0	0	0	0	0	0	0	0	0	1
1672	6	4	A only	0	1	0	1	0	0	0	0	0	0	0	0	0	0	0	0	0	1
1673	6	4	A only	0	1	0	1	0	0	0	0	0	0	0	0	0	0	0	0	0	1
1674	6	4	A only	0	1	0	1	0	0	0	0	0	0	0	0	0	0	0	0	0	1
1675	6	4	A only	0	1	0	1	0	0	0	0	0	0	0	0	0	0	0	0	0	1
1676	6	4	A only	0	1	0	1	0	0	0	0	0	0	0	0	0	0	0	0	0	1
1677	6	4	A only	0	1	0	1	0	0	0	0	0	0	0	0	0	0	0	0	0	1
1678	6	4	A only	0	1	0	1	0	0	0	0	0	0	0	0	0	0	0	0	0	1
1679	6	5	A only	1	0	0	1	0	0	0	0	0	0	0	0	0	0	0	0	0	1
1680	6	5	A only	1	0	0	1	0	0	0	0	0	0	0	0	0	0	0	0	0	1
1681	6	5	A only	1	0	0	1	0	0	0	0	0	0	0	0	0	0	0	0	0	1
1682	6	5	A only	1	0	0	1	0	0	0	0	0	0	0	0	0	0	0	0	0	1
1683	6	5	A only	0	0	0	0	0	0	0	0	1	0	0	0	0	0	0	0	1	1
1684	6	6	A only	0	0	0	0	0	0	0	0	0	0	0	0	0	0	0	0	0	0
1685	6	6	A only	0	0	0	0	0	0	0	0	0	0	0	0	0	0	0	0	0	0
1686	6	7	A only	0	0	0	0	0	0	0	0	0	0	0	0	0	0	0	0	0	0
1687	6	7	A only	0	0	0	0	0	0	0	0	0	0	0	0	0	0	0	0	0	0
1688	6	8	A only	0	0	0	0	0	0	0	0	0	0	0	0	0	0	0	0	0	0
1689	6	9	A only	1	0	0	1	0	0	0	0	0	0	0	0	0	0	0	0	0	1
1690	6	9	A only	1	0	0	1	0	0	0	0	0	0	0	0	0	0	0	0	0	1
1691	6	9	A only	1	0	0	1	0	0	0	0	0	0	0	0	0	0	0	0	0	1
1692	6	9	A only	0	1	0	1	0	0	0	0	0	0	0	0	0	0	0	0	0	1
1693	6	9	A only	0	0	0	0	0	0	0	0	0	0	0	0	0	0	0	0	0	0
1694	6	10	A only	0	0	0	0	0	0	0	0	0	0	0	0	0	0	0	0	0	0
1695	6	10	A only	1	0	0	1	0	0	0	0	0	0	0	0	0	0	0	0	0	1
1696	6	10	A only	1	0	0	1	0	0	0	0	0	0	0	0	0	0	0	0	0	1
1697	6	10	A only	1	0	0	1	0	0	0	0	0	0	0	0	0	0	0	0	0	1
1698	6	10	A only	0	1	0	1	0	0	0	0	0	0	0	0	0	0	0	0	0	1
1699	6	10	A only	0	1	0	1	0	0	0	0	0	0	0	0	0	0	0	0	0	1
1700	6	10	A only	0	1	0	1	0	0	0	0	0	0	0	0	0	0	0	0	0	1
1701	6	10	A only	0	1	0	1	0	0	0	0	0	0	0	0	0	0	0	0	0	1
1702	6	11	A only	1	0	0	1	0	0	0	0	0	0	0	0	0	0	0	0	0	1
1703	6	11	A only	1	0	0	1	0	0	0	0	0	0	0	0	0	0	0	0	0	1
1704	6	12	A only	0	0	0	0	0	0	0	0	0	0	0	0	0	0	0	0	0	0
1705	6	12	A only	0	0	0	0	0	0	0	0	0	0	0	0	0	0	0	0	0	0
1706	6	13	A only	0	0	0	0	0	0	0	0	0	0	0	0	0	0	0	0	0	0
1707	6	13	A only	0	0	0	0	0	0	0	0	0	0	0	0	0	0	0	0	0	0
1708	6	14	A only	0	0	0	0	0	0	0	0	0	0	0	0	0	0	0	0	0	0
1709	6	15	A only	0	0	0	0	0	0	0	1	0	0	0	0	0	0	0	0	1	1
1710	6	15	A only	0	0	0	0	0	0	0	0	0	0	0	0	0	0	0	0	0	0
1711	6	16	A only	1	0	0	1	0	0	0	0	0	0	0	0	0	0	0	0	0	1
1712	6	16	A only	0	0	0	0	0	0	0	0	0	0	0	0	0	0	0	0	0	0
1713	6	17	A only	0	1	0	1	0	0	0	0	0	0	0	0	0	0	0	0	0	1
1714	6	17	A only	1	0	0	1	0	0	0	0	0	0	0	0	0	0	0	0	0	1
1715	6	17	A only	1	0	0	1	0	0	0	0	0	0	0	0	0	0	0	0	0	1
1716	6	17	A only	0	1	0	1	0	0	0	0	0	0	0	0	0	0	0	0	0	1
1717	6	17	A only	0	1	0	1	0	0	0	0	0	0	0	0	0	0	0	0	0	1
1718	6	17	A only	0	1	0	1	0	0	0	0	0	0	0	0	0	0	0	0	0	1
1719	6	17	A only	0	1	0	1	0	0	0	0	0	0	0	0	0	0	0	0	0	1
1720	6	17	A only	0	1	0	1	0	0	0	0	0	0	0	0	0	0	0	0	0	1
1721	6	17	A only	0	1	0	1	0	0	0	0	0	0	0	0	0	0	0	0	0	1
1722	6	17	A only	0	0	0	0	0	0	0	0	0	0	0	0	0	0	0	0	0	0
1723	6	18	A only	0	0	0	0	0	0	0	0	0	0	0	0	0	0	0	0	0	0
1725	6	20	A only	0	0	0	0	0	0	0	0	0	0	0	0	0	0	0	0	0	0
1726	6	20	A only	0	0	0	0	0	0	0	0	1	0	0	0	0	0	0	0	1	1
1727	6	20	A only	0	1	0	1	0	0	0	0	0	0	0	0	0	0	0	0	0	1
1728	6	20	A only	0	1	0	1	0	0	0	0	0	0	0	0	0	0	0	0	0	1
1729	6	20	A only	0	0	0	0	0	0	0	0	1	0	0	0	0	0	0	0	1	1
1730	6	20	A only	0	1	0	1	0	0	0	0	0	0	0	0	0	0	0	0	0	1
1731	6	20	A only	0	1	0	1	0	0	0	0	0	0	0	0	0	0	0	0	0	1
1732	6	20	A only	0	1	0	1	0	0	0	0	0	0	0	0	0	0	0	0	0	1
1733	6	20	A only	0	1	0	1	0	0	0	0	0	0	0	0	0	0	0	0	0	1
1734	6	21	A only	1	0	0	1	0	0	0	0	0	0	0	0	0	0	0	0	0	1
1735	6	21	A only	1	0	0	1	0	0	0	0	0	0	0	0	0	0	0	0	0	1
1736	6	21	A only	1	0	0	1	0	0	0	0	0	0	0	0	0	0	0	0	0	1
1737	6	21	A only	1	0	0	1	0	0	0	0	0	0	0	0	0	0	0	0	0	1
1738	6	21	A only	0	0	0	0	0	0	0	0	1	0	0	0	0	0	0	0	1	1
1739	6	21	A only	0	1	0	1	0	0	0	0	0	0	0	0	0	0	0	0	0	1
1740	6	21	A only	0	1	0	1	0	0	0	0	0	0	0	0	0	0	0	0	0	1
1741	6	21	A only	0	1	0	1	0	0	0	0	0	0	0	0	0	0	0	0	0	1
1742	6	21	A only	0	0	0	0	0	0	0	0	0	0	0	0	0	0	0	0	0	0
1743	5	1	A + WF	1	0	0	1	0	0	0	0	0	0	0	0	0	0	0	0	0	1
1744	5	1	A + WF	0	1	0	1	0	0	0	0	0	0	0	0	0	0	0	0	0	1
1745	5	1	A + WF	0	0	0	0	0	0	0	0	0	0	0	0	0	0	0	0	0	0
1746	5	2	A + WF	0	0	0	0	0	0	0	0	0	0	0	0	0	0	0	1	1	1
1747	5	2	A + WF	1	0	0	1	0	0	0	0	0	0	0	0	0	0	0	0	0	1
1748	5	2	A + WF	1	0	0	1	0	0	0	0	0	0	0	0	0	0	0	0	0	1
1749	5	2	A + WF	0	1	0	1	0	0	0	0	0	0	0	0	0	0	0	0	0	1
1750	5	2	A + WF	0	1	0	1	0	0	0	0	0	0	0	0	0	0	0	0	0	1
1751	5	2	A + WF	0	0	0	0	0	0	0	0	1	0	0	0	0	0	0	0	1	1
1752	5	3	A + WF	1	0	0	1	0	0	0	0	0	0	0	0	0	0	0	0	0	1
1753	5	3	A + WF	1	0	0	1	0	0	0	0	0	0	0	0	0	0	0	0	0	1
1754	5	3	A + WF	0	1	0	1	0	0	0	0	0	0	0	0	0	0	0	0	0	1
1755	5	3	A + WF	0	0	0	0	0	0	0	0	0	1	0	0	0	0	0	0	1	1
1756	5	3	A + WF	0	0	0	0	0	0	0	0	0	1	0	0	0	0	0	0	1	1
1757	5	3	A + WF	0	1	0	1	0	0	0	0	0	0	0	0	0	0	0	0	0	1
1758	5	3	A + WF	0	1	0	1	0	0	0	0	0	0	0	0	0	0	0	0	0	1
1759	5	3	A + WF	0	1	0	1	0	0	0	0	0	0	0	0	0	0	0	0	0	1
1760	5	4	A + WF	1	0	0	1	0	0	0	0	0	0	0	0	0	0	0	0	0	1
1761	5	4	A + WF	1	0	0	1	0	0	0	0	0	0	0	0	0	0	0	0	0	1
1762	5	4	A + WF	1	0	0	1	0	0	0	0	0	0	0	0	0	0	0	0	0	1
1763	5	4	A + WF	0	1	0	1	0	0	0	0	0	0	0	0	0	0	0	0	0	1
1764	5	4	A + WF	0	1	0	1	0	0	0	0	0	0	0	0	0	0	0	0	0	1
1765	5	4	A + WF	0	1	0	1	0	0	0	0	0	0	0	0	0	0	0	0	0	1
1766	5	4	A + WF	0	0	0	0	0	0	0	0	1	0	0	0	0	0	0	0	1	1
1767	5	4	A + WF	0	0	0	0	0	0	0	0	1	0	0	0	0	0	0	0	1	1
1768	5	4	A + WF	0	1	0	1	0	0	0	0	0	0	0	0	0	0	0	0	0	1
1769	5	4	A + WF	0	1	0	1	0	0	0	0	0	0	0	0	0	0	0	0	0	1
1770	5	5	A + WF	0	0	0	0	0	0	0	1	0	0	0	0	0	0	0	0	1	1
1771	5	5	A + WF	1	0	0	1	0	0	0	0	0	0	0	0	0	0	0	0	0	1
1772	5	5	A + WF	1	0	0	1	0	0	0	0	0	0	0	0	0	0	0	0	0	1
1773	5	5	A + WF	0	0	0	0	0	0	0	0	0	0	0	0	0	0	0	0	0	0
1774	5	5	A + WF	0	0	0	0	0	0	0	0	0	0	0	0	0	0	0	0	0	0
1775	5	6	A + WF	1	0	0	1	0	0	0	0	0	0	0	0	0	0	0	0	0	1
1776	5	6	A + WF	1	0	0	1	0	0	0	0	0	0	0	0	0	0	0	0	0	1
1777	5	6	A + WF	0	1	0	1	0	0	0	0	0	0	0	0	0	0	0	0	0	1
1778	5	6	A + WF	1	0	0	1	0	0	0	0	0	0	0	0	0	0	0	0	0	1
1779	5	6	A + WF	0	1	0	1	0	0	0	0	0	0	0	0	0	0	0	0	0	1
1780	5	6	A + WF	0	1	0	1	0	0	0	0	0	0	0	0	0	0	0	0	0	1
1781	5	6	A + WF	0	1	0	1	0	0	0	0	0	0	0	0	0	0	0	0	0	1
1782	5	6	A + WF	0	1	0	1	0	0	0	0	0	0	0	0	0	0	0	0	0	1
1783	5	6	A + WF	0	1	0	1	0	0	0	0	0	0	0	0	0	0	0	0	0	1
1784	5	6	A + WF	0	1	0	1	0	0	0	0	0	0	0	0	0	0	0	0	0	1
1785	5	6	A + WF	0	1	0	1	0	0	0	0	0	0	0	0	0	0	0	0	0	1
1786	5	7	A + WF	1	0	0	1	0	0	0	0	0	0	0	0	0	0	0	0	0	1
1787	5	7	A + WF	1	0	0	1	0	0	0	0	0	0	0	0	0	0	0	0	0	1
1788	5	7	A + WF	1	0	0	1	0	0	0	0	0	0	0	0	0	0	0	0	0	1
1789	5	7	A + WF	0	1	0	1	0	0	0	0	0	0	0	0	0	0	0	0	0	1
1790	5	7	A + WF	0	1	0	1	0	0	0	0	0	0	0	0	0	0	0	0	0	1
1791	5	7	A + WF	0	1	0	1	0	0	0	0	0	0	0	0	0	0	0	0	0	1
1792	5	7	A + WF	0	1	0	1	0	0	0	0	0	0	0	0	0	0	0	0	0	1
1793	5	7	A + WF	0	1	0	1	0	0	0	0	0	0	0	0	0	0	0	0	0	1
1794	5	7	A + WF	0	1	0	1	0	0	0	0	0	0	0	0	0	0	0	0	0	1
1795	5	8	A + WF	1	0	0	1	0	0	0	0	0	0	0	0	0	0	0	0	0	1
1796	5	8	A + WF	1	0	0	1	0	0	0	0	0	0	0	0	0	0	0	0	0	1
1797	5	8	A + WF	1	0	0	1	0	0	0	0	0	0	0	0	0	0	0	0	0	1
1798	5	8	A + WF	0	0	0	0	0	0	0	1	0	0	0	0	0	0	0	0	1	1
1799	5	8	A + WF	0	1	0	1	0	0	0	0	0	0	0	0	0	0	0	0	0	1
1800	5	8	A + WF	0	0	0	0	0	0	0	0	0	0	0	0	0	0	0	1	1	1
1801	5	8	A + WF	0	0	0	0	0	0	0	1	0	0	0	0	0	0	0	0	1	1
1802	5	8	A + WF	0	1	0	1	0	0	0	0	0	0	0	0	0	0	0	0	0	1
1803	5	8	A + WF	0	0	0	0	0	0	0	0	1	0	0	0	0	0	0	0	1	1
1804	5	9	A + WF	0	0	0	0	0	0	0	0	1	0	0	0	0	0	0	0	1	1
1805	5	9	A + WF	1	0	0	1	0	0	0	0	0	0	0	0	0	0	0	0	0	1
1806	5	9	A + WF	0	0	0	0	0	0	0	0	0	0	0	0	0	0	0	0	0	0
1807	5	10	A + WF	0	0	1	0	0	0	0	0	0	0	0	0	0	0	0	0	1	1
1808	5	10	A + WF	1	0	0	1	0	0	0	0	0	0	0	0	0	0	0	0	0	1
1809	5	10	A + WF	0	1	0	1	0	0	0	0	0	0	0	0	0	0	0	0	0	1
1810	5	10	A + WF	0	0	0	0	0	0	0	1	0	0	0	0	0	0	0	0	1	1
1811	5	10	A + WF	0	1	0	1	0	0	0	0	0	0	0	0	0	0	0	0	0	1
1812	5	10	A + WF	0	1	0	1	0	0	0	0	0	0	0	0	0	0	0	0	0	1
1813	5	10	A + WF	0	1	0	1	0	0	0	0	0	0	0	0	0	0	0	0	0	1
1814	5	10	A + WF	0	1	0	1	0	0	0	0	0	0	0	0	0	0	0	0	0	1
1815	5	10	A + WF	0	1	0	1	0	0	0	0	0	0	0	0	0	0	0	0	0	1
1816	5	11	A + WF	0	0	0	0	0	0	0	0	0	0	0	0	0	0	0	0	0	0
1817	5	12	A + WF	0	0	0	0	0	0	0	0	0	0	0	0	0	0	0	0	0	0
1818	5	13	A + WF	0	1	0	1	0	0	0	0	0	0	0	0	0	0	0	0	0	1
1819	5	13	A + WF	0	1	0	1	0	0	0	0	0	0	0	0	0	0	0	0	0	1
1820	5	13	A + WF	0	1	0	1	0	0	0	0	0	0	0	0	0	0	0	0	0	1
1821	5	13	A + WF	0	0	0	0	0	0	0	0	0	0	0	0	0	0	0	0	0	0
1822	5	14	A + WF	0	0	0	0	0	0	0	1	0	0	0	0	0	0	0	0	1	1
1823	5	14	A + WF	0	0	0	0	0	0	0	1	0	0	0	0	0	0	0	0	1	1
1824	5	14	A + WF	0	1	0	1	0	0	0	0	0	0	0	0	0	0	0	0	0	1
1825	5	14	A + WF	0	1	0	1	0	0	0	0	0	0	0	0	0	0	0	0	0	1
1826	5	14	A + WF	0	1	0	1	0	0	0	0	0	0	0	0	0	0	0	0	0	1
1827	5	14	A + WF	0	1	0	1	0	0	0	0	0	0	0	0	0	0	0	0	0	1
1828	5	14	A + WF	0	0	0	0	0	0	0	0	1	0	0	0	0	0	0	0	1	1
1829	5	14	A + WF	0	1	0	1	0	0	0	0	0	0	0	0	0	0	0	0	0	1
1830	5	14	A + WF	0	1	0	1	0	0	0	0	0	0	0	0	0	0	0	0	0	1
1831	5	15	A + WF	1	0	0	1	0	0	0	0	0	0	0	0	0	0	0	0	0	1
1832	5	15	A + WF	1	0	0	1	0	0	0	0	0	0	0	0	0	0	0	0	0	1
1833	5	15	A + WF	1	0	0	1	0	0	0	0	0	0	0	0	0	0	0	0	0	1
1834	5	15	A + WF	1	0	0	1	0	0	0	0	0	0	0	0	0	0	0	0	0	1
1835	5	15	A + WF	0	1	0	1	0	0	0	0	0	0	0	0	0	0	0	0	0	1
1836	5	15	A + WF	0	0	0	0	0	0	0	0	1	0	0	0	0	0	0	0	1	1
1837	5	15	A + WF	0	1	0	1	0	0	0	0	0	0	0	0	0	0	0	0	0	1
1838	5	15	A + WF	0	1	0	1	0	0	0	0	0	0	0	0	0	0	0	0	0	1
1839	5	15	A + WF	0	0	0	0	0	0	0	0	0	0	0	0	0	0	0	0	0	0
1840	5	15	A + WF	0	0	0	0	0	0	0	0	0	0	0	0	0	0	0	0	0	0
1841	5	16	A + WF	1	0	0	1	0	0	0	0	0	0	0	0	0	0	0	0	0	1
1842	5	16	A + WF	0	0	0	0	0	0	0	0	0	0	0	1	1	0	0	0	1	1
1843	5	16	A + WF	1	0	0	1	0	0	0	0	0	0	0	0	0	0	0	0	0	1
1844	5	16	A + WF	1	0	0	1	0	0	0	0	0	0	0	0	0	0	0	0	0	1
1845	5	16	A + WF	0	1	0	1	0	0	0	0	0	0	0	0	0	0	0	0	0	1
1846	5	16	A + WF	0	0	0	0	0	0	0	0	1	0	0	0	0	0	0	0	1	1
1847	5	16	A + WF	0	0	0	0	0	0	0	0	1	0	0	0	0	0	0	0	1	1
1848	5	16	A + WF	0	0	0	0	0	0	0	0	0	1	0	0	0	0	0	0	1	1
1849	5	16	A + WF	0	1	0	1	0	0	0	0	0	0	0	0	0	0	0	0	0	1
1850	5	16	A + WF	0	1	0	1	0	0	0	0	0	0	0	0	0	0	0	0	0	1
1851	5	16	A + WF	0	0	0	0	0	0	0	0	1	0	0	0	0	0	0	0	1	1
1852	5	17	A + WF	0	1	0	1	0	0	0	0	0	0	0	0	0	0	0	0	0	1
1853	5	17	A + WF	0	1	0	1	0	0	0	0	0	0	0	0	0	0	0	0	0	1
1854	5	17	A + WF	0	1	0	1	0	0	0	0	0	0	0	0	0	0	0	0	0	1
1855	5	17	A + WF	0	1	0	1	0	0	0	0	0	0	0	0	0	0	0	0	0	1
1856	5	17	A + WF	0	0	0	0	0	0	0	0	1	0	0	0	0	0	0	0	1	1
1857	5	17	A + WF	0	1	0	1	0	0	0	0	0	0	0	0	0	0	0	0	0	1
1858	5	17	A + WF	0	0	0	0	0	0	0	0	0	1	0	0	0	0	0	0	1	1
1859	5	17	A + WF	0	1	0	1	0	0	0	0	0	0	0	0	0	0	0	0	0	1
1860	5	17	A + WF	0	0	0	0	0	0	0	0	1	0	0	0	0	0	0	0	1	1
1861	5	17	A + WF	0	1	0	1	0	0	0	0	0	0	0	0	0	0	0	0	0	1
1862	5	18	A + WF	0	0	0	0	0	0	0	0	0	1	0	0	0	0	0	0	1	1
1863	5	18	A + WF	0	0	0	0	0	0	0	0	0	1	0	0	0	0	0	0	1	1
1864	5	18	A + WF	0	0	0	0	0	0	0	0	0	1	0	0	0	0	0	0	1	1
1865	5	18	A + WF	0	0	0	0	0	0	0	0	1	0	0	0	0	0	0	0	1	1
1866	5	18	A + WF	0	1	0	1	0	0	0	0	0	0	0	0	0	0	0	0	0	1
1867	5	18	A + WF	0	1	0	1	0	0	0	0	0	0	0	0	0	0	0	0	0	1
1868	5	18	A + WF	0	1	0	1	0	0	0	0	0	0	0	0	0	0	0	0	0	1
1869	5	18	A + WF	0	1	0	1	0	0	0	0	0	0	0	0	0	0	0	0	0	1
1870	5	18	A + WF	0	0	0	0	0	0	0	0	0	0	0	0	0	0	0	1	1	1
1871	5	18	A + WF	0	1	0	1	0	0	0	0	0	0	0	0	0	0	0	0	0	1
1872	5	18	A + WF	0	0	0	0	0	0	0	1	0	0	0	0	0	0	0	0	1	1
1873	5	19	A + WF	0	0	0	0	0	0	0	0	1	0	0	0	0	0	0	0	1	1
1874	5	19	A + WF	0	1	0	1	0	0	0	0	0	0	0	0	0	0	0	0	0	1
1875	5	19	A + WF	0	0	0	0	0	0	0	0	1	0	0	0	0	0	0	0	1	1
1876	5	19	A + WF	0	0	0	0	0	0	0	0	0	1	0	0	0	0	0	0	1	1
1877	5	19	A + WF	0	0	0	0	0	0	0	0	0	1	0	0	0	0	0	0	1	1
1878	5	19	A + WF	0	1	0	1	0	0	0	0	0	0	0	0	0	0	0	0	0	1
1879	5	19	A + WF	0	1	0	1	0	0	0	0	0	0	0	0	0	0	0	0	0	1
1880	5	19	A + WF	0	0	0	0	0	0	0	0	0	1	0	0	0	0	0	0	1	1
1881	5	19	A + WF	0	0	0	0	0	0	0	0	1	0	0	0	0	0	0	0	1	1
1882	5	19	A + WF	0	0	0	0	0	0	0	0	1	0	0	0	0	0	0	0	1	1
1883	5	20	A + WF	0	0	0	0	0	0	0	0	0	0	0	0	0	0	0	0	0	0
1884	5	21	A + WF	0	0	0	0	1	0	0	0	0	0	0	0	0	0	0	0	1	1
1885	5	21	A + WF	0	0	0	0	0	0	0	1	0	0	0	0	0	0	0	0	1	1
1886	5	21	A + WF	0	0	0	0	0	0	0	0	0	1	0	0	0	0	0	0	1	1
1887	5	21	A + WF	0	1	0	1	0	0	0	0	0	0	0	0	0	0	0	0	0	1
1888	5	21	A + WF	0	0	0	0	0	0	0	0	1	0	0	0	0	0	0	0	1	1
1889	5	21	A + WF	0	1	0	1	0	0	0	0	0	0	0	0	0	0	0	0	0	1
1890	5	21	A + WF	0	1	0	1	0	0	0	0	0	0	0	0	0	0	0	0	0	1
1891	5	21	A + WF	0	1	0	1	0	0	0	0	0	0	0	0	0	0	0	0	0	1
1892	5	21	A + WF	0	1	0	1	0	0	0	0	0	0	0	0	0	0	0	0	0	1
1893	5	21	A + WF	0	1	0	1	0	0	0	0	0	0	0	0	0	0	0	0	0	1
1894	5	21	A + WF	0	1	0	1	0	0	0	0	0	0	0	0	0	0	0	0	0	1
1895	4	1	WF only	0	0	0	0	0	0	0	0	0	0	0	0	0	0	0	0	0	0
1896	4	2	WF only	0	0	0	0	0	0	0	0	0	0	0	0	0	0	0	0	0	0
1897	4	3	WF only	1	0	0	1	0	0	0	0	0	0	0	0	0	0	0	0	0	1
1898	4	3	WF only	0	1	0	1	0	0	0	0	0	0	0	0	0	0	0	0	0	1
1899	4	3	WF only	0	1	0	1	0	0	0	0	0	0	0	0	0	0	0	0	0	1
1900	4	3	WF only	0	1	0	1	0	0	0	0	0	0	0	0	0	0	0	0	0	1
1901	4	4	WF only	1	0	0	1	0	0	0	0	0	0	0	0	0	0	0	0	0	1
1902	4	4	WF only	1	0	0	1	0	0	0	0	0	0	0	0	0	0	0	0	0	1
1903	4	4	WF only	0	1	0	1	0	0	0	0	0	0	0	0	0	0	0	0	0	1
1904	4	4	WF only	0	1	0	1	0	0	0	0	0	0	0	0	0	0	0	0	0	1
1905	4	4	WF only	0	1	0	1	0	0	0	0	0	0	0	0	0	0	0	0	0	1
1906	4	4	WF only	0	1	0	1	0	0	0	0	0	0	0	0	0	0	0	0	0	1
1907	4	4	WF only	0	1	0	1	0	0	0	0	0	0	0	0	0	0	0	0	0	1
1908	4	4	WF only	0	1	0	1	0	0	0	0	0	0	0	0	0	0	0	0	0	1
1909	4	4	WF only	0	1	0	1	0	0	0	0	0	0	0	0	0	0	0	0	0	1
1910	4	4	WF only	0	0	0	0	0	0	0	0	0	0	1	0	1	0	0	0	1	1
1911	4	5	WF only	0	1	0	1	0	0	0	0	0	0	0	0	0	0	0	0	0	1
1912	4	5	WF only	0	0	0	0	0	0	0	0	0	0	0	0	0	0	0	0	0	0
1913	4	6	WF only	0	0	0	0	0	0	0	1	0	0	0	0	0	0	0	0	1	1
1914	4	6	WF only	0	0	0	0	0	0	0	1	0	0	0	0	0	0	0	0	1	1
1915	4	6	WF only	1	0	0	1	0	0	0	0	0	0	0	0	0	0	0	0	0	1
1916	4	6	WF only	0	1	0	1	0	0	0	0	0	0	0	0	0	0	0	0	0	1
1917	4	6	WF only	0	1	0	1	0	0	0	0	0	0	0	0	0	0	0	0	0	1
1918	4	6	WF only	0	1	0	1	0	0	0	0	0	0	0	0	0	0	0	0	0	1
1919	4	6	WF only	0	1	0	1	0	0	0	0	0	0	0	0	0	0	0	0	0	1
1920	4	6	WF only	0	1	0	1	0	0	0	0	0	0	0	0	0	0	0	0	0	1
1921	4	6	WF only	0	1	0	1	0	0	0	0	0	0	0	0	0	0	0	0	0	1
1922	4	6	WF only	0	1	0	1	0	0	0	0	0	0	0	0	0	0	0	0	0	1
1923	4	7	WF only	1	0	0	1	0	0	0	0	0	0	0	0	0	0	0	0	0	1
1924	4	7	WF only	1	0	0	1	0	0	0	0	0	0	0	0	0	0	0	0	0	1
1925	4	7	WF only	1	0	0	1	0	0	0	0	0	0	0	0	0	0	0	0	0	1
1926	4	7	WF only	0	1	0	1	0	0	0	0	0	0	0	0	0	0	0	0	0	1
1927	4	7	WF only	0	1	0	1	0	0	0	0	0	0	0	0	0	0	0	0	0	1
1928	4	7	WF only	0	1	0	1	0	0	0	0	0	0	0	0	0	0	0	0	0	1
1929	4	7	WF only	0	1	0	1	0	0	0	0	0	0	0	0	0	0	0	0	0	1
1930	4	7	WF only	0	1	0	1	0	0	0	0	0	0	0	0	0	0	0	0	0	1
1931	4	7	WF only	0	1	0	1	0	0	0	0	0	0	0	0	0	0	0	0	0	1
1932	4	8	WF only	0	1	0	1	0	0	0	0	0	0	0	0	0	0	0	0	0	1
1933	4	8	WF only	1	0	0	1	0	0	0	0	0	0	0	0	0	0	0	0	0	1
1934	4	8	WF only	0	0	0	0	0	0	0	0	1	0	0	0	0	0	0	0	1	1
1935	4	8	WF only	1	0	0	1	0	0	0	0	0	0	0	0	0	0	0	0	0	1
1936	4	8	WF only	0	0	0	0	0	0	0	0	0	0	1	0	1	0	0	0	1	1
1937	4	8	WF only	0	1	0	1	0	0	0	0	0	0	0	0	0	0	0	0	0	1
1938	4	8	WF only	0	0	0	0	0	0	0	0	1	0	0	0	0	0	0	0	1	1
1939	4	8	WF only	0	1	0	1	0	0	0	0	0	0	0	0	0	0	0	0	0	1
1940	4	8	WF only	0	0	0	0	0	0	0	0	1	0	0	0	0	0	0	0	1	1
1941	4	8	WF only	0	1	0	1	0	0	0	0	0	0	0	0	0	0	0	0	0	1
1942	4	8	WF only	0	1	0	1	0	0	0	0	0	0	0	0	0	0	0	0	0	1
1943	4	9	WF only	0	0	0	0	0	0	0	1	0	0	0	0	0	0	0	0	1	1
1944	4	10	WF only	0	0	0	0	0	0	0	1	0	0	0	0	0	0	0	0	1	1
1945	4	11	WF only	0	0	0	0	0	0	0	0	0	0	0	0	0	0	0	0	0	0
1946	4	12	WF only	0	1	0	1	0	0	0	0	0	0	0	0	0	0	0	0	0	1
1947	4	12	WF only	0	0	0	0	0	0	0	0	0	0	0	0	0	0	0	0	0	0
1948	4	13	WF only	0	0	0	0	0	0	0	1	0	0	0	0	0	0	0	0	1	1
1949	4	14	WF only	1	0	0	1	0	0	0	0	0	0	0	0	0	0	0	0	0	1
1950	4	14	WF only	0	0	0	0	0	0	0	0	0	0	0	1	1	0	0	0	1	1
1951	4	14	WF only	1	0	0	1	0	0	0	0	0	0	0	0	0	0	0	0	0	1
1952	4	14	WF only	0	1	0	1	0	0	0	0	0	0	0	0	0	0	0	0	0	1
1953	4	14	WF only	0	0	0	0	0	0	0	1	0	0	0	0	0	0	0	0	1	1
1954	4	14	WF only	0	1	0	1	0	0	0	0	0	0	0	0	0	0	0	0	0	1
1955	4	14	WF only	0	1	0	1	0	0	0	0	0	0	0	0	0	0	0	0	0	1
1956	4	15	WF only	1	0	0	1	0	0	0	0	0	0	0	0	0	0	0	0	0	1
1957	4	15	WF only	0	0	0	0	0	0	0	0	1	0	0	0	0	0	0	0	1	1
1958	4	15	WF only	0	0	0	0	0	0	0	0	0	0	1	0	1	0	0	0	1	1
1959	4	15	WF only	0	0	0	0	0	0	0	0	1	0	0	0	0	0	0	0	1	1
1960	4	15	WF only	0	1	0	1	0	0	0	0	0	0	0	0	0	0	0	0	0	1
1961	4	15	WF only	0	1	0	1	0	0	0	0	0	0	0	0	0	0	0	0	0	1
1962	4	15	WF only	0	0	0	0	0	0	0	0	1	0	0	0	0	0	0	0	1	1
1963	4	15	WF only	0	0	0	0	0	0	0	0	1	0	0	0	0	0	0	0	1	1
1964	4	16	WF only	0	0	0	0	0	0	0	1	0	0	0	0	0	0	0	0	1	1
1965	4	17	WF only	0	1	0	1	0	0	0	0	0	0	0	0	0	0	0	0	0	1
1966	4	18	WF only	1	0	0	1	0	0	0	0	0	0	0	0	0	0	0	0	0	1
1967	4	18	WF only	0	1	0	1	0	0	0	0	0	0	0	0	0	0	0	0	0	1
1968	4	18	WF only	0	1	0	1	0	0	0	0	0	0	0	0	0	0	0	0	0	1
1969	4	18	WF only	0	1	0	1	0	0	0	0	0	0	0	0	0	0	0	0	0	1
1970	4	18	WF only	0	0	0	0	1	0	0	0	0	0	0	0	0	0	0	0	1	1
1971	4	18	WF only	0	0	0	0	0	0	0	0	1	0	0	0	0	0	0	0	1	1
1972	4	18	WF only	0	1	0	1	0	0	0	0	0	0	0	0	0	0	0	0	0	1
1973	4	19	WF only	0	0	0	0	1	0	0	0	0	0	0	0	0	0	0	0	1	1
1974	4	19	WF only	0	0	0	0	0	0	0	0	0	0	0	1	1	0	0	0	1	1
1975	4	19	WF only	0	0	0	0	0	0	0	0	1	0	0	0	0	0	0	0	1	1
1976	4	19	WF only	0	1	0	1	0	0	0	0	0	0	0	0	0	0	0	0	0	1
1977	4	19	WF only	0	0	0	0	0	0	0	0	0	1	0	0	0	0	0	0	1	1
1978	4	19	WF only	0	0	0	0	0	0	0	0	1	0	0	0	0	0	0	0	1	1
1979	4	19	WF only	0	0	0	0	1	0	0	0	0	0	0	0	0	0	0	0	1	1
1980	4	19	WF only	0	0	0	0	0	0	0	0	0	1	0	0	0	0	0	0	1	1
1981	4	19	WF only	0	1	0	1	0	0	0	0	0	0	0	0	0	0	0	0	0	1
1982	4	19	WF only	0	0	0	0	0	0	0	0	0	0	1	0	1	0	0	0	1	1
1983	4	19	WF only	0	0	0	0	0	0	0	1	0	0	0	0	0	0	0	0	1	1
1984	3	1	A + WF	0	0	0	0	0	0	0	0	0	0	0	0	0	0	0	0	0	0
1985	3	2	A + WF	1	0	0	1	0	0	0	0	0	0	0	0	0	0	0	0	0	1
1986	3	2	A + WF	0	1	0	1	0	0	0	0	0	0	0	0	0	0	0	0	0	1
1987	3	2	A + WF	0	0	0	0	0	0	0	0	0	0	0	0	0	0	0	0	0	0
1988	3	3	A + WF	1	0	0	1	0	0	0	0	0	0	0	0	0	0	0	0	0	1
1989	3	3	A + WF	0	1	0	1	0	0	0	0	0	0	0	0	0	0	0	0	0	1
1990	3	3	A + WF	0	1	0	1	0	0	0	0	0	0	0	0	0	0	0	0	0	1
1991	3	3	A + WF	0	1	0	1	0	0	0	0	0	0	0	0	0	0	0	0	0	1
1992	3	3	A + WF	0	1	0	1	0	0	0	0	0	0	0	0	0	0	0	0	0	1
1993	3	3	A + WF	0	1	0	1	0	0	0	0	0	0	0	0	0	0	0	0	0	1
1994	3	3	A + WF	0	1	0	1	0	0	0	0	0	0	0	0	0	0	0	0	0	1
1995	3	3	A + WF	0	0	0	0	0	0	0	0	1	0	0	0	0	0	0	0	1	1
1996	3	3	A + WF	0	1	0	1	0	0	0	0	0	0	0	0	0	0	0	0	0	1
1997	3	3	A + WF	0	1	0	1	0	0	0	0	0	0	0	0	0	0	0	0	0	1
1998	3	4	A + WF	1	0	0	1	0	0	0	0	0	0	0	0	0	0	0	0	0	1
1999	3	4	A + WF	0	1	0	1	0	0	0	0	0	0	0	0	0	0	0	0	0	1
2000	3	4	A + WF	0	1	0	1	0	0	0	0	0	0	0	0	0	0	0	0	0	1
[truncated: 294 more rows]

## Sheet: offspring condition
vial no.	capsule no.	cage no.	nest no.	sex	treatment	initial body weight	final body weight	lipid mass (mg)	lipid mass (ug)	percent body lipids	proportion body lipids	head width (mm)
1199	1239	11	21	F	WF only	0.0105	0.0077	0.0028	28	26.6667	0.266667	2.64
1148	1443	9	19	F	A + WF	0.0066	0.0059	0.0007	7	10.6061	0.106061	2.52
1152	613	18	4	F	WF only	0.0077	0.007	0.0007	7	9.09091	0.0909091	2.68
1154	897	15	18	F	WF only	0.0091	0.0074	0.0017	17	18.6813	0.186813	2.72
1162	989	14	11	F	A + WF	0.0075	0.006	0.0015	15	20	0.2	2.52
1157	1332	9	3	F	A + WF	0.01	0.0088	0.0012	12	12	0.12	2.84024
1155	1523	8	7	F	WF only	0.0105	0.0091	0.0014	14	13.3333	0.133333	2.88
1160	1556	8	13	F	WF only	0.013	0.0114	0.0016	16	12.3077	0.123077	3.14908
1161	1557	8	13	F	WF only	0.0126	0.0108	0.0018	18	14.2857	0.142857	2.76
1153	1841	5	16	F	A + WF	0.0125	0.0105	0.002	20	16	0.16	3
1158	1949	4	14	F	WF only	0.0109	0.0098	0.0011	11	10.0917	0.100917	2.84
1150	1966	4	18	F	WF only	0.0091	0.0076	0.0015	15	16.4835	0.164835	2.72
1159	2078	3	19	F	A + WF	0.008	0.0061	0.0019	19	23.75	0.2375	2.68
1151	2220	1	1	F	WF only	0.0092	0.0083	0.0009	9	9.78261	0.0978261	2.68
1156	2226	1	2	F	WF only	0.0147	0.0125	0.0022	22	14.966	0.14966	3.23732
1149	2276	1	16	F	WF only	0.0066	0.0059	0.0007	7	10.6061	0.106061	2.32
1184	16	24	6	F	WF only	0.003	0.0024	0.0006	6	20	0.2	2.2
1205	167	22	7	F	A + WF	0.0129	0.0107	0.0022	22	17.0543	0.170543	2.9726
1203	177	22	8	F	A + WF	0.0153	0.0128	0.0025	25	16.3399	0.163399	3.24
1192	262	22	23	F	A + WF	0.0084	0.0069	0.0015	15	17.8571	0.178571	2.72
1168	305	22	30	F	A + WF	0.005	0.0032	0.0018	18	36	0.36	2.32
1175	469	19	2	F	A + WF	0.0113	0.0096	0.0017	17	15.0442	0.150442	2.92
1207	573	19	18	F	A + WF	0.0122	0.0097	0.0025	25	20.4918	0.204918	2.92
1191	612	18	4	F	WF only	0.011	0.0094	0.0016	16	14.5455	0.145455	2.9726
1179	639	18	10	F	WF only	0.0107	0.0098	0.0009	9	8.41121	0.0841121	2.96
1170	658	18	14	F	WF only	0.0101	0.0091	0.001	10	9.90099	0.0990099	2.8
1190	834	15	4	F	WF only	0.0107	0.0096	0.0011	11	10.2804	0.102804	2.92
1177	899	15	19	F	WF only	0.0041	0.0036	0.0005	5	12.1951	0.121951	2.28
1182	911	15	26	F	WF only	0.006	0.0045	0.0015	15	25	0.25	2.56
1195	955	14	7	F	A + WF	0.0122	0.0106	0.0016	16	13.1148	0.131148	3
1214	983	14	10	F	A + WF	0.0105	0.0085	0.002	20	19.0476	0.190476	2.84
1213	1000	14	14	F	A + WF	0.014	0.0115	0.0025	25	17.8571	0.178571	3.12
1186	1008	14	15	F	A + WF	0.0124	0.0109	0.0015	15	12.0968	0.120968	3.04
1198	1010	14	15	F	A + WF	0.0117	0.0093	0.0024	24	20.5128	0.205128	3
1194	1019	14	16	F	A + WF	0.0126	0.0104	0.0022	22	17.4603	0.174603	3.12
1212	1021	14	16	F	A + WF	0.0119	0.0099	0.002	20	16.8067	0.168067	3
1211	1022	14	16	F	A + WF	0.0136	0.0112	0.0024	24	17.6471	0.176471	3.08
1171	1072	13	13	F	A + WF	0.0124	0.011	0.0014	14	11.2903	0.112903	3
1215	1073	13	13	F	A + WF	0.0104	0.0086	0.0018	18	17.3077	0.173077	2.88
1164	1083	13	18	F	A + WF	0.0121	0.0103	0.0018	18	14.876	0.14876	3
1185	1086	13	18	F	A + WF	0.0108	0.0094	0.0014	14	12.963	0.12963	3
1209	1087	13	18	F	A + WF	0.0126	0.0104	0.0022	22	17.4603	0.174603	3.04
1210	1117	12	4	F	A + WF	0.0114	0.0093	0.0021	21	18.4211	0.184211	2.88
1201	1153	12	12	F	A + WF	0.0108	0.0094	0.0014	14	12.963	0.12963	2.88
1204	1222	11	20	F	WF only	0.0153	0.012	0.0033	33	21.5686	0.215686	3.16
1181	1223	11	20	F	WF only	0.0137	0.0117	0.002	20	14.5985	0.145985	3.14908
1173	1230	11	21	F	WF only	0.0126	0.0108	0.0018	18	14.2857	0.142857	3.10496
1193	1391	9	11	F	A + WF	0.0161	0.0132	0.0029	29	18.0124	0.180124	3.24
1172	1405	9	12	F	A + WF	0.0112	0.0094	0.0018	18	16.0714	0.160714	2.92
1188	1418	9	15	F	A + WF	0.0111	0.0098	0.0013	13	11.7117	0.117117	2.88
1187	1432	9	17	F	A + WF	0.0107	0.0096	0.0011	11	10.2804	0.102804	2.96
1180	1502	8	4	F	WF only	0.0126	0.0109	0.0017	17	13.4921	0.134921	3.08
1169	1513	8	6	F	WF only	0.0089	0.0081	0.0008	8	8.98876	0.0898876	2.84
1178	1521	8	7	F	WF only	0.0104	0.0092	0.0012	12	11.5385	0.115385	3
1174	1522	8	7	F	WF only	0.0094	0.008	0.0014	14	14.8936	0.148936	2.8
1189	1616	7	6	F	A only	0.0115	0.0092	0.0023	23	20	0.2	2.92
1206	1624	7	9	F	A only	0.0106	0.0091	0.0015	15	14.1509	0.141509	2.84024
1165	1637	7	14	F	A only	0.0052	0.0038	0.0014	14	26.9231	0.269231	2.44
1183	1644	7	18	F	A only	0.0066	0.0055	0.0011	11	16.6667	0.166667	2.52
1208	1753	5	3	F	A + WF	0.0152	0.0122	0.003	30	19.7368	0.197368	3.2
1166	1776	5	6	F	A + WF	0.0132	0.011	0.0022	22	16.6667	0.166667	3.04
1196	1833	5	15	F	A + WF	0.0142	0.0119	0.0023	23	16.1972	0.161972	3.12
1202	1844	5	16	F	A + WF	0.0143	0.0117	0.0026	26	18.1818	0.181818	3.10496
1200	1923	4	7	F	WF only	0.0157	0.0133	0.0024	24	15.2866	0.152866	3.28
1167	1935	4	8	F	WF only	0.0101	0.0091	0.001	10	9.90099	0.0990099	2.92
1176	1956	4	15	F	WF only	0.0122	0.0093	0.0029	29	23.7705	0.237705	3
1197	1988	3	3	F	A + WF	0.0136	0.0115	0.0021	21	15.4412	0.154412	3.08
1163	2278	1	17	F	WF only	0.0064	0.005	0.0014	14	21.875	0.21875	2.6
1248	12	24	4	F	WF only	0.0093	0.0078	0.0015	15	16.129	0.16129	2.88
1339	89	23	10	F	A only	0.0096	0.0078	0.0018	18	18.75	0.1875	2.76
1341	133	22	1	F	A + WF	0.0135	0.0113	0.0022	22	16.2963	0.162963	3.12
1347	149	22	4	F	A + WF	0.0104	0.0091	0.0013	13	12.5	0.125	2.96
1333	158	22	5	F	A + WF	0.0123	0.0097	0.0026	26	21.1382	0.211382	3.08
1242	168	22	7	F	A + WF	0.0117	0.0098	0.0019	19	16.2393	0.162393	3.01672
1223	170	22	7	F	A + WF	0.0103	0.0091	0.0012	12	11.6505	0.116505	2.88
1268	176	22	8	F	A + WF	0.0159	0.0129	0.003	30	18.8679	0.188679	3.28
1227	178	22	8	F	A + WF	0.0136	0.0116	0.002	20	14.7059	0.147059	3.2
1232	219	22	15	F	A + WF	0.0076	0.0058	0.0018	18	23.6842	0.236842	2.64
1241	220	22	15	F	A + WF	0.0088	0.008	0.0008	8	9.09091	0.0909091	2.76
1245	353	21	12	F	A only	0.0144	0.0123	0.0021	21	14.5833	0.145833	3.16
1256	377	21	22	F	A only	0.0131	0.0116	0.0015	15	11.4504	0.114504	3
1260	421	20	6	F	WF only	0.0072	0.0063	0.0009	9	12.5	0.125	2.56
1338	430	20	9	F	WF only	0.0131	0.0104	0.0027	27	20.6107	0.206107	3.12
1267	441	20	13	F	WF only	0.0174	0.0139	0.0035	35	20.1149	0.201149	3.32556
1272	442	20	13	F	WF only	0.0145	0.0123	0.0022	22	15.1724	0.151724	3.1932
1252	443	20	13	F	WF only	0.0145	0.012	0.0025	25	17.2414	0.172414	3.2
1334	574	19	18	F	A + WF	0.0138	0.0114	0.0024	24	17.3913	0.173913	3.12
1259	583	19	19	F	A + WF	0.0123	0.0105	0.0018	18	14.6341	0.146341	3.08
1254	585	19	19	F	A + WF	0.0146	0.0121	0.0025	25	17.1233	0.171233	3.2
1236	659	18	14	F	WF only	0.0119	0.0109	0.001	10	8.40336	0.0840336	3.04
1255	734	17	11	F	A only	0.0072	0.0056	0.0016	16	22.2222	0.222222	2.6
1348	761	16	6	F	A only	0.0147	0.011	0.0037	37	25.1701	0.251701	3.16
1340	792	16	10	F	A only	0.0119	0.0098	0.0021	21	17.6471	0.176471	3.04
1262	799	16	11	F	A only	0.0146	0.0107	0.0039	39	26.7123	0.267123	3.14908
1228	835	15	4	F	WF only	0.0116	0.01	0.0016	16	13.7931	0.137931	3.01672
1335	853	15	7	F	WF only	0.0067	0.0048	0.0019	19	28.3582	0.283582	2.52
1220	876	15	13	F	WF only	0.0123	0.0101	0.0022	22	17.8862	0.178862	2.9726
1269	877	15	13	F	WF only	0.0103	0.0091	0.0012	12	11.6505	0.116505	2.88
1251	882	15	14	F	WF only	0.0144	0.0117	0.0027	27	18.75	0.1875	3.12
1217	883	15	14	F	WF only	0.0146	0.0122	0.0024	24	16.4384	0.164384	3.23732
1346	884	15	14	F	WF only	0.0157	0.0124	0.0033	33	21.0191	0.210191	3.2
1270	913	15	27	F	WF only	0.0146	0.0113	0.0033	33	22.6027	0.226027	3.12
1332	965	14	8	F	A + WF	0.0132	0.0105	0.0027	27	20.4545	0.204545	3.10496
1244	998	14	14	F	A + WF	0.0125	0.0114	0.0011	11	8.8	0.088	3.08
1345	999	14	14	F	A + WF	0.0141	0.0121	0.002	20	14.1844	0.141844	3.2
1253	1020	14	16	F	A + WF	0.0137	0.0117	0.002	20	14.5985	0.145985	3.2
1235	1071	13	13	F	A + WF	0.0135	0.0116	0.0019	19	14.0741	0.140741	3.12
1239	1084	13	18	F	A + WF	0.0136	0.011	0.0026	26	19.1176	0.191176	3.08
1222	1088	13	18	F	A + WF	0.0121	0.01	0.0021	21	17.3554	0.173554	3.04
1247	1107	12	3	F	A + WF	0.0076	0.0057	0.0019	19	25	0.25	2.72
1271	1118	12	4	F	A + WF	0.013	0.0107	0.0023	23	17.6923	0.176923	3.04
1246	1299	10	21	F	A only	0.0112	0.0091	0.0021	21	18.75	0.1875	3
1336	1300	10	21	F	A only	0.0079	0.0056	0.0023	23	29.1139	0.291139	2.48
1343	1315	10	24	F	A only	0.013	0.01	0.003	30	23.0769	0.230769	3.08
1224	1331	9	3	F	A + WF	0.0133	0.0111	0.0022	22	16.5414	0.165414	3.04
1243	1373	9	9	F	A + WF	0.0107	0.0086	0.0021	21	19.6262	0.196262	2.92
1258	1393	9	11	F	A + WF	0.0143	0.012	0.0023	23	16.0839	0.160839	3.12
1240	1714	6	17	F	A only	0.0117	0.0093	0.0024	24	20.5128	0.205128	2.9726
1216	1715	6	17	F	A only	0.0117	0.0096	0.0021	21	17.9487	0.179487	2.92848
1237	1752	5	3	F	A + WF	0.0139	0.0106	0.0033	33	23.741	0.23741	3.12
1249	1760	5	4	F	A + WF	0.0138	0.0116	0.0022	22	15.942	0.15942	3.12
1337	1761	5	4	F	A + WF	0.0187	0.0147	0.004	40	21.3904	0.213904	3.4
1238	1762	5	4	F	A + WF	0.0147	0.012	0.0027	27	18.3673	0.183673	3.16
1261	1775	5	6	F	A + WF	0.0153	0.0118	0.0035	35	22.8758	0.228758	3.12
1230	1831	5	15	F	A + WF	0.012	0.0103	0.0017	17	14.1667	0.141667	3
1225	1832	5	15	F	A + WF	0.0133	0.0107	0.0026	26	19.5489	0.195489	3.08
1265	1834	5	15	F	A + WF	0.0122	0.0102	0.002	20	16.3934	0.163934	3.04
1266	1843	5	16	F	A + WF	0.0134	0.0107	0.0027	27	20.1493	0.201493	3.08
1221	1901	4	4	F	WF only	0.013	0.0114	0.0016	16	12.3077	0.123077	3.12
1219	1902	4	4	F	WF only	0.0129	0.0115	0.0014	14	10.8527	0.108527	3.10496
1234	1924	4	7	F	WF only	0.0146	0.0123	0.0023	23	15.7534	0.157534	3.23732
1250	1925	4	7	F	WF only	0.0149	0.0124	0.0025	25	16.7785	0.167785	3.1932
1218	2026	3	10	F	A + WF	0.0143	0.0116	0.0027	27	18.8811	0.188811	3.10496
1226	2067	3	17	F	A + WF	0.007	0.0059	0.0011	11	15.7143	0.157143	2.64
1257	2098	3	21	F	A + WF	0.015	0.0119	0.0031	31	20.6667	0.206667	3.1932
1264	2100	3	21	F	A + WF	0.0125	0.0104	0.0021	21	16.8	0.168	2.96
1342	2122	3	24	F	A + WF	0.0138	0.0111	0.0027	27	19.5652	0.195652	3.12
1263	2123	3	24	F	A + WF	0.015	0.0122	0.0028	28	18.6667	0.186667	3.16
1231	2219	1	1	F	WF only	0.0127	0.0108	0.0019	19	14.9606	0.149606	3.04
1344	2279	1	18	F	WF only	0.0119	0.0105	0.0014	14	11.7647	0.117647	3.04
1233	2280	1	18	F	WF only	0.012	0.0105	0.0015	15	12.5	0.125	3.06084
1229	2281	1	18	F	WF only	0.013	0.0106	0.0024	24	18.4615	0.184615	3.12
1295	94	23	10	F	A only	0.0142	0.0116	0.0026	26	18.3099	0.183099	3.08
1314	150	22	4	F	A + WF	0.0099	0.0081	0.0018	18	18.1818	0.181818	2.84
1371	157	22	5	F	A + WF	0.0112	0.0087	0.0025	25	22.3214	0.223214	2.96
1306	159	22	5	F	A + WF	0.0133	0.0102	0.0031	31	23.3083	0.233083	3.12
1278	169	22	7	F	A + WF	0.0119	0.01	0.0019	19	15.9664	0.159664	2.96
1299	212	22	12	F	A + WF	0.0112	0.0093	0.0019	19	16.9643	0.169643	2.92
1293	235	22	17	F	A + WF	0.0105	0.0088	0.0017	17	16.1905	0.161905	2.92
1283	314	21	2	F	A only	0.0135	0.0114	0.0021	21	15.5556	0.155556	3.12
1273	364	21	15	F	A only	0.0138	0.0116	0.0022	22	15.942	0.15942	3.12
1297	433	20	11	F	WF only	0.013	0.0108	0.0022	22	16.9231	0.169231	3.10496
1277	462	20	19	F	WF only	0.0119	0.0097	0.0022	22	18.4874	0.184874	2.92
1289	463	20	19	F	WF only	0.0137	0.0109	0.0028	28	20.438	0.20438	3.06084
1291	572	19	18	F	A + WF	0.0144	0.0126	0.0018	18	12.5	0.125	3.24
1285	660	18	14	F	WF only	0.0135	0.0115	0.002	20	14.8148	0.148148	3.12
1302	661	18	14	F	WF only	0.014	0.0118	0.0022	22	15.7143	0.157143	3.2
1313	741	16	3	F	A only	0.0148	0.0116	0.0032	32	21.6216	0.216216	3.12
1377	763	16	6	F	A only	0.0127	0.0097	0.003	30	23.622	0.23622	3.04
1376	766	16	7	F	A only	0.0147	0.0118	0.0029	29	19.7279	0.197279	3.2
1369	767	16	7	F	A only	0.014	0.0111	0.0029	29	20.7143	0.207143	3.16
1309	800	16	11	F	A only	0.0139	0.0114	0.0025	25	17.9856	0.179856	3.10496
1276	829	15	2	F	WF only	0.0114	0.0093	0.0021	21	18.4211	0.184211	2.92848
1372	982	14	10	F	A + WF	0.0105	0.0085	0.002	20	19.0476	0.190476	2.88
1274	1018	14	16	F	A + WF	0.011	0.0097	0.0013	13	11.8182	0.118182	2.96
1290	1029	14	17	F	A + WF	0.0126	0.0105	0.0021	21	16.6667	0.166667	3.08
1365	1080	13	17	F	A + WF	0.012	0.0099	0.0021	21	17.5	0.175	3.06084
1374	1081	13	17	F	A + WF	0.0137	0.0112	0.0025	25	18.2482	0.182482	3.10496
1284	1085	13	18	F	A + WF	0.0145	0.0119	0.0026	26	17.931	0.17931	3.14908
1311	1138	12	7	F	A + WF	0.0127	0.0101	0.0026	26	20.4724	0.204724	3.01672
1282	1309	10	23	F	A only	0.0137	0.0111	0.0026	26	18.9781	0.189781	3.12
1368	1319	10	25	F	A only	0.0122	0.01	0.0022	22	18.0328	0.180328	3.08
1298	1374	9	9	F	A + WF	0.0117	0.0097	0.002	20	17.094	0.17094	3
1315	1449	9	20	F	A + WF	0.0115	0.0087	0.0028	28	24.3478	0.243478	3
1307	1484	8	2	F	WF only	0.0131	0.0109	0.0022	22	16.7939	0.167939	3.08
1378	1615	7	6	F	A only	0.0132	0.01	0.0032	32	24.2424	0.242424	3.04
1375	1645	7	18	F	A only	0.0101	0.0077	0.0024	24	23.7624	0.237624	2.84
1287	1695	6	10	F	A only	0.0132	0.0103	0.0029	29	21.9697	0.219697	3.06084
1305	1696	6	10	F	A only	0.0122	0.0101	0.0021	21	17.2131	0.172131	3
1303	1697	6	10	F	A only	0.0137	0.0104	0.0033	33	24.0876	0.240876	3.12
1367	1735	6	21	F	A only	0.0126	0.0101	0.0025	25	19.8413	0.198413	3.04
1370	1736	6	21	F	A only	0.014	0.0113	0.0027	27	19.2857	0.192857	3.06084
1292	1772	5	5	F	A + WF	0.0139	0.0116	0.0023	23	16.5468	0.165468	3.08
1280	1778	5	6	F	A + WF	0.0145	0.0115	0.003	30	20.6897	0.206897	3.1932
1300	1786	5	7	F	A + WF	0.0139	0.011	0.0029	29	20.8633	0.208633	3
1304	1787	5	7	F	A + WF	0.0181	0.0144	0.0037	37	20.442	0.20442	3.28
1366	1795	5	8	F	A + WF	0.0118	0.0093	0.0025	25	21.1864	0.211864	2.96
1296	1796	5	8	F	A + WF	0.0114	0.0092	0.0022	22	19.2982	0.192982	2.92
1294	1897	4	3	F	WF only	0.0141	0.0113	0.0028	28	19.8582	0.198582	3.06084
1275	1915	4	6	F	WF only	0.0132	0.0113	0.0019	19	14.3939	0.143939	3.04
1286	1933	4	8	F	WF only	0.0134	0.0116	0.0018	18	13.4328	0.134328	3.14908
1308	1951	4	14	F	WF only	0.0116	0.01	0.0016	16	13.7931	0.137931	2.92
1279	2027	3	10	F	A + WF	0.0125	0.0095	0.003	30	24	0.24	2.9726
1312	2079	3	19	F	A + WF	0.0134	0.0113	0.0021	21	15.6716	0.156716	3.10496
1288	2088	3	20	F	A + WF	0.0122	0.0102	0.002	20	16.3934	0.163934	2.9726
1310	2089	3	20	F	A + WF	0.0111	0.009	0.0021	21	18.9189	0.189189	2.88
1301	2101	3	21	F	A + WF	0.0165	0.0136	0.0029	29	17.5758	0.175758	3.28
1373	2133	2	2	F	A only	0.0126	0.0093	0.0033	33	26.1905	0.261905	3.04
1281	2270	1	11	F	WF only	0.0116	0.0094	0.0022	22	18.9655	0.189655	2.96
1461	91	23	10	F	A only	0.0074	0.0059	0.0015	15	20.2703	0.202703	2.57552
1470	114	23	19	F	A only	0.0107	0.0072	0.0035	35	32.7103	0.327103	2.88
1453	148	22	4	F	A + WF	0.0112	0.0087	0.0025	25	22.3214	0.223214	2.92
1441	194	22	11	F	A + WF	0.0109	0.0084	0.0025	25	22.9358	0.229358	2.92
1448	195	22	11	F	A + WF	0.01	0.0085	0.0015	15	15	0.15	2.84024
1432	224	22	16	F	A + WF	0.011	0.0087	0.0023	23	20.9091	0.209091	3.04
1468	234	22	17	F	A + WF	0.0108	0.009	0.0018	18	16.6667	0.166667	2.92
1466	252	22	20	F	A + WF	0.0092	0.0073	0.0019	19	20.6522	0.206522	2.8
1429	354	21	12	F	A only	0.0142	0.0118	0.0024	24	16.9014	0.169014	3.16
1443	368	21	16	F	A only	0.0128	0.0108	0.002	20	15.625	0.15625	3.04
1436	434	20	11	F	WF only	0.0113	0.0092	0.0021	21	18.5841	0.185841	3.04
1449	470	19	2	F	A + WF	0.0121	0.0102	0.0019	19	15.7025	0.157025	3
1464	546	19	14	F	A + WF	0.0147	0.012	0.0027	27	18.3673	0.183673	3.12
1457	686	17	2	F	A only	0.0141	0.0109	0.0032	32	22.695	0.22695	3.10496
1454	687	17	2	F	A only	0.0143	0.0113	0.003	30	20.979	0.20979	3.2
1437	688	17	2	F	A only	0.0143	0.0116	0.0027	27	18.8811	0.188811	3.2
1452	707	17	4	F	A only	0.0122	0.01	0.0022	22	18.0328	0.180328	3.08
1431	713	17	6	F	A only	0.014	0.0113	0.0027	27	19.2857	0.192857	3.2
1435	714	17	6	F	A only	0.0133	0.0113	0.002	20	15.0376	0.150376	3.2
1459	737	17	12	F	A only	0.0109	0.0095	0.0014	14	12.844	0.12844	2.84024
1451	750	16	5	F	A only	0.0151	0.012	0.0031	31	20.5298	0.205298	3.2
1446	760	16	6	F	A only	0.0153	0.0123	0.003	30	19.6078	0.196078	3.2
1430	791	16	10	F	A only	0.0136	0.0105	0.0031	31	22.7941	0.227941	3.06084
1450	801	16	11	F	A only	0.0136	0.0102	0.0034	34	25	0.25	3.06084
1458	1137	12	7	F	A + WF	0.0129	0.0103	0.0026	26	20.155	0.20155	3.08
1428	1148	12	9	F	A + WF	0.0129	0.0095	0.0034	34	26.3566	0.263566	3.08
1438	1307	10	23	F	A only	0.0152	0.0129	0.0023	23	15.1316	0.151316	3.28
1442	1375	9	9	F	A + WF	0.0122	0.0097	0.0025	25	20.4918	0.204918	3.06084
1474	1420	9	15	F	A + WF	0.0127	0.0103	0.0024	24	18.8976	0.188976	3.04
1434	1450	9	20	F	A + WF	0.0097	0.0085	0.0012	12	12.3711	0.123711	2.92
1467	1583	7	2	F	A only	0.0105	0.0084	0.0021	21	20	0.2	2.92
1473	1584	7	2	F	A only	0.0144	0.0118	0.0026	26	18.0556	0.180556	3.16
1465	1603	7	5	F	A only	0.0162	0.0131	0.0031	31	19.1358	0.191358	3.24
1440	1614	7	6	F	A only	0.0128	0.0106	0.0022	22	17.1875	0.171875	3
1439	1660	6	3	F	A only	0.0122	0.0103	0.0019	19	15.5738	0.155738	3.08
1445	1668	6	4	F	A only	0.0147	0.0119	0.0028	28	19.0476	0.190476	3.24
1471	1711	6	16	F	A only	0.0089	0.0076	0.0013	13	14.6067	0.146067	2.61964
1462	1734	6	21	F	A only	0.0168	0.0133	0.0035	35	20.8333	0.208333	3.28
1472	1737	6	21	F	A only	0.0136	0.0113	0.0023	23	16.9118	0.169118	3.04
1463	1748	5	2	F	A + WF	0.0114	0.0096	0.0018	18	15.7895	0.157895	2.92
1433	1771	5	5	F	A + WF	0.0114	0.0092	0.0022	22	19.2982	0.192982	2.9726
1447	1788	5	7	F	A + WF	0.0145	0.0117	0.0028	28	19.3103	0.193103	3.12
1444	1808	5	10	F	A + WF	0.0132	0.011	0.0022	22	16.6667	0.166667	3.04
1456	1998	3	4	F	A + WF	0.0115	0.009	0.0025	25	21.7391	0.217391	2.88
1455	2141	2	3	F	A only	0.0133	0.0108	0.0025	25	18.797	0.18797	3.12
1469	2158	2	5	F	A only	0.0151	0.0116	0.0035	35	23.1788	0.231788	3.2
1460	2168	2	6	F	A only	0.0137	0.0112	0.0025	25	18.2482	0.182482	3.12
1409	363	21	15	F	A only	0.0154	0.0125	0.0029	29	18.8312	0.188312	3.28
1417	366	21	15	F	A only	0.0133	0.0111	0.0022	22	16.5414	0.165414	3.08
1416	369	21	16	F	A only	0.0133	0.0105	0.0028	28	21.0526	0.210526	3.04
1425	538	19	12	F	A + WF	0.0126	0.0106	0.002	20	15.873	0.15873	3.08
1406	539	19	12	F	A + WF	0.0131	0.0103	0.0028	28	21.374	0.21374	3.04
1413	675	17	1	F	A only	0.0117	0.0102	0.0015	15	12.8205	0.128205	3.06084
1410	689	17	2	F	A only	0.0139	0.0115	0.0024	24	17.2662	0.172662	3.16
1404	723	17	7	F	A only	0.0156	0.0124	0.0032	32	20.5128	0.205128	3.28
1414	788	16	10	F	A only	0.0142	0.0107	0.0035	35	24.6479	0.246479	3.10496
1421	789	16	10	F	A only	0.0139	0.0113	0.0026	26	18.705	0.18705	3.2
1407	790	16	10	F	A only	0.0138	0.0112	0.0026	26	18.8406	0.188406	3.10496
1422	871	15	12	F	WF only	0.0072	0.0066	0.0006	6	8.33333	0.0833333	2.66376
1408	1079	13	17	F	A + WF	0.0147	0.0115	0.0032	32	21.7687	0.217687	3.2
1418	1244	10	4	F	A only	0.0096	0.0077	0.0019	19	19.7917	0.197917	2.88
1415	1419	9	15	F	A + WF	0.012	0.0102	0.0018	18	15	0.15	2.9726
1424	1451	9	20	F	A + WF	0.011	0.0095	0.0015	15	13.6364	0.136364	3
1420	1457	9	22	F	A + WF	0.0116	0.0097	0.0019	19	16.3793	0.163793	3.01672
1423	1458	9	22	F	A + WF	0.0105	0.0095	0.001	10	9.52381	0.0952381	2.92848
1411	1585	7	2	F	A only	0.014	0.0114	0.0026	26	18.5714	0.185714	3.2
1419	1586	7	2	F	A only	0.0139	0.0115	0.0024	24	17.2662	0.172662	3.12
1405	1617	7	6	F	A only	0.0119	0.0097	0.0022	22	18.4874	0.184874	3.04
1412	1682	6	5	F	A only	0.015	0.012	0.003	30	20	0.2	3.24
1427	1690	6	9	F	A only	0.0146	0.012	0.0026	26	17.8082	0.178082	3.1932
1403	1703	6	11	F	A only	0.0116	0.0092	0.0024	24	20.6897	0.206897	2.88
1426	1797	5	8	F	A + WF	0.0103	0.0086	0.0017	17	16.5049	0.165049	2.88
1402	2134	2	2	F	A only	0.0159	0.0121	0.0038	38	23.8994	0.238994	3.24
1382	76	23	8	F	A only	0.0115	0.0094	0.0021	21	18.2609	0.182609	2.96
1385	215	22	14	F	A + WF	0.0137	0.0112	0.0025	25	18.2482	0.182482	3.16
1380	1661	6	3	F	A only	0.0145	0.0119	0.0026	26	17.931	0.17931	3.24
1384	1662	6	3	F	A only	0.0131	0.0105	0.0026	26	19.8473	0.198473	3.12
1381	1680	6	5	F	A only	0.0152	0.0124	0.0028	28	18.4211	0.184211	3.1932
1379	1702	6	11	F	A only	0.0119	0.0094	0.0025	25	21.0084	0.210084	3
1383	2182	2	8	F	A only	0.0129	0.0104	0.0025	25	19.3798	0.193798	3.06084
1401	742	16	3	F	A only	0.0149	0.012	0.0029	29	19.4631	0.194631	3.2
1398	775	16	8	F	A only	0.0142	0.011	0.0032	32	22.5352	0.225352	3.08
1391	1129	12	6	F	A + WF	0.0135	0.0105	0.003	30	22.2222	0.222222	3.04
1400	1263	10	10	F	A only	0.0122	0.0099	0.0023	23	18.8525	0.188525	2.92
1394	1267	10	11	F	A only	0.0049	0.004	0.0009	9	18.3673	0.183673	2.4
1393	1658	6	3	F	A only	0.0144	0.0119	0.0025	25	17.3611	0.173611	3.2
1392	1659	6	3	F	A only	0.0156	0.0125	0.0031	31	19.8718	0.198718	3.28
1386	1679	6	5	F	A only	0.0148	0.0123	0.0025	25	16.8919	0.168919	3.28
1390	1681	6	5	F	A only	0.0146	0.0114	0.0032	32	21.9178	0.219178	3.2
1395	1691	6	9	F	A only	0.0131	0.0106	0.0025	25	19.084	0.19084	3.1932
1389	1743	5	1	F	A + WF	0.0144	0.0116	0.0028	28	19.4444	0.194444	3.1932
1397	1747	5	2	F	A + WF	0.0146	0.0117	0.0029	29	19.863	0.19863	3.12
1387	1805	5	9	F	A + WF	0.0141	0.0114	0.0027	27	19.1489	0.191489	3.08
1399	2068	3	17	F	A + WF	0.0109	0.009	0.0019	19	17.4312	0.174312	2.79612
1388	2135	2	2	F	A only	0.0161	0.0126	0.0035	35	21.7391	0.217391	3.24
1396	2209	2	12	F	A only	0.0142	0.0115	0.0027	27	19.0141	0.190141	3.08
1326	537	19	12	F	A + WF	0.0116	0.0093	0.0023	23	19.8276	0.198276	2.9726
1330	676	17	1	F	A only	0.0118	0.0091	0.0027	27	22.8814	0.228814	3
1322	783	16	9	F	A only	0.0144	0.0105	0.0039	39	27.0833	0.270833	3.16
1320	784	16	9	F	A only	0.0118	0.0089	0.0029	29	24.5763	0.245763	3.04
1319	1130	12	6	F	A + WF	0.0125	0.0096	0.0029	29	23.2	0.232	3
1328	1308	10	23	F	A only	0.0125	0.0106	0.0019	19	15.2	0.152	3.12
1327	1440	9	18	F	A + WF	0.0092	0.0079	0.0013	13	14.1304	0.141304	2.84024
1323	1596	7	4	F	A only	0.0162	0.0124	0.0038	38	23.4568	0.234568	3.23732
1331	1598	7	4	F	A only	0.0148	0.0118	0.003	30	20.2703	0.202703	3.2
1325	1689	6	9	F	A only	0.0148	0.0126	0.0022	22	14.8649	0.148649	3.24
1329	2151	2	4	F	A only	0.0136	0.0103	0.0033	33	24.2647	0.242647	3.12
1318	2177	2	8	F	A only	0.0135	0.0113	0.0022	22	16.2963	0.162963	3.10496
1324	2186	2	9	F	A only	0.009	0.0071	0.0019	19	21.1111	0.211111	2.79612
1321	2203	2	11	F	A only	0.0136	0.0107	0.0029	29	21.3235	0.213235	3.01672
1353	543	19	13	F	A + WF	0.012	0.01	0.002	20	16.6667	0.166667	3.04
1352	544	19	14	F	A + WF	0.0142	0.0108	0.0034	34	23.9437	0.239437	3.12
1359	548	19	14	F	A + WF	0.0108	0.0091	0.0017	17	15.7407	0.157407	2.88436
1354	710	17	4	F	A only	0.0144	0.0112	0.0032	32	22.2222	0.222222	3.12
1356	1286	10	17	F	A only	0.013	0.0105	0.0025	25	19.2308	0.192308	3.08
1351	1429	9	16	F	A + WF	0.0089	0.0075	0.0014	14	15.7303	0.157303	2.68
1350	1548	8	10	F	WF only	0.0077	0.0067	0.001	10	12.987	0.12987	2.68
1355	2178	2	8	F	A only	0.0125	0.0104	0.0021	21	16.8	0.168	3.04
1357	2199	2	11	F	A only	0.0154	0.0116	0.0038	38	24.6753	0.246753	3.16
1358	2202	2	11	F	A only	0.0134	0.0107	0.0027	27	20.1493	0.201493	3.06084
1362	545	19	14	F	A + WF	0.0141	0.0115	0.0026	26	18.4397	0.184397	3.12
1360	976	14	9	F	A + WF	0.0079	0.0075	0.0004	4	5.06329	0.0506329	2.68
1361	2108	3	22	F	A + WF	0.0137	0.0108	0.0029	29	21.1679	0.211679	3.10496
1363	2211	2	12	F	A only	0.0173	0.0135	0.0038	38	21.9653	0.219653	3.28
1364	547	19	14	F	A + WF	0.0139	0.0116	0.0023	23	16.5468	0.165468	3.12
1317	1985	3	2	F	A + WF	0.0125	0.01	0.0025	25	20	0.2	3.04
1349	2208	2	12	F	A only	0.0163	0.0127	0.0036	36	22.0859	0.220859	3.23732
1316	2210	2	12	F	A only	0.0158	0.0128	0.003	30	18.9873	0.189873	3.2

## Sheet: pollen provisions+prov quality
capsule no.	cage no.	nest no.	sex	treatment	phacelia (no. pollen grains)	helmul (no. pollen grains)	helann (no. pollen grains)	total WF (no. pollen grains)	alfalfa (no. pollen grains)	unknown (no. pollen grains)	unidentifiable (no. pollen grains)	total pollen grains counted	total pollen grains with ID	total pollen grains unknown/unidentifiable	alfalfa pollen (%)	WF pollen (%)	phacelia pollen (%)	helmul pollen (%)	helann pollen (%)	phacelia protein content (56.64%)	helmul protein content (24.9%)	alfalfa protein content (19.6%; Stace 1996)	pollen provision protein content (%)
1443	9	19	F	A + WF	6	0	0	6	92	0	2	100	98	2	92	6	6	0	0	339.84	0	1803.2	21.8678
613	18	4	F	WF only	88	11	0	99	0	0	1	100	99	1	0	99	88	11	0	4984.32	273.9	0	53.1133
897	15	18	F	WF only	97	0	0	97	1	0	2	100	98	2	1	97	97	0	0	5494.08	0	19.6	56.262
989	14	11	F	A + WF	35	5	0	40	60	0	0	100	100	0	60	40	35	5	0	1982.4	124.5	1176	32.829
1332	9	3	F	A + WF	41	1	0	42	58	0	0	100	100	0	58	42	41	1	0	2322.24	24.9	1136.8	34.8394
1523	8	7	F	WF only	83	12	0	95	4	0	1	100	99	1	4	95	83	12	0	4701.12	298.8	78.4	51.2962
1556	8	13	F	WF only	99	0	0	99	0	0	1	100	99	1	0	99	99	0	0	5607.36	0	0	56.64
1557	8	13	F	WF only	99	0	0	99	0	0	1	100	99	1	0	99	99	0	0	5607.36	0	0	56.64
1841	5	16	F	A + WF	99	0	0	99	1	0	0	100	100	0	1	99	99	0	0	5607.36	0	19.6	56.2696
1949	4	14	F	WF only	95	4	0	99	0	0	1	100	99	1	0	99	95	4	0	5380.8	99.6	0	55.3576
1966	4	18	F	WF only	99	0	0	99	0	0	1	100	99	1	0	99	99	0	0	5607.36	0	0	56.64
2078	3	19	F	A + WF	47	0	0	47	53	0	0	100	100	0	53	47	47	0	0	2662.08	0	1038.8	37.0088
2220	1	1	F	WF only	96	0	0	96	3	0	1	100	99	1	3	96	96	0	0	5437.44	0	58.8	55.5176
2226	1	2	F	WF only	99	0	0	99	1	0	0	100	100	0	1	99	99	0	0	5607.36	0	19.6	56.2696
2276	1	16	F	WF only	100	0	0	100	0	0	0	100	100	0	0	100	100	0	0	5664	0	0	56.64
167	22	7	F	A + WF	37	0	0	37	58	0	5	100	95	5	58	37	37	0	0	2095.68	0	1136.8	34.0261
177	22	8	F	A + WF	62	0	0	62	38	0	0	100	100	0	38	62	62	0	0	3511.68	0	744.8	42.5648
262	22	23	F	A + WF	8	6	0	14	85	0	1	100	99	1	85	14	8	6	0	453.12	149.4	1666	22.9143
469	19	2	F	A + WF	34	0	0	34	64	0	2	100	98	2	64	34	34	0	0	1925.76	0	1254.4	32.4506
573	19	18	F	A + WF	1	0	0	1	99	0	0	100	100	0	99	1	1	0	0	56.64	0	1940.4	19.9704
612	18	4	F	WF only	92	5	0	97	2	0	1	100	99	1	2	97	92	5	0	5210.88	124.5	39.2	54.2887
639	18	10	F	WF only	85	15	0	100	0	0	0	100	100	0	0	100	85	15	0	4814.4	373.5	0	51.879
658	18	14	F	WF only	100	0	0	100	0	0	0	100	100	0	0	100	100	0	0	5664	0	0	56.64
834	15	4	F	WF only	99	0	0	99	1	0	0	100	100	0	1	99	99	0	0	5607.36	0	19.6	56.2696
899	15	19	F	WF only	98	0	0	98	2	0	0	100	100	0	2	98	98	0	0	5550.72	0	39.2	55.8992
955	14	7	F	A + WF	20	0	0	20	79	0	1	100	99	1	79	20	20	0	0	1132.8	0	1548.4	27.0828
983	14	10	F	A + WF	35	2	0	37	63	0	0	100	100	0	63	37	35	2	0	1982.4	49.8	1234.8	32.67
1000	14	14	F	A + WF	28	0	0	28	72	0	0	100	100	0	72	28	28	0	0	1585.92	0	1411.2	29.9712
1008	14	15	F	A + WF	17	0	0	17	81	0	2	100	98	2	81	17	17	0	0	962.88	0	1587.6	26.0253
1010	14	15	F	A + WF	28	1	0	29	71	0	0	100	100	0	71	29	28	1	0	1585.92	24.9	1391.6	30.0242
1019	14	16	F	A + WF	13	0	0	13	87	0	0	100	100	0	87	13	13	0	0	736.32	0	1705.2	24.4152
1021	14	16	F	A + WF	3	1	0	4	95	0	1	100	99	1	95	4	3	1	0	169.92	24.9	1862	20.776
1022	14	16	F	A + WF	6	0	0	6	94	0	0	100	100	0	94	6	6	0	0	339.84	0	1842.4	21.8224
1072	13	13	F	A + WF	26	0	0	26	73	0	1	100	99	1	73	26	26	0	0	1472.64	0	1430.8	29.3277
1073	13	13	F	A + WF	13	0	0	13	86	0	1	100	99	1	86	13	13	0	0	736.32	0	1685.6	24.4638
1083	13	18	F	A + WF	25	0	0	25	73	0	2	100	98	2	73	25	25	0	0	1416	0	1430.8	29.049
1086	13	18	F	A + WF	10	0	0	10	88	0	2	100	98	2	88	10	10	0	0	566.4	0	1724.8	23.3796
1087	13	18	F	A + WF	4	1	0	5	93	0	2	100	98	2	93	5	4	1	0	226.56	24.9	1822.8	21.1659
1117	12	4	F	A + WF	55	0	0	55	42	0	3	100	97	3	42	55	55	0	0	3115.2	0	823.2	40.6021
1153	12	12	F	A + WF	29	0	0	29	69	0	2	100	98	2	69	29	29	0	0	1642.56	0	1352.4	30.5608
1222	11	20	F	WF only	100	0	0	100	0	0	0	100	100	0	0	100	100	0	0	5664	0	0	56.64
1223	11	20	F	WF only	99	0	0	99	0	0	1	100	99	1	0	99	99	0	0	5607.36	0	0	56.64
1230	11	21	F	WF only	100	0	0	100	0	0	0	100	100	0	0	100	100	0	0	5664	0	0	56.64
1391	9	11	F	A + WF	47	0	0	47	52	0	1	100	99	1	52	47	47	0	0	2662.08	0	1019.2	37.1846
1405	9	12	F	A + WF	70	0	0	70	28	0	2	100	98	2	28	70	70	0	0	3964.8	0	548.8	46.0571
1418	9	15	F	A + WF	26	0	0	26	72	0	2	100	98	2	72	26	26	0	0	1472.64	0	1411.2	29.4269
1432	9	17	F	A + WF	29	0	0	29	70	0	1	100	99	1	70	29	29	0	0	1642.56	0	1372	30.4501
1502	8	4	F	WF only	89	9	0	98	0	0	2	100	98	2	0	98	89	9	0	5040.96	224.1	0	53.7251
1513	8	6	F	WF only	80	18	0	98	0	0	2	100	98	2	0	98	80	18	0	4531.2	448.2	0	50.8102
1521	8	7	F	WF only	94	3	0	97	2	0	1	100	99	1	2	97	94	3	0	5324.16	74.7	39.2	54.9299
1522	8	7	F	WF only	87	12	0	99	1	0	0	100	100	0	1	99	87	12	0	4927.68	298.8	19.6	52.4608
1616	7	6	F	A only	0	0	0	0	99	0	1	100	99	1	99	0	0	0	0	0	0	1940.4	19.6
1624	7	9	F	A only	0	0	0	0	98	0	2	100	98	2	98	0	0	0	0	0	0	1920.8	19.6
1637	7	14	F	A only	0	0	0	0	98	0	2	100	98	2	98	0	0	0	0	0	0	1920.8	19.6
1644	7	18	F	A only	0	0	0	0	100	0	0	100	100	0	100	0	0	0	0	0	0	1960	19.6
1753	5	3	F	A + WF	49	0	0	49	51	0	0	100	100	0	51	49	49	0	0	2775.36	0	999.6	37.7496
1776	5	6	F	A + WF	69	0	0	69	30	0	1	100	99	1	30	69	69	0	0	3908.16	0	588	45.4158
1833	5	15	F	A + WF	34	0	0	34	66	0	0	100	100	0	66	34	34	0	0	1925.76	0	1293.6	32.1936
1844	5	16	F	A + WF	71	0	0	71	28	0	1	100	99	1	28	71	71	0	0	4021.44	0	548.8	46.164
1923	4	7	F	WF only	88	11	0	99	0	0	1	100	99	1	0	99	88	11	0	4984.32	273.9	0	53.1133
1935	4	8	F	WF only	94	6	0	100	0	0	0	100	100	0	0	100	94	6	0	5324.16	149.4	0	54.7356
1956	4	15	F	WF only	96	3	0	99	1	0	0	100	100	0	1	99	96	3	0	5437.44	74.7	19.6	55.3174
1988	3	3	F	A + WF	51	0	0	51	48	0	1	100	99	1	48	51	51	0	0	2888.64	0	940.8	38.6812
12	24	4	F	WF only	96	0	0	96	1	0	3	100	97	3	1	96	96	0	0	5437.44	0	19.6	56.2581
89	23	10	F	A only	0	0	0	0	98	0	2	100	98	2	98	0	0	0	0	0	0	1920.8	19.6
133	22	1	F	A + WF	52	0	0	52	47	0	1	100	99	1	47	52	52	0	0	2945.28	0	921.2	39.0554
149	22	4	F	A + WF	0	0	0	0	100	0	0	100	100	0	100	0	0	0	0	0	0	1960	19.6
158	22	5	F	A + WF	0	0	0	0	100	0	0	100	100	0	100	0	0	0	0	0	0	1960	19.6
168	22	7	F	A + WF	13	0	0	13	85	0	2	100	98	2	85	13	13	0	0	736.32	0	1666	24.5135
170	22	7	F	A + WF	14	0	0	14	85	0	1	100	99	1	85	14	14	0	0	792.96	0	1666	24.838
176	22	8	F	A + WF	25	0	0	25	75	0	0	100	100	0	75	25	25	0	0	1416	0	1470	28.86
178	22	8	F	A + WF	20	0	0	20	76	0	4	100	96	4	76	20	20	0	0	1132.8	0	1489.6	27.3167
219	22	15	F	A + WF	5	0	0	5	94	0	1	100	99	1	94	5	5	0	0	283.2	0	1842.4	21.4707
220	22	15	F	A + WF	34	0	0	34	66	0	0	100	100	0	66	34	34	0	0	1925.76	0	1293.6	32.1936
353	21	12	F	A only	0	0	0	0	100	0	0	100	100	0	100	0	0	0	0	0	0	1960	19.6
377	21	22	F	A only	0	0	0	0	98	0	2	100	98	2	98	0	0	0	0	0	0	1920.8	19.6
421	20	6	F	WF only	100	0	0	100	0	0	0	100	100	0	0	100	100	0	0	5664	0	0	56.64
430	20	9	F	WF only	98	0	0	98	1	0	1	100	99	1	1	98	98	0	0	5550.72	0	19.6	56.2659
441	20	13	F	WF only	100	0	0	100	0	0	0	100	100	0	0	100	100	0	0	5664	0	0	56.64
442	20	13	F	WF only	100	0	0	100	0	0	0	100	100	0	0	100	100	0	0	5664	0	0	56.64
443	20	13	F	WF only	96	0	0	96	1	0	3	100	97	3	1	96	96	0	0	5437.44	0	19.6	56.2581
574	19	18	F	A + WF	5	0	0	5	94	0	1	100	99	1	94	5	5	0	0	283.2	0	1842.4	21.4707
583	19	19	F	A + WF	20	0	0	20	79	0	1	100	99	1	79	20	20	0	0	1132.8	0	1548.4	27.0828
585	19	19	F	A + WF	55	0	0	55	44	0	1	100	99	1	44	55	55	0	0	3115.2	0	862.4	40.1778
659	18	14	F	WF only	94	2	0	96	2	0	2	100	98	2	2	96	94	2	0	5324.16	49.8	39.2	55.2363
734	17	11	F	A only	0	0	0	0	100	0	0	100	100	0	100	0	0	0	0	0	0	1960	19.6
761	16	6	F	A only	0	0	0	0	99	0	1	100	99	1	99	0	0	0	0	0	0	1940.4	19.6
792	16	10	F	A only	0	0	0	0	100	0	0	100	100	0	100	0	0	0	0	0	0	1960	19.6
799	16	11	F	A only	0	0	0	0	100	0	0	100	100	0	100	0	0	0	0	0	0	1960	19.6
835	15	4	F	WF only	100	0	0	100	0	0	0	100	100	0	0	100	100	0	0	5664	0	0	56.64
876	15	13	F	WF only	100	0	0	100	0	0	0	100	100	0	0	100	100	0	0	5664	0	0	56.64
877	15	13	F	WF only	99	0	0	99	0	0	1	100	99	1	0	99	99	0	0	5607.36	0	0	56.64
882	15	14	F	WF only	98	0	0	98	0	0	2	100	98	2	0	98	98	0	0	5550.72	0	0	56.64
883	15	14	F	WF only	98	0	0	98	0	0	2	100	98	2	0	98	98	0	0	5550.72	0	0	56.64
884	15	14	F	WF only	97	0	0	97	1	0	2	100	98	2	1	97	97	0	0	5494.08	0	19.6	56.262
913	15	27	F	WF only	100	0	0	100	0	0	0	100	100	0	0	100	100	0	0	5664	0	0	56.64
965	14	8	F	A + WF	19	1	0	20	80	0	0	100	100	0	80	20	19	1	0	1076.16	24.9	1568	26.6906
998	14	14	F	A + WF	68	4	0	72	27	0	1	100	99	1	27	72	68	4	0	3851.52	99.6	529.2	45.2558
999	14	14	F	A + WF	35	2	0	37	63	0	0	100	100	0	63	37	35	2	0	1982.4	49.8	1234.8	32.67
1020	14	16	F	A + WF	9	0	0	9	90	0	1	100	99	1	90	9	9	0	0	509.76	0	1764	22.9673
1071	13	13	F	A + WF	24	0	0	24	73	0	3	100	97	3	73	24	24	0	0	1359.36	0	1430.8	28.7645
1084	13	18	F	A + WF	9	0	0	9	91	0	0	100	100	0	91	9	9	0	0	509.76	0	1783.6	22.9336
1088	13	18	F	A + WF	0	0	0	0	100	0	0	100	100	0	100	0	0	0	0	0	0	1960	19.6
1107	12	3	F	A + WF	40	0	0	40	60	0	0	100	100	0	60	40	40	0	0	2265.6	0	1176	34.416
1118	12	4	F	A + WF	10	0	0	10	90	0	0	100	100	0	90	10	10	0	0	566.4	0	1764	23.304
1299	10	21	F	A only	0	0	0	0	100	0	0	100	100	0	100	0	0	0	0	0	0	1960	19.6
1315	10	24	F	A only	0	0	0	0	100	0	0	100	100	0	100	0	0	0	0	0	0	1960	19.6
1331	9	3	F	A + WF	56	2	0	58	41	0	1	100	99	1	41	58	56	2	0	3171.84	49.8	803.6	40.659
1373	9	9	F	A + WF	56	0	0	56	42	0	2	100	98	2	42	56	56	0	0	3171.84	0	823.2	40.7657
1393	9	11	F	A + WF	62	0	0	62	36	0	2	100	98	2	36	62	62	0	0	3511.68	0	705.6	43.0335
1714	6	17	F	A only	0	0	0	0	96	0	4	100	96	4	96	0	0	0	0	0	0	1881.6	19.6
1715	6	17	F	A only	0	0	0	0	99	0	1	100	99	1	99	0	0	0	0	0	0	1940.4	19.6
1752	5	3	F	A + WF	48	0	0	48	50	0	2	100	98	2	50	48	48	0	0	2718.72	0	980	37.742
1760	5	4	F	A + WF	23	2	0	25	74	0	1	100	99	1	74	25	23	2	0	1302.72	49.8	1450.4	28.3123
1761	5	4	F	A + WF	35	0	0	35	64	0	1	100	99	1	64	35	35	0	0	1982.4	0	1254.4	32.6949
1762	5	4	F	A + WF	15	0	0	15	84	0	1	100	99	1	84	15	15	0	0	849.6	0	1646.4	25.2121
1775	5	6	F	A + WF	60	0	0	60	39	0	1	100	99	1	39	60	60	0	0	3398.4	0	764.4	42.0485
1831	5	15	F	A + WF	33	0	0	33	65	0	2	100	98	2	65	33	33	0	0	1869.12	0	1274	32.0727
1832	5	15	F	A + WF	16	0	0	16	82	0	2	100	98	2	82	16	16	0	0	906.24	0	1607.2	25.6473
1834	5	15	F	A + WF	21	0	0	21	79	0	0	100	100	0	79	21	21	0	0	1189.44	0	1548.4	27.3784
1843	5	16	F	A + WF	35	0	0	35	65	0	0	100	100	0	65	35	35	0	0	1982.4	0	1274	32.564
1901	4	4	F	WF only	96	0	0	96	3	0	1	100	99	1	3	96	96	0	0	5437.44	0	58.8	55.5176
1902	4	4	F	WF only	100	0	0	100	0	0	0	100	100	0	0	100	100	0	0	5664	0	0	56.64
1924	4	7	F	WF only	94	4	0	98	0	0	2	100	98	2	0	98	94	4	0	5324.16	99.6	0	55.3445
1925	4	7	F	WF only	94	5	0	99	0	0	1	100	99	1	0	99	94	5	0	5324.16	124.5	0	55.037
2026	3	10	F	A + WF	32	3	0	35	62	0	3	100	97	3	62	35	32	3	0	1812.48	74.7	1215.2	31.9833
2067	3	17	F	A + WF	75	0	0	75	25	0	0	100	100	0	25	75	75	0	0	4248	0	490	47.38
2098	3	21	F	A + WF	41	2	0	43	55	0	2	100	98	2	55	43	41	2	0	2322.24	49.8	1078	35.2045
2100	3	21	F	A + WF	47	4	0	51	49	0	0	100	100	0	49	51	47	4	0	2662.08	99.6	960.4	37.2208
2122	3	24	F	A + WF	85	1	0	86	11	0	3	100	97	3	11	86	85	1	0	4814.4	24.9	215.6	52.1124
2123	3	24	F	A + WF	86	0	0	86	14	0	0	100	100	0	14	86	86	0	0	4871.04	0	274.4	51.4544
2219	1	1	F	WF only	98	0	0	98	2	0	0	100	100	0	2	98	98	0	0	5550.72	0	39.2	55.8992
2279	1	18	F	WF only	100	0	0	100	0	0	0	100	100	0	0	100	100	0	0	5664	0	0	56.64
2280	1	18	F	WF only	100	0	0	100	0	0	0	100	100	0	0	100	100	0	0	5664	0	0	56.64
2281	1	18	F	WF only	98	0	0	98	0	0	2	100	98	2	0	98	98	0	0	5550.72	0	0	56.64
94	23	10	F	A only	0	0	0	0	100	0	0	100	100	0	100	0	0	0	0	0	0	1960	19.6
150	22	4	F	A + WF	0	0	0	0	100	0	0	100	100	0	100	0	0	0	0	0	0	1960	19.6
159	22	5	F	A + WF	0	0	0	0	99	0	1	100	99	1	99	0	0	0	0	0	0	1940.4	19.6
169	22	7	F	A + WF	15	0	0	15	83	0	2	100	98	2	83	15	15	0	0	849.6	0	1626.8	25.2694
212	22	12	F	A + WF	18	0	0	18	82	0	0	100	100	0	82	18	18	0	0	1019.52	0	1607.2	26.2672
235	22	17	F	A + WF	0	0	0	0	98	0	2	100	98	2	98	0	0	0	0	0	0	1920.8	19.6
314	21	2	F	A only	0	0	0	0	98	0	2	100	98	2	98	0	0	0	0	0	0	1920.8	19.6
364	21	15	F	A only	0	0	0	0	99	0	1	100	99	1	99	0	0	0	0	0	0	1940.4	19.6
433	20	11	F	WF only	99	0	0	99	0	0	1	100	99	1	0	99	99	0	0	5607.36	0	0	56.64
462	20	19	F	WF only	98	0	0	98	0	0	2	100	98	2	0	98	98	0	0	5550.72	0	0	56.64
463	20	19	F	WF only	100	0	0	100	0	0	0	100	100	0	0	100	100	0	0	5664	0	0	56.64
572	19	18	F	A + WF	14	1	0	15	84	0	1	100	99	1	84	15	14	1	0	792.96	24.9	1646.4	24.8915
660	18	14	F	WF only	93	5	0	98	2	0	0	100	100	0	2	98	93	5	0	5267.52	124.5	39.2	54.3122
661	18	14	F	WF only	99	1	0	100	0	0	0	100	100	0	0	100	99	1	0	5607.36	24.9	0	56.3226
741	16	3	F	A only	0	0	0	0	97	0	3	100	97	3	97	0	0	0	0	0	0	1901.2	19.6
763	16	6	F	A only	0	0	0	0	100	0	0	100	100	0	100	0	0	0	0	0	0	1960	19.6
766	16	7	F	A only	0	0	0	0	98	0	2	100	98	2	98	0	0	0	0	0	0	1920.8	19.6
767	16	7	F	A only	0	0	0	0	100	0	0	100	100	0	100	0	0	0	0	0	0	1960	19.6
800	16	11	F	A only	0	0	0	0	100	0	0	100	100	0	100	0	0	0	0	0	0	1960	19.6
829	15	2	F	WF only	97	3	0	100	0	0	0	100	100	0	0	100	97	3	0	5494.08	74.7	0	55.6878
982	14	10	F	A + WF	27	0	0	27	72	0	1	100	99	1	72	27	27	0	0	1529.28	0	1411.2	29.7018
1018	14	16	F	A + WF	13	0	0	13	87	0	0	100	100	0	87	13	13	0	0	736.32	0	1705.2	24.4152
1029	14	17	F	A + WF	12	0	0	12	88	0	0	100	100	0	88	12	12	0	0	679.68	0	1724.8	24.0448
1080	13	17	F	A + WF	0	0	0	0	99	0	1	100	99	1	99	0	0	0	0	0	0	1940.4	19.6
1081	13	17	F	A + WF	5	0	0	5	94	0	1	100	99	1	94	5	5	0	0	283.2	0	1842.4	21.4707
1085	13	18	F	A + WF	32	0	0	32	68	0	0	100	100	0	68	32	32	0	0	1812.48	0	1332.8	31.4528
1138	12	7	F	A + WF	17	0	0	17	82	0	1	100	99	1	82	17	17	0	0	962.88	0	1607.2	25.9604
1309	10	23	F	A only	0	0	0	0	99	0	1	100	99	1	99	0	0	0	0	0	0	1940.4	19.6
1319	10	25	F	A only	0	0	0	0	99	0	1	100	99	1	99	0	0	0	0	0	0	1940.4	19.6
1374	9	9	F	A + WF	46	0	0	46	54	0	0	100	100	0	54	46	46	0	0	2605.44	0	1058.4	36.6384
1449	9	20	F	A + WF	55	0	0	55	44	0	1	100	99	1	44	55	55	0	0	3115.2	0	862.4	40.1778
1484	8	2	F	WF only	94	2	0	96	1	0	3	100	97	3	1	96	94	2	0	5324.16	49.8	19.6	55.6037
1615	7	6	F	A only	0	0	0	0	100	0	0	100	100	0	100	0	0	0	0	0	0	1960	19.6
1645	7	18	F	A only	0	0	0	0	99	0	1	100	99	1	99	0	0	0	0	0	0	1940.4	19.6
1695	6	10	F	A only	0	0	0	0	99	0	1	100	99	1	99	0	0	0	0	0	0	1940.4	19.6
1696	6	10	F	A only	0	0	0	0	98	0	2	100	98	2	98	0	0	0	0	0	0	1920.8	19.6
1697	6	10	F	A only	0	0	0	0	97	0	3	100	97	3	97	0	0	0	0	0	0	1901.2	19.6
1735	6	21	F	A only	0	0	0	0	100	0	0	100	100	0	100	0	0	0	0	0	0	1960	19.6
1736	6	21	F	A only	0	0	0	0	99	0	1	100	99	1	99	0	0	0	0	0	0	1940.4	19.6
1772	5	5	F	A + WF	11	3	0	14	85	0	1	100	99	1	85	14	11	3	0	623.04	74.7	1666	23.8762
1778	5	6	F	A + WF	65	0	0	65	35	0	0	100	100	0	35	65	65	0	0	3681.6	0	686	43.676
1786	5	7	F	A + WF	41	0	0	41	57	0	2	100	98	2	57	41	41	0	0	2322.24	0	1117.2	35.0963
1787	5	7	F	A + WF	35	0	0	35	63	0	2	100	98	2	63	35	35	0	0	1982.4	0	1234.8	32.8286
1795	5	8	F	A + WF	31	0	0	31	67	0	2	100	98	2	67	31	31	0	0	1755.84	0	1313.2	31.3167
1796	5	8	F	A + WF	36	0	0	36	62	0	2	100	98	2	62	36	36	0	0	2039.04	0	1215.2	33.2065
1897	4	3	F	WF only	95	4	0	99	0	0	1	100	99	1	0	99	95	4	0	5380.8	99.6	0	55.3576
1915	4	6	F	WF only	98	2	0	100	0	0	0	100	100	0	0	100	98	2	0	5550.72	49.8	0	56.0052
1933	4	8	F	WF only	97	3	0	100	0	0	0	100	100	0	0	100	97	3	0	5494.08	74.7	0	55.6878
1951	4	14	F	WF only	94	6	0	100	0	0	0	100	100	0	0	100	94	6	0	5324.16	149.4	0	54.7356
2027	3	10	F	A + WF	12	4	0	16	82	0	2	100	98	2	82	16	12	4	0	679.68	99.6	1607.2	24.3518
2079	3	19	F	A + WF	79	0	0	79	21	0	0	100	100	0	21	79	79	0	0	4474.56	0	411.6	48.8616
2088	3	20	F	A + WF	21	2	0	23	76	0	1	100	99	1	76	23	21	2	0	1189.44	49.8	1489.6	27.564
2089	3	20	F	A + WF	0	2	0	2	96	0	2	100	98	2	96	2	0	2	0	0	49.8	1881.6	19.7082
2101	3	21	F	A + WF	35	0	0	35	65	0	0	100	100	0	65	35	35	0	0	1982.4	0	1274	32.564
2133	2	2	F	A only	0	0	0	0	100	0	0	100	100	0	100	0	0	0	0	0	0	1960	19.6
2270	1	11	F	WF only	100	0	0	100	0	0	0	100	100	0	0	100	100	0	0	5664	0	0	56.64
91	23	10	F	A only	0	0	0	0	97	0	3	100	97	3	97	0	0	0	0	0	0	1901.2	19.6
148	22	4	F	A + WF	0	0	0	0	100	0	0	100	100	0	100	0	0	0	0	0	0	1960	19.6
194	22	11	F	A + WF	2	0	0	2	98	0	0	100	100	0	98	2	2	0	0	113.28	0	1920.8	20.3408
195	22	11	F	A + WF	1	0	0	1	97	0	2	100	98	2	97	1	1	0	0	56.64	0	1901.2	19.978
224	22	16	F	A + WF	0	0	0	0	97	0	3	100	97	3	97	0	0	0	0	0	0	1901.2	19.6
234	22	17	F	A + WF	3	0	0	3	97	0	0	100	100	0	97	3	3	0	0	169.92	0	1901.2	20.7112
252	22	20	F	A + WF	5	0	0	5	94	0	1	100	99	1	94	5	5	0	0	283.2	0	1842.4	21.4707
354	21	12	F	A only	0	0	0	0	96	1	3	100	96	4	96	0	0	0	0	0	0	1881.6	19.6
368	21	16	F	A only	0	0	0	0	99	0	1	100	99	1	99	0	0	0	0	0	0	1940.4	19.6
434	20	11	F	WF only	97	1	0	98	0	0	2	100	98	2	0	98	97	1	0	5494.08	24.9	0	56.3161
470	19	2	F	A + WF	12	0	0	12	81	0	7	100	93	7	81	12	12	0	0	679.68	0	1587.6	24.3794
546	19	14	F	A + WF	2	0	0	2	97	0	1	100	99	1	97	2	2	0	0	113.28	0	1901.2	20.3483
686	17	2	F	A only	0	0	0	0	99	0	1	100	99	1	99	0	0	0	0	0	0	1940.4	19.6
687	17	2	F	A only	0	0	0	0	100	0	0	100	100	0	100	0	0	0	0	0	0	1960	19.6
688	17	2	F	A only	0	0	0	0	98	0	2	100	98	2	98	0	0	0	0	0	0	1920.8	19.6
707	17	4	F	A only	0	0	0	0	100	0	0	100	100	0	100	0	0	0	0	0	0	1960	19.6
713	17	6	F	A only	0	0	0	0	100	0	0	100	100	0	100	0	0	0	0	0	0	1960	19.6
714	17	6	F	A only	0	0	0	0	98	0	2	100	98	2	98	0	0	0	0	0	0	1920.8	19.6
737	17	12	F	A only	0	0	0	0	100	0	0	100	100	0	100	0	0	0	0	0	0	1960	19.6
750	16	5	F	A only	0	0	0	0	100	0	0	100	100	0	100	0	0	0	0	0	0	1960	19.6
760	16	6	F	A only	0	0	0	0	98	0	2	100	98	2	98	0	0	0	0	0	0	1920.8	19.6
791	16	10	F	A only	0	0	0	0	98	0	2	100	98	2	98	0	0	0	0	0	0	1920.8	19.6
801	16	11	F	A only	0	0	0	0	99	0	1	100	99	1	99	0	0	0	0	0	0	1940.4	19.6
1137	12	7	F	A + WF	12	0	0	12	86	0	2	100	98	2	86	12	12	0	0	679.68	0	1685.6	24.1355
1148	12	9	F	A + WF	89	0	0	89	10	0	1	100	99	1	10	89	89	0	0	5040.96	0	196	52.8986
1307	10	23	F	A only	0	0	0	0	97	0	3	100	97	3	97	0	0	0	0	0	0	1901.2	19.6
1375	9	9	F	A + WF	35	0	0	35	64	0	1	100	99	1	64	35	35	0	0	1982.4	0	1254.4	32.6949
1420	9	15	F	A + WF	15	0	0	15	83	0	2	100	98	2	83	15	15	0	0	849.6	0	1626.8	25.2694
1450	9	20	F	A + WF	14	0	0	14	83	0	3	100	97	3	83	14	14	0	0	792.96	0	1626.8	24.946
1583	7	2	F	A only	0	0	0	0	98	0	2	100	98	2	98	0	0	0	0	0	0	1920.8	19.6
1584	7	2	F	A only	0	0	0	0	98	0	2	100	98	2	98	0	0	0	0	0	0	1920.8	19.6
1603	7	5	F	A only	0	0	0	0	95	0	5	100	95	5	95	0	0	0	0	0	0	1862	19.6
1614	7	6	F	A only	0	0	0	0	98	0	2	100	98	2	98	0	0	0	0	0	0	1920.8	19.6
1660	6	3	F	A only	0	0	0	0	100	0	0	100	100	0	100	0	0	0	0	0	0	1960	19.6
1668	6	4	F	A only	0	0	0	0	95	0	5	100	95	5	95	0	0	0	0	0	0	1862	19.6
1711	6	16	F	A only	0	0	0	0	99	0	1	100	99	1	99	0	0	0	0	0	0	1940.4	19.6
1734	6	21	F	A only	0	0	0	0	98	0	2	100	98	2	98	0	0	0	0	0	0	1920.8	19.6
1737	6	21	F	A only	0	0	0	0	99	0	1	100	99	1	99	0	0	0	0	0	0	1940.4	19.6
1748	5	2	F	A + WF	5	0	0	5	95	0	0	100	100	0	95	5	5	0	0	283.2	0	1862	21.452
1771	5	5	F	A + WF	6	0	0	6	94	0	0	100	100	0	94	6	6	0	0	339.84	0	1842.4	21.8224
1788	5	7	F	A + WF	14	0	0	14	83	0	3	100	97	3	83	14	14	0	0	792.96	0	1626.8	24.946
1808	5	10	F	A + WF	43	0	0	43	54	0	3	100	97	3	54	43	43	0	0	2435.52	0	1058.4	36.0198
1998	3	4	F	A + WF	27	0	0	27	69	0	4	100	96	4	69	27	27	0	0	1529.28	0	1352.4	30.0175
2141	2	3	F	A only	0	0	0	0	100	0	0	100	100	0	100	0	0	0	0	0	0	1960	19.6
2158	2	5	F	A only	0	0	0	0	96	0	4	100	96	4	96	0	0	0	0	0	0	1881.6	19.6
2168	2	6	F	A only	0	0	0	0	99	0	1	100	99	1	99	0	0	0	0	0	0	1940.4	19.6
363	21	15	F	A only	0	0	0	0	99	0	1	100	99	1	99	0	0	0	0	0	0	1940.4	19.6
366	21	15	F	A only	0	0	0	0	99	0	1	100	99	1	99	0	0	0	0	0	0	1940.4	19.6
369	21	16	F	A only	0	0	0	0	100	0	0	100	100	0	100	0	0	0	0	0	0	1960	19.6
538	19	12	F	A + WF	1	0	0	1	98	0	1	100	99	1	98	1	1	0	0	56.64	0	1920.8	19.9741
539	19	12	F	A + WF	2	1	0	3	95	0	2	100	98	2	95	3	2	1	0	113.28	24.9	1862	20.41
675	17	1	F	A only	0	0	0	0	99	0	1	100	99	1	99	0	0	0	0	0	0	1940.4	19.6
689	17	2	F	A only	0	0	0	0	100	0	0	100	100	0	100	0	0	0	0	0	0	1960	19.6
723	17	7	F	A only	0	0	0	0	99	0	1	100	99	1	99	0	0	0	0	0	0	1940.4	19.6
788	16	10	F	A only	0	0	0	0	99	0	1	100	99	1	99	0	0	0	0	0	0	1940.4	19.6
789	16	10	F	A only	0	0	0	0	100	0	0	100	100	0	100	0	0	0	0	0	0	1960	19.6
790	16	10	F	A only	0	0	0	0	100	0	0	100	100	0	100	0	0	0	0	0	0	1960	19.6
871	15	12	F	WF only	94	5	0	99	0	0	1	100	99	1	0	99	94	5	0	5324.16	124.5	0	55.037
1079	13	17	F	A + WF	4	6	0	10	89	0	1	100	99	1	89	10	4	6	0	226.56	149.4	1744.4	21.4178
1244	10	4	F	A only	0	0	0	0	100	0	0	100	100	0	100	0	0	0	0	0	0	1960	19.6
1419	9	15	F	A + WF	5	0	0	5	93	0	2	100	98	2	93	5	5	0	0	283.2	0	1822.8	21.4898
1451	9	20	F	A + WF	6	0	0	6	90	0	4	100	96	4	90	6	6	0	0	339.84	0	1764	21.915
1457	9	22	F	A + WF	45	2	0	47	51	0	2	100	98	2	51	47	45	2	0	2548.8	49.8	999.6	36.7163
1458	9	22	F	A + WF	37	0	0	37	57	0	6	100	94	6	57	37	37	0	0	2095.68	0	1117.2	34.1796
1585	7	2	F	A only	0	0	0	0	98	0	2	100	98	2	98	0	0	0	0	0	0	1920.8	19.6
1586	7	2	F	A only	0	0	0	0	95	0	5	100	95	5	95	0	0	0	0	0	0	1862	19.6
1617	7	6	F	A only	0	0	0	0	100	0	0	100	100	0	100	0	0	0	0	0	0	1960	19.6
1682	6	5	F	A only	0	0	0	0	97	0	3	100	97	3	97	0	0	0	0	0	0	1901.2	19.6
1690	6	9	F	A only	0	0	0	0	99	0	1	100	99	1	99	0	0	0	0	0	0	1940.4	19.6
1703	6	11	F	A only	0	0	0	0	96	0	4	100	96	4	96	0	0	0	0	0	0	1881.6	19.6
1797	5	8	F	A + WF	17	0	0	17	82	0	1	100	99	1	82	17	17	0	0	962.88	0	1607.2	25.9604
2134	2	2	F	A only	0	0	0	0	100	0	0	100	100	0	100	0	0	0	0	0	0	1960	19.6
76	23	8	F	A only	0	0	0	0	99	0	1	100	99	1	99	0	0	0	0	0	0	1940.4	19.6
215	22	14	F	A + WF	19	2	0	21	78	0	1	100	99	1	78	21	19	2	0	1076.16	49.8	1528.8	26.8158
1661	6	3	F	A only	0	0	0	0	97	0	3	100	97	3	97	0	0	0	0	0	0	1901.2	19.6
1662	6	3	F	A only	0	0	0	0	98	0	2	100	98	2	98	0	0	0	0	0	0	1920.8	19.6
1680	6	5	F	A only	0	0	0	0	97	0	3	100	97	3	97	0	0	0	0	0	0	1901.2	19.6
1702	6	11	F	A only	0	0	0	0	98	0	2	100	98	2	98	0	0	0	0	0	0	1920.8	19.6
2182	2	8	F	A only	0	0	0	0	99	0	1	100	99	1	99	0	0	0	0	0	0	1940.4	19.6
742	16	3	F	A only	0	0	0	0	99	0	1	100	99	1	99	0	0	0	0	0	0	1940.4	19.6
775	16	8	F	A only	0	0	0	0	100	0	0	100	100	0	100	0	0	0	0	0	0	1960	19.6
1129	12	6	F	A + WF	0	0	0	0	97	0	3	100	97	3	97	0	0	0	0	0	0	1901.2	19.6
1263	10	10	F	A only	0	0	0	0	100	0	0	100	100	0	100	0	0	0	0	0	0	1960	19.6
1658	6	3	F	A only	0	0	0	0	96	0	4	100	96	4	96	0	0	0	0	0	0	1881.6	19.6
1659	6	3	F	A only	0	0	0	0	100	0	0	100	100	0	100	0	0	0	0	0	0	1960	19.6
1679	6	5	F	A only	0	0	0	0	98	0	2	100	98	2	98	0	0	0	0	0	0	1920.8	19.6
1681	6	5	F	A only	0	0	0	0	100	0	0	100	100	0	100	0	0	0	0	0	0	1960	19.6
1691	6	9	F	A only	0	0	0	0	100	0	0	100	100	0	100	0	0	0	0	0	0	1960	19.6
1743	5	1	F	A + WF	11	0	0	11	88	0	1	100	99	1	88	11	11	0	0	623.04	0	1724.8	23.7156
1747	5	2	F	A + WF	7	0	0	7	91	0	2	100	98	2	91	7	7	0	0	396.48	0	1783.6	22.2457
1805	5	9	F	A + WF	5	0	0	5	94	0	1	100	99	1	94	5	5	0	0	283.2	0	1842.4	21.4707
2068	3	17	F	A + WF	2	5	0	7	89	0	4	100	96	4	89	7	2	5	0	113.28	124.5	1744.4	20.6477
2135	2	2	F	A only	0	0	0	0	100	0	0	100	100	0	100	0	0	0	0	0	0	1960	19.6
2209	2	12	F	A only	0	0	0	0	98	0	2	100	98	2	98	0	0	0	0	0	0	1920.8	19.6
537	19	12	F	A + WF	0	0	0	0	99	0	1	100	99	1	99	0	0	0	0	0	0	1940.4	19.6
676	17	1	F	A only	0	0	0	0	100	0	0	100	100	0	100	0	0	0	0	0	0	1960	19.6
783	16	9	F	A only	0	0	0	0	99	0	1	100	99	1	99	0	0	0	0	0	0	1940.4	19.6
784	16	9	F	A only	0	0	0	0	99	0	1	100	99	1	99	0	0	0	0	0	0	1940.4	19.6
1130	12	6	F	A + WF	0	1	0	1	97	0	2	100	98	2	97	1	0	1	0	0	24.9	1901.2	19.6541
1308	10	23	F	A only	0	0	0	0	100	0	0	100	100	0	100	0	0	0	0	0	0	1960	19.6
1440	9	18	F	A + WF	1	0	0	1	98	0	1	100	99	1	98	1	1	0	0	56.64	0	1920.8	19.9741
1596	7	4	F	A only	0	0	0	0	94	0	6	100	94	6	94	0	0	0	0	0	0	1842.4	19.6
1598	7	4	F	A only	0	0	0	0	97	0	3	100	97	3	97	0	0	0	0	0	0	1901.2	19.6
1689	6	9	F	A only	0	0	0	0	100	0	0	100	100	0	100	0	0	0	0	0	0	1960	19.6
2151	2	4	F	A only	0	0	0	0	100	0	0	100	100	0	100	0	0	0	0	0	0	1960	19.6
2177	2	8	F	A only	0	0	0	0	100	0	0	100	100	0	100	0	0	0	0	0	0	1960	19.6
2186	2	9	F	A only	0	0	0	0	100	0	0	100	100	0	100	0	0	0	0	0	0	1960	19.6
2203	2	11	F	A only	0	0	0	0	100	0	0	100	100	0	100	0	0	0	0	0	0	1960	19.6
543	19	13	F	A + WF	1	1	0	2	97	0	1	100	99	1	97	2	1	1	0	56.64	24.9	1901.2	20.0277
544	19	14	F	A + WF	2	0	0	2	95	0	3	100	97	3	95	2	2	0	0	113.28	0	1862	20.3637
548	19	14	F	A + WF	0	0	0	0	97	0	3	100	97	3	97	0	0	0	0	0	0	1901.2	19.6
710	17	4	F	A only	0	0	0	0	99	0	1	100	99	1	99	0	0	0	0	0	0	1940.4	19.6
1286	10	17	F	A only	0	0	0	0	99	1	0	100	99	1	99	0	0	0	0	0	0	1940.4	19.6
1429	9	16	F	A + WF	0	0	0	0	98	0	2	100	98	2	98	0	0	0	0	0	0	1920.8	19.6
1548	8	10	F	WF only	70	28	0	98	0	0	2	100	98	2	0	98	70	28	0	3964.8	697.2	0	47.5714
2178	2	8	F	A only	0	0	0	0	100	0	0	100	100	0	100	0	0	0	0	0	0	1960	19.6
2199	2	11	F	A only	0	0	0	0	98	0	2	100	98	2	98	0	0	0	0	0	0	1920.8	19.6
2202	2	11	F	A only	0	0	0	0	100	0	0	100	100	0	100	0	0	0	0	0	0	1960	19.6
545	19	14	F	A + WF	2	0	0	2	96	0	2	100	98	2	96	2	2	0	0	113.28	0	1881.6	20.3559
976	14	9	F	A + WF	0	0	0	0	100	0	0	100	100	0	100	0	0	0	0	0	0	1960	19.6
2108	3	22	F	A + WF	0	1	0	1	96	0	3	100	97	3	96	1	0	1	0	0	24.9	1881.6	19.6546
2211	2	12	F	A only	0	0	0	0	98	0	2	100	98	2	98	0	0	0	0	0	0	1920.8	19.6
547	19	14	F	A + WF	0	1	0	1	98	0	1	100	99	1	98	1	0	1	0	0	24.9	1920.8	19.6535
1985	3	2	F	A + WF	0	0	0	0	99	0	1	100	99	1	99	0	0	0	0	0	0	1940.4	19.6
2208	2	12	F	A only	0	0	0	0	100	0	0	100	100	0	100	0	0	0	0	0	0	1960	19.6
2210	2	12	F	A only	0	0	0	0	100	0	0	100	100	0	100	0	0	0	0	0	0	1960	19.6

## Sheet: provision qual+offspring cond
capsule no.	cage no.	nest no.	sex	treatment	phacelia (no. pollen grains)	helmul (no. pollen grains)	helann (no. pollen grains)	total WF (no. pollen grains)	alfalfa (no. pollen grains)	unidentifiable (no. pollen grains)	total pollen grains counted	total pollen grains with ID	total pollen grains unknown/unidentifiable	alfalfa pollen (%)	WF pollen (%)	phacelia pollen (%)	helmul pollen (%)	helann pollen (%)	phacelia protein content (56.64%)	helmul protein content (24.9%)	alfalfa protein content (19.6%; Stace 1996)	pollen provision protein content (%)	vial no.	initial body weight	final body weight	lipid mass (mg)	lipid mass (ug)	percent body lipids	proportion body lipids	head width (mm)
1443	9	19	F	A + WF	6	0	0	6	92	2	100	98	2	92	6	6	0	0	339.84	0	1803.2	21.8678	1148	0.0066	0.0059	0.0007	7	10.6061	0.106061	2.52
989	14	11	F	A + WF	35	5	0	40	60	0	100	100	0	60	40	35	5	0	1982.4	124.5	1176	32.829	1162	0.0075	0.006	0.0015	15	20	0.2	2.52
1332	9	3	F	A + WF	41	1	0	42	58	0	100	100	0	58	42	41	1	0	2322.24	24.9	1136.8	34.8394	1157	0.01	0.0088	0.0012	12	12	0.12	2.84024
1841	5	16	F	A + WF	99	0	0	99	1	0	100	100	0	1	99	99	0	0	5607.36	0	19.6	56.2696	1153	0.0125	0.0105	0.002	20	16	0.16	3
2078	3	19	F	A + WF	47	0	0	47	53	0	100	100	0	53	47	47	0	0	2662.08	0	1038.8	37.0088	1159	0.008	0.0061	0.0019	19	23.75	0.2375	2.68
167	22	7	F	A + WF	37	0	0	37	58	5	100	95	5	58	37	37	0	0	2095.68	0	1136.8	34.0261	1205	0.0129	0.0107	0.0022	22	17.0543	0.170543	2.9726
177	22	8	F	A + WF	62	0	0	62	38	0	100	100	0	38	62	62	0	0	3511.68	0	744.8	42.5648	1203	0.0153	0.0128	0.0025	25	16.3399	0.163399	3.24
262	22	23	F	A + WF	8	6	0	14	85	1	100	99	1	85	14	8	6	0	453.12	149.4	1666	22.9143	1192	0.0084	0.0069	0.0015	15	17.8571	0.178571	2.72
469	19	2	F	A + WF	34	0	0	34	64	2	100	98	2	64	34	34	0	0	1925.76	0	1254.4	32.4506	1175	0.0113	0.0096	0.0017	17	15.0442	0.150442	2.92
573	19	18	F	A + WF	1	0	0	1	99	0	100	100	0	99	1	1	0	0	56.64	0	1940.4	19.9704	1207	0.0122	0.0097	0.0025	25	20.4918	0.204918	2.92
955	14	7	F	A + WF	20	0	0	20	79	1	100	99	1	79	20	20	0	0	1132.8	0	1548.4	27.0828	1195	0.0122	0.0106	0.0016	16	13.1148	0.131148	3
983	14	10	F	A + WF	35	2	0	37	63	0	100	100	0	63	37	35	2	0	1982.4	49.8	1234.8	32.67	1214	0.0105	0.0085	0.002	20	19.0476	0.190476	2.84
1000	14	14	F	A + WF	28	0	0	28	72	0	100	100	0	72	28	28	0	0	1585.92	0	1411.2	29.9712	1213	0.014	0.0115	0.0025	25	17.8571	0.178571	3.12
1008	14	15	F	A + WF	17	0	0	17	81	2	100	98	2	81	17	17	0	0	962.88	0	1587.6	26.0253	1186	0.0124	0.0109	0.0015	15	12.0968	0.120968	3.04
1010	14	15	F	A + WF	28	1	0	29	71	0	100	100	0	71	29	28	1	0	1585.92	24.9	1391.6	30.0242	1198	0.0117	0.0093	0.0024	24	20.5128	0.205128	3
1019	14	16	F	A + WF	13	0	0	13	87	0	100	100	0	87	13	13	0	0	736.32	0	1705.2	24.4152	1194	0.0126	0.0104	0.0022	22	17.4603	0.174603	3.12
1021	14	16	F	A + WF	3	1	0	4	95	1	100	99	1	95	4	3	1	0	169.92	24.9	1862	20.776	1212	0.0119	0.0099	0.002	20	16.8067	0.168067	3
1022	14	16	F	A + WF	6	0	0	6	94	0	100	100	0	94	6	6	0	0	339.84	0	1842.4	21.8224	1211	0.0136	0.0112	0.0024	24	17.6471	0.176471	3.08
1072	13	13	F	A + WF	26	0	0	26	73	1	100	99	1	73	26	26	0	0	1472.64	0	1430.8	29.3277	1171	0.0124	0.011	0.0014	14	11.2903	0.112903	3
1073	13	13	F	A + WF	13	0	0	13	86	1	100	99	1	86	13	13	0	0	736.32	0	1685.6	24.4638	1215	0.0104	0.0086	0.0018	18	17.3077	0.173077	2.88
1083	13	18	F	A + WF	25	0	0	25	73	2	100	98	2	73	25	25	0	0	1416	0	1430.8	29.049	1164	0.0121	0.0103	0.0018	18	14.876	0.14876	3
1086	13	18	F	A + WF	10	0	0	10	88	2	100	98	2	88	10	10	0	0	566.4	0	1724.8	23.3796	1185	0.0108	0.0094	0.0014	14	12.963	0.12963	3
1087	13	18	F	A + WF	4	1	0	5	93	2	100	98	2	93	5	4	1	0	226.56	24.9	1822.8	21.1659	1209	0.0126	0.0104	0.0022	22	17.4603	0.174603	3.04
1117	12	4	F	A + WF	55	0	0	55	42	3	100	97	3	42	55	55	0	0	3115.2	0	823.2	40.6021	1210	0.0114	0.0093	0.0021	21	18.4211	0.184211	2.88
1153	12	12	F	A + WF	29	0	0	29	69	2	100	98	2	69	29	29	0	0	1642.56	0	1352.4	30.5608	1201	0.0108	0.0094	0.0014	14	12.963	0.12963	2.88
1391	9	11	F	A + WF	47	0	0	47	52	1	100	99	1	52	47	47	0	0	2662.08	0	1019.2	37.1846	1193	0.0161	0.0132	0.0029	29	18.0124	0.180124	3.24
1405	9	12	F	A + WF	70	0	0	70	28	2	100	98	2	28	70	70	0	0	3964.8	0	548.8	46.0571	1172	0.0112	0.0094	0.0018	18	16.0714	0.160714	2.92
1418	9	15	F	A + WF	26	0	0	26	72	2	100	98	2	72	26	26	0	0	1472.64	0	1411.2	29.4269	1188	0.0111	0.0098	0.0013	13	11.7117	0.117117	2.88
1432	9	17	F	A + WF	29	0	0	29	70	1	100	99	1	70	29	29	0	0	1642.56	0	1372	30.4501	1187	0.0107	0.0096	0.0011	11	10.2804	0.102804	2.96
1753	5	3	F	A + WF	49	0	0	49	51	0	100	100	0	51	49	49	0	0	2775.36	0	999.6	37.7496	1208	0.0152	0.0122	0.003	30	19.7368	0.197368	3.2
1776	5	6	F	A + WF	69	0	0	69	30	1	100	99	1	30	69	69	0	0	3908.16	0	588	45.4158	1166	0.0132	0.011	0.0022	22	16.6667	0.166667	3.04
1833	5	15	F	A + WF	34	0	0	34	66	0	100	100	0	66	34	34	0	0	1925.76	0	1293.6	32.1936	1196	0.0142	0.0119	0.0023	23	16.1972	0.161972	3.12
1844	5	16	F	A + WF	71	0	0	71	28	1	100	99	1	28	71	71	0	0	4021.44	0	548.8	46.164	1202	0.0143	0.0117	0.0026	26	18.1818	0.181818	3.10496
1988	3	3	F	A + WF	51	0	0	51	48	1	100	99	1	48	51	51	0	0	2888.64	0	940.8	38.6812	1197	0.0136	0.0115	0.0021	21	15.4412	0.154412	3.08
133	22	1	F	A + WF	52	0	0	52	47	1	100	99	1	47	52	52	0	0	2945.28	0	921.2	39.0554	1341	0.0135	0.0113	0.0022	22	16.2963	0.162963	3.12
149	22	4	F	A + WF	0	0	0	0	100	0	100	100	0	100	0	0	0	0	0	0	1960	19.6	1347	0.0104	0.0091	0.0013	13	12.5	0.125	2.96
158	22	5	F	A + WF	0	0	0	0	100	0	100	100	0	100	0	0	0	0	0	0	1960	19.6	1333	0.0123	0.0097	0.0026	26	21.1382	0.211382	3.08
168	22	7	F	A + WF	13	0	0	13	85	2	100	98	2	85	13	13	0	0	736.32	0	1666	24.5135	1242	0.0117	0.0098	0.0019	19	16.2393	0.162393	3.01672
170	22	7	F	A + WF	14	0	0	14	85	1	100	99	1	85	14	14	0	0	792.96	0	1666	24.838	1223	0.0103	0.0091	0.0012	12	11.6505	0.116505	2.88
176	22	8	F	A + WF	25	0	0	25	75	0	100	100	0	75	25	25	0	0	1416	0	1470	28.86	1268	0.0159	0.0129	0.003	30	18.8679	0.188679	3.28
178	22	8	F	A + WF	20	0	0	20	76	4	100	96	4	76	20	20	0	0	1132.8	0	1489.6	27.3167	1227	0.0136	0.0116	0.002	20	14.7059	0.147059	3.2
219	22	15	F	A + WF	5	0	0	5	94	1	100	99	1	94	5	5	0	0	283.2	0	1842.4	21.4707	1232	0.0076	0.0058	0.0018	18	23.6842	0.236842	2.64
220	22	15	F	A + WF	34	0	0	34	66	0	100	100	0	66	34	34	0	0	1925.76	0	1293.6	32.1936	1241	0.0088	0.008	0.0008	8	9.09091	0.0909091	2.76
574	19	18	F	A + WF	5	0	0	5	94	1	100	99	1	94	5	5	0	0	283.2	0	1842.4	21.4707	1334	0.0138	0.0114	0.0024	24	17.3913	0.173913	3.12
583	19	19	F	A + WF	20	0	0	20	79	1	100	99	1	79	20	20	0	0	1132.8	0	1548.4	27.0828	1259	0.0123	0.0105	0.0018	18	14.6341	0.146341	3.08
585	19	19	F	A + WF	55	0	0	55	44	1	100	99	1	44	55	55	0	0	3115.2	0	862.4	40.1778	1254	0.0146	0.0121	0.0025	25	17.1233	0.171233	3.2
965	14	8	F	A + WF	19	1	0	20	80	0	100	100	0	80	20	19	1	0	1076.16	24.9	1568	26.6906	1332	0.0132	0.0105	0.0027	27	20.4545	0.204545	3.10496
998	14	14	F	A + WF	68	4	0	72	27	1	100	99	1	27	72	68	4	0	3851.52	99.6	529.2	45.2558	1244	0.0125	0.0114	0.0011	11	8.8	0.088	3.08
999	14	14	F	A + WF	35	2	0	37	63	0	100	100	0	63	37	35	2	0	1982.4	49.8	1234.8	32.67	1345	0.0141	0.0121	0.002	20	14.1844	0.141844	3.2
1020	14	16	F	A + WF	9	0	0	9	90	1	100	99	1	90	9	9	0	0	509.76	0	1764	22.9673	1253	0.0137	0.0117	0.002	20	14.5985	0.145985	3.2
1071	13	13	F	A + WF	24	0	0	24	73	3	100	97	3	73	24	24	0	0	1359.36	0	1430.8	28.7645	1235	0.0135	0.0116	0.0019	19	14.0741	0.140741	3.12
1084	13	18	F	A + WF	9	0	0	9	91	0	100	100	0	91	9	9	0	0	509.76	0	1783.6	22.9336	1239	0.0136	0.011	0.0026	26	19.1176	0.191176	3.08
1088	13	18	F	A + WF	0	0	0	0	100	0	100	100	0	100	0	0	0	0	0	0	1960	19.6	1222	0.0121	0.01	0.0021	21	17.3554	0.173554	3.04
1107	12	3	F	A + WF	40	0	0	40	60	0	100	100	0	60	40	40	0	0	2265.6	0	1176	34.416	1247	0.0076	0.0057	0.0019	19	25	0.25	2.72
1118	12	4	F	A + WF	10	0	0	10	90	0	100	100	0	90	10	10	0	0	566.4	0	1764	23.304	1271	0.013	0.0107	0.0023	23	17.6923	0.176923	3.04
1331	9	3	F	A + WF	56	2	0	58	41	1	100	99	1	41	58	56	2	0	3171.84	49.8	803.6	40.659	1224	0.0133	0.0111	0.0022	22	16.5414	0.165414	3.04
1373	9	9	F	A + WF	56	0	0	56	42	2	100	98	2	42	56	56	0	0	3171.84	0	823.2	40.7657	1243	0.0107	0.0086	0.0021	21	19.6262	0.196262	2.92
1393	9	11	F	A + WF	62	0	0	62	36	2	100	98	2	36	62	62	0	0	3511.68	0	705.6	43.0335	1258	0.0143	0.012	0.0023	23	16.0839	0.160839	3.12
1752	5	3	F	A + WF	48	0	0	48	50	2	100	98	2	50	48	48	0	0	2718.72	0	980	37.742	1237	0.0139	0.0106	0.0033	33	23.741	0.23741	3.12
1760	5	4	F	A + WF	23	2	0	25	74	1	100	99	1	74	25	23	2	0	1302.72	49.8	1450.4	28.3123	1249	0.0138	0.0116	0.0022	22	15.942	0.15942	3.12
1761	5	4	F	A + WF	35	0	0	35	64	1	100	99	1	64	35	35	0	0	1982.4	0	1254.4	32.6949	1337	0.0187	0.0147	0.004	40	21.3904	0.213904	3.4
1762	5	4	F	A + WF	15	0	0	15	84	1	100	99	1	84	15	15	0	0	849.6	0	1646.4	25.2121	1238	0.0147	0.012	0.0027	27	18.3673	0.183673	3.16
1775	5	6	F	A + WF	60	0	0	60	39	1	100	99	1	39	60	60	0	0	3398.4	0	764.4	42.0485	1261	0.0153	0.0118	0.0035	35	22.8758	0.228758	3.12
1831	5	15	F	A + WF	33	0	0	33	65	2	100	98	2	65	33	33	0	0	1869.12	0	1274	32.0727	1230	0.012	0.0103	0.0017	17	14.1667	0.141667	3
1832	5	15	F	A + WF	16	0	0	16	82	2	100	98	2	82	16	16	0	0	906.24	0	1607.2	25.6473	1225	0.0133	0.0107	0.0026	26	19.5489	0.195489	3.08
1834	5	15	F	A + WF	21	0	0	21	79	0	100	100	0	79	21	21	0	0	1189.44	0	1548.4	27.3784	1265	0.0122	0.0102	0.002	20	16.3934	0.163934	3.04
1843	5	16	F	A + WF	35	0	0	35	65	0	100	100	0	65	35	35	0	0	1982.4	0	1274	32.564	1266	0.0134	0.0107	0.0027	27	20.1493	0.201493	3.08
2026	3	10	F	A + WF	32	3	0	35	62	3	100	97	3	62	35	32	3	0	1812.48	74.7	1215.2	31.9833	1218	0.0143	0.0116	0.0027	27	18.8811	0.188811	3.10496
2067	3	17	F	A + WF	75	0	0	75	25	0	100	100	0	25	75	75	0	0	4248	0	490	47.38	1226	0.007	0.0059	0.0011	11	15.7143	0.157143	2.64
2098	3	21	F	A + WF	41	2	0	43	55	2	100	98	2	55	43	41	2	0	2322.24	49.8	1078	35.2045	1257	0.015	0.0119	0.0031	31	20.6667	0.206667	3.1932
2100	3	21	F	A + WF	47	4	0	51	49	0	100	100	0	49	51	47	4	0	2662.08	99.6	960.4	37.2208	1264	0.0125	0.0104	0.0021	21	16.8	0.168	2.96
2122	3	24	F	A + WF	85	1	0	86	11	3	100	97	3	11	86	85	1	0	4814.4	24.9	215.6	52.1124	1342	0.0138	0.0111	0.0027	27	19.5652	0.195652	3.12
2123	3	24	F	A + WF	86	0	0	86	14	0	100	100	0	14	86	86	0	0	4871.04	0	274.4	51.4544	1263	0.015	0.0122	0.0028	28	18.6667	0.186667	3.16
150	22	4	F	A + WF	0	0	0	0	100	0	100	100	0	100	0	0	0	0	0	0	1960	19.6	1314	0.0099	0.0081	0.0018	18	18.1818	0.181818	2.84
159	22	5	F	A + WF	0	0	0	0	99	1	100	99	1	99	0	0	0	0	0	0	1940.4	19.6	1306	0.0133	0.0102	0.0031	31	23.3083	0.233083	3.12
169	22	7	F	A + WF	15	0	0	15	83	2	100	98	2	83	15	15	0	0	849.6	0	1626.8	25.2694	1278	0.0119	0.01	0.0019	19	15.9664	0.159664	2.96
212	22	12	F	A + WF	18	0	0	18	82	0	100	100	0	82	18	18	0	0	1019.52	0	1607.2	26.2672	1299	0.0112	0.0093	0.0019	19	16.9643	0.169643	2.92
235	22	17	F	A + WF	0	0	0	0	98	2	100	98	2	98	0	0	0	0	0	0	1920.8	19.6	1293	0.0105	0.0088	0.0017	17	16.1905	0.161905	2.92
572	19	18	F	A + WF	14	1	0	15	84	1	100	99	1	84	15	14	1	0	792.96	24.9	1646.4	24.8915	1291	0.0144	0.0126	0.0018	18	12.5	0.125	3.24
982	14	10	F	A + WF	27	0	0	27	72	1	100	99	1	72	27	27	0	0	1529.28	0	1411.2	29.7018	1372	0.0105	0.0085	0.002	20	19.0476	0.190476	2.88
1018	14	16	F	A + WF	13	0	0	13	87	0	100	100	0	87	13	13	0	0	736.32	0	1705.2	24.4152	1274	0.011	0.0097	0.0013	13	11.8182	0.118182	2.96
1029	14	17	F	A + WF	12	0	0	12	88	0	100	100	0	88	12	12	0	0	679.68	0	1724.8	24.0448	1290	0.0126	0.0105	0.0021	21	16.6667	0.166667	3.08
1080	13	17	F	A + WF	0	0	0	0	99	1	100	99	1	99	0	0	0	0	0	0	1940.4	19.6	1365	0.012	0.0099	0.0021	21	17.5	0.175	3.06084
1081	13	17	F	A + WF	5	0	0	5	94	1	100	99	1	94	5	5	0	0	283.2	0	1842.4	21.4707	1374	0.0137	0.0112	0.0025	25	18.2482	0.182482	3.10496
1085	13	18	F	A + WF	32	0	0	32	68	0	100	100	0	68	32	32	0	0	1812.48	0	1332.8	31.4528	1284	0.0145	0.0119	0.0026	26	17.931	0.17931	3.14908
1138	12	7	F	A + WF	17	0	0	17	82	1	100	99	1	82	17	17	0	0	962.88	0	1607.2	25.9604	1311	0.0127	0.0101	0.0026	26	20.4724	0.204724	3.01672
1374	9	9	F	A + WF	46	0	0	46	54	0	100	100	0	54	46	46	0	0	2605.44	0	1058.4	36.6384	1298	0.0117	0.0097	0.002	20	17.094	0.17094	3
1449	9	20	F	A + WF	55	0	0	55	44	1	100	99	1	44	55	55	0	0	3115.2	0	862.4	40.1778	1315	0.0115	0.0087	0.0028	28	24.3478	0.243478	3
1772	5	5	F	A + WF	11	3	0	14	85	1	100	99	1	85	14	11	3	0	623.04	74.7	1666	23.8762	1292	0.0139	0.0116	0.0023	23	16.5468	0.165468	3.08
1778	5	6	F	A + WF	65	0	0	65	35	0	100	100	0	35	65	65	0	0	3681.6	0	686	43.676	1280	0.0145	0.0115	0.003	30	20.6897	0.206897	3.1932
1786	5	7	F	A + WF	41	0	0	41	57	2	100	98	2	57	41	41	0	0	2322.24	0	1117.2	35.0963	1300	0.0139	0.011	0.0029	29	20.8633	0.208633	3
1787	5	7	F	A + WF	35	0	0	35	63	2	100	98	2	63	35	35	0	0	1982.4	0	1234.8	32.8286	1304	0.0181	0.0144	0.0037	37	20.442	0.20442	3.28
1795	5	8	F	A + WF	31	0	0	31	67	2	100	98	2	67	31	31	0	0	1755.84	0	1313.2	31.3167	1366	0.0118	0.0093	0.0025	25	21.1864	0.211864	2.96
1796	5	8	F	A + WF	36	0	0	36	62	2	100	98	2	62	36	36	0	0	2039.04	0	1215.2	33.2065	1296	0.0114	0.0092	0.0022	22	19.2982	0.192982	2.92
2027	3	10	F	A + WF	12	4	0	16	82	2	100	98	2	82	16	12	4	0	679.68	99.6	1607.2	24.3518	1279	0.0125	0.0095	0.003	30	24	0.24	2.9726
2079	3	19	F	A + WF	79	0	0	79	21	0	100	100	0	21	79	79	0	0	4474.56	0	411.6	48.8616	1312	0.0134	0.0113	0.0021	21	15.6716	0.156716	3.10496
2088	3	20	F	A + WF	21	2	0	23	76	1	100	99	1	76	23	21	2	0	1189.44	49.8	1489.6	27.564	1288	0.0122	0.0102	0.002	20	16.3934	0.163934	2.9726
2089	3	20	F	A + WF	0	2	0	2	96	2	100	98	2	96	2	0	2	0	0	49.8	1881.6	19.7082	1310	0.0111	0.009	0.0021	21	18.9189	0.189189	2.88
2101	3	21	F	A + WF	35	0	0	35	65	0	100	100	0	65	35	35	0	0	1982.4	0	1274	32.564	1301	0.0165	0.0136	0.0029	29	17.5758	0.175758	3.28
148	22	4	F	A + WF	0	0	0	0	100	0	100	100	0	100	0	0	0	0	0	0	1960	19.6	1453	0.0112	0.0087	0.0025	25	22.3214	0.223214	2.92
194	22	11	F	A + WF	2	0	0	2	98	0	100	100	0	98	2	2	0	0	113.28	0	1920.8	20.3408	1441	0.0109	0.0084	0.0025	25	22.9358	0.229358	2.92
195	22	11	F	A + WF	1	0	0	1	97	2	100	98	2	97	1	1	0	0	56.64	0	1901.2	19.978	1448	0.01	0.0085	0.0015	15	15	0.15	2.84024
224	22	16	F	A + WF	0	0	0	0	97	3	100	97	3	97	0	0	0	0	0	0	1901.2	19.6	1432	0.011	0.0087	0.0023	23	20.9091	0.209091	3.04
234	22	17	F	A + WF	3	0	0	3	97	0	100	100	0	97	3	3	0	0	169.92	0	1901.2	20.7112	1468	0.0108	0.009	0.0018	18	16.6667	0.166667	2.92
252	22	20	F	A + WF	5	0	0	5	94	1	100	99	1	94	5	5	0	0	283.2	0	1842.4	21.4707	1466	0.0092	0.0073	0.0019	19	20.6522	0.206522	2.8
470	19	2	F	A + WF	12	0	0	12	81	7	100	93	7	81	12	12	0	0	679.68	0	1587.6	24.3794	1449	0.0121	0.0102	0.0019	19	15.7025	0.157025	3
546	19	14	F	A + WF	2	0	0	2	97	1	100	99	1	97	2	2	0	0	113.28	0	1901.2	20.3483	1464	0.0147	0.012	0.0027	27	18.3673	0.183673	3.12
1137	12	7	F	A + WF	12	0	0	12	86	2	100	98	2	86	12	12	0	0	679.68	0	1685.6	24.1355	1458	0.0129	0.0103	0.0026	26	20.155	0.20155	3.08
1148	12	9	F	A + WF	89	0	0	89	10	1	100	99	1	10	89	89	0	0	5040.96	0	196	52.8986	1428	0.0129	0.0095	0.0034	34	26.3566	0.263566	3.08
1375	9	9	F	A + WF	35	0	0	35	64	1	100	99	1	64	35	35	0	0	1982.4	0	1254.4	32.6949	1442	0.0122	0.0097	0.0025	25	20.4918	0.204918	3.06084
1420	9	15	F	A + WF	15	0	0	15	83	2	100	98	2	83	15	15	0	0	849.6	0	1626.8	25.2694	1474	0.0127	0.0103	0.0024	24	18.8976	0.188976	3.04
1450	9	20	F	A + WF	14	0	0	14	83	3	100	97	3	83	14	14	0	0	792.96	0	1626.8	24.946	1434	0.0097	0.0085	0.0012	12	12.3711	0.123711	2.92
1748	5	2	F	A + WF	5	0	0	5	95	0	100	100	0	95	5	5	0	0	283.2	0	1862	21.452	1463	0.0114	0.0096	0.0018	18	15.7895	0.157895	2.92
1771	5	5	F	A + WF	6	0	0	6	94	0	100	100	0	94	6	6	0	0	339.84	0	1842.4	21.8224	1433	0.0114	0.0092	0.0022	22	19.2982	0.192982	2.9726
1788	5	7	F	A + WF	14	0	0	14	83	3	100	97	3	83	14	14	0	0	792.96	0	1626.8	24.946	1447	0.0145	0.0117	0.0028	28	19.3103	0.193103	3.12
1808	5	10	F	A + WF	43	0	0	43	54	3	100	97	3	54	43	43	0	0	2435.52	0	1058.4	36.0198	1444	0.0132	0.011	0.0022	22	16.6667	0.166667	3.04
1998	3	4	F	A + WF	27	0	0	27	69	4	100	96	4	69	27	27	0	0	1529.28	0	1352.4	30.0175	1456	0.0115	0.009	0.0025	25	21.7391	0.217391	2.88
538	19	12	F	A + WF	1	0	0	1	98	1	100	99	1	98	1	1	0	0	56.64	0	1920.8	19.9741	1425	0.0126	0.0106	0.002	20	15.873	0.15873	3.08
539	19	12	F	A + WF	2	1	0	3	95	2	100	98	2	95	3	2	1	0	113.28	24.9	1862	20.41	1406	0.0131	0.0103	0.0028	28	21.374	0.21374	3.04
1079	13	17	F	A + WF	4	6	0	10	89	1	100	99	1	89	10	4	6	0	226.56	149.4	1744.4	21.4178	1408	0.0147	0.0115	0.0032	32	21.7687	0.217687	3.2
1419	9	15	F	A + WF	5	0	0	5	93	2	100	98	2	93	5	5	0	0	283.2	0	1822.8	21.4898	1415	0.012	0.0102	0.0018	18	15	0.15	2.9726
1451	9	20	F	A + WF	6	0	0	6	90	4	100	96	4	90	6	6	0	0	339.84	0	1764	21.915	1424	0.011	0.0095	0.0015	15	13.6364	0.136364	3
1457	9	22	F	A + WF	45	2	0	47	51	2	100	98	2	51	47	45	2	0	2548.8	49.8	999.6	36.7163	1420	0.0116	0.0097	0.0019	19	16.3793	0.163793	3.01672
1458	9	22	F	A + WF	37	0	0	37	57	6	100	94	6	57	37	37	0	0	2095.68	0	1117.2	34.1796	1423	0.0105	0.0095	0.001	10	9.52381	0.0952381	2.92848
1797	5	8	F	A + WF	17	0	0	17	82	1	100	99	1	82	17	17	0	0	962.88	0	1607.2	25.9604	1426	0.0103	0.0086	0.0017	17	16.5049	0.165049	2.88
215	22	14	F	A + WF	19	2	0	21	78	1	100	99	1	78	21	19	2	0	1076.16	49.8	1528.8	26.8158	1385	0.0137	0.0112	0.0025	25	18.2482	0.182482	3.16
1129	12	6	F	A + WF	0	0	0	0	97	3	100	97	3	97	0	0	0	0	0	0	1901.2	19.6	1391	0.0135	0.0105	0.003	30	22.2222	0.222222	3.04
1743	5	1	F	A + WF	11	0	0	11	88	1	100	99	1	88	11	11	0	0	623.04	0	1724.8	23.7156	1389	0.0144	0.0116	0.0028	28	19.4444	0.194444	3.1932
1747	5	2	F	A + WF	7	0	0	7	91	2	100	98	2	91	7	7	0	0	396.48	0	1783.6	22.2457	1397	0.0146	0.0117	0.0029	29	19.863	0.19863	3.12
1805	5	9	F	A + WF	5	0	0	5	94	1	100	99	1	94	5	5	0	0	283.2	0	1842.4	21.4707	1387	0.0141	0.0114	0.0027	27	19.1489	0.191489	3.08
2068	3	17	F	A + WF	2	5	0	7	89	4	100	96	4	89	7	2	5	0	113.28	124.5	1744.4	20.6477	1399	0.0109	0.009	0.0019	19	17.4312	0.174312	2.79612
537	19	12	F	A + WF	0	0	0	0	99	1	100	99	1	99	0	0	0	0	0	0	1940.4	19.6	1326	0.0116	0.0093	0.0023	23	19.8276	0.198276	2.9726
1130	12	6	F	A + WF	0	1	0	1	97	2	100	98	2	97	1	0	1	0	0	24.9	1901.2	19.6541	1319	0.0125	0.0096	0.0029	29	23.2	0.232	3
1440	9	18	F	A + WF	1	0	0	1	98	1	100	99	1	98	1	1	0	0	56.64	0	1920.8	19.9741	1327	0.0092	0.0079	0.0013	13	14.1304	0.141304	2.84024
543	19	13	F	A + WF	1	1	0	2	97	1	100	99	1	97	2	1	1	0	56.64	24.9	1901.2	20.0277	1353	0.012	0.01	0.002	20	16.6667	0.166667	3.04
544	19	14	F	A + WF	2	0	0	2	95	3	100	97	3	95	2	2	0	0	113.28	0	1862	20.3637	1352	0.0142	0.0108	0.0034	34	23.9437	0.239437	3.12
548	19	14	F	A + WF	0	0	0	0	97	3	100	97	3	97	0	0	0	0	0	0	1901.2	19.6	1359	0.0108	0.0091	0.0017	17	15.7407	0.157407	2.88436
1429	9	16	F	A + WF	0	0	0	0	98	2	100	98	2	98	0	0	0	0	0	0	1920.8	19.6	1351	0.0089	0.0075	0.0014	14	15.7303	0.157303	2.68
545	19	14	F	A + WF	2	0	0	2	96	2	100	98	2	96	2	2	0	0	113.28	0	1881.6	20.3559	1362	0.0141	0.0115	0.0026	26	18.4397	0.184397	3.12
976	14	9	F	A + WF	0	0	0	0	100	0	100	100	0	100	0	0	0	0	0	0	1960	19.6	1360	0.0079	0.0075	0.0004	4	5.06329	0.0506329	2.68
2108	3	22	F	A + WF	0	1	0	1	96	3	100	97	3	96	1	0	1	0	0	24.9	1881.6	19.6546	1361	0.0137	0.0108	0.0029	29	21.1679	0.211679	3.10496
547	19	14	F	A + WF	0	1	0	1	98	1	100	99	1	98	1	0	1	0	0	24.9	1920.8	19.6535	1364	0.0139	0.0116	0.0023	23	16.5468	0.165468	3.12
1985	3	2	F	A + WF	0	0	0	0	99	1	100	99	1	99	0	0	0	0	0	0	1940.4	19.6	1317	0.0125	0.01	0.0025	25	20	0.2	3.04
